# Supplementary material for: Hyperaccumulation of zinc by Noccaea caerulescens results in a cascade of stress responses and changes in the elemental profile
Source: Royal Society of Chemistry journal article supplement (doi:10.1039/c4mt00132j), 2014-01-01
Supplement: c4mt00132j1.xlsx [file c4mt00132j1.xlsx]

## Sheet: GC-MS data
Metabolites	UID	RTavg	"Quant Ion"	c_1_1	c_2_1	c_3_1	c_4_1	c_5_1	c_6_1	c_7_1	c_8_1	c_9_1	c_10_1	l_11_1	l_12_1	l_13_1	l_14_1	l_15_1	l_16_1	l_17_1	l_18_1	l_19_1	l_20_1	m_21_1	m_22_1	m_23_1	m_24_1	m_25_1	m_26_1	m_27_1	m_28_1	m_29_1	m_30_1	h_31_1	h_32_1	h_33_1	h_34_1	h_35_1	h_36_1	h_37_1	h_38_1	h_39_1	h_40_1
	Weights (mg)			71.39	57.79	58.46	60.91	61.78	57.85	55.27	54.71	62.4	57.5	62.5	63.1	62.3	61.8	59.2	65.2	61.4	63.1	58.7	65.4	62.9	58.1	58.6	57.9	60.2	62.3	60.2	56.3	58.8	60.3	60.7	60.6	64.6	60.5	59.7	62.1	59	60.4	58.9	61.5
	117-74-19-338.66	5.644	74	NA	NA	NA	NA	NA	NA	NA	NA	NA	NA	NA	NA	NA	NA	NA	NA	NA	NA	NA	NA	NA	NA	NA	NA	NA	NA	NA	NA	NA	NA	NA	610665	468764	611642	NA	NA	NA	NA	450961	489450
	174-130-70-338.89	5.648	174	NA	235494	245103	251947	NA	206859	251011	203130	258509	NA	240869	251537	221453	289855	268299	240514	251154	251783	NA	272052	253153	NA	248130	265155	262081	NA	NA	281046	NA	NA	215900	273830	268099	244566	244492	230948	116474	230340	248859	276673
	221-103-24-340.12	5.669	103	229883	175614	205335	174645	260877	229409	252322	242435	249366	240438	123599	286026	254594	189178	238021	198595	255550	210299	229016	290679	170949	187705	193520	254365	242584	NA	272585	285290	260834	NA	244805	301324	285804	228450	230959	150033	269371	142978	222789	164716
	77-67-1-340.93	5.682	318	NA	NA	75616.6	71530.8	52254.8	NA	70681.2	52042.2	NA	NA	75004.5	60512.7	NA	77022.7	83210.4	95716.4	85973.7	70774.1	55060.6	92116.7	NA	NA	NA	NA	NA	NA	NA	NA	NA	NA	64701.7	89605	100840	94639.1	NA	76680.2	NA	NA	90225.9	106361
	75-66-29-341.74	5.696	66	66138.7	76719.2	58147	66174.8	58196	88154.3	76813.6	65088.7	73230.6	53495.7	49726.3	46579.5	82745.3	49661.3	53062.8	55588.6	58557	44243.4	40356.5	72487.8	73972.2	47366	47790.7	60125.7	53850.7	NA	50384.7	66940.1	46915.9	NA	42867.4	53755.2	71341.4	52755.9	48119.6	47695.5	43200.1	36293.6	54436.7	65100.8
	89-88-2-343.32	5.722	175	NA	NA	NA	NA	NA	NA	NA	NA	NA	NA	NA	NA	NA	NA	NA	NA	NA	NA	NA	NA	NA	NA	NA	NA	NA	NA	NA	NA	NA	NA	NA	NA	NA	20314.6	22223.1	17437	18662.5	17619.7	NA	NA
	89-72-2-344.22	5.737	89	252520	325611	251958	309187	191570	215623	358469	203550	291897	377264	211453	268219	382775	287659	251817	217251	233731	249897	211734	340367	164252	210352	230917	209789	254548	NA	NA	233201	226699	NA	224439	265413	269588	NA	NA	NA	NA	NA	173885	193657
	146-143-73-344.59	5.743	146	15375.5	15228.6	27256.8	29245.4	16735.7	NA	NA	NA	NA	NA	NA	NA	NA	NA	NA	NA	NA	NA	NA	NA	NA	NA	NA	NA	NA	NA	NA	NA	NA	NA	12455	NA	NA	37369.7	22235.6	19776	33668.6	20983.9	NA	NA
	258-77-20-346.79	5.78	258	898688	NA	958593	1.02203e+06	710094	661153	428521	668075	859624	1.05385e+06	455089	904734	906757	1.01302e+06	675977	588723	451304	838532	963598	882484	406046	871996	905215	672243	857654	NA	833698	622269	954886	NA	688027	717723	816082	940435	977873	476472	1.06788e+06	646539	473215	782090
	66-61-12-347.58	5.793	66	111815	272335	128271	145461	116897	115443	163333	86662.8	140278	133831	115665	105741	114025	96538.5	114617	89816.3	95449.3	108714	73090.8	103607	83169.5	109375	96649.4	100835	97016.4	NA	101137	93461.3	84525.3	NA	77488.5	102751	126457	102381	110823	94404.8	78082.3	106290	112898	95038.3
	173-91-37-348.27	5.805	173	NA	NA	NA	NA	NA	NA	NA	NA	NA	NA	NA	NA	NA	NA	NA	NA	NA	NA	NA	NA	NA	NA	NA	NA	NA	NA	NA	NA	NA	NA	NA	35349.4	NA	27244.5	21576.4	21432.6	16889.3	NA	NA	NA
	311-223-48-350.26	5.838	311	15697.7	18727.9	18276.1	16119.4	29464.2	13549.1	15588.4	16625.2	11126.2	17891.5	23295.6	19016.6	31155.9	17100.2	17926.6	11001	18961.2	16697.8	16166.8	15644.2	14382.8	17021.1	14607.5	13480.4	15756.5	NA	12822.3	11050.6	NA	NA	13802.4	13920.1	9540.52	15852	18419.4	17249.7	15041.4	13319.1	21727.1	17219.6
	116-75-38-351.97	5.866	116	1.16469e+06	765668	810180	813770	1.08261e+06	465241	347446	1.03632e+06	764475	1161463	582718	1.24597e+06	515478	930946	903812	481853	413021	776564	921990	856483	491414	1.08104e+06	1.31166e+06	672435	946472	417512	1.20732e+06	631425	1.16031e+06	637541	812560	946159	631967	937098	1.32345e+06	638122	1.34703e+06	626825	398148	544391
	165-163-97-353.02	5.884	163	16492.1	12619.5	19402.4	16479	NA	11510.3	NA	NA	NA	18703.7	12612.7	22339.1	NA	24214.3	19093.9	17792.5	NA	17430.9	15578.1	26687.2	19729.9	24617.4	19049.3	18678.5	16324.7	NA	NA	NA	16461.5	NA	14108	16386.8	NA	15161.3	17149.2	21140.8	19153.2	14742.9	NA	NA
	148-72-88-355.19	5.92	148	50734.5	54827.8	52891	59199.3	66687.3	27539.4	36205.1	41776.3	59807.4	60162.6	40999.3	57217	49269.2	54607	53842	25319	33139.4	64303.3	39496.4	61351.9	35788.8	66403	59900	42154.7	47695.9	NA	68345.7	49394.1	50887.4	NA	38323.5	60022.9	51895.1	57724.4	58790	45093.2	58225.8	43620.8	42345.3	45947.4
	151-79-26-357.83	5.964	151	187681	287913	362773	371231	238885	193672	239752	228568	351920	207003	305358	248032	NA	367148	363252	360432	259346	368768	240636	347779	307786	382901	361019	341382	355137	242267	231325	360726	251194	184151	223459	337902	328084	361691	254057	334195	254838	329882	315522	317220
	77-72-61-359.76	5.996	72	1.75244e+06	3.84867e+06	1.92022e+06	1.98238e+06	1.11856e+06	2.20699e+06	1.76701e+06	1.14036e+06	2.04104e+06	3.14252e+06	2.05103e+06	1.45986e+06	4.04025e+06	1.93794e+06	1.42751e+06	1.611e+06	2.19657e+06	1.6044e+06	1.08855e+06	2.07607e+06	1.69386e+06	1.69695e+06	1.4686e+06	1.9345e+06	1.77826e+06	4.38546e+06	1.45682e+06	2.36092e+06	1.30273e+06	5.77984e+06	1.64934e+06	1.87998e+06	2.24443e+06	2.15186e+06	1.64635e+06	1.54231e+06	1.47395e+06	1.61116e+06	2.59058e+06	2.79258e+06
	154-80-10-360.46	6.008	80	NA	45939.6	38455.5	32037.1	27016.8	NA	47672.4	NA	40996.7	24362.7	42796.8	33853.8	35800	46289.2	50147.2	35760	54305.7	42524.1	27592	42713.6	32426.3	40069.8	32680.7	38634.6	44203.9	NA	31060.9	39460	31094.5	NA	27581.3	48870.3	47832.8	42769.6	35467	32703.6	30055	40890.7	49511.2	44154.7
	89-81-3-362.61	6.044	89	209861	191296	180342	164587	133437	124498	110549	181819	194402	305128	173786	181210	NA	261541	NA	133555	131491	234319	137569	235392	NA	162682	156304	NA	219365	NA	164635	NA	164032	NA	123175	231903	NA	147059	282306	122482	183180	134035	NA	NA
L-alanine 1	116-75-5-364.29	6.071	116	4.72308e+06	6.73538e+06	4.71536e+06	4.76099e+06	2.96147e+06	4.46135e+06	4739199	3.67167e+06	5.21827e+06	6.53745e+06	4.47327e+06	4.19857e+06	3.73391e+06	5.36759e+06	3.65439e+06	4.25085e+06	6.10316e+06	5.11134e+06	3.64295e+06	4.77229e+06	3.77966e+06	4.83419e+06	4.42275e+06	5.88498e+06	5.86019e+06	NA	5.15662e+06	3.3328e+06	4.34842e+06	NA	4.7777e+06	4.98969e+06	4.06634e+06	3.42038e+06	5.18526e+06	3.2601e+06	4.09147e+06	3.04727e+06	3.64327e+06	4.8188e+06
	154-75-7-365.80	6.097	154	56844.2	226816	143683	137496	87433.3	52401.2	229532	59135.8	170376	116590	171755	107813	NA	176061	174568	111001	224604	150370	93063	170287	119524	144394	102985	150514	179950	327404	92200.5	156872	90758.9	338779	103533	181977	176855	147110	116953	101537	94862.2	131560	186849	175441
	258-116-65-368.24	6.137	258	1.63998e+06	1.12213e+06	1.57802e+06	1.6177e+06	1.42208e+06	1.14069e+06	NA	1.15439e+06	NA	1.97771e+06	812320	1.71527e+06	1.59757e+06	1609922	1254243	1.03271e+06	NA	1.55397e+06	1.77659e+06	NA	NA	NA	NA	NA	NA	NA	NA	NA	NA	NA	1.05831e+06	NA	NA	1.48673e+06	1.69983e+06	1.04027e+06	1.96575e+06	1.29279e+06	788797	NA
	174-128-22-369.34	6.156	174	NA	174701	160645	171606	NA	117869	140503	138501	157809	NA	157678	NA	80284.6	187643	189253	170568	148458	183931	NA	166746	156291	205453	169288	177796	188154	NA	NA	165024	NA	83623.3	139228	182042	152907	161815	NA	170006	NA	NA	157509	157688
	258-116-75-373.70	6.228	258	1.11173e+07	7.52365e+06	9915164	1.02755e+07	9.18204e+06	7.70498e+06	6.89253e+06	8.59546e+06	1.07132e+07	1.07911e+07	6.56023e+06	9.9539e+06	1.07599e+07	1.03874e+07	9.38566e+06	7094066	7.21888e+06	1.04356e+07	1.0203e+07	1.1242e+07	7.23688e+06	9.17631e+06	10109880	9.7389e+06	1.03159e+07	8.1197e+06	1.00231e+07	9.88007e+06	9.97121e+06	7.36047e+06	7.10044e+06	1.01537e+07	1.06857e+07	9.92105e+06	1.0519e+07	7.53966e+06	1.08644e+07	7.49169e+06	5.58549e+06	1.11e+07
	245-115-8-374.59	6.243	245	NA	NA	NA	NA	NA	NA	NA	NA	NA	NA	29119.3	NA	39143.2	35931.2	NA	29168.2	41598	37781.4	NA	NA	NA	NA	NA	NA	NA	NA	NA	NA	NA	NA	32208.2	40281	NA	34072.6	NA	NA	NA	43634.5	25825.4	38749.2
	102-94-0-376.70	6.278	102	NA	300537	207590	196924	NA	265553	582397	213330	319320	149420	205857	NA	338848	NA	NA	259135	351875	136278	NA	251892	NA	NA	NA	NA	NA	NA	NA	NA	NA	NA	NA	202472	367538	NA	NA	128367	NA	NA	246288	210523
	206-100-25-378.76	6.313	294	4943.67	7312.38	5529.86	5904.14	5443.67	4089.57	8597.19	5047.19	6354.71	5925.14	7051.76	NA	NA	5919.29	5736.95	5970.1	8306.9	5912.1	4750.95	NA	5292.81	6364.57	6492.1	5773.81	6117.38	NA	5771.57	5820.71	5608.24	NA	7321.95	5910.14	5572.38	5182.24	5799.57	5539	5961.05	5909	7171.14	NA
	75-74-95-380.87	6.348	74	161082	166851	172390	169474	173083	153304	126468	149617	191711	108677	176834	124695	141971	179610	167449	135376	136218	176659	135910	204283	113818	167413	191482	132605	176457	NA	149847	178146	138634	NA	138523	214879	186505	145367	124825	117406	113091	119615	164322	169071
	104-103-84-381.52	6.359	104	21604	NA	NA	46698.3	33062.4	NA	NA	NA	28275.5	NA	NA	30237.9	NA	55212	29867.1	18485.7	NA	27631.3	27486.4	NA	NA	NA	NA	NA	NA	NA	NA	NA	NA	NA	42472.9	48796.4	NA	40684.8	20230.1	29730.7	33905	32815.3	NA	NA
	218-149-20-382.66	6.378	218	20194.2	30167.3	29688	NA	31214.4	23862	NA	NA	24764.4	NA	NA	24366.9	21391	28451	NA	22590	NA	23903.3	21953.2	NA	NA	NA	NA	NA	NA	NA	NA	NA	NA	NA	NA	NA	NA	NA	NA	NA	NA	NA	NA	NA
	130-75-38-385.17	6.419	74	236038	235051	295355	292925	259286	244996	247569	233699	292317	200369	270696	227551	249553	336600	286504	221695	258164	269125	229909	315414	243004	274033	263122	272957	280458	284224	271189	334307	248511	246535	240794	323738	297910	246493	232690	215138	216927	222041	256033	283538
	191-170-3-386.18	6.436	191	NA	52699.5	37905.3	37374.4	NA	NA	NA	30478.1	NA	55902.8	NA	NA	NA	NA	NA	NA	NA	NA	NA	NA	NA	NA	NA	NA	NA	NA	NA	NA	NA	NA	NA	NA	NA	NA	NA	NA	NA	NA	NA	NA
	133-75-46-388.84	6.481	235	289736	311422	393962	272754	386686	405158	465227	280554	273712	305340	382297	216844	439105	419144	292279	330589	442402	212819	193797	434668	545707	366944	302694	290502	364308	495179	246278	533057	241035	279018	353711	245950	408686	506680	335885	340298	295207	300068	471764	453975
	177-125-74-389.82	6.497	177	NA	NA	NA	NA	NA	NA	NA	NA	NA	NA	NA	NA	NA	NA	NA	NA	NA	NA	NA	NA	NA	NA	NA	NA	NA	NA	NA	NA	NA	NA	22354.4	29637.6	NA	NA	NA	NA	21543.5	21757.6	25629	22159
	191-128-2-390.63	6.51	193	55078.8	71719.1	66463.8	65998	61242	47648.7	55395.6	51407.3	74947.3	67119	55322.8	65661.2	35070.3	73894.5	71601.4	61715.4	64174.3	66309.6	61056.8	75596.9	67450.2	67421	62399.5	75499.3	74272.2	37406.5	58549.3	60346.6	63160.6	24679.9	53045.7	72357.7	64057.4	66293.3	61642.7	58682.1	60976.9	57033.5	47756.7	55671.1
	158-115-94-392.90	6.548	158	24490.3	30312	29076.1	32045.1	29088.4	28749.6	29497.6	28562.9	33087.6	28944.2	30153.5	29487.9	29836.7	33239.1	NA	31805.5	26791.1	28297.8	27760.2	33665.1	30038.1	30994.8	28709.6	31125.3	31159.7	31483.8	26382.7	34673.7	29614.5	32955.4	24531.6	33428.9	35109.2	31349.3	31180	30452.1	29062.1	27574.3	29899	31351.9
	152-150-13-394.12	6.569	167	15431.3	28512.1	20462.5	19728.8	15305.6	15401.2	26616.3	14390.5	23821	20135.9	20897.1	16516.3	18601	20361.3	19184.4	20262.4	24015.6	19534	14433.3	24932.8	23348.6	22887.9	21395.1	22275.3	23879.6	26872.4	17681.2	24840.6	17783.5	28101.6	19616.6	24592	22335.7	23857.5	19431.8	19387.1	18183.1	20621.2	27345	30258.3
	163-133-95-395.29	6.588	163	38361	42092.2	47152.4	48026	45383.1	39028.5	45926.8	44128.3	50482.9	48078.1	44072.9	46122.5	46595.7	54001	48573.9	44982.9	37467.4	43507	42440.3	50455.8	40065.2	49968.1	46106.1	45726	46781.6	44941.9	43426.8	52121.9	45333.7	49388.5	38511.4	52983.9	55258.6	43429.8	47607.1	45141.6	46223.6	43442	43909.9	47667.7
	116-77-22-396.55	6.609	116	26682.7	35428.2	29146.4	29210.3	21869.8	29450.6	46068.9	27588.2	37863.4	26288.8	26090.6	22469.3	71790.6	NA	40924.4	26078.3	55442.6	28476.6	25701.2	46839.5	57526.3	25117.7	26078.5	53800.3	33295.8	140636	24097	63480.9	22958.9	225392	25026	35939.4	64334.1	52865.7	20813.3	19945	22932.7	26068.1	44825.9	63540.2
	75-72-12-397.08	6.618	75	NA	NA	249603	NA	191348	NA	NA	183569	229999	165575	181109	184615	NA	140516	188470	NA	NA	215803	161418	259405	166801	206305	233927	198057	215319	NA	206897	244176	207393	NA	NA	NA	NA	NA	NA	NA	NA	NA	NA	NA
	142-100-15-398.23	6.637	142	180130	365117	187955	207898	83773.4	303089	585005	152657	283085	176843	188261	138880	590071	196609	173403	270985	312314	168449	111645	289400	162701	132789	201750	309619	234107	498479	146364	365381	120935	380789	298935	401086	590350	255445	213093	207568	150252	198702	396606	360350
	281-74-24-400.49	6.675	369	48167.1	125422	152755	89012	120756	58803.7	79556.7	64630.3	82863.3	67158.6	90514.5	95432.6	139030	79127.5	122480	87268.2	78238.8	100889	73699.8	88313.7	71948.3	107138	86948.8	80566.9	81199.8	82059.5	77683.2	89961.5	74442.9	67498.3	59625.8	84063.5	88494.8	101167	96855.9	89773	71755.4	86797.3	99926.4	90129.1
	86-75-14-401.47	6.691	86	90136.9	174302	106150	87158	55869.1	145879	134779	86151.4	147219	99281.5	169487	110041	336900	139120	148733	125845	173231	104120	79775.3	148342	155566	86040.5	93982.4	264583	148658	444137	87587.2	192717	80540.7	528348	131385	136623	296315	214810	89081.3	119780	65168.4	77826.2	233717	236547
	128-117-44-402.99	6.716	128	57315	NA	22584.7	25146.4	19568.6	46821.4	36755.9	34917	25722.6	NA	NA	25450.7	NA	27096.7	19276.3	26531.4	25208.6	25536.1	32967.4	30525.8	12734	17771.6	21050.9	50136.2	26204.1	NA	NA	20422.1	27622.3	NA	51131.1	24679.4	38416.8	24739.6	NA	16332.8	24648.3	20719.2	22949.1	NA
	148-66-69-404.20	6.737	227	NA	NA	NA	NA	NA	NA	NA	NA	NA	NA	NA	79322.9	NA	88837.1	NA	115861	NA	76026.1	62660.6	170231	114487	92353	116602	88308.4	126815	NA	99946.6	215096	67425.9	NA	117875	63815.9	120240	NA	97859.6	59857.2	60109	53183	NA	129233
	75-74-33-405.12	6.752	152	NA	NA	NA	NA	NA	NA	NA	NA	NA	NA	31042.7	23678.2	NA	27443.2	28798.3	NA	NA	30462.4	21516.3	NA	NA	NA	NA	30826.5	39603.5	44860	NA	NA	NA	48985.3	34482.5	NA	NA	37970.4	29595.9	35784.9	30242.1	34936	49581.3	NA
	220-188-64-405.98	6.766	220	20520.5	18607.3	27440.1	16183.1	26892	33541.8	58029	23298.7	14768.9	18719.9	NA	NA	NA	NA	NA	NA	NA	NA	NA	NA	NA	NA	NA	NA	NA	NA	NA	NA	NA	NA	24718.8	NA	32233	26452	22356.9	28912.4	17520.3	19227.6	NA	37425.7
	221-75-53-408.52	6.809	74	134538	NA	168299	168998	140156	118361	97758	113242	166411	128856	141214	119849	120783	172471	144174	115724	137742	158074	147575	181019	119214	150059	177627	153245	162509	167865	175977	187040	150408	86467	132213	211358	192307	129186	139767	120247	123303	126835	119747	154101
	84-82-6-409.85	6.831	84	NA	NA	NA	NA	NA	NA	NA	NA	NA	NA	79394.2	NA	NA	105960	79095.5	67467.5	120586	82205	NA	113691	92642.4	84596.1	66235.8	102492	104551	109450	NA	103271	NA	113020	30438.3	129322	102078	NA	NA	62003.7	61869.8	67568.3	81535.9	109864
	156-67-13-410.30	6.838	156	27649.2	43437.6	NA	32777.1	NA	24085.7	NA	21460.9	34406.6	22287.7	NA	NA	NA	NA	NA	NA	NA	NA	NA	NA	NA	NA	NA	NA	NA	NA	NA	NA	NA	NA	NA	NA	NA	34200.1	38044.6	37413	34830.9	34997.3	51320.3	46135
Phosphoric acid monomethyl ester	241-144-40-411.58	6.86	241	334586	2.10868e+06	303547	504791	501950	506201	494993	553348	233085	2.02476e+06	657129	682602	577670	1.2153e+06	415244	519784	745496	388795	280210	464289	202584	221922	330901	256333	389459	238466	404147	358638	527858	140857	200812	311200	126304	184301	300443	177218	623283	140196	268284	165101
	71-65-0-412.79	6.88	85	25632.2	32252.9	27928.9	30241.6	26678.8	34702.4	25641.7	25870.2	28056.9	26754.5	26339.4	27513.3	45532	32897.5	31891.1	26250	25311.7	29464.2	24832.5	29730.9	27256.2	31718.9	27742.4	30139.6	30634.4	25594.2	29323.6	29792.3	25796.9	NA	28417.6	29229	28237	27018.3	27275.5	25823.3	26115	25895.2	25104.8	27523.3
	69-60-0-415.13	6.919	69	NA	NA	NA	NA	NA	NA	NA	NA	NA	NA	23283.3	6524.86	NA	NA	10109	9133.86	NA	5994.38	NA	NA	NA	NA	2690.43	NA	11153.4	NA	8884.1	9378.24	NA	42029.4	NA	8434.76	NA	12362.1	5604.33	9096.38	8295.43	15954.3	24750.5	NA
L-proline 1	70-68-5-416.64	6.944	70	5.22923e+06	7.72262e+06	6.22447e+06	6.96072e+06	4.56306e+06	9.78174e+06	1.34396e+07	6574289	1.12476e+07	4.2893e+06	6.58077e+06	4.35055e+06	1.40719e+07	5.83283e+06	5.23239e+06	6.62091e+06	9.39598e+06	4809715	3.19211e+06	1.01599e+07	9.28203e+06	5.36029e+06	5.18487e+06	6.49985e+06	8.29888e+06	1.88637e+07	4012082	1.48116e+07	4.20202e+06	2.62609e+07	5.32368e+06	1.01719e+07	7.92426e+06	6.03165e+06	4.44184e+06	7.36296e+06	5.16101e+06	6.62781e+06	1.03746e+07	1.57959e+07
	174-85-11-417.98	6.966	174	103567	189787	95015.8	98350.8	90232.8	87007	122392	76799.5	101459	109654	105709	105079	130108	103864	118419	96178.6	108348	92956.8	85167.7	116735	NA	98612.4	77331.2	114991	108173	NA	102549	NA	101745	NA	76772	100592	50748.2	45168.7	71510.4	NA	92655.1	81907	NA	NA
	221-69-56-418.78	6.98	221	37406.7	38267.2	38291	38786.1	49470.2	20143.6	32040	27206	49656.3	45281.5	28420.9	55113.6	NA	56846.4	40345.2	30745.3	NA	46769.3	50783.4	41520.4	32856	45809.6	57222.4	49369.4	58577	NA	58858.4	42900.7	53823.5	12107.6	31866.3	47241.5	NA	32458.6	56064	37316.5	47042.6	55594.3	19675.9	28288.9
	132-74-44-420.30	7.005	132	252469	90488.9	103652	96868	77091.3	62148.2	159479	96840.5	178860	258129	95296.9	97955.7	NA	183696	69816.4	91879.2	551380	177469	176420	253608	138940	108241	246034	175362	164962	114616	282052	191439	83416.3	NA	101625	230246	470896	97584.5	146963	74273	323855	91201.3	64946.1	140190
	151-104-53-421.59	7.027	104	37915	NA	48294	51843	40341.3	26307.7	20724.9	40697.1	40739.4	16223.9	38407	41158.2	25150.8	51391.7	42242.4	26098.4	39638	40459.4	41387.7	53009.4	28152.7	43017.7	51381.4	37657.9	39214.6	39427.4	50221.2	46636	40535.3	31408.6	40285.3	52838	47495.1	40559.1	35623.2	35516.6	45103.2	36968.8	29333.7	37585.7
	148-72-41-423.97	7.066	148	93632.6	117068	91309.6	91411	72499.2	58849.5	76866.3	73755	96921.8	95397.6	76907.9	87115.5	109629	90497.8	81588.1	54847.8	66793.5	97887.8	66856.7	100855	54829	102878	86978.4	68985	83373.5	62109.5	83618.4	83175.6	77671.7	63359.2	74710.3	83000.1	80455	91427.2	95609.4	69754.6	85270.7	75854.7	73230.4	70622.9
	281-220-21-425.02	7.084	369	11071.5	49141	35177.5	29908.3	21967	10484.5	28922.3	9130.71	33007.3	12889	45346	28575.6	16225.6	33812.2	46687.4	26546.6	26726.2	32622.6	11507	26617.8	26571.9	37779.8	29649.8	27968.7	36344.8	28273.5	27582.1	34589.8	18741.2	30229.7	10917	28318.2	35818.6	40936.6	27556.3	30860.6	14545.8	41379.9	51578.5	40994.2
	174-103-86-425.81	7.097	174	41853.1	48004.8	41981.7	39849.6	46730.4	31170.1	NA	36577.2	42054.4	45980	40524.1	42702.6	NA	50265.7	47164.4	34036.9	41652.3	52923.3	40796.5	45839.9	94564.8	56215.7	49599.5	51657.8	54078.9	NA	53076.7	82427.7	48524.8	NA	35218.4	53577.6	86455.5	39204.1	41652.7	40023.8	39116.1	38473.9	36426.2	33014
	170-141-35-426.96	7.116	141	107238	220375	92817.2	108409	55444	164154	144876	144317	174427	174218	72630.2	71851.3	113739	89562.9	53987.3	61610.3	94410.1	81343	51885.6	95080.1	65598	88516.1	60606.5	61871.8	86189.1	91496.1	68137.7	123693	61886.7	93466.4	79722.2	74718.5	73300.6	62740.6	61611.4	49893.3	70371.9	64134.8	77726.7	100512
	392-207-68-427.65	7.127	392	NA	15544.5	16042.6	15029.3	11511.3	12680.6	NA	12196.2	NA	NA	15617.6	11605	NA	14581.7	15121.8	NA	15347.6	NA	12505.1	17187.4	17012.3	NA	20992.2	15522.9	NA	NA	14245	19525.4	12694.8	NA	15878.2	17266.3	19841.7	20540.2	NA	NA	NA	NA	16510.7	NA
	148-75-88-428.50	7.142	66	99210.3	128933	80991.7	96043.5	46563.7	93273.1	132143	64635.9	114489	83953.6	94225.8	76773	180675	104256	94911	109294	91505.9	86448.6	66881.5	131986	85832.3	74672.6	89743.7	140785	121190	156885	82771.9	90831.1	78232	120016	124855	110286	192008	101578	106472	75817.8	79409.9	76039.1	119539	118300
	71-70-23-432.02	7.2	71	7.08201e+06	8.6416e+06	8.06904e+06	8.45263e+06	7.39935e+06	7.4665e+06	8.72584e+06	7.34615e+06	9.63757e+06	7.04008e+06	7.77095e+06	7729708	8.06972e+06	9.07584e+06	9.05063e+06	8.02359e+06	9090560	8.52015e+06	6.49007e+06	9.87835e+06	9.0377e+06	8.74142e+06	7.85005e+06	9.49904e+06	9.61095e+06	9.85608e+06	7.15009e+06	1.00504e+07	7.51681e+06	1.0089e+07	7.22769e+06	9.70315e+06	1.006e+07	8.52186e+06	7.57391e+06	7.71979e+06	7.35922e+06	7.55044e+06	8.50447e+06	1.0076e+07
	131-89-17-432.64	7.211	131	NA	35014.6	46572.3	47439.8	NA	NA	39657.9	NA	43767.7	NA	NA	NA	NA	NA	NA	NA	NA	NA	NA	NA	NA	NA	NA	NA	NA	NA	NA	NA	NA	NA	NA	NA	NA	NA	NA	NA	NA	NA	NA	NA
Valine	149-144-61-436.25	7.271	144	1.1973e+07	2.21345e+07	1.23203e+07	1.21944e+07	7.20425e+06	1.27368e+07	1.42937e+07	8.03267e+06	1.49868e+07	1.54273e+07	1.08501e+07	9.36349e+06	1.19729e+07	1.0552e+07	6.59557e+06	8.97482e+06	1.30256e+07	1.01419e+07	7.69918e+06	1.18879e+07	6.38112e+06	9.96031e+06	9.05129e+06	1.01769e+07	1.07106e+07	8.92335e+06	9.81952e+06	9.69863e+06	8.52976e+06	5.88008e+06	1.1162e+07	1.225e+07	1.07901e+07	7.82415e+06	1.05948e+07	8.3386e+06	9.63722e+06	9.8827e+06	9.43709e+06	1.06766e+07
	170-84-45-439.59	7.326	170	150686	497643	125606	155056	77951.1	172397	179174	100178	199468	268971	98210	85661.8	144164	126727	72088.1	85678.8	111070	102847	55232.8	129189	86075	108315	84666.3	91507.3	120145	119499	92145.7	141024	80685.3	132221	83709.6	92472	79638.3	88219.6	78450.8	69091.5	91598.3	78578.3	88625.9	124837
	219-103-45-441.43	7.357	219	78611.1	101933	50677	62658.7	39326.8	NA	81472	NA	79122.9	74646.5	64729	51368.6	70154.4	62356.2	26996.2	48699.2	42705.9	62048.5	34258.9	52868.7	31910.8	58649	56786.9	43467.7	62145.6	NA	48383	40872.9	40945.1	NA	61489.9	70482.8	44205.8	30427.7	62087.9	35137.7	32851.7	53815.6	48417.5	58749.5
	174-103-51-442.43	7.374	174	NA	43195.2	49047.5	43704	NA	51566.2	50410.9	48034.8	46237.4	34661.7	56914.7	42076	62543	55574.3	63040.3	44738.2	52752.5	49790	50350	50987.1	70541.9	48677.2	51654	54804.6	53996.4	67173	61345.7	54910.1	42895.4	38106	42745.3	NA	NA	51740	36502.3	42448.1	40792	39012.4	NA	NA
	102-71-11-442.48	7.375	102	NA	NA	NA	NA	NA	NA	NA	NA	NA	NA	NA	NA	NA	NA	NA	NA	NA	NA	NA	NA	NA	NA	NA	NA	NA	NA	NA	NA	NA	NA	59907.6	64182.7	63616.3	NA	NA	NA	NA	NA	67136.5	46127.3
	227-191-66-443.51	7.392	227	24188.8	71049.1	37013.5	35516.2	NA	27650.6	NA	NA	NA	64973.9	33407	NA	61988.7	NA	31018.8	32441.4	44958	NA	NA	NA	NA	NA	NA	NA	NA	NA	NA	NA	NA	NA	NA	NA	NA	NA	NA	NA	NA	NA	NA	NA
	218-144-89-443.78	7.396	144	NA	252379	188863	305822	207371	NA	NA	NA	359999	NA	NA	55530.4	NA	135388	84196.9	167832	247896	112622	134371	289899	170972	218210	171445	123283	178679	112437	NA	237396	58222	69096	202217	337214	142189	84655.7	NA	NA	211339	NA	NA	233115
	156-75-87-444.88	7.415	75	NA	317864	202023	211574	129739	NA	475027	102361	238566	NA	104040	102124	246593	119630	103492	102577	210912	106439	80282.7	336044	88124.1	92212.5	100843	127348	137759	163438	102623	142465	85388	181692	NA	162383	195021	111262	101399	93942.4	59673.3	NA	NA	141037
	103-102-82-445.73	7.429	103	82572.2	138966	56750.3	71501.9	46076	81791.2	89371.1	49887.7	68405.4	44365.5	38525	30702.9	79247.3	45203.4	34889.2	27907.6	71264.4	34328.7	29637.6	53412.8	NA	31189.3	34658.2	38007.9	35230.7	NA	35674	NA	32249	NA	34437.5	45651	37388.2	24301.2	28061.8	26309.7	22071.7	28521.7	61448.3	NA
	128-66-10-447.12	7.452	128	26970.1	61669.1	43254	42018.8	29994.4	25188.1	56691.3	NA	53418.8	52929.7	36408.8	28947.6	25209.3	38001.6	31302.4	25839.8	32518.9	33508.6	26095.9	28128.9	21270.2	31035.5	26542.5	28904.1	33974.7	20978.2	27065	28561.2	26995.3	13936.4	22935.1	30595	32622.3	25590	30798.2	24459.6	27737.3	33840.3	29803	29631.2
	131-101-64-447.96	7.466	131	NA	NA	NA	NA	NA	NA	NA	NA	NA	NA	15844.8	NA	24126.5	NA	26257.2	31265.7	NA	NA	20788.3	NA	17156.5	28008.4	29265.1	NA	37644.8	25701.8	NA	NA	NA	NA	NA	NA	NA	NA	NA	NA	NA	NA	NA	NA
	100-74-59-448.87	7.481	100	96078.3	140410	90608.8	102781	67254.8	107930	84639.8	65917.4	100442	123859	62995.2	61141.3	74836.4	81706.9	54882.8	66724.3	72595.4	77451.3	64724.6	74930.9	53434.9	79466.8	71271.6	65074.1	78825.3	58322	77583.9	59976.8	58192.2	42839.4	73292.9	93626.1	56720.7	54121.3	80888.1	63911.8	66972.5	61412.9	73005	72694.2
	144-67-8-450.83	7.514	144	376613	286996	264280	496104	380385	454917	470282	259299	367643	263179	251232	204008	122458	239386	163987	254966	253526	331270	175348	321894	198908	302622	176064	106878	156353	90593.6	249986	205710	225075	94662.8	309116	371174	147838	89064.6	98859.7	187775	357414	517429	218637	281202
	189-148-34-453.16	7.553	74	322309	168011	141091	147395	190778	323381	420259	260599	214986	166291	162189	99283	339230	158306	162992	138496	265303	168329	126020	205156	57963.6	121146	112965	151701	123777	191830	121559	138127	114008	170145	234032	174134	252304	165668	160701	98997.5	153009	114532	186486	137771
	219-145-22-454.04	7.567	220	NA	NA	33433.2	35642.4	27064.4	41478.3	NA	28114	30071.5	NA	NA	NA	NA	NA	NA	NA	NA	NA	NA	NA	17070.5	NA	28418.6	20636.6	NA	NA	NA	23177.7	NA	12803.7	29554	34600	20915.4	NA	32108.4	NA	26688.3	NA	NA	27553.8
	111-84-60-454.93	7.582	111	29130.5	NA	33164	34861	29044.3	31123.2	84007.4	31808.4	45871.7	30875.2	34826.4	27884.4	36049.7	33160.5	31726.2	32494	75210.3	33955.5	27152.6	59577	46916.8	30244.3	30386.2	43652.5	37332.4	67955	26092.6	48528.4	24776.7	73536.3	28742.6	51059.2	53179	34428.7	28239.9	28008.4	24596	26199.4	35151.7	40698.1
	100-89-32-456.44	7.607	100	NA	NA	NA	NA	NA	NA	NA	NA	NA	NA	NA	NA	NA	NA	NA	NA	NA	NA	NA	NA	NA	NA	NA	NA	NA	NA	NA	NA	NA	NA	NA	79796.3	NA	NA	65874.8	51446.7	54242.1	53447	NA	NA
	100-89-33-456.88	7.615	100	NA	28660	73297	72917	NA	NA	115960	NA	81125.5	67581.7	58496.4	50342.4	95896.8	78381.6	NA	63524.2	78544.5	70549.9	NA	NA	NA	NA	60596.7	NA	NA	48263	61150	NA	43516.9	34443.6	NA	NA	NA	NA	NA	NA	NA	NA	NA	NA
	218-100-65-456.96	7.616	100	NA	NA	NA	NA	NA	NA	NA	NA	NA	NA	NA	NA	NA	NA	NA	NA	NA	NA	NA	NA	41397.9	61649.9	NA	51798.3	65048.3	NA	NA	54156.3	NA	NA	70615.2	NA	NA	41836.5	NA	NA	NA	NA	62253.3	55495.6
	174-103-52-457.58	7.626	174	37961.4	NA	33159.3	33175.9	36759.1	31455.8	39481.3	35085.9	32754	36540.5	41899.1	44339.9	NA	52152.1	50675.4	38180.5	42883	45645.1	37397.5	34488.4	55683	36101	NA	37221.2	44515.7	NA	44760.1	NA	32227.3	20388	NA	44363.2	36445.2	31257	31717.5	28609.9	32304.2	26079.2	NA	NA
	210-115-40-459.42	7.657	210	31638	136506	25586.1	24298	13568.6	32182.2	11950.2	17985.2	34108.2	92037.5	13998	13599.9	25669.5	25287.7	9160	15903.4	24666.8	17426.9	12484.7	33936.3	13308.6	19125.3	16595	22674.9	26615	30503.3	15429.2	23997.7	NA	NA	25105.7	NA	13166.4	NA	14917	NA	16321.1	11106.2	NA	20995.6
	218-217-16-460.66	7.678	218	348051	501211	232925	356531	154582	343347	384911	219001	379257	219948	300971	219177	326764	262027	134270	233184	227942	271710	158012	233776	128984	255471	229289	170167	218003	159397	162228	182863	197930	80338	269497	341070	201952	154052	290890	211718	225928	239282	166263	228909
	130-69-53-461.63	7.694	130	NA	NA	77779.9	64637.5	42700.3	NA	471974	17697	85315.9	NA	214562	71451.8	566703	123923	120736	119948	377950	99788.5	67579.2	145425	126395	86802.9	95905.2	119802	158602	921014	91693.3	241803	92586	1.26182e+06	225000	186332	492605	130341	155290	106873	108080	150825	302151	320661
Serine	179-132-87-464.32	7.739	179	69465.2	204576	177360	184301	186364	NA	240911	114602	163524	173031	193248	190312	177382	139557	203015	137390	216445	192947	158253	224905	234395	199007	158057	171315	156630	NA	178320	185669	176457	NA	128062	214052	232569	189859	187884	172555	163397	175940	221950	165629
	72-71-37-465.15	7.752	166	NA	NA	NA	NA	NA	NA	NA	NA	NA	NA	NA	NA	NA	NA	NA	NA	NA	NA	NA	NA	NA	NA	NA	NA	NA	NA	NA	NA	NA	NA	NA	8998.95	4006.67	NA	NA	NA	6565.1	NA	18251.7	18332.6
	192-191-49-465.94	7.766	192	66628.5	83475.5	80438.1	84691.1	78218.3	74651.5	101995	73681.5	95890.2	77932.1	84653.9	79435.2	77572	90156.9	89108	84121.7	91893.2	86748.8	74825	97487.9	86550.1	89047.1	81527.2	95540.1	93169.5	97111	79867.9	103321	81888.7	97968.8	76862.5	94836.9	96240	89054	79294.9	77076.6	80021	80090.7	90514	100320
	174-117-17-469.74	7.829	174	4.4597e+06	7.40873e+06	1.4358e+06	3.88202e+06	3.43831e+06	3607867	4.55133e+06	4.12588e+06	1.784e+06	7.81006e+06	3.63584e+06	4.03991e+06	2.78806e+06	4.53782e+06	3.69782e+06	2.57234e+06	4.1864e+06	1.64206e+06	2.29261e+06	3091207	1.31209e+06	729384	1.52614e+06	2.63042e+06	970508	848864	1.59448e+06	2.16372e+06	2.57523e+06	520932	959735	2.98843e+06	1.30743e+06	983198	1.29365e+06	597620	1.90345e+06	933805	810008	456933
Phosphate	299-211-6-470.77	7.846	299	NA	3.43483e+06	2.04222e+06	1.96788e+06	2.02254e+06	NA	2.47703e+06	NA	2.75623e+06	2.34448e+06	2.30889e+06	1.9137e+06	2.08864e+06	2.79921e+06	1.92163e+06	1.75061e+06	1.83833e+06	1.98156e+06	1.35196e+06	1.81928e+06	1.37765e+06	2.26591e+06	2.02243e+06	2.21214e+06	2.54732e+06	2.16089e+06	1.9493e+06	2.34199e+06	1.96409e+06	2.22362e+06	2.37261e+06	1.9619e+06	3.61823e+06	2.79369e+06	2.55407e+06	1.8538e+06	2.18917e+06	2.69097e+06	3.07021e+06	3.65224e+06
Leucine	158-102-4-471.59	7.86	158	2.38208e+06	4.25166e+06	2.03582e+06	2.1285e+06	1.1574e+06	2.02474e+06	2.57619e+06	1.47617e+06	2.545e+06	3.49597e+06	1.92347e+06	1.9544e+06	2.04316e+06	1.84808e+06	1.26917e+06	1.45162e+06	2.15741e+06	1.6825e+06	1.47281e+06	1.73461e+06	950526	1.56271e+06	1.37665e+06	2.37209e+06	1.69198e+06	1.40652e+06	1.96087e+06	1.47629e+06	1.59368e+06	766740	1.92161e+06	2.00124e+06	2.50794e+06	1.29818e+06	1.91088e+06	1.42835e+06	NA	NA	1.60947e+06	1.6899e+06
	83-72-18-472.82	7.88	141	NA	15702.3	10150.1	11317.6	NA	NA	18542.4	NA	21154.5	NA	NA	NA	NA	NA	NA	NA	NA	NA	NA	NA	17991	NA	NA	18340.6	16663.3	19762.3	NA	19898.6	NA	20871.6	NA	NA	NA	NA	NA	NA	NA	NA	NA	NA
Pipecolic acid 1	84-75-8-475.91	7.932	75	243058	295977	173791	203161	123631	255767	415155	171308	259632	133445	326709	170131	562964	288878	312102	265028	231979	192361	201396	375833	159974	109057	174181	525435	342797	445866	174192	222070	168049	297928	298148	315260	559604	406904	233532	121700	135702	138217	431365	296510
	133-131-31-477.26	7.954	133	129544	100167	134368	154204	125000	177211	NA	104174	168913	72099.5	NA	NA	102115	168429	NA	130803	124165	148629	NA	171643	103287	NA	165994	156905	168669	112715	203006	158995	156291	77085.9	99183.8	225243	173970	50961.8	112981	120589	103414	NA	174478	147700
	174-101-17-477.94	7.966	174	265839	260662	NA	NA	107559	165525	300545	NA	75485.4	308201	153705	106713	NA	168872	125683	162362	NA	NA	116905	NA	NA	49458	93675.1	122937	NA	NA	80424	101991	136471	NA	NA	NA	NA	NA	91052.9	40652.3	NA	58012	NA	20011.3
	175-101-11-478.65	7.977	175	NA	NA	NA	NA	NA	NA	NA	NA	NA	NA	65628.5	NA	36269.5	NA	NA	40327.6	67757.5	22120.9	NA	44114.5	NA	NA	NA	NA	NA	NA	NA	NA	NA	NA	NA	NA	NA	NA	NA	NA	NA	NA	NA	NA
	71-70-34-479.77	7.996	71	42141.5	48709.1	46479.9	47735	43437.8	42246.6	55303.9	40044.8	51997.8	39883.5	45275.8	42866.6	42944.4	51717.7	52055.4	46399.2	50930.3	49568.9	39469.5	53440.5	52204.4	48631.5	45272.5	54954.5	52468.5	54280.3	45156.3	54970.6	43331.6	53368.4	43309.1	55521	55888.8	48669	43586	43217.5	42350.5	42805.6	47817.6	54704.8
	96-89-43-480.46	8.008	96	NA	NA	NA	NA	NA	NA	NA	NA	NA	NA	NA	NA	NA	NA	NA	NA	NA	NA	NA	NA	NA	NA	NA	10290	12694.4	NA	23291.8	14093.8	23072.3	NA	NA	NA	NA	NA	NA	NA	NA	NA	NA	NA
	218-96-14-480.65	8.011	218	NA	442253	235400	227193	118501	317306	NA	221911	NA	NA	NA	NA	NA	NA	NA	NA	NA	NA	NA	NA	NA	NA	NA	NA	NA	NA	NA	NA	NA	NA	NA	NA	NA	NA	NA	NA	NA	NA	NA	NA
	205-117-15-482.12	8.035	205	NA	NA	NA	NA	NA	NA	NA	NA	NA	NA	31627	30974.7	23629.8	33773.1	NA	NA	68910.8	NA	NA	NA	NA	NA	NA	NA	NA	NA	NA	NA	NA	NA	NA	NA	NA	NA	NA	NA	NA	NA	NA	NA
	144-116-10-482.84	8.047	144	NA	NA	NA	NA	NA	NA	NA	NA	NA	NA	NA	NA	110339	NA	108446	219760	294625	127133	NA	397893	NA	NA	NA	NA	NA	NA	NA	NA	NA	NA	NA	NA	NA	NA	NA	NA	NA	NA	NA	NA
	131-102-94-483.01	8.05	131	39751.8	50370.6	NA	NA	NA	41445	NA	31098.5	NA	40723.8	NA	NA	NA	NA	NA	NA	NA	NA	NA	NA	NA	NA	NA	NA	NA	NA	NA	NA	NA	NA	NA	NA	NA	NA	NA	NA	NA	NA	NA	NA
	157-123-19-484.29	8.072	157	NA	24383.3	14974.1	14536.4	14683.2	13132.1	23034.1	NA	18532.4	29046.6	15161.2	12812.4	NA	16912.4	16546.1	14513.5	18823.4	15269.1	14770.6	18282.4	12634.5	16455.4	14876	15299.3	18072.7	17107.6	13294.4	18782.4	14659.3	17694.6	NA	18153.5	NA	16136.4	14685.2	12896	14868	15518.6	17870	NA
DL-isoleucine 2	158-100-5-486.37	8.106	218	720279	1.22203e+06	535591	571495	333366	673707	773181	403507	724616	919625	652867	551253	647666	596085	345120	510112	581949	587366	454206	518524	313511	542152	510619	628503	594466	427699	559114	421951	483267	214518	641631	735077	687324	385330	650809	469770	513198	511370	471835	501343
	117-75-12-488.43	8.14	117	NA	NA	NA	NA	NA	NA	NA	NA	NA	NA	94999.6	NA	240778	35969.8	89037.4	51892	179586	37473.5	NA	120751	164711	NA	NA	159624	103787	576212	NA	191964	NA	964497	48751.2	158279	388250	121909	NA	NA	NA	NA	156888	259047
	341-224-56-488.64	8.144	429	7601.76	26264	19113.5	20146.3	21968.3	10237.7	31292.7	NA	NA	15620.5	NA	NA	NA	NA	NA	NA	NA	NA	NA	NA	42520.6	22937.6	18403.6	15719.7	NA	40812.3	22571.8	NA	20894.8	43449.7	NA	NA	36938.7	22195	22596	16123.8	17323.8	17112.4	NA	NA
	115-80-30-489.66	8.161	115	5616.05	45024	35023	30226.7	25298.6	NA	36430.1	17922.3	42074.5	19287.3	40032.6	22605.2	NA	31463.9	39531.4	NA	NA	27276.5	15874	NA	25119.4	30856.2	NA	NA	29603.5	NA	NA	41888.7	16551	NA	NA	NA	NA	NA	NA	NA	NA	NA	NA	NA
	320-169-61-490.26	8.171	320	NA	5865.95	10756	8359.71	4278.86	NA	NA	NA	NA	5113.19	12611.6	5606.1	10143.2	NA	4429.62	NA	25542.4	NA	NA	8672.14	NA	6263.76	6145.95	NA	NA	5857	6003.24	6700.43	5346.86	NA	8986.33	NA	4293.19	NA	6353.05	6193.43	6225.76	8225.86	5951.43	7216.24
L-proline 2	142-75-4-492.41	8.207	142	5.11454e+07	6.17003e+07	4.72324e+07	5.17262e+07	4.35422e+07	4.91611e+07	5.79006e+07	4.45002e+07	5.34639e+07	5.78028e+07	3.6388e+07	3.79588e+07	3.80651e+07	3.78212e+07	25986314	3.74818e+07	4.43443e+07	3.70436e+07	3.29852e+07	4.46225e+07	3.18004e+07	4.32837e+07	3.94236e+07	3.20834e+07	4.28028e+07	3.22454e+07	4.44495e+07	4.31432e+07	3.89431e+07	2.33468e+07	4.09475e+07	4.73612e+07	3.33645e+07	2.40734e+07	4.31219e+07	4.10316e+07	4.8768e+07	4.65166e+07	3.63658e+07	4.4128e+07
	245-83-38-493.87	8.231	245	NA	409944	313221	298199	224716	NA	273853	NA	284156	319522	304165	242980	243974	228195	231899	219703	243626	250968	176021	275234	150847	281921	235540	168381	267041	201563	240561	240898	211264	163234	187337	297090	209143	209959	250870	246726	220910	317437	286484	273483
Glycine	174-86-13-495.80	8.263	174	2.79206e+06	3.37424e+06	1.8472e+06	2.64517e+06	1.71055e+06	2.01292e+06	5.35972e+06	2.45112e+06	3.25309e+06	3.87405e+06	2.07924e+06	1.69459e+06	2.41905e+06	1.9933e+06	1.65388e+06	2007257	3.01643e+06	2.23406e+06	1.80016e+06	2.77109e+06	1.09259e+06	1.64593e+06	1.32868e+06	1.80303e+06	1.92955e+06	1.47989e+06	2.06723e+06	1.70669e+06	2.07496e+06	1.12091e+06	2.28777e+06	2.26479e+06	2.15527e+06	1.35964e+06	2.18309e+06	1.02225e+06	1.84842e+06	1.51406e+06	1786987	1440731
	69-65-0-497.02	8.284	69	11185.7	12243	NA	11707	11434.4	11900	15415.4	NA	14430.7	11158.4	NA	12963.1	NA	12090.5	NA	13082.5	14512.4	11241.7	9414.62	15187.5	12791	14238.5	11940.1	14466.6	14177.2	15523.7	11104.6	14731	11458.6	14920.2	12229.1	14198.5	NA	NA	10898.7	12263.3	11821.6	11114.5	12924.5	14419.9
	254-86-9-498.88	8.315	254	NA	NA	NA	NA	NA	NA	NA	NA	NA	NA	NA	49971.2	NA	72054.4	29956.6	54666.4	NA	67583.8	52877.5	99266.3	NA	NA	NA	NA	NA	NA	NA	NA	NA	NA	80467.5	NA	NA	37976.5	49554.6	29897.9	50002.9	37247.6	NA	NA
Succinic Acid	75-74-29-499.85	8.331	75	371918	575162	242699	290480	221882	291504	415300	221039	297108	341017	258363	303950	453975	331357	272231	311798	273302	282021	272442	453343	209971	224865	262949	747738	402094	386105	373364	262882	307478	345922	577649	430594	699823	397172	552395	187365	282633	244352	466497	380898
	174-158-46-501.99	8.366	174	18737.2	19756	18830.1	23246.6	14138.9	14877.1	22622.8	18030	17137.2	20945.4	NA	12756	14399	20084.5	14808	16632	NA	18315.6	11991.4	NA	NA	NA	NA	NA	NA	NA	NA	NA	NA	NA	NA	NA	NA	NA	NA	NA	NA	NA	NA	NA
	69-67-7-502.69	8.378	69	10909.3	NA	11993.8	11948	11591.9	12804.3	14443.1	10092.8	14344.4	11126.6	11298	12602.6	10851.5	14166.2	NA	13100	12382.8	13427.3	10711.1	14517.5	14410.7	13601	13333.4	14388.8	14607.7	16968.5	11728	15162	11418.2	14525.2	10832.8	15070.8	17618	13340.1	12760.9	12572.5	12276.7	12061.4	13097	14564.6
	72-65-1-504.76	8.413	72	NA	NA	NA	NA	NA	NA	NA	NA	NA	NA	20258.8	NA	NA	21976.4	NA	21704	NA	18192.6	NA	27673.4	NA	NA	NA	NA	NA	NA	NA	NA	NA	NA	NA	79698	24915	NA	NA	32167.9	43355.7	NA	49029.4	47821.3
	210-144-18-505.76	8.429	144	52351	214693	44865	45575.3	25814.7	55873.6	NA	32527.9	62149.4	126075	25086.7	26536.8	47957.1	50181.9	20785.5	30668.6	46359.3	32751.2	24311.5	64358.3	26860.7	34188.6	30281.8	41887.8	47686.8	57118.4	32280.4	45455.9	26718.3	49260.3	45964.3	31329.3	26097.1	31350.6	31556.8	21564.4	28672.6	21443.2	30759.2	41370.5
Glyceric acid	189-103-58-506.83	8.447	189	2.68214e+06	4.96314e+06	2.05927e+06	2.495e+06	1.73348e+06	2.55248e+06	3.00985e+06	1.53121e+06	2.81613e+06	2.53492e+06	1.79156e+06	1.65081e+06	2.60379e+06	2.4043e+06	1.79148e+06	2.33908e+06	1.91858e+06	2.05094e+06	1.54379e+06	3.29337e+06	1.44054e+06	2.04313e+06	2.19858e+06	2.84717e+06	2.82586e+06	2.71362e+06	2.72244e+06	2.43553e+06	2.29069e+06	2.88748e+06	3.60314e+06	2.98455e+06	2.58778e+06	2.12747e+06	2.39345e+06	1.89304e+06	1.93284e+06	1.96293e+06	3.09064e+06	2.814e+06
	72-69-10-508.68	8.478	355	NA	NA	6804.38	7054.33	NA	NA	NA	NA	8566.52	NA	7366.1	6727.1	NA	6522.33	9322	5446.24	NA	7351.9	3852.43	7003.29	NA	6989.33	5726.9	7014.57	7294.33	6167.76	6160.38	7025.43	4166.52	7863.38	NA	6692.9	NA	7638.57	4942.62	6264.24	NA	7333.62	9962.62	7695.57
	98-84-74-509.54	8.492	98	12526.1	19580	14951.7	17272.1	NA	17829.2	28186.8	14867.7	19036.5	17196.4	18681.6	16209.4	28973.9	20879.9	18733.3	18014.5	23817	17420	16121.2	21541.9	19530.3	NA	18182.8	19469.6	24532	24722.4	19071	20254.6	18932.6	27018.1	18996.7	22117.7	27006.4	19597	16709.5	17897.3	16358.4	17322.8	22376	24621.8
	142-140-88-510.69	8.512	142	NA	NA	35023.6	NA	32834.1	NA	NA	NA	42587.5	NA	41684.6	36036.1	NA	NA	46641.4	39499.6	57200.7	NA	29072.6	NA	44415.8	45502.8	32486.5	36074.3	35264.2	NA	NA	48479.4	NA	NA	NA	36941.5	101954	NA	19652.1	NA	NA	NA	44260.5	47116.2
	100-75-6-511.30	8.522	100	NA	NA	NA	NA	NA	NA	NA	NA	NA	NA	NA	82557.3	129365	126593	78090	105614	NA	108140	NA	165365	61815.7	107682	97131.5	NA	110190	97749.1	110440	96267.1	72439.7	76516.4	106494	NA	NA	67303.3	111751	103772	101033	NA	108151	141089
	174-156-20-512.12	8.535	174	32824.9	39831.6	35451.3	42317.3	28980.9	22686.8	NA	33963	NA	43977.3	33348.4	26570.7	NA	34464.5	27935.8	29351.4	NA	33462.6	26718.5	NA	NA	NA	NA	NA	NA	NA	NA	NA	NA	NA	26913.7	NA	NA	20522	30824.9	22431.4	24887.1	28341.7	22060.6	NA
	180-174-39-512.81	8.547	180	NA	NA	20008.5	20113	12088.2	NA	29690.3	NA	32070.3	NA	NA	NA	11647.2	21802.6	15829.7	NA	26933	NA	NA	30471	23402.8	NA	15555.8	25092.5	22129.6	29481	NA	28732.1	NA	29166.8	NA	21871.4	23863.6	15655	11011	11878.7	NA	11672.9	NA	23138.6
	218-117-49-514.87	8.581	117	NA	131370	51637.6	61200.3	44849.4	70618	68317.3	32195.9	97900.6	63906.1	48177.7	41357.1	63292.3	66253.9	60544	64585.3	52477.2	51880.4	40423.9	111809	40590.8	47632.7	60079	102193	83312.5	84215.5	76605.7	67458.2	60677.3	93133.1	94088.9	116763	109769	86714.4	78578.7	53712.5	47522.6	52030.4	94332.9	82463.5
	241-99-72-516.32	8.605	99	12532.9	57223.2	32501	33532.5	24549.6	12535.4	58765.4	NA	54652	32102.2	35718.5	31558	24491.4	43312.7	41928	26160.9	49242	33661.1	15948.7	42743.8	35416.5	38295	34026.5	34197	41124.8	43889.3	28625.8	44934.1	20765.4	41203.4	21330.9	46852.2	50941	32873.7	25861.8	26045.8	23916.5	29573.3	40908	43506.8
	75-74-89-517.26	8.621	74	NA	79044.4	38171.6	52704.3	30630.3	NA	NA	NA	NA	NA	NA	48386.5	124768	54080.8	38502.5	NA	127091	45974.1	NA	78711.2	NA	NA	NA	NA	NA	NA	NA	NA	NA	NA	NA	NA	59384.1	NA	NA	31184.2	NA	37975.3	52105	48459
	189-148-31-517.62	8.627	189	41123	41961.1	NA	NA	23777.7	35011.6	NA	33909.7	NA	NA	NA	NA	NA	NA	NA	NA	NA	NA	NA	NA	NA	NA	NA	NA	NA	NA	NA	NA	NA	NA	NA	NA	NA	NA	NA	NA	NA	NA	NA	NA
	148-133-21-517.62	8.627	148	NA	NA	NA	NA	NA	NA	NA	NA	NA	NA	56132.9	39807.9	57627.5	54421.3	NA	40033.6	NA	31346.9	NA	NA	NA	NA	NA	NA	NA	NA	NA	NA	NA	NA	NA	NA	46938.6	30780.3	25522.4	NA	NA	31711.2	NA	NA
	117-74-24-517.93	8.632	148	NA	NA	NA	NA	NA	NA	NA	NA	NA	NA	NA	NA	NA	NA	NA	NA	NA	NA	NA	NA	18294.5	31539.8	NA	NA	NA	49101	16003.5	36078.2	NA	33252	NA	NA	NA	NA	NA	NA	NA	NA	NA	NA
	218-100-14-518.64	8.644	218	318962	501282	230996	NA	128199	343285	352153	218766	347024	269518	NA	200157	301684	240211	132568	178308	225942	270685	133298	232216	127892	NA	228348	184301	217409	187650	177804	182431	167734	67044.8	244893	NA	168420	114468	223477	175427	206516	217695	NA	227127
	221-205-33-519.98	8.666	221	NA	NA	23641.9	25150.8	20390.4	NA	22841.4	NA	25620.3	13490.7	27819	23279.7	NA	23479	28839	23942.9	24886.4	25823.6	NA	23484.7	13955	26819.4	21201.7	NA	28610.3	NA	21548	18371	19365	NA	NA	24064.2	20847	22459	20998	22523.6	NA	26245	NA	23751.8
	292-240-83-521.15	8.686	292	NA	103798	33316.8	47095.5	28156.5	NA	73091.1	31316.5	NA	61547.7	51583.9	36660.1	65249.6	36538.1	39733.7	57508.1	66997.9	34274.1	31373.5	34135.1	28645.7	32018	28897.4	51172.5	NA	32490.6	31972.5	15082.5	30598.4	19827	NA	65723.1	55719.5	37517.6	52680.6	28410.7	29454.1	31446.5	67172.1	34383.9
	141-85-12-521.87	8.698	141	NA	NA	NA	NA	NA	NA	NA	NA	NA	NA	31340.6	NA	34141.6	NA	32198.5	NA	34977.5	NA	27254.8	37519.9	NA	NA	NA	NA	NA	NA	NA	NA	NA	NA	NA	NA	NA	NA	NA	NA	NA	NA	NA	NA
Fumaric acid	245-75-34-522.76	8.713	143	59926.7	146559	83424	112250	64250	68986.5	168549	56335.3	106979	87408.6	106589	86242.7	169695	97480.7	112211	94531	114445	93471	74505.2	113549	85803.2	71661	72846.4	145838	108955	189599	82425.5	98404.6	74369.4	253630	119798	133640	219040	129689	123055	63867.4	71814.4	83178.8	138367	115481
L-serine 2	204-100-15-526.51	8.775	204	1.70548e+07	2.05739e+07	14403869	1.63756e+07	9.91061e+06	1.45569e+07	2.12909e+07	1.38541e+07	1.78189e+07	1.76794e+07	1.49366e+07	1.18042e+07	1.85698e+07	1.60038e+07	1.21811e+07	1.37352e+07	1.77971e+07	1.5298e+07	9.81549e+06	1.68796e+07	7.68234e+06	1.22354e+07	1.20835e+07	1.23555e+07	1.48732e+07	1.10211e+07	1.18247e+07	1.21433e+07	1.17073e+07	6.41474e+06	1.5012e+07	1.36677e+07	1.29824e+07	9.85867e+06	1.4903e+07	8.86861e+06	1.25728e+07	1.07955e+07	1.35491e+07	1.10762e+07
	79-72-7-528.21	8.803	194	7763.62	15123.2	11170.5	10056.2	10236	9283.33	NA	NA	13358.6	10867.5	NA	NA	6594.1	7709.67	NA	6035.86	10534.2	5456.71	NA	11754.2	NA	6660.95	NA	NA	12221.2	8395.95	7064.43	NA	NA	7162	NA	NA	NA	NA	NA	NA	NA	NA	NA	NA
	81-80-47-529.07	8.818	199	NA	12545.4	NA	NA	3894.9	NA	6710.67	NA	5878.9	9784.86	6798.76	5211.76	16312.5	9453.52	10041	7232.43	NA	5133.71	7865.86	10919.4	7440.14	3906.29	7023.48	16008.2	9571.24	17303.2	6495.81	8082.95	5165.24	12424.3	6537.71	8308.62	10079.6	10646.7	7737.86	NA	5617.71	3785.05	12368.1	8938
	100-86-33-530.40	8.84	100	37435.2	91425.3	51517.2	41833.1	36339.1	NA	73911	48704.6	70222	NA	74169.7	60038.1	82015.1	NA	68869	NA	90306.4	70867.6	52642.6	NA	49725.3	69080.2	71896	81961	69448.6	91303.2	52499.4	NA	48242.6	78834.1	61951.4	NA	35381.9	NA	NA	NA	61396	80807.2	73606.1	NA
	75-74-42-531.33	8.856	117	54132.1	182679	83246.3	107526	65591.3	106407	144007	62410	138098	86467.5	69738.7	75962.1	99385.5	95836	76673.2	95945.7	104794	101833	52891.9	175808	74697.4	81968.8	78429.6	103915	118052	128698	91401	107347	83906.4	139485	112089	123457	143759	90489.3	102306	87407	71028.6	89435.8	145381	96665.6
	175-114-24-532.02	8.867	175	29051	41699.7	35357.1	34592.5	NA	NA	NA	NA	NA	31273.8	NA	31506.8	40004.4	41832.2	NA	42975.5	NA	36949.3	NA	42967	NA	34398.7	34216.2	NA	NA	37291.4	28266.8	42724.9	NA	NA	35042.1	NA	42615.1	37898.6	32827.1	37599	34325.6	NA	NA	NA
	218-131-33-533.67	8.895	218	208544	405766	147176	191888	168636	264795	328456	159802	331369	271578	260572	230053	330471	205428	168636	239094	432092	190826	198308	256894	150371	167235	161454	270445	280134	231109	206447	227039	188599	123589	295474	424179	354160	196815	254984	202209	133518	186866	315474	201577
Pipecolic acid 2	156-83-2-535.34	8.922	230	346672	384418	100718	202034	102318	84460.6	153954	100029	112357	270437	138771	101803	136480	179788	116745	133476	49752.4	122049	156849	108383	30488	60486.1	104836	192846	171864	44640.4	161094	38540	147726	NA	220434	146402	145411	105716	276596	36062.2	196588	92265.9	105821	57975.6
	224-83-13-537.00	8.95	224	449444	2.1436e+06	424315	393940	208589	449537	204456	NA	544384	1.21287e+06	214443	208370	374723	379133	121852	234243	379387	254095	196607	608401	199570	293659	231996	343461	410379	501626	239143	384230	189296	394440	393694	196417	NA	197686	218342	133879	209392	159550	186387	NA
	141-75-12-538.23	8.971	141	1234806	1.28181e+07	9.79366e+06	8.39772e+06	6.07462e+06	1.14262e+06	15541612	1.74523e+06	1.02286e+07	7.8853e+06	2.01142e+07	1.13083e+07	19707118	1.59508e+07	1.52831e+07	1.30121e+07	2.16497e+07	1.44601e+07	9.6816e+06	1.34392e+07	6.60404e+06	1.23377e+07	1.13173e+07	1.11093e+07	1.48692e+07	1.43933e+07	1.1452e+07	14068292	11467939	9.8621e+06	2.2078e+07	1.51281e+07	2.06372e+07	1.63874e+07	1.79268e+07	1.13382e+07	1.35502e+07	1.64113e+07	19974244	1.40758e+07
	213-95-41-539.26	8.988	213	6543.48	12611.8	10423.7	10273	6782.67	5870.95	12178.9	6341.57	11564.4	8931	NA	8410.19	NA	10150.6	10206	10437.4	11417.8	11467.9	7496.29	11559	9250.67	NA	12193.3	10058.6	14481.2	12892.5	11650.9	13312.6	11515.1	14887.9	14540.2	NA	NA	12980.6	13418.3	12119.5	13041.8	NA	18328.5	NA
	247-116-41-541.21	9.02	247	69622.5	136038	63815.5	67097.2	47111	62747.6	107198	48449.6	74450.7	102757	73452.4	58403.2	93985.3	76128.1	80751	69990.3	82870.8	75843.8	68946.5	82798	45868	65525.8	61297.3	78929.3	87105.6	79335	69111.6	69546.9	72791.4	80857.1	104427	93382.2	74526.2	83805	86692	73878	73226.4	84897.1	94286.9	77867.1
L-threonine 2	218-117-74-542.50	9.042	218	4.01573e+06	5.85781e+06	2.9442e+06	3.42175e+06	2.04502e+06	3239642	4.94858e+06	2.46277e+06	3.95635e+06	4.67845e+06	3.36027e+06	2.88637e+06	4.85751e+06	3.49257e+06	2.67487e+06	3.29921e+06	4.21006e+06	3.53512e+06	2.59246e+06	3.39518e+06	1.76331e+06	2.60532e+06	2.55756e+06	3.43582e+06	3.50507e+06	2.57292e+06	3.16122e+06	2.81445e+06	2.61589e+06	1.5713e+06	3.85895e+06	4.18696e+06	4.15698e+06	2.64935e+06	3.78364e+06	2.2568e+06	2.85688e+06	2.70374e+06	3.47422e+06	2.75102e+06
	246-72-42-545.90	9.098	246	61187.6	80954.5	72723.8	70445.1	56087.5	65863.6	73622.2	62095.6	90294.2	50227.4	68336.1	53408.9	56947	77417.4	61842.5	68952.7	65549.7	58531.7	50982.9	80513.6	58695.8	52373.4	57126.1	76467.7	73639	39728	61431.3	69179	54249.9	NA	59380.4	81529.7	77546.4	65478.5	64996.3	60861	65804.9	70915.2	62899.4	68872.6
	219-71-20-546.97	9.116	219	NA	NA	126596	95398.6	145525	NA	NA	80695.7	109379	NA	NA	NA	NA	NA	NA	NA	NA	NA	NA	NA	NA	NA	NA	NA	NA	NA	NA	NA	NA	NA	NA	NA	NA	NA	NA	NA	NA	NA	NA	NA
	245-156-56-548.22	9.137	245	47108.8	81101.6	41139.6	72769.4	37993.8	50717.2	71740.1	26495.7	72388.9	60624.7	42169.1	48972.9	NA	49459.6	65262.9	54002.3	36122.9	NA	NA	55131.5	18398.1	30776.9	44066	50176.3	38756.9	NA	39949.1	36988	36505.2	60074.1	NA	NA	NA	43708.7	68214.3	29060	33626.1	26152.2	NA	NA
	292-143-74-548.46	9.141	292	NA	NA	NA	NA	NA	NA	NA	NA	NA	NA	NA	NA	NA	NA	NA	NA	NA	NA	NA	NA	NA	NA	NA	NA	NA	NA	NA	NA	NA	NA	NA	64614.5	46814.1	29766.7	NA	NA	NA	NA	48096.7	27344
	218-174-86-549.97	9.166	174	85050.1	117870	84628.6	85339	39808	69866.3	110098	50091.4	97371.5	110231	98880.3	82688.1	148054	121119	82872.5	107761	120423	112788	68495	126390	58472.9	93118.5	88936.8	83846.1	119560	94916.6	89341.3	95957.1	82612.1	61735.4	104095	105581	93579.3	81283.4	101724	73081.3	85271.4	76847.7	96105.9	89382.7
	306-221-42-550.76	9.179	306	63571	87048.7	66104	80389.8	32185.4	69749.7	83570.3	51631.3	73536.6	71191.4	45427.2	29541.4	27140.1	52903.1	47683.1	68842.7	80342.3	49376.7	26931.4	44041.4	28889.8	27481.9	48248.2	29369	63109.7	26134	31933.7	54514.9	25679.9	25434.3	79616.3	57677.7	53936.9	37274.9	74555.1	32123	41383.4	36485.6	62682.4	47956.9
	219-131-25-552.96	9.216	219	181948	101155	179111	129094	179454	122657	80245.4	99052.2	145016	65555.5	131094	113652	109469	NA	171618	136014	NA	158742	147779	NA	110476	163086	153655	125036	169162	155363	162958	161320	120391	86140.5	75755.3	155293	NA	142625	84030	98818.1	82303.3	188573	135877	82375.5
	158-101-69-554.15	9.236	101	44187.7	90239.9	47009.8	66372	37362.6	57008.9	88851.3	40113.8	84091.9	67846.4	69547.8	60760.8	77537.7	71036	66984.5	81182.6	114597	72601.6	55404	75963.6	37248.2	64482.2	55680.1	80639.4	70157	63975.4	68810.6	75961.5	53154.4	39331.7	77517.4	96170.2	117083	73914.9	84051.4	55084.4	44071.5	61730.5	76407.4	77801.9
	218-89-9-554.96	9.249	242	NA	NA	NA	NA	NA	NA	NA	NA	NA	NA	NA	NA	NA	NA	NA	NA	NA	NA	NA	NA	NA	NA	NA	NA	NA	NA	NA	NA	NA	NA	7425.14	16089.7	NA	NA	10450	10051.1	7485.67	11912.4	NA	NA
	242-202-65-555.09	9.251	242	NA	NA	15397.8	14529.6	NA	NA	20091.8	4207	19633	NA	15127.2	NA	11833.8	16371.9	NA	11093.4	18350	16748.6	NA	16658.5	NA	NA	NA	NA	NA	NA	NA	NA	NA	NA	NA	NA	NA	NA	NA	NA	NA	NA	NA	NA
	89-79-6-555.72	9.262	213	NA	9052.52	5044.62	NA	NA	NA	7336.52	NA	5368.67	NA	12388.5	NA	NA	17980.3	9819.48	NA	10602.9	10257.9	5630.62	NA	7581.81	13960.3	NA	16599.8	17557.6	13916.9	11376.7	9978.57	NA	11597.9	23222.3	21605.6	NA	NA	NA	11884.3	NA	12627.6	14869.5	13771.2
	75-74-78-557.30	9.288	148	91288.3	100718	55567.8	68909.2	32655.7	74370.8	112765	65513.3	66417.9	68073.7	66322.6	NA	93058.4	56399.9	34713.5	55136.5	76839.1	39252.8	32579.5	65041.6	24476.9	NA	33279	51424.5	61001.7	71209.5	30769.4	43248.7	29548.9	51146.9	74272.2	59616.9	58191.7	38172	46747	31323	34850.6	39899.4	53312.2	45149.9
	103-102-2-558.24	9.304	103	85073.1	156986	76698.4	91724.3	56247.5	85192.6	114717	52968.7	110858	103348	80505.9	61610.6	102242	104989	82010.4	82698	82495.9	78032.9	64969.3	106570	61645.9	87185.8	80398.7	100879	113736	105529	114600	98798.1	77763.9	103218	114811	140238	103978	87634.6	92779.9	94362.6	93888.9	119351	95162.2	114139
	71-70-27-559.31	9.322	71	35880.9	NA	42575	NA	39214.2	38250.3	54299.9	79962	NA	NA	47441.4	NA	NA	70139.7	54899.2	NA	51698.7	NA	41074.5	57419	48161.5	NA	53416.2	59591.6	63150.9	58407.4	47518.3	56778.1	43246.2	54725.6	57837.8	69806.8	60201.6	51504.6	52417.8	47933.6	45491.3	49868.6	50601.8	58480.6
	101-75-57-560.56	9.343	101	204221	432663	227187	314387	175613	217519	402584	155039	306295	255851	365426	373261	463229	497461	382186	441669	409722	395655	257580	380673	199720	350481	349646	450923	479129	367203	363046	291854	272293	257074	453226	528311	378169	333545	397242	311548	262785	384596	396079	349892
	69-65-2-561.46	9.358	69	NA	NA	NA	NA	NA	NA	NA	NA	NA	NA	NA	NA	57000.2	NA	29648.3	22737	56805.6	NA	NA	47411.1	NA	NA	NA	NA	NA	NA	NA	NA	NA	NA	NA	NA	NA	NA	NA	NA	NA	NA	NA	NA
	221-207-38-561.90	9.365	221	NA	42672.5	NA	NA	16172.6	NA	40581.9	17349	NA	21123.9	NA	NA	NA	NA	NA	NA	NA	NA	NA	NA	NA	NA	NA	NA	NA	NA	NA	NA	NA	NA	NA	NA	NA	NA	NA	NA	NA	NA	NA	NA
	179-82-16-562.76	9.379	179	NA	NA	57008.2	33856.4	NA	NA	42471.3	8202.29	22647.9	NA	110089	38463	35517.6	50017.7	20453.3	52980.6	177618	35863	29673.5	77735.2	33819.5	36849.7	49854.4	34015.8	43807.4	26510.6	36862.4	50019.6	32567.6	32827	87646.1	48030.6	16309.6	27537.7	50500	29621.6	19871.3	57892.1	33907.1	31316.2
	156-131-85-564.02	9.4	156	12120.1	39347.7	25599.3	21728.8	92655.6	17080.2	35053.9	NA	114511	40137.4	52854.4	76028.5	24076.6	68072.7	73523.7	90054.3	30147.2	22103.9	15371.3	90575.6	24353.7	37800.7	41373.8	64541.2	25510	21616.8	46909.8	27717.5	59984.6	19717.5	21996.8	21524.4	86489.7	103378	37749.3	47695.8	23090.6	27094.5	21252.2	NA
	131-111-17-564.64	9.411	203	NA	NA	NA	NA	NA	NA	NA	NA	NA	NA	NA	NA	NA	NA	NA	NA	NA	NA	NA	NA	10831.5	14874.9	15317.5	17104.7	20344.8	13600.4	NA	25754.7	NA	9959.1	NA	27247.8	NA	20481.5	NA	16495.3	NA	15500.7	NA	NA
	174-111-46-564.81	9.414	174	NA	NA	NA	NA	NA	NA	NA	NA	NA	NA	NA	12699.4	NA	20463.4	15328.9	17221.8	14739	15669	10571.4	17657.6	NA	NA	NA	NA	NA	NA	NA	NA	NA	NA	NA	NA	NA	NA	NA	NA	NA	NA	NA	NA
	218-86-2-566.07	9.435	218	209582	412748	142623	174519	197836	264942	327956	NA	275435	252446	253870	206539	298296	199743	165042	234186	394441	167309	178222	258317	114571	161470	157132	291668	255316	NA	170548	227062	169901	NA	290209	388041	319757	174961	229323	164461	108072	194210	281189	179330
	229-113-69-566.93	9.449	229	NA	NA	NA	NA	NA	NA	NA	NA	NA	NA	8250.43	NA	NA	6926.95	7900.86	NA	8470.71	NA	NA	8885.71	NA	7538.19	NA	6711.1	8509.67	8117.9	NA	NA	NA	8218.29	2602.24	NA	7997.33	6893.52	NA	5061.67	NA	5806.86	8015.24	7554.48
	218-173-18-569.71	9.495	218	262807	519341	185497	223081	230888	359829	423370	202930	414460	379211	350089	312370	488696	259001	NA	296243	540593	254400	273717	353570	175633	209933	219007	367270	350954	304837	257980	334152	235422	191772	396007	528813	514878	266535	294782	249403	165325	228873	390259	292945
Aspartic acid 1	160-75-73-570.89	9.515	160	676386	843957	432192	454805	191051	875145	2.86368e+06	475846	883345	176758	502262	231290	2.13081e+06	344627	305351	363295	996812	244956	161741	669958	456298	255445	309666	332081	563168	2.49847e+06	189041	817022	180120	3.76089e+06	536590	548332	864606	261565	209910	323048	220316	405284	654627	1.05954e+06
	174-86-15-571.73	9.529	290	22989.5	32515	20914	25300.8	15785.3	17388.5	32691	17217.7	NA	36650.5	25617.8	23327.9	24667.1	28706.8	20301	28634.7	23171.4	23384.9	18779.8	NA	13207.3	20925.3	19744.4	35863.8	NA	19197.7	32104.2	18324	25793	13717.5	NA	NA	40580.3	24038.8	41758.9	18354.2	27614.6	24464	34164.4	25221
	218-156-7-574.70	9.578	218	261859	400706	140395	200641	165767	285992	296268	NA	273801	315610	272875	223787	NA	248452	162504	192639	357058	NA	193661	232444	102799	159846	182787	218304	229592	NA	188095	NA	168073	NA	262912	385974	286008	190255	226474	179545	NA	175490	228356	143357
	254-174-97-575.60	9.593	174	NA	26717.3	11619.3	13929	6046	NA	NA	NA	17244	NA	NA	NA	NA	NA	NA	NA	NA	NA	NA	NA	NA	NA	NA	NA	NA	NA	NA	NA	NA	NA	NA	NA	NA	NA	NA	NA	NA	NA	NA	NA
	101-83-7-576.02	9.6	129	NA	NA	NA	NA	NA	NA	NA	NA	NA	NA	NA	28451.3	NA	NA	25995.8	27689.3	NA	NA	NA	33342.8	NA	NA	NA	NA	NA	NA	NA	NA	NA	NA	NA	NA	NA	NA	NA	NA	NA	NA	NA	NA
	220-129-57-576.60	9.61	220	NA	NA	NA	NA	NA	NA	NA	NA	NA	NA	NA	NA	NA	NA	NA	NA	NA	NA	NA	NA	31753.9	NA	NA	50292.7	60821.5	NA	NA	54689.4	29162.2	NA	NA	43186.3	63723.6	49368	NA	26851.7	NA	47615.8	41993.9	36191.3
	117-75-43-577.04	9.617	117	150320	201908	NA	NA	NA	156710	98189.9	85072	NA	106817	NA	NA	NA	NA	NA	NA	NA	NA	NA	NA	NA	NA	NA	NA	NA	NA	NA	NA	NA	NA	NA	NA	NA	NA	NA	NA	NA	NA	NA	NA
	306-227-57-578.45	9.641	126	NA	25945.6	18990.8	17733.7	8613.1	NA	15006.6	NA	18742.5	18523.7	10715.4	10201.9	NA	12396.8	10356.6	6199.57	13342.4	18586.2	7115.67	NA	6213.67	16363.6	7462.52	NA	11407.1	NA	8948.71	7811.38	6868.33	NA	NA	NA	8437.76	9527.05	7921.1	7774.86	6235.48	NA	NA	7483.24
	216-133-17-579.69	9.662	216	58357.7	134938	125276	129677	86749.8	68394.7	165545	54175.1	155266	92975.9	123932	79554.3	87066	90609	82434.3	100119	144557	92134.1	58373	105992	39664	105440	88677.8	73859.3	112231	54917.8	126549	73045.3	91607.4	48818.1	86520.3	173635	75788.6	76703.7	105298	135313	142513	219475	105441	108508
	241-75-40-580.99	9.683	74	179061	291880	227486	287333	124051	167871	533806	187178	299339	237290	250590	153612	364334	208421	185512	252582	329794	230601	124735	278515	97157.6	193916	153420	227721	297405	235891	162449	215915	152951	107908	299261	271599	248893	183604	196906	138709	151327	177095	222448	200272
	218-117-45-582.31	9.705	117	134266	241636	133364	146931	100665	52764.5	132049	108992	217696	204910	278502	316482	202669	340905	284233	205458	216534	309740	265678	322464	184113	244864	292275	346556	288183	238780	153594	325648	127373	60215.7	192833	154611	275449	287488	319470	123850	103663	146285	217575	180182
	243-142-58-583.78	9.73	142	NA	31883	38303	44229	22271.5	NA	44008.7	NA	49999.6	20301.4	30278.8	22235.2	NA	31732.8	31644.4	33622.1	32684.2	31729.2	18700.7	42150.2	45949.1	30800	26571.2	39028.5	45845.9	54703	32003	46483.8	25848.6	61792.3	28481.5	43450.8	81823.4	59955.1	25383.7	39274.3	26957.5	41263.5	39219	52684.4
	189-115-64-584.82	9.747	189	NA	69490.6	48312.5	60335.2	41758.1	56719.5	83794.3	48072.3	66750.8	53501.7	71161.3	34599.7	69265.3	57398.5	40832.9	51154.3	51023	47435.7	29275.8	47360.5	26142.9	38542.5	35857.9	41206.5	69786.7	39832.6	36341	NA	35235.4	24656.6	70082.4	55405.8	36482.4	30471.2	49378.9	33529	28616.2	35965.1	60055.7	35235.3
	75-71-19-587.36	9.789	160	50982	52018.4	26170	21832.4	NA	NA	NA	28830.6	NA	21227.1	22981	15880.2	NA	16964.5	20359.9	15945.2	35556.9	16862.1	12004.3	25677.7	18558.3	13376.1	13432.1	18133.8	22614.7	72578	12737.4	28553.1	NA	102326	16811.5	NA	NA	16997.2	14965.7	20109.8	18154.3	NA	24672.5	NA
2-Piperidone	128-115-58-591.46	9.858	128	1.96946e+06	1.35929e+06	1.23997e+06	1.16688e+06	741362	1.90299e+06	1.56254e+06	2.54453e+06	1.96767e+06	1.91438e+06	621611	785545	1.37789e+06	670771	488222	788650	1.42596e+06	978376	885698	977992	264195	785833	633938	531549	926898	273535	807020	945303	753695	111075	871002	639263	509739	519906	590527	408426	973273	1.08332e+06	400204	555634
	281-221-67-592.40	9.873	327	NA	11076.5	8831.24	8520.86	9133.1	NA	12734.8	NA	8170.67	5557.29	8925.38	10905.3	NA	NA	10967.4	7285.19	14706.3	8614.05	5405.67	16364.2	18930.6	9235.57	7916.52	6327.81	7890.38	14995.4	9038.14	10100.3	7968.95	15415.4	NA	14576	16130.4	9837.48	8612.71	6586.67	6909.48	9261.33	10712.2	NA
	191-101-27-594.96	9.916	191	51594.4	65224.2	64473.4	70165.8	66375.9	91897.5	122327	NA	85953.1	NA	79446.6	49059.4	NA	69066	60036.9	68002.5	83247.6	54913.6	46886	84099.2	65678.9	60797.7	57216.4	68599.2	90920.6	NA	58522.7	82224.3	55922.7	NA	NA	NA	NA	61973.8	58612.6	59947	66343.7	76364.2	NA	NA
	218-115-35-596.27	9.938	218	NA	NA	NA	NA	182181	NA	357921	175096	276663	297695	NA	245059	447361	288908	237732	NA	608655	NA	212625	260667	NA	NA	NA	NA	NA	NA	NA	NA	NA	NA	NA	NA	NA	NA	NA	NA	NA	NA	NA	NA
	247-218-89-596.85	9.947	75	NA	NA	NA	NA	NA	NA	NA	NA	NA	NA	191731	108803	NA	164049	108170	157753	NA	126744	NA	NA	96027.5	118414	99629.9	155292	184628	148796	113236	145520	103329	152060	156947	203543	184430	134253	144903	115433	78236.3	112226	183196	155915
	71-70-38-596.85	9.948	71	36146.4	71155.6	51712.6	57337.5	53412.5	45270.6	56158.5	NA	59080.5	68925.9	NA	NA	NA	NA	NA	NA	NA	NA	NA	NA	NA	NA	NA	NA	NA	NA	NA	NA	NA	NA	NA	NA	NA	NA	NA	NA	NA	NA	NA	NA
	98-89-22-597.98	9.966	98	NA	168214	118469	125242	87183.5	29506.9	NA	32709.3	168680	105533	108698	90661.8	NA	145617	122994	99115.3	168846	123745	75626	169808	147559	129290	98282	152102	165838	187998	88947.5	175799	91935.2	188213	19703.5	176094	177589	134425	94603.9	98617	86554.5	93871	138502	182532
	255-234-58-599.24	9.987	234	136157	284228	90659.6	100703	68478.5	100602	99307.7	61948.3	111970	110159	45172.6	42735.3	66134.2	45466.6	41412	47310.7	39334.6	41979.2	35359.8	71046.7	42902.5	52531.8	50539.5	54929.5	69442	57635	58851.1	53890.5	56001	65138.9	72004.1	59771.6	39609.2	41444.8	53243	52332	52268.4	58837.2	59173.7	76943.4
	199-72-13-601.95	10.032	199	NA	NA	NA	NA	NA	NA	NA	NA	NA	NA	49976.6	NA	NA	51261.6	39445.6	30452.5	NA	35165.9	NA	29138	NA	40717.3	36469	31353.4	54990.9	32258	37506.2	44298.3	34611.8	NA	33865.6	NA	34859.2	44032.1	49472.2	33141.2	29048.9	42691.6	55058.1	43030.9
	155-139-6-603.96	10.066	229	241941	1.46846e+06	1.52071e+06	1.43149e+06	1.02934e+06	194264	394737	250791	1.83419e+06	1.0579e+06	1.21596e+06	1600387	1.62444e+06	1.91581e+06	1.33223e+06	1.63962e+06	744226	1.647e+06	1.20085e+06	1.55127e+06	703782	1.59522e+06	1.59055e+06	1.30965e+06	1.71444e+06	1.14007e+06	1.83871e+06	1.64008e+06	1.57276e+06	919380	880015	1.46518e+06	1.69721e+06	1.69176e+06	2.02696e+06	1.39663e+06	1982886	1.96578e+06	904792	1.33426e+06
Malic acid (HP)	233-133-48-606.76	10.113	245	7.87259e+06	NA	NA	NA	NA	NA	7.11151e+06	7.4364e+06	7.78075e+06	18890.1	8.35122e+06	NA	NA	7.99002e+06	7.152e+06	8.54222e+06	7.24213e+06	NA	7.40838e+06	NA	8.95501e+06	8.9309e+06	NA	9.27374e+06	8.98685e+06	NA	NA	8.6369e+06	3.18394e+06	NA	NA	9.77842e+06	NA	8.43951e+06	9.71936e+06	NA	NA	9.59139e+06	1.50603e+06	965182
	71-66-16-607.48	10.125	71	NA	296733	543836	NA	267211	286515	581322	226909	617223	NA	NA	NA	NA	NA	NA	NA	NA	NA	NA	NA	NA	NA	NA	NA	NA	NA	NA	NA	NA	NA	NA	NA	NA	NA	NA	NA	NA	NA	NA	NA
	66-64-0-609.12	10.152	66	102464	NA	98987.5	117084	NA	103701	102421	NA	98280.4	NA	99074	135359	125058	180400	122583	223321	357156	134729	103823	146361	253265	156804	NA	104443	97807	103500	105922	140143	96289	105787	136153	102931	107715	97085.6	116714	153750	94073.2	97757.6	101277	102941
	292-132-84-609.59	10.16	292	55912	55991.6	44575.1	48222.8	39445.6	56323	57884.1	NA	NA	NA	53412.5	44052.7	NA	44775.4	48912.5	58094.8	58586.5	50311.3	39815.1	42550	NA	NA	NA	NA	NA	NA	NA	NA	NA	NA	NA	NA	NA	NA	NA	NA	NA	NA	NA	NA
	79-72-38-610.78	10.18	79	61954.7	100736	41578.2	55622	47033.1	52383.3	123642	68296.8	60931.8	NA	54448.3	37765.3	42785.4	37297.2	30962.6	24464.1	28602.8	50038.9	47138.6	57834.9	28806.1	20606.1	NA	15841.8	36967.6	NA	35809.6	37397.7	39469	NA	44171.5	39098.5	26604.2	44786.1	11177.1	70459	69492.9	56101.6	30678.1	62664.4
	258-202-38-611.52	10.192	258	NA	36070	20531.9	18056.2	NA	NA	24735.2	NA	NA	NA	NA	NA	NA	NA	NA	NA	NA	NA	NA	NA	NA	NA	NA	NA	NA	NA	NA	NA	NA	NA	NA	NA	NA	NA	NA	NA	NA	NA	NA	NA
	71-70-28-612.33	10.205	71	50071	71320.7	57305.4	58343	49207.8	61287.6	64252.8	58704.4	62929.6	58299.8	NA	NA	NA	NA	NA	NA	NA	NA	NA	NA	NA	NA	84402.8	NA	110933	116197	92529.9	NA	NA	128189	142770	174570	NA	NA	NA	104876	NA	NA	158675	162466
	159-100-73-613.34	10.222	159	NA	NA	NA	NA	NA	NA	NA	NA	NA	NA	39892.7	NA	NA	46668.9	29877.2	39835.5	45390.6	38091.2	30050.3	46887.5	22591.3	37151.2	30033.3	42505.6	41151.8	NA	31186.9	37702.7	33872.4	NA	44589.5	45650.6	48532.4	NA	48739.5	28376.5	33803.1	30830	40526.1	42436.1
	218-217-99-614.81	10.247	218	293788	566377	195894	235809	229280	390131	614346	222666	337259	353092	327203	249292	377849	208138	177958	224887	403013	211701	225441	420418	123459	149112	131002	301834	264684	NA	196917	323735	NA	113633	335479	406052	420048	230570	268452	169640	NA	168077	303039	200077
	75-61-6-617.66	10.294	75	64214.5	99049.1	225866	389362	277913	83647.6	165764	200808	215047	122901	299825	185469	115804	240664	297751	186356	228644	281426	259848	311838	158837	342682	254945	201349	316472	289129	254956	310524	265118	165661	132429	219440	266726	229397	222011	131270	220861	132599	248041	207022
	133-122-1-618.28	10.305	133	152551	NA	132578	171384	158230	91110	NA	96747.3	112946	NA	128126	NA	NA	NA	NA	69125.2	106054	148710	127572	NA	98700.7	182463	148480	NA	NA	NA	NA	175127	NA	NA	NA	NA	NA	NA	NA	NA	NA	NA	NA	NA
	233-232-9-619.41	10.323	233	NA	NA	848915	510057	864825	NA	622262	267531	776218	350139	NA	705246	401608	532171	308088	799921	NA	315538	764398	NA	573918	567267	928435	684519	816259	NA	900646	NA	536584	NA	NA	962810	655132	449770	495266	578941	601330	1.15015e+06	822983	NA
	71-70-18-620.53	10.342	71	5.33682e+06	6.87003e+06	6.47301e+06	6.75667e+06	5.89528e+06	5.65502e+06	6.7866e+06	5.61466e+06	7.50216e+06	5.57662e+06	6.12108e+06	6.09373e+06	5.45763e+06	7.24267e+06	7.11831e+06	6127426	7.37709e+06	6.87978e+06	5.4897e+06	8.02534e+06	7.31216e+06	6.95816e+06	6.15263e+06	7.50974e+06	7.51622e+06	7.91692e+06	5.98858e+06	7.97962e+06	5.90556e+06	8.18087e+06	5.51081e+06	7.77444e+06	8.00438e+06	6.85993e+06	5.97235e+06	6.03776e+06	5.74019e+06	5930617	6.65299e+06	7.83699e+06
	267-179-88-621.43	10.357	293	NA	NA	NA	NA	NA	NA	NA	NA	NA	NA	NA	NA	NA	NA	NA	NA	NA	NA	NA	NA	NA	NA	NA	NA	NA	NA	NA	NA	NA	NA	8295.57	14831.7	NA	NA	12879.3	NA	NA	5521.9	NA	5085.57
	187-156-50-622.70	10.378	187	NA	NA	NA	NA	NA	NA	NA	NA	NA	NA	NA	NA	NA	NA	NA	NA	NA	NA	NA	NA	NA	NA	NA	NA	NA	NA	NA	NA	NA	NA	71275.6	71060.2	NA	NA	30038.8	NA	28795.3	65932.5	199042	187094
	115-100-87-623.02	10.384	128	1.87082e+06	5.43437e+06	3.19674e+06	3.08881e+06	2.20314e+06	1.5605e+06	4.7621e+06	3.19504e+06	3.68216e+06	4.84538e+06	5.41664e+06	4021430	6.50059e+06	5.75189e+06	4.38249e+06	4.21815e+06	5.90954e+06	5.1798e+06	3.57721e+06	5.20522e+06	1.88084e+06	4.44756e+06	3.98794e+06	3.98831e+06	5.37779e+06	3.99054e+06	4.35402e+06	4.97082e+06	4.49992e+06	2.25891e+06	8.32867e+06	5.74892e+06	6.32639e+06	5.03002e+06	7.01664e+06	3.5653e+06	5759030	5.32262e+06	5457913	4.44222e+06
	174-146-12-623.98	10.4	289	NA	25996.1	30012.6	NA	NA	NA	40758.7	21190.6	32461.6	46123.7	21250.4	22165.3	NA	29031.1	NA	21617.2	30048.3	23400.6	25762	26848.7	NA	20915.1	18884	NA	24801.6	NA	23086	20364	18626.4	NA	NA	26211.7	35234.1	21971.6	37608.3	NA	NA	NA	24130.1	NA
	305-99-15-625.02	10.417	305	NA	388206	181522	156650	133506	242964	177260	171391	144386	393795	144970	NA	273603	146942	99267	176956	192875	NA	NA	155283	103824	NA	NA	101744	146076	NA	NA	149060	120661	118285	255098	159991	127861	NA	185926	143737	NA	144322	NA	117375
	267-217-16-625.82	10.43	267	NA	NA	NA	NA	NA	NA	NA	NA	NA	NA	103041	82873	107731	120490	127961	105382	NA	84877.8	83567.4	NA	65348.2	67330.7	80299.8	219989	118536	NA	109087	78799.9	94808.8	NA	125046	95419.6	169861	147303	161749	53616	74744.5	64071.8	195299	87318.9
Aspartic acid 2	232-100-21-627.43	10.457	232	39157331	5.15109e+07	3.79564e+07	4.05418e+07	3.04532e+07	3.59286e+07	5.4244e+07	3.3695e+07	4.18107e+07	2.88767e+07	3.53706e+07	3.05806e+07	4.05687e+07	3.42795e+07	2.88767e+07	2.96642e+07	4.01896e+07	3.16314e+07	2.75581e+07	3.86519e+07	2.3291e+07	3.22296e+07	3.09918e+07	2.6942e+07	3.62127e+07	3.36787e+07	3.03689e+07	3.59661e+07	2.76502e+07	2.62483e+07	4.12872e+07	3.56101e+07	3.15397e+07	2.59653e+07	3.00173e+07	3.02613e+07	32606862	3.71751e+07	3.6002e+07	3.70219e+07
	170-156-15-628.13	10.469	170	NA	NA	NA	NA	NA	NA	NA	NA	NA	NA	221698	178485	279210	275428	192460	184349	NA	250577	188060	214180	119558	166875	152338	190520	166030	180724	125770	181653	129464	152181	NA	120226	183303	182759	164823	102609	133096	96718.2	NA	NA
	176-155-33-629.32	10.489	176	201803	NA	202391	191741	NA	183247	NA	NA	NA	180831	229136	94197	292022	137944	NA	80406.2	239808	115745	97427.7	NA	NA	92409.3	86416.6	86696.6	108021	103921	102306	90999.3	92032	71154.7	NA	91532.1	118462	69889.3	106120	NA	112363	106928	NA	119866
	185-155-58-630.21	10.504	155	NA	NA	82540.5	80672.1	74772.2	NA	NA	NA	119382	NA	55848	NA	226509	62515.5	NA	NA	53714	NA	NA	96845.6	NA	NA	NA	NA	NA	NA	NA	NA	NA	NA	NA	NA	NA	NA	NA	NA	NA	NA	NA	NA
	166-153-38-631.97	10.533	167	NA	NA	NA	NA	NA	NA	NA	NA	NA	NA	NA	9036.57	NA	14158.7	10406	NA	NA	13410.7	NA	21919.3	13199.7	13976	12243.9	12884.7	NA	20289.9	8959.57	18015.4	9072.29	18000.5	NA	19469.2	14450.2	7446.1	7682.76	9191.19	12223.9	12035.9	NA	12873.9
	349-262-86-632.93	10.549	349	NA	NA	34884.3	48339.8	31249.6	NA	NA	NA	NA	22021.6	NA	40351.8	58916.9	36106.7	53680.4	32429.2	35052.4	24810	34703.6	NA	27721	29421.5	31925.5	29503.9	38984.6	59380.1	23358.1	29504.4	34316.6	43394.4	NA	61561.6	NA	31398	41358	NA	20006.8	NA	NA	43028.9
L-pyroglutamic acid	156-75-5-634.73	10.579	156	7.12553e+07	8.13642e+07	8.0641e+07	7.87978e+07	6.07165e+07	7.75102e+07	9.71362e+07	6.8973e+07	8.10762e+07	6.43787e+07	8.4326e+07	5.76463e+07	3.36435e+07	6.8276e+07	5.16873e+07	6.18823e+07	1.03491e+08	6.47377e+07	5.18089e+07	7.59077e+07	4.73667e+07	6.72816e+07	5.50998e+07	5.73184e+07	6.64743e+07	7.71127e+07	5.16951e+07	6.96234e+07	5.05091e+07	6.72883e+07	6.32798e+07	6.0812e+07	6.3821e+07	6.04831e+07	5.73238e+07	5.5434e+07	5.81308e+07	6.10087e+07	6.03225e+07	6.81949e+07
	174-74-50-635.24	10.587	174	3.28816e+06	4.03789e+06	NA	NA	NA	2.5131e+06	3.1984e+06	NA	NA	3.59199e+06	NA	NA	NA	NA	NA	NA	NA	NA	NA	NA	NA	NA	NA	NA	NA	NA	NA	NA	NA	NA	NA	NA	NA	NA	NA	NA	NA	NA	NA	NA
	292-103-36-635.72	10.595	292	NA	NA	NA	NA	NA	NA	NA	NA	NA	NA	NA	NA	NA	NA	NA	NA	NA	NA	NA	NA	NA	NA	NA	NA	NA	NA	NA	NA	NA	NA	NA	636655	618360	498770	NA	546883	460480	562852	NA	NA
	190-116-11-636.95	10.616	205	4.92869e+06	5.98734e+06	4.1543e+06	4.19283e+06	2.49278e+06	4.739e+06	4.06039e+06	4.40445e+06	4.31406e+06	6.31762e+06	6.85578e+06	6.0777e+06	7500331	7.91848e+06	5.13168e+06	5.72313e+06	6.48778e+06	6.202e+06	4.94679e+06	6870186	5106362	5.28209e+06	5.21826e+06	5.14962e+06	6.18372e+06	5.07167e+06	5.01006e+06	6.64373e+06	4.81386e+06	5.73662e+06	5.81168e+06	3.91882e+06	4.02539e+06	5.79516e+06	5.41738e+06	3254846	3.65356e+06	3.62496e+06	4.168e+06	4.53082e+06
	185-139-40-639.43	10.657	241	NA	NA	NA	NA	NA	NA	NA	NA	NA	NA	NA	NA	NA	NA	NA	NA	NA	NA	NA	NA	40887.5	68545	58538.3	NA	72843.3	NA	65702.3	78828	61486.3	NA	104438	44736.5	NA	82951.9	75393.4	NA	60777.8	NA	76958	62543.9
	155-100-19-640.38	10.673	155	NA	3579416	1.38079e+06	1.37481e+06	743752	378206	3931048	355126	2.17654e+06	1.38215e+06	1.48099e+06	889020	3.52071e+06	1192933	1.18089e+06	641414	2.11185e+06	776122	285949	1.36036e+06	1.12904e+06	1.32988e+06	507457	854364	1.17106e+06	2.40119e+06	154046	1.31816e+06	654491	3.19586e+06	329257	805173	1.04978e+06	675755	392795	846143	398369	1.07179e+06	1525763	1.09026e+06
	232-70-70-641.89	10.698	232	211398	520473	505844	275673	322022	413880	291929	349900	406450	190946	421490	340651	201851	323412	444274	237752	371438	317656	299022	246595	413787	285296	336208	496720	545133	NA	347307	314539	222224	267417	267804	275335	243968	427635	299804	209602	414903	459346	407816	460711
	121-116-40-642.97	10.716	121	20175.2	138363	111704	118563	85275	38585.2	66264	41726.8	38569.6	74409	113543	94374.2	NA	51737.8	120414	99929.1	NA	116433	56434.5	NA	46912.6	121061	96634.2	36367.8	NA	NA	93016.8	NA	77746.4	62160	56389.6	50837.5	61516	116488	87310.6	100536	74123.2	106769	129958	56451.8
	116-70-7-643.57	10.726	116	NA	NA	111460	90671.6	31841.7	104413	NA	92725.7	NA	NA	NA	NA	229967	183607	NA	93999.1	204870	NA	NA	167876	NA	NA	103796	NA	102984	127469	NA	136536	NA	NA	NA	NA	NA	NA	NA	NA	NA	NA	NA	NA
Threonic acid	292-205-52-645.06	10.751	292	5.29363e+06	8.44534e+06	4.64023e+06	4.78965e+06	3.25752e+06	4877603	5.66311e+06	3.14604e+06	4.9585e+06	5.12039e+06	5.46006e+06	4.37166e+06	6.2764e+06	5.94638e+06	3691963	5098567	5.55345e+06	5.07676e+06	3.84898e+06	6.26492e+06	4.07959e+06	5.72222e+06	5.28753e+06	6.21759e+06	6.49757e+06	5969463	6.34146e+06	6.27258e+06	5.08243e+06	6.13642e+06	7.66034e+06	7.09352e+06	5.19777e+06	5.27688e+06	5.93548e+06	5.72052e+06	5.67334e+06	6.78988e+06	6.554e+06	6.34981e+06
	172-140-18-646.12	10.769	172	NA	12916.3	42598.1	55825.1	NA	NA	30379.2	NA	44552.1	NA	61809.8	46160	NA	NA	59944.6	50059	NA	60946.5	NA	59532.2	NA	72276.8	NA	NA	NA	60795.1	64622.2	71603.2	NA	39193.4	45302	68311.6	53683.5	50878	NA	43250.1	35678	NA	NA	59568.8
	156-116-34-646.89	10.781	156	511827	850146	439481	546074	247539	383505	595716	378578	981434	477923	510369	313054	634640	519287	257462	338645	428714	392754	240634	704122	261189	294094	276501	395183	477756	529933	244401	477992	221824	387581	276793	348014	308264	237361	302560	239653	240382	265842	330107	294116
	128-98-7-648.34	10.806	128	76252.6	124650	298230	477860	182299	62248.3	64190.4	189581	421664	99761.6	407635	250163	397826	401820	222004	394600	270239	190463	134570	532346	NA	304421	329025	311329	412381	287769	306806	375361	NA	NA	188313	292210	283024	188735	288652	310512	196052	354033	415560	329315
	117-79-7-649.78	10.83	117	257924	371958	NA	NA	NA	189695	149695	217414	386044	228973	NA	NA	NA	NA	NA	NA	NA	NA	NA	NA	NA	NA	NA	NA	NA	NA	NA	NA	NA	NA	NA	NA	NA	NA	NA	NA	NA	NA	NA	NA
	218-100-69-650.65	10.844	100	265091	466253	368130	382679	274870	345627	341449	400941	283745	408235	392020	207335	385771	224562	266429	362852	554436	428473	202835	414332	294354	328697	332656	428268	408844	371994	334040	253524	294931	303672	406823	272786	464981	278062	249600	287083	427718	332399	221234	333560
	71-69-10-651.38	10.856	71	NA	NA	NA	NA	NA	NA	NA	NA	NA	NA	NA	NA	NA	NA	NA	NA	NA	NA	NA	NA	21325.1	22453.7	20580.2	NA	20575	NA	NA	NA	NA	32104	NA	NA	NA	NA	NA	NA	NA	NA	NA	NA
	290-207-38-652.81	10.88	290	8814.9	45162.5	27136.3	29417.4	23152	17713.8	35984	NA	NA	29520.2	28212.7	24679.4	22583.5	21369	22238.9	28398.6	NA	25008.1	22020.4	28543.8	25690.4	31144.6	33527	20543.3	NA	29864.5	31955	32988.7	26735.4	NA	22698.7	NA	NA	23079.6	NA	36203.5	29865.6	36424.3	33845.9	43212.5
	103-75-82-654.66	10.911	103	NA	186452	181581	218856	142614	NA	188096	NA	211897	112482	NA	277026	283748	319879	223484	203742	NA	261158	174866	326621	131446	220425	229638	237486	189700	212561	206205	130053	157053	134271	128355	193210	222392	174614	172826	149674	146297	NA	182059	162204
	202-115-45-655.36	10.923	202	NA	NA	NA	NA	NA	NA	NA	NA	NA	NA	NA	NA	NA	NA	NA	NA	NA	NA	NA	NA	NA	NA	NA	NA	NA	NA	NA	NA	NA	NA	171596	122517	250154	169701	NA	NA	NA	NA	136134	NA
	247-129-25-655.66	10.928	247	59198.3	127609	134774	67200.8	99935.8	NA	NA	NA	NA	101371	NA	92588.7	NA	112945	70673.3	147295	NA	81853.6	133160	NA	82061.7	78465.3	211585	97722.3	NA	85108.6	120101	NA	79208.7	129775	78472	NA	95112.3	NA	143814	NA	137808	131134	91709.3	128883
	205-116-6-656.11	10.935	205	NA	NA	NA	NA	NA	NA	NA	NA	NA	NA	633838	649451	NA	NA	397017	441264	NA	903406	NA	NA	NA	NA	NA	NA	NA	NA	NA	NA	NA	NA	NA	NA	NA	NA	NA	NA	NA	NA	NA	NA
	217-129-7-657.01	10.95	217	NA	NA	NA	NA	NA	NA	NA	NA	NA	NA	NA	NA	NA	NA	NA	NA	NA	NA	NA	NA	NA	NA	NA	NA	NA	NA	NA	NA	NA	NA	NA	323227	NA	NA	NA	389404	295012	529005	NA	694391
	204-167-5-657.10	10.952	213	NA	NA	16224	15950.5	NA	NA	NA	NA	21617.9	NA	23041.1	24610.8	NA	28190.7	27030.9	15377.8	18599.7	29611.5	18245.9	18957.8	NA	NA	17253.5	NA	NA	9327.1	28525.9	16246.3	NA	5807.95	NA	NA	NA	NA	NA	NA	NA	NA	NA	NA
	72-64-0-657.61	10.96	72	NA	NA	NA	NA	NA	NA	NA	NA	NA	NA	NA	NA	NA	NA	NA	NA	NA	NA	NA	NA	70512	39512.7	NA	125941	NA	NA	88093.3	NA	90333.7	NA	NA	NA	NA	NA	NA	NA	NA	NA	NA	NA
	156-155-29-659.01	10.983	156	NA	NA	NA	NA	NA	NA	NA	NA	NA	NA	NA	151130	NA	251911	NA	239988	345743	180921	NA	323554	NA	116837	221755	216437	295091	NA	113157	113028	NA	NA	260434	205642	207684	NA	222554	NA	NA	NA	225203	300183
	117-74-21-660.21	11.003	234	3.93074e+06	5.12325e+06	3.87045e+06	4.33301e+06	3.02126e+06	3.756e+06	4410783	2.50652e+06	4.38204e+06	3.85718e+06	3.85377e+06	4.06403e+06	4.92727e+06	4.37993e+06	4.3424e+06	4.22179e+06	4.2119e+06	4.3537e+06	3.79968e+06	4.66378e+06	3.37042e+06	4.07592e+06	4.10815e+06	4.20576e+06	4.60127e+06	4.81783e+06	4.01978e+06	3.83455e+06	3.56187e+06	4.03016e+06	3.76373e+06	4.52696e+06	4.50866e+06	3.80472e+06	3.9115e+06	3.71288e+06	3.48013e+06	4.07159e+06	4.2895e+06	3.91318e+06
	185-102-20-661.03	11.017	185	326753	178655	127045	119320	108821	373254	271005	248164	120200	250387	117290	113606	NA	102240	NA	83016.9	136802	100061	NA	NA	NA	107312	89493.7	NA	NA	85605.6	105931	NA	NA	67124.6	165810	NA	NA	NA	105612	78568	129734	99484.3	143737	NA
	266-204-46-662.07	11.035	252	NA	NA	NA	NA	NA	NA	NA	NA	NA	NA	NA	4984.33	25068.2	10115.3	8610.81	14385.2	NA	5482.52	6392.52	12344.9	10008.9	4471.86	7606.1	11141.9	8880.71	13630.4	5454.05	9732.86	4188.67	10171.5	11026.5	13016.8	22182.8	12896.5	8249.86	7925.43	6162.9	6269	13138.2	13953.3
	100-84-23-663.18	11.053	100	773857	957191	675604	677668	444208	873537	NA	741154	608306	1288081	647114	516199	955373	561496	464865	671418	1.24059e+06	1296205	547802	742068	387442	612466	634850	670190	677332	535180	710352	466879	623741	395230	1.27494e+06	500367	1.22362e+06	508542	608122	452570	858851	654611	332171	544774
	218-217-99-664.11	11.069	218	318740	1.07776e+06	651916	375012	538596	557280	NA	514941	554140	492018	571961	439257	329510	476059	477148	385184	515524	460282	407056	370362	NA	525984	539671	NA	642946	NA	664910	698494	439679	NA	595173	629492	NA	541590	606039	586863	803469	881188	459983	1.039e+06
	189-138-5-664.99	11.083	331	NA	NA	NA	NA	NA	NA	NA	NA	NA	NA	NA	9946.9	NA	13377.4	NA	9363.9	NA	11398.1	6592	NA	NA	NA	NA	NA	NA	NA	NA	NA	NA	NA	NA	NA	NA	NA	NA	NA	NA	NA	NA	NA
	142-66-1-666.18	11.103	142	395120	2.15528e+06	531728	582552	508347	523435	621450	292423	410791	979187	391956	229831	446723	336488	153214	204956	326275	200710	145586	357806	323738	585469	247670	181311	356004	427390	244426	608521	227163	459539	324340	270222	208944	183746	240282	292208	319525	360744	378421	585849
	227-74-25-668.94	11.149	227	486982	5.37417e+06	2.88087e+06	3225745	1.93251e+06	1.64572e+06	2.15762e+06	1.66171e+06	2.93567e+06	5.43287e+06	1.29473e+06	1.81308e+06	2.53822e+06	2.1344e+06	1.22935e+06	1.08598e+06	1.76396e+06	2.29783e+06	1.57065e+06	1.92387e+06	509987	2.19787e+06	1.19438e+06	1.12027e+06	1.59478e+06	1.17573e+06	1.62677e+06	1.37503e+06	1.29271e+06	1.01671e+06	724753	980484	949753	1.0851e+06	1.39373e+06	829468	1.71737e+06	1.45569e+06	798138	976568
	257-188-92-672.04	11.201	188	466467	321128	376043	453208	370025	217320	271834	382659	349297	393280	381173	348668	339345	366022	387945	327654	396867	481159	411732	452720	102103	471843	366773	380035	469389	328122	NA	413777	397705	191682	335143	411668	444997	330969	NA	293548	NA	NA	306850	340369
	221-133-64-673.03	11.217	221	NA	110039	90323	69876	70701.8	NA	59264	NA	65438.2	38412.5	163756	102198	73137.9	122748	135064	88208.4	75064.1	99137.9	47398.6	71943.6	64446.7	130725	117612	87149.3	134181	97383.4	129580	99189.4	107682	91451.8	99347.9	133107	93699.7	129476	136410	142234	101763	213113	225163	140579
	217-83-23-674.16	11.236	217	NA	161419	95312.5	NA	NA	35379.1	64444.8	NA	55916.4	69446.6	138477	71187.3	NA	43159.6	129115	110679	NA	83623.7	62910	NA	79407.3	108817	98626.6	127132	198773	125876	128217	121577	70780.4	139695	84603.8	88693.6	97339.2	137808	41862.4	NA	67559.5	141801	148518	NA
	71-70-5-674.91	11.249	71	75218.3	294149	199679	170912	100037	197343	236224	134922	153159	82040.3	NA	NA	NA	NA	NA	NA	NA	NA	NA	NA	NA	NA	NA	NA	NA	NA	NA	NA	NA	NA	NA	NA	NA	NA	NA	NA	NA	NA	NA	NA
	75-74-39-675.80	11.263	74	766697	670158	483163	632533	313122	832497	981864	786614	586051	432412	642945	296034	1.4819e+06	524629	468233	480553	988697	497214	354108	833047	412663	439887	403142	538722	640156	1.05049e+06	307464	649214	349347	963696	617412	505989	848624	478910	395417	414710	384045	404299	579699	662555
	332-230-43-676.59	11.276	332	NA	163054	89195.4	109135	63023.7	NA	NA	95271.3	137650	NA	102629	97490.5	NA	101848	64102.9	72086.5	83468.1	90906.2	NA	95756.5	51959.2	101510	88958.6	56660.7	111301	110911	101470	122408	74329.3	95208.1	129249	71846.8	79935.4	75262	79802.7	68459.9	86812	86908	102413	121878
	85-82-4-677.50	11.292	85	NA	122133	85851	96099.6	51072.5	124298	126327	91569.2	132434	79255.4	49021.5	50661.3	130636	92945.9	49081.9	51774	NA	79200	63449.5	112848	40894.8	51203	25306.3	53970	95248.2	60554	48633.8	57876.9	45139.4	50885	NA	54063.5	87937.3	45894.9	44202.7	39746	NA	NA	NA	54302.4
	156-149-8-678.74	11.312	156	NA	NA	NA	NA	NA	NA	NA	NA	NA	NA	563608	417073	NA	519646	430805	445704	NA	487026	294815	NA	405062	472353	454369	NA	563971	NA	354306	585540	314689	608213	NA	430800	500916	375545	359431	390084	275851	436469	528962	515220
	142-70-56-679.86	11.331	70	578098	322647	410555	415821	318796	513182	485120	1.04935e+06	529474	531913	186650	258786	274975	201620	182121	212677	410182	374667	337703	285385	93491.3	284238	199796	176709	268054	NA	288679	197957	241786	NA	220134	210929	192158	157045	203305	140114	321745	382030	112513	153667
	241-72-12-681.40	11.357	241	99796.5	497925	272069	225512	159586	90834.2	392806	132313	281212	291483	533106	310330	724305	460208	356167	288879	453865	379989	206536	346213	177284	383158	330092	287780	444250	432562	364288	478345	328933	360248	911010	396498	501976	510148	578983	274469	369931	420553	612963	429646
L-glutamic acid 2	246-128-22-682.74	11.379	248	1.69611e+06	2.1569e+06	1.57932e+06	1.71232e+06	1.05302e+06	1.59094e+06	2.00108e+06	1.37565e+06	1840564	1.58955e+06	1.33955e+06	1.2473e+06	1.8128e+06	1.49787e+06	1.13124e+06	1.30056e+06	1610498	1.39943e+06	1.047e+06	1.66468e+06	886550	1.23671e+06	1.26958e+06	1.05719e+06	1.53724e+06	1.36379e+06	1.24237e+06	1.35428e+06	1.10509e+06	1.20119e+06	1.38969e+06	1.27166e+06	1222256	1.03597e+06	1.14196e+06	1.12492e+06	1.1355e+06	1.23659e+06	1.27646e+06	1.2965e+06
	188-159-12-685.88	11.431	188	1015894	925683	905321	1.21422e+06	833357	704107	942630	1.09626e+06	881781	1.51591e+06	1.00064e+06	1.07305e+06	NA	NA	1.04144e+06	NA	NA	1.49806e+06	1.33537e+06	1.16353e+06	NA	NA	NA	NA	NA	NA	NA	NA	NA	NA	NA	NA	NA	NA	NA	NA	NA	NA	NA	NA
	303-172-43-685.88	11.431	333	NA	NA	NA	NA	NA	NA	NA	NA	NA	NA	NA	NA	NA	NA	NA	NA	NA	NA	NA	NA	NA	NA	NA	NA	NA	NA	NA	NA	NA	NA	58573.2	40853.1	NA	NA	NA	35209.9	NA	30946.5	45535.7	41841.6
	117-75-66-687.03	11.451	232	471259	842505	712585	726913	627401	770839	680630	675071	496814	400411	1.05769e+06	868151	1.20637e+06	1.26023e+06	961894	1.11148e+06	800505	851988	715438	612021	574723	746753	938703	1.18322e+06	1.34045e+06	848965	852461	663078	504007	639405	1.08397e+06	1.14495e+06	682076	977477	852187	657252	806871	959916	671990	881162
	328-79-11-688.32	11.472	328	NA	3.85055e+06	91087.8	167085	NA	7400.24	NA	NA	9737.57	16514.6	NA	NA	NA	NA	NA	NA	NA	NA	NA	NA	NA	NA	NA	NA	NA	NA	NA	NA	NA	NA	NA	NA	NA	NA	NA	NA	NA	NA	NA	NA
	191-129-17-690.27	11.505	217	48615.1	131891	51735.5	56394.9	36628.8	48193.7	NA	40540.8	98246.1	64381.8	78057.5	59412.1	NA	72481.3	53331.5	57101.5	72178.1	61796.9	51632.3	115394	116861	61657.3	56122.5	102079	86932.9	NA	58689.4	120997	60658.4	114046	75343.5	93329.8	96022.9	77539.8	85843.1	79971.1	59051.4	70410.8	95025.4	70789.5
	218-192-63-691.56	11.526	192	398024	607962	319070	327192	205183	336604	504034	243220	399620	610404	518424	497291	705751	516089	360459	482023	637015	561501	421493	388229	329606	402087	385052	937613	503851	578280	592343	414245	479933	393632	622955	731191	1.0516e+06	591827	781027	374454	441848	341503	617969	522969
	267-223-63-692.67	11.545	223	6442.81	71520	49998.2	51499.7	33605.1	7647.71	154437	9073.9	119550	26903.1	59033.1	43941.5	22253.8	65132.9	64838.6	52575.7	146820	51646.5	22744	145691	142297	56067.8	48028.6	132049	91641.8	164176	38227.2	150896	28222	168206	14035.8	146915	159227	62193.1	38710	49296.1	22931	53378.7	72500.4	126617
	246-84-49-693.81	11.563	246	501664	720801	518362	451721	363482	409861	542356	404711	452283	602572	331791	430069	484169	524970	281336	325718	373458	484845	412509	378456	216974	346874	430856	452591	344472	504857	441345	500429	407181	413035	485731	477656	443957	367807	365463	376246	400532	321861	474075	394050
	245-217-58-694.53	11.576	245	NA	NA	25951.1	28194.3	20575.2	NA	44058.3	20861	28350.4	39760.2	23149.5	29563	48021	27342.1	22381.7	24772.6	NA	30122.5	29535.4	34528	20400.9	NA	NA	27973	31119.6	29719.1	NA	27139.7	NA	27525.8	NA	NA	NA	23910.5	28075.6	21256.7	23444.9	27567.2	24939.2	25537.2
	334-261-25-696.33	11.606	334	NA	NA	80580.7	73320.2	47979.3	NA	97179.3	59167.9	82939.5	71368.7	NA	56093.3	81102.2	98862.4	83381.5	NA	68557.8	66495.1	88122.7	77354.6	48217.8	66305.6	55306.8	47775.4	86910.2	76829.7	60561.1	91241.1	62490.2	68616.8	47054.2	93400	39244	58739.7	87751.2	44117.4	41651.6	62006.4	82543.2	NA
	103-75-45-697.94	11.632	103	202205	290558	202865	240566	144204	219880	310213	138778	259603	209669	324393	250287	521133	325526	303319	306058	340004	361591	271948	318796	220922	290970	307437	269850	352506	418239	305504	284871	296904	358028	291443	338550	365958	268521	305222	251234	233658	258646	296877	356120
	174-156-35-698.83	11.647	174	25993.3	NA	NA	41419.8	NA	52906.3	40420.1	NA	27152.4	NA	90587.1	46993.5	66462.7	58326.8	49422.4	56805.3	92456.5	66395.2	38655.3	50150.9	37832.3	45460	60272.9	60751.4	NA	NA	24223.1	NA	44620.8	NA	NA	NA	NA	54351	45521.1	46320.3	60034.7	NA	48498.7	NA
	274-84-68-699.86	11.664	274	NA	NA	NA	NA	NA	NA	NA	NA	NA	NA	NA	NA	NA	NA	NA	NA	NA	NA	NA	NA	NA	NA	NA	NA	NA	NA	NA	NA	NA	NA	32267.5	30045.3	31882	NA	25518.7	NA	NA	25433.6	27286.9	15096.3
	103-89-10-702.24	11.704	103	179763	267848	153839	190466	120494	174501	305150	121119	205663	177200	215797	197420	332767	218484	205157	200434	244457	224948	173367	247492	159040	175644	176179	279188	242618	255206	194737	242558	182108	219746	239493	251598	286019	200080	236860	160426	156732	177581	226488	213488
	231-149-58-702.90	11.715	231	NA	NA	NA	NA	NA	NA	NA	NA	NA	NA	NA	NA	NA	NA	NA	NA	NA	NA	NA	NA	NA	NA	NA	NA	NA	NA	NA	NA	NA	NA	158533	225923	NA	182822	NA	161582	NA	NA	NA	188699
	243-75-21-703.77	11.73	243	1.38054e+06	1.21745e+06	685766	723419	433654	1.5524e+06	236311	1.23498e+06	1.13759e+06	2.11437e+06	371878	755282	1.59626e+06	801609	353415	638456	241333	753063	704128	752549	398107	727805	667946	577960	808353	548480	870721	814558	650981	391433	488295	430242	555506	669741	693459	367898	720560	444366	315747	550640
	117-75-14-704.82	11.747	117	488917	787548	708167	663453	464357	586494	522815	678348	523158	641049	688361	NA	613632	NA	NA	NA	841007	732099	NA	706728	542121	614790	628818	759157	692996	682430	624797	497447	NA	607494	705542	585823	750464	NA	427160	NA	NA	NA	NA	669680
	275-100-50-705.82	11.764	275	359994	889726	395182	393923	267743	366235	383872	307849	419364	704202	351424	313270	424667	359857	225342	326163	360173	364771	259550	375618	218861	334775	315804	272455	326144	351599	324927	382123	276848	321154	330853	306619	368481	374483	402457	291545	404197	299610	381096	316956
	288-79-28-707.00	11.783	288	15270.5	25050.9	NA	NA	NA	11447.6	NA	15678.1	NA	44837.7	NA	NA	NA	NA	NA	NA	NA	NA	NA	NA	NA	NA	NA	NA	NA	NA	NA	NA	NA	NA	NA	NA	NA	NA	NA	NA	NA	NA	NA	NA
	188-146-7-707.03	11.784	188	NA	NA	321703	703072	349457	NA	379664	NA	308034	NA	541053	392007	NA	279868	335527	475620	296911	NA	540987	354490	216589	346462	571143	306631	406114	341489	577580	397723	302002	231307	371969	321773	660896	284707	325825	280323	406738	418148	279144	353852
	342-327-47-709.24	11.821	327	15477	75316	59963.4	54769.8	34799.7	12909	38603.4	15096.4	72436.3	34207.4	72800.6	51713.7	91734	64503.7	58921	47324	40774	56878.9	29572.1	52156.6	34826	57781.3	51806.7	45924.6	65535.9	59637.1	50219.7	72139.9	38639.6	67082	33594.6	45619	58114.8	64050.8	54850	45615.4	39900.7	64963.9	63891.3	64840.3
	261-140-12-710.07	11.834	261	122667	132899	NA	75336.9	33151.4	85876.1	88638	67117.3	66604.5	135700	69001.6	59796.4	186044	83020.7	48365.4	59344	92108.4	69346.2	59325	79335.5	NA	49687.1	NA	59954.6	60110.5	60866.5	NA	79919.2	39899.5	NA	93929.1	54656.5	65373.3	66443.8	82166.8	34029.7	62636	41893	NA	46897.5
	307-156-55-710.92	11.849	307	84824.7	75310.8	45495.7	NA	50977.2	66573.8	NA	70815.1	NA	73138.2	99215.2	118516	173401	118562	104586	111457	120856	94280.2	89487.1	90889.8	70771.9	71283.7	78220.6	111868	72695	92301.4	87174.9	85682.4	84460.2	86988.5	92887	NA	NA	98254.7	110177	78539.5	68017.6	102834	103066	85367.6
	275-155-61-712.10	11.868	275	NA	NA	NA	NA	NA	NA	NA	NA	NA	NA	NA	NA	NA	NA	NA	NA	NA	NA	NA	NA	NA	NA	NA	NA	NA	NA	NA	NA	NA	NA	NA	75556.9	NA	64728.2	NA	NA	71906.8	63587.7	NA	61773.9
L-asparagine 2	116-75-22-713.11	11.885	231	1.91581e+07	1.93098e+07	1.6061e+07	1.64355e+07	1.1228e+07	1.9218e+07	2.30176e+07	1.96474e+07	1.78123e+07	2.0186e+07	1.7816e+07	1.47973e+07	2.216e+07	1.77448e+07	1.56886e+07	1.61834e+07	2.15505e+07	1.83489e+07	16401323	19883399	1.11699e+07	1.46725e+07	1.39194e+07	1.55699e+07	1.66968e+07	1.75898e+07	1.34127e+07	1.59428e+07	1.40194e+07	1.35957e+07	NA	NA	NA	1.58093e+07	1.62988e+07	1.24104e+07	1.54745e+07	1.39147e+07	1.50854e+07	NA
	75-74-65-714.36	11.906	74	5.248e+06	NA	NA	NA	NA	5027175	3.0659e+06	5.64526e+06	NA	5520115	NA	NA	NA	NA	NA	NA	NA	NA	NA	NA	NA	NA	NA	NA	NA	NA	NA	NA	NA	NA	NA	NA	NA	NA	NA	NA	NA	NA	NA	NA
	328-79-57-714.86	11.914	328	NA	83338	19672.9	20858.7	13198.5	19556.3	16041.3	14476.4	22558	34579.3	22883.1	20043	NA	24223	18193.7	17361.9	13467.4	19889.5	14617.4	16925.5	8139.76	19914.3	17494.2	13128.9	20171.6	23129.8	16139.8	20993.2	13140.9	22722.5	19627.8	13670.1	14620	19660.6	16556.9	12299.8	13126.8	14133.7	22974	17890.2
	79-65-6-716.09	11.935	79	35037	NA	NA	NA	NA	59492.8	24370.2	91270.1	NA	22156.2	NA	NA	NA	NA	NA	NA	NA	NA	NA	NA	NA	NA	NA	NA	NA	NA	NA	NA	NA	NA	NA	NA	NA	NA	NA	NA	NA	NA	NA	NA
	307-230-83-716.55	11.942	307	NA	69187.8	29557.9	48668.5	NA	48320.9	NA	NA	54370.3	47060.6	37004.7	34051.3	NA	40545.2	30850.2	39447	48031.1	39729.1	35363	50797.1	NA	15937.6	37234	NA	NA	NA	38016.8	39745.1	36111.3	33291.8	55750.4	44341	48629.1	33368.5	43478.7	NA	30581.9	22597.7	47097	39423.6
	114-79-3-717.88	11.965	114	NA	130524	119030	100055	101818	NA	NA	NA	NA	NA	123029	65893.4	99228.1	81999.6	79409.5	86489.1	126294	140944	63030.3	NA	111707	126915	128433	115472	128311	123013	124396	80760.6	110632	78808.6	136684	95931.9	NA	85853.9	71329.7	114214	142459	127337	75021.9	NA
	221-207-33-718.55	11.976	221	NA	30503.2	25082	NA	21735.6	9427.57	NA	11818	NA	19032.7	25452.7	23115.5	NA	13684.4	27594.8	NA	NA	25597.9	NA	NA	NA	26147.5	20066.1	NA	20025	NA	22694.5	NA	17599	NA	NA	NA	NA	24723.3	19618.6	17889	NA	24239.5	26857.8	NA
	204-129-17-718.86	11.981	204	NA	NA	NA	NA	NA	NA	NA	NA	NA	NA	NA	NA	NA	NA	NA	NA	NA	NA	NA	NA	447795	NA	NA	576177	NA	474869	NA	512955	NA	444810	NA	NA	NA	NA	NA	NA	NA	NA	NA	NA
	295-77-93-719.95	11.999	77	NA	NA	NA	NA	NA	NA	NA	NA	NA	NA	33065.9	18039.3	NA	20349.8	21852	22121.4	36078.2	31061.6	17118.2	NA	33532.6	27864	NA	39136.9	NA	NA	30707.5	NA	19135.9	NA	25867.3	NA	34689.3	23364.5	19263.1	NA	28039.5	25349.2	19838.7	NA
	243-75-18-721.60	12.027	75	378798	642443	369824	590868	407435	256094	494725	590838	473353	407105	548661	306968	517315	389625	351610	416374	538258	600256	337375	591923	450106	518102	543881	620235	630169	545882	516473	398799	416626	527504	489810	420959	523254	438749	339777	316602	607461	533366	346783	563621
	275-75-84-724.60	12.077	75	484874	801761	468721	777037	411472	306069	706870	708350	641075	365953	553496	393928	611480	500667	348858	543976	747689	590634	393834	625448	481802	520129	551429	919630	768379	535641	524187	366922	551859	474537	601041	450374	537294	403410	344241	337840	800318	551313	356322	567220
	231-204-66-725.44	12.091	231	94489.9	76831.4	72191.2	76701.3	69493.9	114495	124227	NA	98317.8	43397.3	143273	103986	NA	106396	110588	109433	105292	139788	129907	131920	110491	144983	171090	129072	159953	164172	133727	183426	127002	184501	130096	189614	112790	138488	120281	103692	114810	101380	108917	102881
	299-241-76-726.39	12.106	299	50917.7	NA	24574.9	47240.9	31448.1	56071.9	52711	54498.9	37477	96407.7	NA	41872.7	90264.3	38558.5	18984	NA	49169.7	NA	18140.1	19544.1	NA	NA	11197.7	10438	9386.57	8308.76	11518.4	11101.2	14298.3	6343.19	NA	NA	NA	NA	NA	NA	NA	NA	NA	NA
	207-187-25-727.45	12.124	207	NA	NA	NA	NA	NA	NA	NA	NA	NA	NA	NA	14510.5	NA	11225.9	17101.5	10368.8	NA	10210	NA	NA	NA	NA	NA	NA	NA	NA	NA	NA	NA	NA	NA	NA	NA	15282.1	13998.2	15743.9	8073.29	21584.5	22944.5	17889.1
	246-72-8-727.80	12.13	246	NA	212475	195229	179721	NA	170452	202868	155895	NA	218846	NA	NA	NA	NA	NA	NA	NA	NA	NA	NA	NA	NA	NA	NA	NA	NA	NA	NA	NA	NA	NA	NA	NA	NA	NA	NA	NA	NA	NA	NA
	146-94-15-728.59	12.143	212	NA	NA	13603.3	14815.3	9382.95	NA	21618.8	NA	20998.8	24415.9	17166	11708.8	NA	NA	12380.6	11591.8	NA	10828.9	NA	NA	NA	NA	NA	NA	NA	NA	NA	NA	NA	NA	7176.86	NA	NA	10530.9	10142.6	NA	10192.7	NA	23767.4	NA
	204-203-27-730.22	12.17	204	156495	272780	505260	382702	289825	105778	375266	347575	342683	196258	450398	301935	232955	386355	292637	340237	646777	320648	249727	489318	263333	385607	415280	329601	447130	273608	423453	377120	329389	264772	395651	411456	267270	352433	431429	298896	344269	486826	382210	367534
	227-203-29-731.04	12.184	227	NA	NA	300232	340615	236130	NA	NA	232111	315049	478444	128017	288127	NA	289320	168273	213596	NA	331817	319627	286054	78812.1	276307	237992	NA	271660	90021.2	326077	NA	265906	NA	NA	243740	184396	183447	313636	NA	355781	277484	NA	NA
	348-79-25-731.61	12.194	348	NA	NA	NA	NA	NA	NA	NA	NA	NA	NA	NA	107344	167689	191219	NA	136372	NA	139710	160616	NA	NA	NA	NA	NA	NA	NA	NA	NA	NA	NA	NA	NA	NA	NA	NA	NA	NA	NA	NA	NA
	75-74-37-732.97	12.216	75	2.76827e+06	2.39103e+06	1516432	1.95412e+06	1.08909e+06	2.35121e+06	1.10849e+06	2.76171e+06	2.5132e+06	1.73319e+06	1.33858e+06	1.00173e+06	3.28524e+06	1.42761e+06	1.01458e+06	1.66264e+06	1.3294e+06	1.62752e+06	1057288	2.0775e+06	1.31889e+06	1.32316e+06	1.46792e+06	1697024	1.641e+06	2.27603e+06	1.29807e+06	1.53327e+06	1.10503e+06	1.90629e+06	1.27106e+06	1.28576e+06	1.75981e+06	1.23109e+06	1.02672e+06	962001	1.58724e+06	1.45737e+06	908042	1.65565e+06
	331-172-28-733.50	12.225	331	NA	NA	NA	NA	NA	NA	NA	NA	NA	NA	44890.8	41076.5	NA	NA	NA	35947	28359.5	40683.9	NA	NA	NA	NA	NA	NA	NA	NA	NA	NA	NA	NA	NA	NA	NA	NA	NA	NA	NA	NA	NA	NA
alpha-Aminoadipic acid	260-128-49-734.37	12.239	128	696456	1.29943e+06	681166	741102	351639	571074	591997	558132	NA	569306	557936	518641	952898	698985	629106	463536	549588	479400	390503	764824	479691	498499	590582	564656	521120	654459	477215	621067	451744	585985	499863	464110	527230	550456	544504	415718	388697	532343	537166	523680
	246-205-17-735.77	12.263	246	546674	458179	493616	409823	450088	505229	490646	475419	309643	484168	255475	388885	386532	545609	351064	302401	255971	516689	452729	291582	201030	247876	446900	503242	397428	523860	465891	504440	476759	474192	462629	414170	285381	266911	260192	408476	352303	402083	551508	433683
	70-69-8-736.63	12.277	70	52288.1	100078	78260	91327.6	68391.6	55772.5	84604.3	84271.7	73278.8	109420	89071	69956	NA	75313	74800.6	68754.5	74385.3	77791.4	60192.6	77875.7	67574	73278.8	80684.9	78647.4	88799.6	NA	66743.6	103772	58915	155802	69550	86444.5	65990.8	84347.7	72279	61489.3	69880.5	78225.1	77820.1	104056
	117-89-4-737.74	12.296	117	185054	256946	148869	161074	94101.3	NA	220723	147054	150079	158035	193456	138688	323035	165712	172755	203253	NA	178690	144337	187175	121995	141311	171347	184664	178061	255242	151130	186092	159471	233461	199558	198143	216259	198254	171463	120746	139177	141183	181289	174189
	230-95-72-738.76	12.313	230	401999	980923	399980	336106	122513	943395	803437	370250	358456	418010	390431	149105	1.33235e+06	259651	161705	505209	835431	173240	124579	420468	241177	131509	253512	214552	237627	865830	118737	453057	126304	918285	443345	243524	392555	272610	136506	228470	131342	259821	359436	411262
	273-202-7-740.05	12.334	273	NA	120227	87490.9	95056	52156.7	NA	106681	26252.4	91408.4	72775	93189.8	78133.7	126686	109100	61387.1	80578.9	102101	79491.7	58352.2	93453.9	51946.6	83467.1	74065.6	66088.2	91188.7	86024.8	75833.6	93377	73585.6	83645.2	74357.3	61497.4	67231.6	74738.4	77775.8	55083.1	64593.1	60041.9	85017.3	73448
	303-207-22-741.23	12.354	303	32255.1	65430.2	NA	NA	NA	26349.5	32302.1	NA	38390.5	NA	NA	NA	NA	NA	NA	NA	NA	NA	NA	NA	NA	NA	NA	NA	NA	NA	NA	NA	NA	NA	NA	NA	NA	NA	NA	NA	NA	NA	NA	NA
	227-203-83-741.78	12.363	203	792885	844002	1.02478e+06	1052357	734949	639561	182524	1.04996e+06	1.05546e+06	1.30099e+06	451711	816797	755181	875726	525244	639291	283039	998313	972940	760555	242578	745356	716750	632194	806021	392034	987994	541538	758087	248788	357201	628292	584909	565268	858445	487083	1.09362e+06	791780	216440	454993
	173-72-25-743.01	12.384	173	284730	199730	160844	162942	85523.7	255051	74826.5	220520	254525	196332	NA	104222	356111	141974	NA	128571	104948	144219	NA	215870	74787.4	NA	109111	127246	160041	200228	NA	164630	NA	NA	89443.8	136490	170458	108771	113246	NA	136183	116640	75328.8	144198
	205-117-37-744.90	12.415	205	367951	616004	356071	415190	262713	362701	540164	275942	459385	311150	374441	373566	669583	387462	347905	407598	467015	426657	365477	518144	306483	415796	411787	397348	470573	535144	450379	406919	368422	405639	411773	441157	436604	341517	399983	402405	381967	512604	458847	453194
	72-68-0-747.25	12.454	72	NA	NA	NA	NA	NA	NA	NA	NA	NA	NA	125256	95577.7	147062	135211	60746.5	NA	208427	163936	NA	153754	134656	109615	NA	151031	123562	153939	78123.8	23700.2	105807	151599	NA	NA	158031	NA	85840.9	NA	NA	139894	61158.7	132928
Putrescine	174-128-13-749.19	12.486	174	610150	599633	640760	678466	501508	568066	1.15742e+06	584188	744912	1.01405e+06	839550	829269	1.05137e+06	1.1057e+06	724187	819485	1.09112e+06	1.01507e+06	751942	996966	377533	900502	729990	801463	934374	627124	983089	777615	839432	436170	1.29634e+06	1.36027e+06	1.40941e+06	802109	1.6534e+06	489294	883141	873049	1.00402e+06	631606
Ribonic acid	103-75-35-751.40	12.523	292	852304	1.29776e+06	740737	835605	522703	806437	1.21482e+06	686451	892202	823791	923302	791772	1.61786e+06	940661	732382	804256	1.01213e+06	913043	787872	1.02637e+06	531771	765212	796276	787852	934970	1.01345e+06	801339	822087	723496	806191	1.06157e+06	878353	955199	801382	919131	701396	749336	1.00004e+06	934450	809120
	231-142-48-753.20	12.553	231	84247.9	246122	140587	101992	90932	NA	240784	NA	223766	56415.5	NA	NA	NA	NA	NA	NA	NA	NA	NA	NA	NA	NA	NA	NA	NA	NA	NA	NA	NA	NA	NA	260272	NA	NA	NA	123755	171763	144426	NA	267701
	72-70-10-753.77	12.563	72	NA	NA	NA	NA	NA	NA	NA	NA	NA	NA	144638	NA	122829	111014	NA	93697.2	NA	NA	62496.3	NA	NA	NA	NA	NA	NA	NA	NA	NA	NA	NA	NA	NA	NA	NA	NA	NA	NA	NA	NA	NA
	70-68-3-753.82	12.564	70	117806	NA	20942.4	34732.5	NA	126448	NA	145271	NA	60944.3	NA	NA	NA	NA	NA	NA	NA	NA	NA	NA	NA	NA	NA	NA	NA	NA	NA	NA	NA	NA	NA	NA	NA	NA	NA	NA	NA	NA	NA	NA
	217-191-6-754.44	12.574	217	NA	NA	NA	NA	NA	NA	NA	NA	NA	NA	NA	NA	NA	NA	NA	NA	NA	NA	NA	NA	3.8085e+06	NA	NA	4.23018e+06	NA	3.87919e+06	NA	3.6415e+06	NA	3.5174e+06	NA	NA	NA	NA	NA	NA	NA	NA	NA	NA
	292-103-79-756.38	12.606	292	468072	691499	408762	437969	321376	425094	648558	338007	501442	348497	442871	388226	754175	478009	402481	407031	507206	480529	368360	529173	NA	397816	410295	511519	502675	542623	469635	425854	418383	423872	591052	550138	634680	441688	553019	382719	433708	514308	533397	460798
	357-299-89-757.66	12.628	299	106260	783994	298741	303870	266755	137602	189235	133405	218603	711446	271455	238412	340228	326546	261099	201973	154455	292699	247057	204298	95934.9	283356	228797	158777	NA	183097	233487	168665	269325	172861	197139	159244	146037	284544	328678	202101	332344	236942	NA	214816
	197-138-69-759.32	12.655	138	NA	NA	NA	NA	NA	NA	NA	NA	NA	NA	NA	NA	NA	NA	NA	NA	NA	NA	NA	NA	NA	6666.9	8725.38	NA	9172.62	NA	7222.62	8365.14	NA	NA	NA	9249.38	9923.67	NA	10673.7	NA	9013.81	NA	NA	6398.76
	217-75-15-760.18	12.67	74	485378	669765	572332	786584	520738	184914	524635	557709	603567	490504	831357	618322	740233	671755	564462	579880	1.06867e+06	633245	464680	954139	603964	658000	718633	737726	715647	601761	704490	621136	533803	580570	737526	730966	601450	584947	640923	505252	655700	769827	639308	740037
	273-84-60-760.86	12.681	273	NA	NA	NA	NA	NA	NA	NA	NA	NA	NA	25174.9	27463.1	NA	NA	22752	21055.1	NA	22858.5	20994	NA	15613.4	18271.7	22232.5	NA	26945.9	NA	20715.9	NA	20634.3	NA	20558.2	NA	NA	20520.7	NA	17722.3	15454.8	18889.6	21541	NA
	324-292-91-762.31	12.705	292	117413	176098	117353	112223	94114.7	112745	169308	84964.2	123982	99612.5	119716	100240	179214	140362	117819	115527	135635	145590	103787	137976	82178.1	125146	116263	115949	132449	141186	138408	114028	136664	117749	NA	150407	162980	143583	150761	123467	134836	159588	166102	130210
	171-159-28-763.39	12.723	171	22203.6	NA	29552.9	30768.2	27665	NA	NA	15997.2	NA	41635.4	NA	NA	NA	NA	NA	NA	NA	NA	NA	NA	NA	NA	NA	NA	NA	NA	NA	NA	NA	NA	NA	NA	NA	NA	NA	NA	NA	NA	NA	NA
	331-171-76-763.43	12.724	331	NA	108537	NA	NA	NA	187716	137357	151957	92291.2	159247	82163	59352.4	358650	73526.4	45667.2	64386.7	100606	77057.8	65195	83786	40764.2	NA	54576.5	55848.8	71832.5	NA	53620.6	81948.7	51537.5	NA	90581.5	45631.1	96286.4	73753	63483.1	36888.2	NA	NA	60862.9	61922.3
	292-287-35-765.60	12.76	292	181381	201762	159269	164033	142854	160681	193454	128366	175396	139630	140095	146193	266710	190519	140138	150348	159277	199664	150973	183533	87981.8	163833	146406	150256	154926	156249	199516	159328	182296	119580	169731	155948	217681	167212	187250	126210	181221	173893	146934	153722
	319-173-17-767.02	12.784	319	NA	NA	NA	NA	NA	NA	NA	NA	NA	NA	92681.2	173544	153660	NA	159178	NA	129663	NA	NA	163952	NA	NA	NA	NA	NA	NA	NA	NA	NA	NA	NA	NA	NA	NA	NA	NA	NA	NA	NA	NA
	245-218-21-768.23	12.804	245	NA	NA	NA	NA	NA	NA	NA	NA	NA	NA	NA	NA	NA	NA	NA	NA	NA	NA	NA	NA	NA	1.14869e+07	NA	NA	1.29446e+07	NA	1.16737e+07	1.25821e+07	NA	NA	NA	1.28463e+07	1.32317e+07	1.15035e+07	1.169e+07	NA	1.25525e+07	1.20171e+07	NA	NA
L-gulatimine 3	156-155-38-768.76	12.813	155	1.82518e+07	1.71411e+07	1.67993e+07	1.74736e+07	1.28398e+07	1.67388e+07	9.18453e+06	1.79767e+07	1.82877e+07	1.76772e+07	1.1496e+07	1.38599e+07	1.85465e+07	1.61135e+07	1.20807e+07	1.4482e+07	1.06192e+07	7.96995e+06	1.44957e+07	1.68634e+07	1.00233e+07	1.36727e+07	1.42123e+07	1.40798e+07	1.54669e+07	1.5061e+07	1.39813e+07	1.50451e+07	1.34445e+07	11979872	1.09556e+07	1.52234e+07	15740182	1.36675e+07	1.39302e+07	1.22494e+07	7.82618e+06	1.44929e+07	9.21182e+06	1.35138e+07
	199-79-9-769.83	12.83	287	NA	NA	NA	NA	NA	NA	NA	NA	NA	NA	41532.6	25314.3	NA	NA	29803.9	23200.2	31836.7	NA	18360	NA	22025	31675.7	27815.7	25445.4	28739.7	20292	28172.1	31692.6	28842.1	26956.7	29707	25018.9	19940.1	32052.8	30181.4	28423.1	NA	25778.3	38088	30426.2
	79-65-7-771.40	12.857	79	37729.5	NA	14691.2	19883.4	NA	60334.4	NA	30719.5	NA	47751.3	27711.7	NA	NA	24470.6	NA	56745	NA	39029.5	NA	30991.5	NA	NA	NA	NA	NA	NA	NA	NA	NA	NA	NA	NA	NA	NA	NA	NA	NA	NA	NA	NA
	299-244-10-771.88	12.865	299	47242.8	65782.2	40349.6	35973.6	26003.9	34755	57059.6	49457.8	46075.1	51406.1	46393.2	29314.4	43769.2	41285.9	20244.3	26998.6	39760.2	37231	30603.8	37512.8	16611	32185.4	29425	26373	34305.1	25444.7	27583	26591.4	26988.7	21113.8	64657.9	34033.9	28065	35386.6	43241.5	19419.6	36432.3	37261.6	37949	33147.3
	179-79-20-773.74	12.896	179	NA	NA	NA	NA	NA	NA	NA	NA	NA	NA	27544	NA	NA	26436.6	NA	19550.2	66562	NA	NA	26644	NA	NA	NA	NA	NA	NA	NA	NA	NA	NA	NA	NA	NA	NA	NA	NA	NA	NA	NA	NA
	276-86-27-775.89	12.931	276	NA	NA	NA	NA	NA	NA	NA	NA	NA	NA	82803.9	82172	NA	99007.5	117163	88623	109685	130827	114202	82306.8	46360.3	78683.1	72193.3	65471.7	84726.6	79216.6	97443	69388.1	65346.5	50009	98229	118841	220422	123600	113744	62929	85600.4	89999	95036.7	65003
	217-74-31-777.03	12.95	217	443398	1.81992e+06	415744	409992	156640	477875	448272	138876	591923	2.66963e+06	291492	206420	1.08316e+06	485736	383056	289220	420415	315670	344650	354097	95348.7	269215	372490	214318	317859	432486	199000	290885	247242	311740	280205	458349	738674	261249	254649	192826	162488	277413	414118	319018
	191-126-64-777.83	12.964	126	NA	NA	NA	NA	NA	NA	NA	NA	NA	NA	NA	NA	NA	60491.7	NA	NA	38385.1	64106.9	46998.5	NA	NA	28503.6	NA	52847.9	23763.8	64580.9	55995.1	62070.2	36744.5	50258.2	36647.3	NA	NA	35521	30873.9	NA	51984.4	56420.4	NA	NA
	72-62-0-778.51	12.975	72	84216.7	NA	63499	125289	68592.7	128200	NA	NA	127853	106227	95580.9	87605.7	106764	NA	71437.5	65343	NA	120687	66488.3	117102	NA	NA	NA	NA	NA	NA	NA	NA	NA	NA	132894	83565.1	113428	NA	NA	55930.6	NA	NA	56304.8	NA
	117-75-52-780.28	13.005	333	196218	362614	177462	197522	129485	196875	254265	132515	212469	249439	189808	176350	328115	204434	185220	172868	200138	206476	169311	229450	131988	186018	194998	180028	216293	210325	183481	181501	160964	195787	202717	208555	212420	162983	200673	161164	198436	190890	196453	190435
	217-204-20-781.06	13.018	217	NA	1.75888e+06	NA	NA	202601	429409	557136	158918	569583	2.94122e+06	367866	204720	NA	361926	232561	274297	503748	262470	258563	440725	228332	273742	324294	320370	347012	466159	197772	364957	228216	387197	413291	417714	458228	252569	259117	218958	176953	287020	483311	405041
	324-179-86-781.75	13.029	324	NA	29115.7	25165	NA	15655.7	NA	NA	NA	22421.5	34243.4	48388.8	40187.9	NA	47373.9	27004.5	36399.6	51368.1	NA	37058.6	NA	NA	NA	NA	NA	NA	NA	NA	NA	NA	NA	48388.3	28393.3	22799	NA	42820.7	23696.2	31650.9	23753.9	NA	24944.8
	156-128-30-782.62	13.044	156	NA	NA	NA	NA	NA	NA	NA	NA	NA	NA	NA	19667	39232	27354.9	16938.7	NA	NA	23373.7	19873.1	NA	NA	NA	19258.2	NA	24166.2	NA	18721.7	NA	18656.4	NA	NA	NA	NA	NA	NA	NA	NA	NA	NA	NA
	72-68-2-782.70	13.045	72	79679	115537	NA	99104.1	NA	109442	94674.8	NA	157704	132187	NA	NA	NA	NA	NA	NA	NA	NA	NA	NA	NA	NA	NA	NA	NA	NA	NA	NA	NA	NA	NA	NA	NA	NA	NA	NA	NA	NA	NA	NA
	204-72-14-785.84	13.097	204	809544	2.15154e+06	774493	776593	NA	858830	911447	495962	785428	4.81917e+06	530349	NA	1.18917e+06	810693	537461	564058	799328	662497	613410	680818	NA	517498	725046	NA	590613	764498	603246	546039	611513	605113	896262	668177	729969	586372	577583	497943	NA	635691	846770	524712
Citric acid	273-75-15-787.00	13.117	273	1.03999e+07	1.80874e+06	8820149	8.58477e+06	9.90657e+06	1.1409e+07	1.23677e+07	1.30116e+07	1.08075e+07	1318116	1.39692e+07	1.20582e+07	1.32367e+07	1.51792e+07	1.36813e+07	1.44059e+07	1.27593e+07	1.37224e+07	1.35701e+07	1.38763e+07	1.36336e+07	1.42067e+07	1.58292e+07	1.78115e+07	1.6149e+07	1.59255e+07	1.57131e+07	1.56758e+07	1.57274e+07	1.80162e+07	1.72946e+07	1.75942e+07	1.88204e+07	1.93086e+07	17153889	1.66498e+07	1.74988e+07	1.9002e+07	1.8251e+07	1.87699e+07
	142-128-14-787.80	13.13	142	181778	172992	157048	149042	118493	309104	435915	326414	270414	188041	NA	NA	204861	NA	NA	111951	268150	143695	124303	150622	NA	NA	NA	NA	NA	NA	NA	NA	NA	NA	NA	NA	NA	NA	NA	NA	NA	NA	NA	NA
	269-268-79-788.22	13.137	359	NA	NA	NA	NA	NA	NA	NA	NA	NA	NA	NA	NA	NA	NA	NA	NA	NA	NA	NA	NA	NA	NA	NA	NA	NA	NA	NA	NA	NA	NA	13554.6	NA	9657.24	10539.5	NA	NA	NA	10556.3	NA	10092.8
	79-78-6-788.39	13.14	128	NA	NA	NA	NA	NA	NA	NA	NA	NA	NA	38651.9	11673.7	NA	13097	12064.5	NA	NA	NA	NA	13636.8	12468.7	19691.4	NA	NA	16557.1	13576.8	17829.8	19451.5	NA	NA	NA	NA	NA	NA	NA	NA	NA	NA	NA	NA
	174-72-8-790.51	13.175	174	188636	467625	190804	213601	120283	151921	NA	154873	168740	409984	191384	173114	200821	225165	141950	125775	226363	218591	140876	181128	61802.7	178696	119759	120124	158377	118581	145506	132283	140662	87499.9	267616	145549	118551	144525	200149	NA	153992	142504	189416	120745
	364-72-80-791.52	13.192	364	NA	NA	NA	NA	NA	NA	NA	NA	NA	NA	NA	NA	75074.3	NA	64397.5	80973.5	NA	NA	36468.3	53594.2	NA	NA	NA	NA	NA	NA	NA	NA	NA	NA	NA	NA	NA	NA	NA	NA	NA	NA	NA	NA
Citrulline 2	157-142-43-792.48	13.208	256	971678	457611	385635	398885	333910	1.01272e+06	551470	1.71303e+06	496762	871676	212711	321831	423537	206634	190409	232475	416060	384322	406297	250742	85369	321484	222061	147936	267802	92236.1	359237	213029	307846	54123.1	219828	182451	139691	162435	244016	141195	365629	369520	125368	152291
	307-119-30-793.35	13.222	307	NA	NA	NA	NA	NA	NA	NA	NA	NA	NA	NA	NA	NA	NA	NA	NA	NA	NA	NA	NA	NA	NA	NA	21708.4	NA	26637.6	22071.8	22902	21658	27865	NA	NA	NA	NA	NA	NA	NA	NA	NA	NA
	217-117-57-794.33	13.239	117	109643	171453	75147.9	111097	64614.9	114340	117483	52572.1	106645	203853	65897.1	75965	129717	81015.3	76917	76469.9	82308.9	74815.2	63416.6	92560.6	73102.2	53426.8	64085.7	90081	84843.3	89578.4	62395.8	85973.8	63244.2	54288.9	65059.6	109336	84632.6	51190.9	88210.4	64339.7	85680.1	76848.1	55096.8	51097.4
	204-191-64-795.32	13.255	221	NA	NA	46523.7	38663.4	33169.3	20827.5	78230	19353.1	42699.1	31411.6	36923.7	34464.6	29270	NA	40346	34747.2	81049.7	35922.5	NA	75084.3	52534.3	40232.5	33348.2	54749.4	39181	68074.9	36132.9	64086.1	33978	49149.1	NA	93471.3	55641	NA	39516.1	30223.4	33043.8	NA	NA	37559.9
	156-155-84-795.98	13.266	155	123398	108469	90253.4	93618	76471.5	166839	NA	177857	93089.9	139385	NA	NA	NA	NA	NA	NA	NA	NA	NA	NA	NA	NA	NA	NA	NA	NA	NA	NA	NA	NA	NA	NA	NA	NA	NA	NA	NA	NA	NA	NA
	72-67-1-797.32	13.289	72	NA	NA	NA	NA	NA	NA	NA	NA	NA	NA	126370	113440	118565	125446	123924	NA	107437	119807	NA	115139	NA	NA	NA	133157	123128	203156	NA	85315.5	NA	136283	NA	NA	NA	NA	NA	NA	NA	NA	NA	NA
	112-70-51-799.94	13.332	112	53213	NA	29320.2	86704.6	58888.7	17389.5	57223.5	65632	40057.5	31314	NA	36400.6	46823.3	NA	NA	37601.5	NA	44015.1	NA	44328	NA	NA	47407.7	51749.8	NA	38028.5	44519	59719.6	NA	31152	36732.6	NA	46257.5	34685.3	52128.5	NA	48317.3	NA	36867.4	NA
	157-146-68-800.84	13.347	146	68207.7	122902	80278.3	73883.8	54520.3	51752.4	86462.9	54189.9	70806.7	57148	69503	76122.4	100909	92189.1	74103.2	59129.7	61761.3	84026.3	63002	108202	60957.8	72825.6	72530.1	97024.3	85001.3	97941	75960.6	101338	74030.6	87676.9	79784.7	94339	77994.9	82201.8	74670.5	64037.1	66645.5	88223.7	97045.1	80259.9
	103-75-36-802.89	13.381	103	273331	467824	271305	338296	193763	259983	392556	220868	430369	390215	325739	308214	611173	383342	306240	329798	379118	361800	284301	515580	331990	338862	323089	410170	515714	511663	339284	471636	301674	307372	506594	501606	481420	397049	464067	285583	327921	392980	492291	443844
	67-65-7-803.73	13.396	67	NA	106422	34807.8	63048.4	61629.2	NA	43892.4	44097	41661.5	77193.1	48941	51321	37036.7	66722.1	51938.2	53308.8	49623.9	89527.9	52164	41605	48318.8	49478.8	NA	34403.3	NA	42340	47334	NA	38232.5	52610	33947.8	56456.6	49263.2	49094.3	37643.7	47584.8	50889.6	47280	46474.5	NA
	204-157-82-804.93	13.415	204	261265	723706	238657	279131	204925	206472	400368	200701	351838	831772	175567	233653	403102	287880	182067	162645	304902	261830	246914	322589	NA	63208.9	NA	NA	NA	NA	239504	NA	224063	NA	236717	NA	NA	167041	176178	56927.5	213082	234547	221704	NA
	245-72-15-805.98	13.433	245	64217.7	121201	72592.8	79478.5	48153.1	60987.6	91371.6	47243.8	78813.1	87120.2	81675.4	82761.8	145245	105686	79750.2	88278.4	91927	100871	76016	103350	NA	NA	94596.5	95603.2	114181	92298.8	91685.6	88099.7	83287.3	109342	112337	110065	82102.3	101483	119784	NA	111949	114156	110052	NA
	285-132-64-807.02	13.45	132	25975.8	47898.9	50533.1	41481.8	42252.1	29233	55736	23994.7	41230.8	40302.3	41869.7	39003.9	37171.3	51994	50472	42620.1	66958	54827.3	41233.2	42460.1	43634.4	50303.9	44873.4	37553.8	52901.7	52829.4	42664.1	41534.1	41229.6	42681.4	45573.4	45625	63837.9	40571.9	49606	37987.4	44958.3	41742.8	48507.1	48248.3
Fructose MX1	103-74-13-810.84	13.514	217	5.99025e+06	1.02324e+07	6.1718e+06	7.22459e+06	3.78202e+06	6.40698e+06	8.9389e+06	3.56541e+06	7.30864e+06	8.11229e+06	7.19009e+06	6486270	9.3019e+06	9.04066e+06	7.19168e+06	7.66397e+06	9.26238e+06	7.86559e+06	5.64231e+06	8.04383e+06	5.42827e+06	7.75331e+06	7.69615e+06	8.65322e+06	8.7437e+06	9.70393e+06	7.13739e+06	7.49705e+06	7.50417e+06	8.41704e+06	8.54194e+06	9.84001e+06	1.01845e+07	7.35534e+06	9.00461e+06	6.23496e+06	6.21237e+06	6.45038e+06	9.5417e+06	7614448
	324-179-83-811.49	13.525	324	26496.6	30976.9	NA	NA	12391.1	21749.9	NA	20664.9	19976.5	26801	NA	NA	NA	NA	NA	NA	NA	NA	NA	NA	NA	NA	NA	NA	NA	NA	NA	NA	NA	NA	46201.2	NA	NA	38009.4	NA	NA	23130.9	26518	37324	NA
	241-79-59-812.17	13.536	241	NA	NA	NA	NA	NA	NA	NA	NA	NA	NA	31901	30633.6	69471.9	NA	30611.1	NA	40541.3	NA	NA	NA	NA	NA	NA	NA	NA	NA	NA	NA	NA	NA	NA	NA	NA	NA	NA	NA	NA	NA	NA	NA
	205-157-22-813.86	13.564	275	1.13014e+06	1.95179e+06	982921	1143572	677810	1.06531e+06	1551026	821849	1.15687e+06	1.42487e+06	1.1531e+06	1.08017e+06	1.99817e+06	1.26334e+06	1.13027e+06	1.06869e+06	1.25629e+06	1.27952e+06	1.05405e+06	1.37476e+06	728541	1.04741e+06	1.104e+06	1.16316e+06	1.35501e+06	1.42917e+06	1.15982e+06	1.10836e+06	1.04731e+06	1.12334e+06	1.50407e+06	1.3164e+06	1.5467e+06	1.24733e+06	1.40787e+06	1.00396e+06	1.09011e+06	1.30451e+06	1.42247e+06	1.12216e+06
Fructose MX2	103-74-14-815.50	13.592	103	6.86784e+06	1.24941e+07	7.38092e+06	8.81318e+06	4.4809e+06	7.42046e+06	1.16449e+07	4.61994e+06	9.1465e+06	9.18284e+06	8771392	7709548	1.07673e+07	1.13157e+07	8.90431e+06	8.91787e+06	1.24218e+07	9.52502e+06	6.67761e+06	1.07952e+07	6.84037e+06	9.28068e+06	8.99153e+06	1.0954e+07	1.08352e+07	1.26017e+07	8.31444e+06	9.47952e+06	8.63516e+06	1.0972e+07	10706672	12796736	1.32276e+07	8.88938e+06	1.06797e+07	7.60828e+06	7.25561e+06	7.84888e+06	1.22574e+07	9.53098e+06
	306-159-4-819.60	13.66	306	NA	NA	NA	NA	NA	NA	NA	NA	NA	NA	NA	NA	237449	122145	96489	NA	117868	92972.2	NA	NA	NA	NA	NA	NA	NA	NA	NA	NA	NA	NA	NA	NA	NA	NA	NA	NA	NA	NA	NA	NA
	220-203-31-820.99	13.683	220	64441	233158	71992.2	78955.9	53639.3	60849.6	90819.9	43131.1	78729.9	99743.4	82103.8	80130	118579	99952.1	81618.4	78188.1	79357.1	91889.3	72928.1	108579	71281	76569.5	81992.3	245275	135308	122555	107677	114654	87386.6	89478.5	169939	411046	338078	111736	NA	87893.8	97343.9	122766	135894	151088
	264-79-21-822.00	13.7	264	105407	NA	NA	NA	NA	104243	37044.3	104689	NA	90930	NA	NA	NA	NA	NA	NA	NA	NA	NA	NA	NA	NA	NA	NA	NA	NA	NA	NA	NA	NA	NA	NA	NA	NA	NA	NA	NA	NA	NA	NA
	204-191-42-822.86	13.714	192	292962	914884	311571	313389	208579	348963	338291	186556	397259	1.08518e+06	260569	238022	477686	328318	271654	253335	349688	253008	242707	322293	NA	247370	300096	279903	345085	370048	263581	321282	274766	296020	351842	441088	450356	283465	362818	221340	278112	274157	373020	333137
D-glucose MX1 (HP)	319-205-77-824.21	13.737	320	2.68068e+06	321892	1.09091e+06	2.911e+06	1.93029e+06	2.71139e+06	2.82269e+06	2.29612e+06	3.07926e+06	4.1152e+06	2.11375e+06	227082	4.06453e+06	2.39533e+06	1.74009e+06	2.77625e+06	3.02916e+06	678198	1.53457e+06	3.3869e+06	2.36718e+06	2.86965e+06	949106	2.45464e+06	3.0553e+06	2.12085e+06	797755	2.83091e+06	2.80776e+06	357227	2.4195e+06	4.42338e+06	1.18062e+06	2.05664e+06	4.62001e+06	77099.6	1.23431e+06	2.53062e+06	2.70415e+06	2.82496e+06
	359-273-89-826.53	13.776	273	NA	NA	40289	46180.5	41363.1	34503.7	66005.5	26928.9	45096.4	NA	51123.7	52606.1	NA	56702.2	34198.4	41648.3	56777.2	44304.9	32177.2	49381	38318.5	41470.3	36536.6	40261.1	56132.3	46133.9	35371	44488.6	37122.5	38405.8	40306.8	NA	38619.1	34779.6	47342.1	33390.7	32666	28551.8	50202.8	43329.7
	72-64-0-829.32	13.822	72	NA	NA	NA	NA	NA	NA	NA	NA	NA	NA	NA	NA	164495	NA	NA	77926	107711	NA	90452	118008	NA	NA	NA	NA	NA	NA	NA	NA	NA	NA	160523	133501	NA	89364	100983	NA	114256	NA	NA	NA
	273-272-27-831.07	13.851	363	NA	43299	25120.8	32780.2	32284.7	20648.4	38559.5	11868.9	27620.4	29171.6	26351.3	35945.5	24985.3	39148.3	25004	29894.4	31098.2	30547.9	19699.1	31776.8	19247.2	25117.5	23356.9	16833.4	27018.8	29604.1	21679.5	23727.1	26231.9	18855.8	21026.2	34427.3	22963.3	16672.9	35535.7	25174.3	23101.7	21172.9	36169	24989.1
D-glucose MX2 (HP)	319-205-85-834.45	13.907	160	630103	90730.9	318119	726020	487265	725211	696678	607639	809447	1.08193e+06	557383	68714.6	1.14965e+06	621942	473709	706260	789388	187994	414073	929696	635828	732280	283256	671695	789291	621192	248248	747224	747780	101434	604482	1.24589e+06	365170	524668	1.33703e+06	21202.8	337998	664150	739583	713576
	71-69-18-835.43	13.924	71	8.37998e+06	1.05042e+07	1.04397e+07	1.09369e+07	9.52522e+06	8.92396e+06	1.05837e+07	8.836e+06	1.2005e+07	8.98347e+06	1.00234e+07	9.94074e+06	8.85502e+06	1.17834e+07	1.16327e+07	9.77638e+06	1.17983e+07	1.12827e+07	8.87617e+06	1.27515e+07	1.15806e+07	1.12551e+07	9898196	1.18088e+07	1.18757e+07	1.23358e+07	9.81691e+06	1.24919e+07	9.60761e+06	1.3095e+07	8.52724e+06	1.17272e+07	1.21385e+07	1.12753e+07	9.41856e+06	9.7433e+06	9.39794e+06	9.65448e+06	1.06539e+07	1.22755e+07
	380-290-81-836.37	13.94	290	6051.38	NA	15623.5	15839.3	20683.1	10761	23771.8	12400.7	15072.2	NA	17472.2	19234.3	11189.6	20020.6	15547.4	16142.2	16765.4	17251.5	17137.6	15891.2	10103.5	15182.4	13118.9	8942.86	11192.1	11261	10277.3	12301.1	10812	10603.7	11949.8	9551.95	NA	11436.3	10941.4	9534	10402.2	10554.3	14282.5	10530.6
	275-234-78-837.91	13.965	234	NA	NA	NA	NA	NA	NA	NA	NA	NA	NA	NA	NA	NA	NA	NA	NA	NA	NA	NA	NA	NA	NA	NA	NA	NA	NA	NA	NA	NA	NA	11110.8	13830.8	10585.6	NA	19175.4	NA	NA	NA	9045.52	NA
L-lysine	174-156-30-839.39	13.99	174	330556	330192	292396	304572	195015	248647	522602	468717	389529	465848	366236	345383	353957	337510	239619	231901	488545	437691	295352	255819	156029	341826	240397	251686	302753	194651	291161	295646	286001	149096	304810	248089	286941	198650	325793	266209	309058	385053	249474	305207
	71-69-16-840.21	14.003	71	NA	108237	37082.8	38788.1	35145.6	NA	NA	39902	45437	116243	NA	40530.8	36793.4	40454.5	42202.8	36703.2	NA	49261.2	NA	NA	43310.6	46908.3	37342.3	41864.3	46855.1	44738.3	NA	43005.6	41885.2	46328	40592.8	48703.9	45468.3	NA	39910	37979.7	NA	37662.5	48014	45659.2
	359-153-16-840.77	14.013	359	29956.8	49611.8	NA	NA	NA	20093.1	NA	27934.9	NA	35324	NA	NA	NA	NA	NA	NA	NA	NA	NA	NA	NA	NA	NA	NA	NA	NA	NA	NA	NA	NA	NA	NA	NA	NA	NA	NA	NA	NA	NA	NA
Sorbitol	323-207-73-842.40	14.04	323	2.21275e+06	NA	3.02405e+06	2.67018e+06	2.81898e+06	2.61476e+06	3.71619e+06	2.6881e+06	3.17256e+06	NA	2.80821e+06	2.46171e+06	2.27299e+06	3.28703e+06	2.91158e+06	2.91125e+06	3.05242e+06	2.9828e+06	2.95272e+06	2.77293e+06	1.86067e+06	3.14299e+06	3.12748e+06	2.23351e+06	3.0623e+06	2.84872e+06	2.9966e+06	3.17862e+06	3006969	3.0089e+06	3662322	2.97014e+06	2941838	2.92792e+06	2.89039e+06	2.4291e+06	2764822	3.19449e+06	2.98326e+06	3.10217e+06
	333-143-30-843.19	14.053	393	45609.9	NA	31269.9	33419.6	22588.4	36480.6	58233.2	36318.2	36496.3	NA	37223.6	15787.3	30099.7	17278.1	14920.8	14671	25517.9	15881.7	15104.2	20530.1	12678.1	19086.2	19218.6	17913.3	22749.3	23686.2	22572.4	19879.1	21846	18953.6	65121.3	23437.5	18923.5	17325.2	NA	20554.8	21043.8	38287.2	37888.5	21401.3
	72-60-0-843.77	14.063	288	4317.71	8360.05	NA	NA	6488.86	5679.86	NA	NA	NA	NA	NA	NA	NA	NA	NA	NA	NA	NA	NA	NA	NA	NA	NA	NA	NA	NA	NA	NA	NA	NA	NA	NA	NA	NA	NA	NA	NA	NA	NA	NA
	277-159-41-845.36	14.089	292	31935	54632.9	25700.1	25682.3	22621	35575.2	29284.6	25631.3	31148	43600.9	15599.1	24203.3	30700	45233.9	31250.5	32752.4	18743.1	40077.9	31249	32540.6	17271	30195.9	30880	34656	28626.5	26990	39083.6	24116.8	49239.5	23007.6	55796.2	19387.6	20792.5	39207	27811	28872	43136.6	44551	44049.6	29940.7
	157-143-78-846.75	14.113	157	NA	NA	22568.9	NA	NA	NA	NA	NA	23146.8	27417.2	15459	15183.1	31197.2	25460	13982	15148.3	27355.8	25972.5	17365.2	29397.4	7855.19	13387.6	17499.6	15404.9	21861.6	18120.6	19664.8	22060.6	15769.3	15060	22618.9	34636.3	34837.7	14925.2	31928.1	13509.1	17698.4	11928.3	NA	19387.4
	202-72-51-847.22	14.12	261	NA	NA	NA	NA	NA	NA	NA	NA	NA	NA	4749.33	NA	NA	NA	NA	4682.67	6042.57	5550.81	5740.38	NA	NA	NA	NA	NA	NA	NA	NA	NA	NA	NA	NA	NA	NA	NA	NA	NA	NA	NA	NA	NA
	244-205-86-848.78	14.146	244	44909.5	108168	83087.8	74458.9	41277.4	37519.1	109246	35408.8	75695.7	127179	148654	121698	133862	166737	134043	145460	200067	187257	112153	157004	112613	211362	133384	84771.1	192384	128779	130034	150480	136681	208373	148594	131263	102014	175719	182844	159384	178350	167400	309655	341566
L-tyrosine	218-100-9-849.77	14.163	280	68889.4	100246	52717.4	62616.1	38127.1	56359.1	102856	63891.9	64393	105709	128857	81506.1	161609	97803.8	63247.8	90511.7	145485	132642	75314.7	89630	48425.4	58283	64242.2	92253	88951.6	78953	109774	68752	79321	59593	85540.4	104322	94919	69252	105028	58437.7	78622.6	58934.8	88980.7	71132.1
	319-205-5-850.47	14.175	320	98482.5	147354	70540.8	NA	66939.2	107902	89855.3	44710.8	108595	82464.9	NA	NA	NA	NA	NA	NA	NA	NA	NA	NA	NA	NA	NA	100414	106437	120958	NA	129696	NA	123563	NA	NA	NA	NA	NA	NA	NA	NA	NA	NA
	332-205-13-851.59	14.193	332	38002.3	65669.9	90406.3	51525.3	35278.6	36407.3	64127.3	27616.1	58364.5	75907.6	97316	68749.5	80339	89740.7	73902.9	92116	106420	94998.3	84762.1	80081.6	84091.8	188838	158873	86446.7	190853	125454	144405	132164	137602	207181	254181	NA	NA	170917	195686	168545	184626	242813	306460	304409
	103-74-52-852.92	14.215	129	NA	NA	123281	106824	78046.2	NA	120528	NA	89317.1	NA	211949	129892	129038	152767	104055	144266	271384	124855	92625.8	177091	102777	141379	229178	131034	173534	137617	168403	171872	206238	137164	244873	245765	166274	129820	388623	188769	201973	225990	269373	140922
	361-117-56-854.79	14.247	361	52416	117947	62189.1	67460	46126.7	NA	80149	39440.5	81243.1	NA	70130.3	57520.3	96307.9	70881.6	48263.5	62708.8	100734	63120.6	46054.4	86010.4	62366.3	74081.2	79906.8	68303.2	90757.3	NA	75090.4	88597.8	78166.7	NA	100663	NA	NA	64027.4	121186	73412.1	83068.8	75586.1	96342.7	NA
	217-117-3-855.50	14.258	217	598141	1.12189e+06	337666	423690	243796	605634	552716	431943	447227	1.065e+06	NA	383883	779918	477120	347741	380871	NA	420596	328362	459507	399516	540876	NA	316571	488671	563109	459449	463375	416940	458512	NA	666091	612036	392168	NA	NA	594410	NA	NA	566972
	437-207-29-855.94	14.266	437	NA	NA	NA	NA	NA	NA	NA	NA	NA	NA	NA	NA	NA	NA	NA	NA	NA	NA	NA	NA	NA	NA	NA	NA	NA	NA	NA	NA	NA	NA	77822.1	35734.5	36260.8	NA	61604.7	NA	NA	37367.7	51747.6	38310.3
	319-205-46-856.65	14.278	320	172369	196537	97014.8	144974	97736.1	214080	129655	68666.6	187140	112848	114785	90982.9	122664	107708	91130.1	124344	188210	119134	81608.6	138519	105113	126947	141483	170770	147028	206248	102132	175695	130753	166111	181435	182219	175434	111157	135425	144242	125069	112319	143795	169152
	291-229-75-857.43	14.29	291	NA	NA	NA	NA	NA	NA	NA	NA	NA	NA	NA	NA	NA	NA	NA	NA	NA	NA	NA	NA	39218.6	NA	37257.2	NA	NA	NA	38338.6	NA	34700.6	NA	NA	NA	NA	NA	NA	NA	NA	NA	NA	NA
Glucopyranose	204-191-46-861.30	14.355	204	4.13321e+06	1.87473e+07	4.14243e+06	3.96766e+06	2.03817e+06	5.60141e+06	3.66081e+06	1.48905e+06	5.18827e+06	2.15822e+07	1.64879e+06	1.57772e+06	7.24772e+06	2.91903e+06	2.13063e+06	2051022	2.92059e+06	2.1276e+06	2.23128e+06	2.7843e+06	685630	2.004e+06	2934861	1.61258e+06	2.78306e+06	3.33922e+06	1.97822e+06	2.35726e+06	2.28277e+06	2.34391e+06	3.44427e+06	3.88167e+06	5.36121e+06	2.11353e+06	2.97999e+06	1.69432e+06	2.24407e+06	2530657	3.45224e+06	2.73738e+06
	361-190-21-863.07	14.385	361	NA	NA	NA	NA	NA	NA	NA	NA	NA	NA	33729.4	20811	NA	NA	NA	39597.6	56868.4	25979.7	NA	54363.9	28776.2	36833.9	27877.7	38870.5	53041.8	78846.5	37324.4	54904.9	44970.7	59387.8	NA	79830.9	93995.4	22524	60936.7	36199	46065.1	NA	NA	54738.3
	221-207-52-864.89	14.415	221	22323.4	NA	39719.6	35549.7	31321	22981.7	52183.9	24383.7	46572.6	NA	34311.4	32946.7	28923.7	31636.5	36283.1	32064	54650.2	37291.7	29791	58103.9	39492	41542.1	34697.2	40360.7	35977.7	50561.7	37403.7	49213.4	34185	54220.9	NA	63140	55273.4	38188.8	37344	28841.8	32585.8	38935.4	35707.4	41320.8
	233-209-44-865.90	14.432	233	25983	NA	23818	30021	16804.6	23636.2	39852	30876.6	25688	NA	21825.1	22702.6	59007.2	24001.5	13857.6	21330.4	33677.1	24691.5	26740.8	27640.2	13267.1	19734.2	18183.1	16324.2	19701	21011	22979.3	21282.2	20433.4	18335.7	27657.9	17462.1	14415.6	14914.5	20099.4	10815.4	21886.7	12557.5	NA	15265.5
	465-381-68-867.34	14.456	381	NA	NA	NA	NA	NA	NA	NA	NA	NA	NA	NA	NA	14267.2	NA	NA	6012.24	7464.29	4767.24	NA	7874.71	NA	NA	NA	NA	NA	NA	NA	NA	NA	NA	NA	NA	NA	NA	NA	NA	NA	NA	NA	NA
	156-128-53-868.17	14.47	376	8883.19	13548.1	8359.38	NA	NA	NA	6569	5160.33	7243.71	12629.2	5274.57	10144.6	7815	7575.24	5280.05	6770.48	6834.57	7738.43	NA	8386.52	4934.33	NA	9540.29	7728.38	9116.48	NA	8520.57	6535.48	NA	NA	7614.33	8809.95	6241.95	5418.9	8502.76	NA	9066.52	8681.29	6264.95	6568.76
Galactonic acid	292-217-85-870.90	14.515	217	815774	1.00981e+06	493488	594790	379405	752157	894081	557610	574534	790418	596509	608628	1.15003e+06	672371	673929	569633	712935	634857	550790	679364	522112	732617	811266	NA	905498	760067	757166	618508	652947	636898	NA	NA	NA	619042	NA	796353	929152	718178	NA	889534
D-gluconic acid	333-103-27-873.24	14.554	333	NA	NA	NA	NA	NA	NA	NA	NA	NA	NA	678300	457723	1.10472e+06	682891	575805	583772	611422	457086	461770	475732	269742	345236	403008	2.88137e+06	551360	739865	871349	592892	535937	465795	2.44592e+06	5.5443e+06	5.5501e+06	858931	5554056	377225	774977	749323	1.23418e+06	659519
	423-174-98-873.34	14.556	423	NA	40775.7	31087.7	NA	NA	36912	NA	NA	40774.4	29043.3	NA	NA	NA	NA	NA	NA	NA	NA	NA	NA	NA	NA	NA	NA	NA	NA	NA	NA	NA	NA	NA	NA	NA	NA	NA	NA	NA	NA	NA	NA
	271-246-3-873.96	14.566	271	51694.9	72614.8	22691.1	27290	18475.3	44664.5	34646.1	35702	27868.5	NA	29073.6	29396.9	64058.6	34638.1	19639.3	28377.4	33644.9	31546.3	26217.2	36777.4	15351.9	25249	27170.4	36327.9	26878	28531.7	31441.8	31485.8	27535.9	26214.8	NA	NA	NA	25904.9	NA	17273.4	30252.9	20829.9	30141.7	22735.5
	383-332-34-875.06	14.584	383	NA	56980.6	26720.7	29601.4	24538.2	10758.8	22536.2	14236.3	32755.3	52752.7	23448	28971.4	21191	30659.2	25979.9	22495.2	13422.4	27063	NA	22215.4	16131.1	27133	23853	21955	27038.1	19862	25251.3	25945.6	22109.3	21576.4	12731.2	NA	23627.6	23796.7	26625.4	19755.2	20096.2	20916	27063.8	28050.9
	447-297-13-876.61	14.61	447	108471	118211	64245.4	57794	32897.1	83190.4	53764.5	52832.6	81807.6	181863	20839.9	21330.3	85561	26835.7	15506.6	20492.7	33950.6	19037.1	29053.1	35638.2	9667.57	13219.7	16645.6	13217.5	24202.9	23010.5	20531.9	15611.3	15726.2	NA	23717.2	NA	NA	NA	NA	NA	15974.8	13255.9	10239.3	10257.8
	227-128-31-877.61	14.627	227	58947.5	198114	69072.5	64446	24064.3	67115.3	24785.8	164906	63969.3	158881	43209.5	39473	97710.5	59893.8	28496.7	34233.6	32249.1	45100.1	34310.4	46513.8	16932.9	43527	30497	27310.3	37896.9	38121.6	29205.6	39314.3	30256.6	39635.5	32029.2	28968.8	26220	30703.3	31684	24566.8	35474.9	30520.4	28357.3	29295.1
	293-217-61-879.56	14.659	293	284293	353973	253894	319860	365784	338312	395330	261932	277389	210002	311869	371369	340895	1.0928e+06	853616	1.00521e+06	NA	242058	229403	351722	466302	928167	505104	653268	567115	469140	614743	677070	744004	823024	785838	546975	834276	262602	315343	256285	345536	307470	311366	283840
	437-174-13-880.32	14.672	437	NA	199899	68343.8	90580.1	NA	130149	127435	138556	93014.8	314479	NA	NA	NA	NA	NA	NA	NA	NA	NA	NA	NA	NA	NA	NA	NA	NA	NA	NA	NA	NA	NA	NA	NA	NA	NA	NA	NA	NA	NA	NA
	71-70-20-882.06	14.701	71	41638.1	NA	41208.1	44987	38109.9	41061.2	43798.2	38412.8	50885	NA	NA	42371	44437.7	47627.3	45747.6	42155.4	46546.7	47609.5	38076	52102.3	42509.2	44963	40977.4	43352.9	50178.2	47865.5	42582	46486.4	42339.6	49344.9	41471.8	45451.8	45470.4	45244.5	40789.2	39907.6	41294.3	39726	43798.1	50735.3
	361-162-11-882.90	14.715	361	114436	598751	114800	144872	NA	95127.4	211026	65119	141262	551688	203982	171128	322806	249535	111739	NA	190439	153591	139080	NA	89371.7	117248	132446	132856	142686	150910	144594	176519	NA	128114	199465	126335	114097	123537	156959	80871.1	NA	99911.1	138867	121251
	204-75-32-885.09	14.752	204	585775	1.50968e+06	573856	607030	363718	518213	504447	332729	603085	896685	423003	358521	720818	547458	360801	369829	364581	446342	355853	345569	179219	457098	497386	234196	457007	355305	437270	294917	489593	249575	701828	498100	438916	348072	553000	370441	465731	471119	558727	360026
	355-113-11-885.82	14.764	355	NA	NA	NA	NA	NA	NA	NA	NA	NA	NA	68506.3	90034.5	147573	101908	49651	87208.9	51121.3	68360.6	57220.8	111836	31324.4	85248.9	92792	63336.1	106250	84211.2	119364	111857	92326	60400.5	134117	75830.3	60720.8	65185.6	129407	NA	134381	93156.8	90933.4	NA
	393-103-64-886.68	14.778	393	407787	1.3076e+06	266423	303914	193763	304762	557745	306479	334113	502896	336887	127448	263507	137214	121312	116356	223929	124596	121510	201239	107363	161996	167547	152788	214454	222417	196893	171262	193311	161587	617692	209898	162298	140623	182676	179630	189148	339589	331945	191196
	351-102-16-888.85	14.814	351	36543.5	33888.7	12151.8	NA	NA	34552.8	18559.1	23713.3	14314	43369.3	NA	NA	NA	NA	NA	NA	NA	NA	NA	NA	NA	NA	NA	NA	NA	NA	NA	NA	NA	NA	NA	NA	NA	NA	NA	NA	NA	NA	NA	NA
	79-67-92-889.90	14.832	67	NA	21321.9	NA	13678.2	NA	NA	14642.4	6317.33	13543.1	14510.1	NA	11568.2	NA	24746.1	NA	11610.7	12403.1	16975.2	NA	NA	8162.86	17426.9	NA	11833.6	10066.5	13084.9	15422.2	8313	NA	NA	NA	14334.4	17931.3	13764.5	NA	NA	NA	13040.9	16363.7	17624.6
	321-233-13-891.19	14.853	321	NA	185069	72816.9	72901.9	48887.2	186786	119444	166081	84453.4	199942	68411.4	71083.2	267750	97273.6	41971.5	66094.8	71733.5	87289.2	83604.5	79385	52737.6	78199.9	65451	51690	62989.2	51099	60594.7	75019.6	NA	66585.9	72746.1	49303.6	41889.2	56176.1	77133	47258.5	66133.9	38038.6	64187.9	48941.6
	373-331-72-892.26	14.871	331	NA	NA	NA	NA	NA	NA	NA	NA	NA	NA	NA	NA	14301.5	NA	NA	7327.33	10292.9	7440.62	NA	8485.43	NA	NA	NA	NA	NA	NA	NA	NA	NA	NA	NA	NA	NA	NA	NA	NA	NA	NA	NA	NA
	333-292-77-893.38	14.89	292	30211.2	25963	22051.3	28096	26780.6	36880.8	36257.6	29995.5	22534.6	NA	44529.1	39540.9	34560.2	38381.1	21925	29159.1	55044.8	43001.8	24611.5	38489	22098.3	32872.3	36349.8	51966.5	36717.1	41021.8	28133.7	51312.5	33807.2	45543	62812.4	42920.4	35292.7	35434.6	35743.3	26988.9	31362.5	36457.4	41022.2	44135.6
	370-239-99-894.11	14.902	222	NA	NA	11627.9	11499.8	NA	NA	14715.7	NA	17325.4	NA	19423.3	10329.6	NA	NA	10110.9	11575.9	NA	11374.6	NA	NA	7250.24	13562.2	13240.6	NA	NA	NA	NA	21772.9	13904.2	16891.5	NA	13168.1	NA	NA	NA	NA	NA	NA	13278.5	NA
	311-67-94-896.41	14.94	67	NA	NA	NA	NA	NA	NA	NA	NA	NA	NA	16469	10909.7	NA	NA	18715.6	9362.76	8758.1	11910.9	5432.43	NA	NA	NA	NA	NA	NA	NA	NA	NA	NA	NA	NA	NA	NA	NA	NA	NA	NA	NA	NA	NA
	321-318-2-897.20	14.953	321	1.41021e+06	1.22978e+06	346419	420628	230315	872056	702705	948502	427367	1.61108e+06	356275	391116	1.2472e+06	488002	215438	343669	481509	400024	409080	471252	202820	349652	320979	259364	330531	313797	360945	380784	353886	331930	500081	234435	244290	288699	389689	172867	365266	198485	309670	237764
	217-103-55-899.11	14.985	103	1.48604e+06	3.88911e+06	1.30989e+06	1.47748e+06	859219	2.49872e+06	2.01129e+06	1.08451e+06	1.66238e+06	4.2755e+06	1424154	1.43909e+06	2.93228e+06	1.85449e+06	914053	1.3707e+06	1.79031e+06	1.49604e+06	1.25272e+06	2.02089e+06	866261	1361485	1.31527e+06	1.20102e+06	1.57389e+06	1.57196e+06	1.46344e+06	1.77061e+06	1.34705e+06	1.40214e+06	2.11208e+06	1.19704e+06	1.10683e+06	1.26168e+06	1.48917e+06	843161	1.40459e+06	948972	1.38112e+06	1.25622e+06
Palmitic acid	117-75-84-900.62	15.01	129	1.38941e+06	2.6325e+06	1.20962e+06	1.35026e+06	990937	1.3915e+06	1.68759e+06	1.17256e+06	1.7171e+06	2.67239e+06	1.25154e+06	1.30556e+06	1.81352e+06	1.91535e+06	1.07972e+06	1299563	1.57716e+06	1.46106e+06	1.00191e+06	1.68717e+06	1.11048e+06	1.38792e+06	1.25534e+06	1.34224e+06	1.7596e+06	1.65702e+06	1.30711e+06	1.70572e+06	1.27309e+06	1.56667e+06	1.37337e+06	1.39413e+06	1.3138e+06	1.30236e+06	1.58004e+06	1.01905e+06	1.3429e+06	984505	1.33929e+06	1.63432e+06
	246-142-28-903.34	15.056	246	NA	NA	NA	NA	NA	NA	NA	NA	NA	NA	NA	NA	NA	NA	NA	NA	NA	NA	NA	NA	NA	NA	NA	NA	NA	NA	NA	NA	NA	NA	30954.8	44806.6	NA	20793	46565	14052.1	30027.8	NA	NA	16607.8
	204-191-6-904.07	15.068	204	1.1417e+06	1.89838e+06	721412	821332	405430	1.02836e+06	825265	NA	865663	2.39521e+06	479532	517627	1.60636e+06	683805	480909	506122	526591	618791	609812	586921	NA	428283	574428	336960	511595	503554	439735	373528	485019	376937	608277	388951	582205	432412	486644	325369	415350	464030	567184	317912
	437-174-20-905.26	15.088	437	979661	812023	NA	271676	NA	813547	NA	569358	NA	1.14006e+06	262918	NA	NA	313321	NA	252992	NA	NA	271732	361104	172311	225555	239868	209006	NA	275144	263767	330593	NA	267115	NA	NA	NA	NA	NA	NA	NA	NA	NA	NA
	289-174-45-905.80	15.097	289	NA	NA	NA	NA	NA	NA	NA	NA	NA	NA	NA	NA	NA	NA	NA	NA	NA	NA	NA	NA	11525.3	19876.7	23493.5	NA	34188.1	18045.7	34208.6	21617.7	NA	NA	NA	19444.1	35846.3	19411.7	33943.9	14115.9	28583.6	21665	NA	NA
	338-279-39-906.82	15.114	368	NA	17086.9	11600.2	12373.4	NA	NA	NA	5425.43	9987.62	11043.1	NA	NA	8906.52	12535.7	NA	NA	8153.38	NA	6703.33	9070.14	NA	NA	8839.9	6865.24	10813.3	7861.57	NA	8486.76	NA	NA	NA	NA	NA	NA	NA	NA	NA	NA	NA	NA
	217-103-44-908.21	15.137	217	10946402	1.08782e+07	3.28812e+06	3.80703e+06	2.09911e+06	9.52928e+06	5.56301e+06	6.97954e+06	4.54479e+06	1.34824e+07	3.59509e+06	3.53555e+06	9.2003e+06	4.21413e+06	2.15661e+06	3.21192e+06	4633311	3.75046e+06	3.29884e+06	5.12859e+06	2.61713e+06	3.40361e+06	3316983	2.76595e+06	3.6188e+06	3.99646e+06	3.38383e+06	4.42131e+06	3.12735e+06	3.94744e+06	4.71385e+06	2.67229e+06	2.91323e+06	2.83109e+06	3.37867e+06	2.08444e+06	3.50932e+06	1.84907e+06	2.95692e+06	3090067
	361-271-5-908.74	15.146	361	NA	NA	NA	NA	NA	NA	NA	NA	NA	NA	739699	751398	NA	897284	425915	706677	NA	783908	700110	NA	NA	674873	684128	NA	724802	NA	737181	875193	677141	NA	NA	NA	NA	598961	727074	NA	693556	396914	605516	NA
	204-131-22-909.52	15.159	131	NA	NA	NA	NA	NA	NA	NA	NA	NA	NA	NA	NA	NA	NA	NA	NA	NA	NA	NA	NA	254975	NA	NA	340359	350934	391973	NA	NA	NA	362520	NA	NA	NA	NA	NA	NA	NA	NA	NA	NA
	373-102-72-910.20	15.17	373	7452	21920.1	NA	NA	NA	9111.52	9509.52	NA	8989.48	23773.1	NA	NA	NA	NA	NA	NA	NA	NA	NA	NA	NA	NA	NA	NA	NA	NA	NA	NA	NA	NA	NA	NA	NA	NA	NA	NA	NA	NA	NA	NA
	202-87-81-911.13	15.185	202	109085	139436	62515.3	78994	52391.4	101791	92124.6	42538.7	108099	121533	61370.7	56795.6	140086	57687.7	47085.7	60799.2	66315.1	64538.5	58517.3	83554.8	34864.3	47130.9	55534.8	84635.2	65148.8	72352.1	57599.2	69848	57951	67189.4	70999.8	58064.9	71626	63985.4	65384.6	38539	47632.7	57111.4	69085.9	63486.7
	321-103-23-913.37	15.223	321	6.82501e+06	6.19077e+06	1.30802e+06	1.4783e+06	713808	5.83098e+06	2.66659e+06	3.70092e+06	1.86474e+06	7.22131e+06	1.30391e+06	1.19288e+06	6.00478e+06	1.46885e+06	641998	1.06242e+06	1.78858e+06	1.26786e+06	1.15126e+06	1.74568e+06	558556	1.09281e+06	963174	797699	1.16368e+06	1.24963e+06	1.10509e+06	1.49522e+06	961941	1.24233e+06	1.66391e+06	692803	792488	888074	1.08321e+06	492337	1.07493e+06	598292	975842	812022
	259-174-40-914.36	15.239	259	128128	59239.3	33739.3	39120.1	NA	104252	50175.8	103100	56621	83674.2	19405.2	17981.4	71188.7	23421.6	21878.2	22270	25679.9	25097.1	28069.2	35943.3	NA	16334.2	15047	19815.8	23713.7	16682	12376.3	NA	NA	NA	20570.5	18557.2	30085.5	15779.5	16483.9	NA	15264.5	NA	NA	NA
Inositol	217-191-51-916.79	15.28	305	9.92124e+06	1.2312e+07	1.0879e+07	1.13565e+07	8.08255e+06	9.66027e+06	1.13627e+07	8.45131e+06	1.0806e+07	1.07747e+07	9.81074e+06	9.49259e+06	1.08366e+07	1.08541e+07	8.41245e+06	9.55002e+06	10918624	9.62968e+06	8.11426e+06	1.13802e+07	8.52103e+06	8.35866e+06	9.80798e+06	1.03411e+07	1.08421e+07	1.08574e+07	1.02907e+07	1.02658e+07	9.33802e+06	1.03313e+07	1.09713e+07	1.05715e+07	9.95073e+06	9.73105e+06	1.03219e+07	9.96086e+06	9.61229e+06	1.03899e+07	1.11894e+07	1.08826e+07
	361-188-15-917.57	15.293	361	NA	20145.8	NA	NA	NA	19757.9	17584.6	15826.8	NA	24541.7	15215	13838.3	21770	NA	11128.5	NA	NA	15060.2	NA	NA	NA	NA	NA	NA	NA	NA	NA	NA	NA	NA	NA	NA	NA	NA	NA	NA	NA	NA	NA	NA
	319-205-59-922.32	15.372	320	573790	1.1007e+06	570442	790470	444115	565742	865929	336677	668408	580329	681443	745262	1.23874e+06	755223	718570	743156	720057	800658	648439	850845	496900	700681	698684	687016	822314	819695	782193	641060	662956	652583	696210	768978	738945	612692	751846	625128	656211	690519	788538	667953
	338-249-43-924.36	15.406	338	NA	36346.5	22374.4	24749.3	19146.1	NA	33872.9	NA	34188.4	21352.9	26702.1	20842.2	15181.9	26457.6	25626.9	20973	24378	24266.4	14002.8	29654.6	23767.6	25075.4	22854.7	28217.1	29181.6	30098	20314.6	29807.7	15930.7	28895.5	10642.5	32840.7	31589.6	24651.9	21622.3	20150.4	15453.9	22381.3	28217.7	31966.4
	341-72-75-925.47	15.425	357	NA	NA	NA	NA	NA	NA	NA	NA	NA	NA	NA	NA	NA	NA	NA	NA	NA	NA	NA	NA	NA	7328.48	NA	NA	7592.38	NA	NA	5474.86	7006.33	7017.71	10311.8	NA	NA	8475.9	9638.67	NA	7160.81	NA	NA	7062.1
	290-74-42-927.23	15.454	290	137342	64867.6	153264	166336	106638	141666	347566	223368	201369	68422	183017	184032	273822	186308	158070	165385	233468	187314	174143	251391	169213	189608	180367	224628	257660	250182	204841	293345	194405	231207	326512	307032	352707	279537	306009	230539	237023	279890	301125	330154
	217-207-26-928.36	15.473	221	NA	31610.3	29882.5	27999.5	21634.6	NA	46510.4	NA	36379.9	20297	28859.5	31598.1	NA	24499.1	31134	26571.5	44006.4	32531	21198.7	46666	36628.5	31549.7	28573.9	36635.6	30668.1	46204.1	30772.5	41968.4	26392.8	43126.6	NA	48580.2	48811.4	NA	NA	29721.8	27883.7	NA	38596.3	39596.4
	319-205-81-929.32	15.489	103	46612.7	90867.6	39889.4	52700.3	28956.7	46955.4	67107.4	NA	50762.1	63186	47910.3	NA	87533.3	51719	NA	48639.2	64067.9	51108.3	37469.9	67476.6	33099.5	43117	47191.2	80032.9	56544.8	59728.5	54900.1	51036.2	51680.3	45732.4	60751.8	67065.5	69390.7	47773.8	65190.9	37834.1	39028.9	43648.4	56615.7	48437
	319-205-70-932.48	15.541	319	127211	NA	131165	174402	87304.9	NA	205263	NA	139581	181856	143232	129638	239892	163094	152068	135077	152340	141670	114693	180226	91876.3	137074	135555	161342	191320	175294	160871	174950	158392	146314	NA	237545	251562	148967	NA	130824	158147	145009	210513	174560
	318-236-57-933.83	15.564	236	23193.7	12140.1	11897.6	13466.7	NA	32099.9	14372.6	21700.4	13820.2	24815.3	6506.48	6667.81	35135.6	7929.05	6051.05	7909.43	16101.8	8613.81	9519.76	17334.1	7327	NA	5332.67	10321.1	11411.6	11443.1	NA	10198.9	NA	NA	NA	NA	NA	NA	NA	NA	NA	NA	NA	NA
	319-205-69-935.40	15.59	205	208618	434408	202452	271715	144640	187758	199096	128694	225880	266609	231405	146966	256112	262509	176381	229182	260288	163774	110772	298923	95326.6	150127	150444	231795	282149	273102	172305	266768	240516	218197	249998	316059	348223	154727	305520	210073	241758	156443	305891	233624
	71-69-39-936.90	15.615	71	25555.6	97763.3	26634.7	34726.2	24005.1	28962.6	29922.4	25257.7	26303.3	116761	37946.2	36354	NA	38664	36881.6	26956.7	26074.8	29288.7	23520.4	28005.4	22392.4	28347.9	27264	24232.4	27627.2	26234.3	23692.6	27788	25116.3	26495.9	24885.4	27394.4	25724.4	27434.3	24412.4	23433.9	27961.3	26059.8	30474.3	27145.9
	352-239-24-937.69	15.628	352	60356.7	10378.2	NA	10383	NA	21714.3	22119.4	5715.9	5748.57	58465.4	3666.33	10415	30970.4	NA	NA	5658.67	10355.5	6890.62	18067.8	12373.3	NA	NA	NA	NA	NA	NA	NA	NA	NA	NA	NA	NA	NA	NA	NA	NA	NA	NA	NA	NA
	143-75-54-938.91	15.649	75	42908.7	63657.1	NA	NA	29902.4	36047.6	NA	31027.2	NA	43392.9	NA	NA	NA	NA	NA	NA	NA	NA	NA	NA	NA	NA	NA	NA	NA	NA	NA	NA	NA	NA	NA	NA	NA	NA	NA	NA	NA	NA	NA	NA
	204-103-53-939.71	15.662	103	66304.4	122309	67800.9	86183.6	44605.7	64052	136717	52024.7	112321	84855.2	90191.7	77651.5	152111	89649.7	77309	75490.6	136564	86558	65564.3	141286	83330.8	74815.6	76117.6	176628	130138	132966	83106.1	125540	78472.9	107775	122755	174289	169647	95265.6	113974	67589.3	76165.7	87340.5	106249	135316
	72-71-1-940.99	15.683	72	84480.1	87863.9	NA	36474.6	NA	NA	24822	NA	NA	57239.4	32991.7	29902	55430	15134.3	NA	NA	25701.3	25553.2	NA	51593.2	37442.8	NA	NA	35842.1	34049.8	30309.1	23061.9	34898	NA	26335.2	75923.8	42102.3	NA	NA	41844.4	NA	NA	45611.2	24318.7	52241.2
	373-117-41-942.43	15.707	373	19223	32287.6	13817.7	NA	NA	15644.9	17848.5	10368.1	15497.1	24365.4	NA	NA	NA	NA	NA	NA	NA	NA	NA	NA	NA	NA	NA	NA	NA	NA	NA	NA	NA	NA	NA	NA	NA	NA	NA	NA	NA	NA	NA	NA
	174-86-7-943.04	15.717	174	33182.3	63573.6	28326.6	32348.6	22366.1	23354.7	43674.7	22613.6	33161	52165.8	23407.5	25200.1	25733.3	26910	18019.8	20547	27318.4	23426.4	11504.5	26941.5	14042.3	29085.8	23322.7	26507.1	33687.7	18051.2	30299.3	31212.3	27160.6	NA	47984.4	31886.3	22197.6	22381.7	39356.9	25915.6	38342	42697.1	26440	33790.3
	327-132-79-944.50	15.742	327	NA	28060	20175.7	20091.5	20219.8	NA	24898.2	11252.7	28244.1	24684.8	18709	17959.1	16516.2	33147	18687.6	17391.9	19997	20857.8	14343.8	21922.7	19196.7	21826.8	18305.5	24419	32063	22063.7	20281.8	21453.4	19508.1	20544.1	12837.5	22215.7	21214	18397.2	22019.5	15798.1	21269	15947.2	20685.7	30865.9
	204-131-12-946.61	15.777	131	49653.8	103707	53147.8	74316.5	44824.3	52196.8	94367.6	36394.9	69180.2	89646.4	69751.8	68166.2	119114	85675.5	92298.8	72851.1	76250.4	78549.4	66783.1	88541.4	55448.5	78729.6	71080.1	54729.9	93258.4	82235	74286.4	50287.6	63694.8	61253	61331.9	62849	77532.1	58422.9	71468.1	57794.1	67930.1	57754.2	81311.6	53310.6
	327-72-25-948.76	15.813	327	NA	26545.9	14400.7	18036.4	21477.2	12842.5	NA	16729	NA	NA	17483.3	17909.5	19701.4	16059.5	20565.4	15623.4	NA	17064.5	15827.9	NA	14110.1	20157.4	16028.9	16523.1	17803.5	17208	17749.3	NA	16588.7	NA	15242.5	18208.6	NA	15006.8	15320.9	13895.1	16148.5	15246.3	16839.7	NA
alpha-I-Mannopyranoside	204-131-9-951.50	15.858	204	4.34948e+06	9.06123e+06	4.97953e+06	7.6309e+06	3.63945e+06	4.83396e+06	9.51876e+06	3.09788e+06	5.93622e+06	8.67275e+06	6.02524e+06	6.90625e+06	1.32291e+07	6.9374e+06	9.98546e+06	6.64653e+06	7.41227e+06	7.83664e+06	6.39266e+06	8.00827e+06	4.41245e+06	5.84513e+06	5.74103e+06	5.27566e+06	7.20456e+06	7.48041e+06	6.06069e+06	4.47413e+06	5.68217e+06	5.60232e+06	5.30613e+06	5.95591e+06	8.08302e+06	4.87419e+06	6.5984e+06	5.07119e+06	5.6478e+06	4612783	7.05055e+06	4.71262e+06
	235-174-25-953.75	15.896	235	22159.2	41765.4	25006.2	39953.3	17916.6	21867.4	49084.6	NA	28923	43488.3	31321.5	31760	59075.5	36975.8	43498.3	29116.6	36585.3	28874.9	30136.8	39368.6	18855.4	28306.9	27764.5	24832.9	34563.6	33663.7	26121.2	23654.3	27336.7	26987.8	28148.2	31550.7	36313.2	22042	29964.7	24785.3	29385.2	NA	35637.7	25101.6
	143-75-31-955.88	15.931	143	358397	894354	109740	350825	323640	292115	260657	339810	339725	594840	401298	447409	2.43462e+06	503556	281580	209609	301440	208146	151085	196864	102202	79642.1	120435	205452	141572	157497	139521	157911	156478	121288	141316	234779	340365	212670	211409	97298.6	171686	140557	195014	131281
	204-103-48-957.24	15.954	357	94997.3	163723	172517	152541	72115.4	132870	149249	99565.7	126096	294797	223996	124382	415619	238851	110106	123855	233395	180313	146415	163028	78703.9	153925	153630	147807	134940	167376	108958	103620	117898	162017	246094	188059	167527	218779	277047	126390	241678	221387	189571	178834
	277-233-65-957.97	15.966	277	NA	28500.3	12507.7	16412.5	10766.4	15856.2	19095	12720.1	14718.5	22457.4	14248.2	14649.1	30537.7	16478.4	16252.4	14011.7	15943.2	15842.2	14490.4	17642.1	11517.2	15167.4	15039.6	15262.7	16655.5	15653.6	17908.1	13661.7	13504.5	NA	15393.8	16085.9	16712.3	14684.7	16836	14506.1	16997.9	15708.7	16756.6	14441.4
	368-338-29-960.71	16.012	368	NA	44890.5	28298.4	27405.7	NA	NA	31736.1	NA	31118	33417.9	NA	30765.6	NA	27537.7	27659.6	NA	21353.5	28860.5	NA	23804.9	20959.8	NA	NA	25891.4	26763.6	28416.6	NA	27234.5	NA	24382.1	NA	27289	25154.9	26779.9	29635.8	NA	28076.5	28362.6	29792.4	32660.4
	246-71-63-961.76	16.029	246	NA	16620.4	10379.5	11712.1	NA	NA	17742.9	NA	11835	17796.6	NA	NA	19040.1	9831.29	NA	NA	15129.4	9488.43	NA	14202.6	10738	8863.29	8629.1	NA	12453.1	13904.9	NA	10906.2	NA	11623.7	11958.2	8244.24	9744.9	8557.24	NA	NA	8446.14	5910.1	8644.81	11322.5
	355-221-89-962.82	16.047	355	NA	16459.6	8075.05	10386.6	20985.5	4036	7890.62	5785.38	5844.67	13759	7513.67	26324.3	9443.14	NA	14346.1	6110.43	9948.05	10815.7	11723.4	10886.1	14901.5	14438.3	6995.43	6270.52	5156.57	10657	21475.6	8798.33	18121.9	9673.1	7031.29	8779	8413.81	14037.3	20383.4	6273.43	15027	6585.9	14157	5024.24
	117-115-39-963.87	16.064	117	25441.8	39010.8	17993.7	22784.8	29657.5	23287.4	29692.5	23829.2	23843.6	35709.2	30001.8	30927.5	33087	24875	37285.9	33253.2	29340.8	56054.8	38676.7	21085	34611.6	30745.3	32207	32181.5	37813.8	21477.7	26582.7	31987.4	37335	31166.5	52215.8	17758.5	21937.3	37516.6	46940.5	29902.5	40904.2	22816.2	30356.2	24905.4
	204-131-23-965.37	16.09	131	39539.3	80159.3	40902.2	42594.8	25060.4	37981.5	47690	30238.3	44134.8	51206.1	33389.2	28141.8	53742	30798	26109.5	27121.4	40042	31397	33076.7	41349.1	17688	33292	30174.6	28438.1	34330.2	32015.6	32517.2	34417	29180.9	29410.1	38700	35418.4	39187.7	33394.3	40024.8	31785.9	41835.3	35634.3	35905.8	34894.8
	342-299-86-968.78	16.146	299	34076.8	68641.3	27629.3	25800	23769	29475.4	17015.1	24483.1	34990.6	79032.3	17151.2	22820	58565	47445.5	27115.9	25956.7	11473.5	28802.8	28374.7	35342.2	17393.8	24133.3	23441.4	24692.3	32403.5	32620.8	21961.1	24756.3	24145.3	29544.6	NA	34611.8	36916	28889.4	39590	20073.2	35909.1	26981	18746.2	33910.2
	71-69-21-971.05	16.184	71	4.40793e+06	5.40245e+06	5.34461e+06	5.59578e+06	4.97099e+06	4.74834e+06	5.00076e+06	4.5814e+06	6.0279e+06	4.64322e+06	5109673	5.12943e+06	4.67733e+06	5.88998e+06	5.90071e+06	4.99571e+06	5.59254e+06	5.69626e+06	4.6077e+06	6.13739e+06	5.59519e+06	5.74702e+06	5.11286e+06	5.80481e+06	6.0508e+06	6.10856e+06	5.13716e+06	6.27231e+06	5.0588e+06	6.35991e+06	4.5515e+06	6.04547e+06	6.20345e+06	5.70512e+06	5.0168e+06	5.03071e+06	4924986	4.88744e+06	5.50214e+06	6.22662e+06
	218-130-62-971.90	16.198	130	29601.8	30232.1	18962.2	21033.3	14969	24428.7	30451.6	28999.4	22553.6	46357.1	21989.7	26547.7	37206.1	24946.7	14639.1	24794.2	NA	27164.3	29896.8	NA	12127.1	13355.3	14739.2	54116.8	24397.1	22590.6	30240.1	14995	25943.5	12714.4	40332.8	24488.2	44498.1	35644.9	32464.7	15627.9	24288.4	18906.7	23253.3	26789
	75-67-66-977.01	16.283	67	NA	301974	212068	230670	237294	NA	NA	NA	186340	232867	195029	219103	215781	551227	233530	208594	226489	273229	125389	268158	164170	323514	226658	NA	384380	190872	260196	161998	301785	180877	107042	NA	NA	257526	300608	NA	324142	202588	308003	257914
	204-103-7-977.86	16.298	204	4.46588e+06	7.44817e+06	3.93328e+06	5.20183e+06	2.57569e+06	4.336e+06	7.27213e+06	2.11811e+06	4.81049e+06	6.64822e+06	3391721	4.11133e+06	8.44568e+06	4.66587e+06	2.04596e+06	3.61545e+06	6.05175e+06	4.80336e+06	2858556	5.84657e+06	2.02113e+06	3.10514e+06	3.30999e+06	3.26806e+06	3.36918e+06	4.6043e+06	4.35201e+06	4.27285e+06	2.7844e+06	3.11793e+06	3.55651e+06	3.44459e+06	5.26659e+06	3.52327e+06	4.3338e+06	2.27438e+06	3.65204e+06	2.16354e+06	3.40202e+06	2.78701e+06
	339-84-30-979.07	16.318	339	NA	148018	104495	NA	130127	NA	121309	36897.1	185177	124845	105950	121820	84571	285647	127011	124228	115867	134368	71475.4	138088	134798	146361	122096	179088	270648	162887	138615	158134	170173	144059	53461.4	161921	151160	136751	171190	105536	166104	106771	148260	240180
	72-60-0-979.86	16.331	357	NA	NA	NA	NA	NA	NA	NA	NA	NA	NA	NA	NA	NA	NA	NA	NA	NA	NA	NA	NA	12489.1	NA	10612	NA	NA	22538.4	NA	17052.4	NA	21951.8	NA	NA	NA	NA	NA	NA	NA	NA	NA	NA
	337-104-36-980.38	16.34	337	NA	29666.8	19047.6	22720.4	24517	8324.57	NA	9806.14	NA	29815.6	19154	21723.1	NA	78543.5	23347.6	19011.4	NA	27244.2	NA	NA	NA	28772.1	20886.7	NA	NA	NA	29017.2	NA	35904.3	16507.1	8874.76	NA	NA	24761.8	36673.2	19808.3	48117.2	20038.3	28235.7	NA
	91-79-81-981.19	16.353	91	NA	NA	NA	NA	NA	NA	NA	NA	NA	NA	NA	NA	NA	NA	NA	NA	NA	NA	NA	NA	39951.8	NA	NA	54070.5	93977	56028.7	NA	43698	NA	50354.5	NA	NA	NA	NA	NA	NA	NA	NA	NA	NA
	79-70-38-981.75	16.362	93	7049.38	75487.9	47105.1	55751	55925.7	14244.2	27218.1	17056.2	NA	55845.8	45530.2	48708.9	27982	140150	54662.4	45788.6	NA	68963.7	26989.4	NA	24062.7	68474	54385.2	44985	NA	41777.8	66029.9	30691.9	71927.5	NA	NA	39694.5	37281	59931.6	70812.2	48205.5	79199.4	48676.5	74717.4	45182.1
	189-179-60-983.40	16.39	189	NA	NA	16072.7	17377.7	9855.19	NA	14571.9	NA	15401.2	30077.9	NA	NA	37105.7	19124.3	17463.8	12202.1	15331.9	16444	13198.7	13896.4	NA	10753.8	11772.8	NA	12624.7	13173.2	11484.4	NA	11236.1	8965.38	10377.8	NA	NA	9425.57	NA	NA	NA	8624.33	11466.3	10103.9
	204-103-35-984.85	16.414	204	161782	459523	150692	169018	NA	161979	221142	NA	189857	609297	123523	112612	337925	NA	NA	NA	155716	NA	NA	192762	NA	NA	NA	NA	NA	NA	NA	NA	NA	NA	NA	340514	536117	NA	209198	71561.3	84139.4	NA	NA	112923
	103-89-5-985.21	16.42	103	NA	NA	NA	NA	NA	NA	NA	NA	NA	NA	32011.9	57630.1	NA	43217.2	30966.7	32001.4	NA	33907.2	34929.2	NA	39472.1	31133.9	50322	147765	83438.8	97929.8	35158.7	70049	62656.1	59164.4	93701.3	NA	NA	NA	104743	35145.4	51891.9	48199	71777	NA
Stearic acid	117-75-84-986.53	16.442	129	255512	510831	312942	357568	352932	272458	373729	228883	359695	467506	317772	300736	305239	399932	325168	287512	300816	374506	273377	320346	262871	323365	282392	319066	378310	311942	272376	314566	296286	308582	312659	328300	330568	304848	353940	270902	308673	286133	333745	368633
	221-114-93-987.14	16.452	114	NA	29642.7	19155.9	23070.7	12995.7	14396.7	NA	12481.9	NA	NA	NA	NA	NA	NA	NA	NA	NA	NA	NA	NA	NA	NA	NA	NA	NA	NA	NA	NA	NA	NA	NA	NA	NA	NA	NA	NA	NA	NA	NA	NA
Sinapic acid	368-338-82-988.73	16.479	368	45862.2	568709	411094	401699	384338	86581.2	379589	102049	400215	429005	484245	452775	358854	475042	438508	370707	306802	419935	324961	343512	279098	422321	416207	330054	438273	363454	405563	372112	382699	355218	197010	368986	360049	423215	455165	425052	373596	473213	505717	432039
	290-204-60-993.07	16.551	290	286854	493374	272446	316307	180735	267258	396585	196340	294552	261669	272172	291313	517595	324792	260529	267551	288826	307687	253316	381488	193237	251682	260066	257311	304772	308193	292167	286194	248693	256158	316687	296070	324430	260801	338530	212516	257155	251831	297504	275800
	70-67-34-995.45	16.591	70	8930.33	15834.1	21167.6	16691	14305.7	12375.4	25451	9237.19	26967.2	15587.8	22152.8	17033	11093.6	22476.7	18306.5	18268.3	34515.2	17859.3	13189.8	37171	17395.9	20989.2	23607.6	20584.5	26391	26353.8	19696.4	10505.5	18126.9	23915.7	16746.6	29498	7168.67	17348.6	22285.7	17344	15922.9	17663.2	20137	27724.2
	67-66-3-996.10	16.602	67	NA	NA	NA	NA	NA	NA	NA	NA	NA	NA	NA	NA	NA	NA	NA	NA	NA	NA	NA	NA	30206.6	34274.1	31724.9	37137.9	NA	37358.1	26608.3	NA	28743.3	35090.4	NA	NA	NA	NA	NA	NA	NA	NA	NA	NA
	426-249-84-997.25	16.621	249	NA	55257.2	45334.9	42220.1	43881	NA	38420.4	7929.19	53126	42561.9	50823.5	47868.9	22394.7	47013	48151.4	35755	26341.6	42984.3	22682.3	31287.2	25862.3	44332.7	40783.4	32775.1	46926.8	34124.6	40573.8	39283	36513.5	37979.1	9410	28451.3	33392.8	43380.2	41843.6	37652.4	30701.1	41258.9	48864.8	47224.4
	245-105-72-998.63	16.644	245	19284.8	26759.4	17493	19855.1	13242.9	18166.4	26941.6	16478.1	19918.1	18773.1	18598.6	16659.8	31471	21187	14877.1	17071.4	21814.2	18037.8	15567.9	20224.4	NA	16163.7	16656.5	NA	NA	18825.3	15846.4	18144.5	14130.4	NA	22937.6	NA	NA	17124.7	20285.8	14517.4	17522.8	23145.4	19981.2	NA
	70-69-22-999.46	16.658	284	8543.95	17213.2	11996.5	12548.4	10991.4	10091.3	16668	8839.67	14433.5	19532.1	13187.6	11320	10992	13412.6	12890.5	11625.6	13658.2	13235.9	11460	11644.3	NA	12635.5	11474.6	NA	13284	NA	9598.29	11685	11822.9	NA	12861.4	NA	10263.1	11509.9	11872.7	9946	11362.8	11172.4	11575.2	NA
	217-70-28-999.90	16.665	217	NA	NA	NA	NA	NA	NA	NA	NA	NA	NA	NA	NA	NA	NA	NA	NA	NA	NA	NA	NA	46098.9	NA	NA	142568	NA	76849.2	NA	56942.2	NA	55578.9	NA	NA	NA	NA	NA	NA	NA	NA	NA	NA
	95-67-23-1000.48	16.675	95	NA	46457.5	22826.7	26418.7	21982.5	NA	NA	NA	NA	25536.3	22071.8	NA	16430.4	65341.6	NA	23072.9	19832.1	33236.6	NA	NA	NA	34478	29032.9	30537.1	NA	28926.3	27077.1	NA	28587.5	25726.4	NA	NA	NA	33259.1	30580	21857.7	22297.6	23005.3	42901.2	NA
	128-96-36-1002.30	16.705	128	9547.24	23136.8	NA	NA	NA	NA	21880.1	NA	12363	15375	NA	NA	NA	NA	NA	NA	NA	NA	NA	NA	NA	NA	NA	NA	NA	NA	NA	NA	NA	NA	NA	14056.1	16512.8	14150.5	13161.6	NA	NA	NA	NA	13141.3
	159-103-27-1003.41	16.723	292	191471	319162	127064	164339	95705.8	144400	171637	80847.6	141786	213111	121859	112020	223336	146344	78765.9	123974	118184	120539	109816	179941	81859.1	121912	134971	137701	149929	141031	127136	140210	122308	128212	168287	105703	146641	107653	160487	82456.5	150237	111005	138189	118315
Fructose-6-phosphate	315-299-49-1004.60	16.743	315	96817.9	47145.8	115461	116044	68120	126753	224629	153174	128528	19907	125725	76496.3	177888	113615	74667.8	93780.3	152315	108247	86212.4	128983	60760.3	95281.3	102039	110952	127715	157093	130088	149397	122721	162375	255096	134599	157213	133306	166838	100562	148986	170439	186929	163831
	204-103-12-1005.99	16.767	204	687434	1.05415e+06	421264	535570	460397	NA	1.60599e+06	380090	887463	873521	945745	1.46878e+06	1.25782e+06	1.11376e+06	1.15776e+06	1.17274e+06	819938	846596	861084	1.20473e+06	1.05847e+06	741147	855160	5.59178e+06	1.7276e+06	1.82714e+06	1.79705e+06	1.61848e+06	1.51469e+06	1.53836e+06	3.53521e+06	3.21583e+06	7.02529e+06	2.21447e+06	3.98131e+06	916876	1.27398e+06	1.27049e+06	2.57641e+06	1.98959e+06
	128-70-12-1006.66	16.778	128	NA	69888.8	43110.6	56556.9	29948	NA	NA	NA	NA	46934	49147.2	NA	NA	55367.1	58165.9	52298.2	NA	53688	47542.7	NA	37072.9	44890.7	47445.5	NA	NA	67365	47457.1	NA	44789	47430.9	NA	NA	NA	NA	NA	NA	NA	NA	NA	NA
D-glucose-6-phosphate MX1	387-299-59-1010.21	16.837	387	211327	76186.5	254305	248291	143635	259846	505796	361835	262928	33330.2	290065	160216	323597	235448	156381	203698	302754	213110	178445	262650	131124	217143	240895	201282	255842	286848	245932	279625	257715	309420	530009	236649	266767	264514	320651	206138	272877	372040	388532	331868
	67-65-8-1012.93	16.882	67	NA	45346.9	31820.2	31236.1	31843.1	NA	29955	8217.19	48146.2	24596.1	27573.2	26925.1	14258.2	74261.8	35410.2	31423.4	37996.2	29324.6	12634.5	39167.7	36562.6	41620.7	28570.7	41940.7	76767.7	45336.4	32633.4	45312	38171.3	45616.7	10311.6	42927.6	35615	39996	42248.2	30096	32940.1	31839.8	50742.6	71079.7
	445-131-88-1014.09	16.902	116	68173	24377.9	13759	18435.2	10965.2	54230.3	20086.8	34033.6	20803.3	NA	9073.19	9274.86	26607.7	14922.9	NA	11830	10001.7	11006.3	8518.19	17616.8	NA	10368.8	10802.3	11226.7	13921.5	14928.9	11917.6	13658.6	9696	10696.3	13058	10936.1	11543.2	8797.24	10883.3	5946.67	12819.2	8991.05	10684	11912.7
	498-343-39-1014.73	16.912	498	NA	NA	NA	NA	NA	NA	NA	NA	NA	NA	9010.38	NA	10246.4	9093.76	NA	NA	6233.76	NA	5874.95	9010.86	NA	NA	NA	NA	NA	NA	NA	NA	NA	NA	NA	NA	NA	NA	NA	NA	NA	NA	NA	NA
	204-79-0-1016.83	16.947	204	NA	426910	200695	249453	160016	NA	NA	NA	441509	344201	171984	194402	NA	NA	186166	NA	NA	178384	171888	NA	NA	NA	NA	NA	NA	NA	NA	NA	NA	NA	NA	194292	NA	131114	194230	124502	157455	134353	194233	NA
	417-245-86-1018.80	16.98	417	1001973	938782	635917	892273	439078	833050	1.0003e+06	484492	691498	557108	730914	666212	1.49237e+06	858394	610346	704701	701521	716017	679029	952032	459354	597390	756725	671805	769161	824082	696899	578928	626932	707450	907695	584588	725625	604556	699454	448626	630463	437169	667823	573517
	204-146-0-1020.62	17.01	204	NA	497381	197183	254025	NA	207375	324642	NA	NA	418869	285924	303720	536915	220668	211715	272862	NA	285774	280947	297056	NA	271672	290986	NA	240703	NA	216598	211923	273738	NA	NA	NA	NA	NA	319700	206257	274596	218715	297171	NA
	100-72-54-1022.55	17.043	100	10479.3	21339	NA	11499.9	8485.24	11905.9	NA	NA	NA	17603.3	11738.9	11071.2	27327.3	14638.1	16254.9	12975.1	11875	NA	12589.3	17342	NA	NA	13465.2	11660.4	15158.6	15010.8	13695.4	6942.24	11418.1	NA	15211.6	10141.3	13645	12964.4	13558.5	8815.57	NA	NA	14489.2	9937.62
	85-71-78-1024.72	17.079	71	25426.1	66433.4	36155.8	24840.3	20729.6	34333.1	33815.3	23650.7	31747.7	86569	22716	23760	25734	30262.5	29765.3	22624	24392.9	29234	26763.2	31084.5	23417.8	27665	29313.6	24075	24875	26047.9	28059	28335.9	26475.2	28772.2	36047.6	34526.8	36090.1	25410.6	29893.5	28058.9	30091.3	21676.6	31877.6	33398.3
	204-117-29-1026.17	17.103	361	33992.9	60049.6	30771.3	43063.6	23166.2	34228.5	43773.4	19770.7	36398.1	53696.2	33078.4	39876.3	77876.4	50782.4	38538.1	37450	41157.2	47395.4	37089	46876.6	22281.1	32904.7	32474.7	36062.7	36659	40685.8	31621.3	28796.6	28605.6	27752.6	34557.4	33046.4	31583.7	27929.2	34826.2	27160.3	28617	29474.5	38467.5	28199.3
	172-100-53-1027.67	17.128	172	39019	62738.9	38950.2	NA	24615.2	NA	NA	23611.3	NA	NA	NA	NA	NA	NA	NA	NA	NA	NA	NA	NA	NA	NA	NA	NA	NA	NA	NA	NA	NA	NA	NA	NA	NA	NA	NA	NA	NA	NA	NA	NA
	191-103-62-1028.63	17.144	331	254246	442977	231888	313065	176933	240585	327464	151273	275404	260410	258245	288713	503038	286572	254278	280563	280407	295983	251170	334839	183387	255667	268364	255262	298431	302693	296893	245443	246154	240708	260633	268862	281608	221785	295373	223531	259858	254106	273670	232310
	383-102-16-1029.55	17.159	526	3537.86	6243.67	3883.9	4175.71	NA	NA	4490.95	NA	4830.48	4906.29	NA	NA	NA	NA	NA	NA	NA	NA	NA	NA	NA	NA	NA	NA	NA	NA	NA	NA	NA	NA	NA	NA	NA	NA	NA	NA	NA	NA	NA	NA
	217-204-92-1030.44	17.174	204	796965	1.24164e+06	492792	708322	389380	584841	754971	409651	583501	755350	529613	540006	1.06991e+06	560390	539811	544991	531332	540994	576223	758262	362568	453130	548105	670405	646824	636662	591702	499675	536651	525927	760687	495895	837901	480019	711073	396982	563960	517335	594642	502900
	433-245-23-1031.19	17.186	433	422000	NA	245575	319219	128131	301325	232413	114046	277643	973124	92493.4	126094	790018	200528	150733	142463	197865	162279	183609	232949	26351.4	78037.3	116056	134392	152583	146082	100684	98400.8	96781.9	97869.1	199993	116016	246848	85761.8	114931	56590.8	127963	121136	115280	93890.1
D-glucose-6-Phosphate MX2	387-129-75-1034.77	17.246	129	38463.1	27734.6	43507.8	40806.6	25680	43497.9	57072.4	42649.3	59149.6	22794.9	31062	27305.6	84114.3	47669.3	30339.3	31923	54733.9	37693.8	29978.5	44109.3	20006.4	30236.7	30770.4	55110.6	42934.5	44897.8	27856.5	37627.2	27090.6	38283.9	46136	43486.7	73863.5	28067.8	36192.4	23172.1	27690.5	32227	31785.2	38409.6
	245-105-37-1035.49	17.258	245	NA	NA	NA	NA	NA	NA	NA	NA	NA	NA	NA	NA	NA	NA	NA	NA	NA	NA	NA	NA	NA	NA	38156.1	36463.2	NA	37789.3	39194.6	30748.5	NA	39641	NA	NA	NA	NA	NA	NA	NA	NA	NA	NA
	262-203-34-1038.94	17.316	421	4472.29	10421.6	4892.48	6578.71	3713.48	5615.81	7813.67	3753.67	6452.24	7137.05	6572.48	6606.71	11663.5	7108.43	6115.19	6130.9	7183.62	6965.48	5661.86	7856.38	4339.9	5799.71	6020.24	5605.43	7448.71	8117.48	7030.1	6977.67	5396.86	5402.62	5544.81	6970.62	8303.05	6198.38	8024.71	4647.33	6354.24	6499.05	7476.62	6710.1
	204-91-57-1041.11	17.352	204	593362	1.17232e+06	571481	831331	494820	627851	1.39319e+06	432783	771042	1.2074e+06	755677	993032	1.90327e+06	879184	1.22334e+06	782472	891722	787352	776703	1.04577e+06	466393	571048	571116	889069	870612	892280	691686	618459	639922	577507	761953	691488	1.22202e+06	650144	942392	412311	617313	506758	798204	605489
	307-290-58-1041.83	17.364	307	15958.2	33057.7	NA	NA	NA	15943.6	28365.5	13335.1	NA	24751.6	NA	NA	NA	NA	NA	NA	NA	NA	NA	NA	12089.4	18269.6	NA	18788.6	NA	23328.8	NA	NA	NA	19332.7	NA	NA	25629.2	20139.7	NA	16351.3	17675.7	18214.5	23528.5	NA
	245-168-15-1042.44	17.374	245	NA	141168	57621.6	112707	62561.5	NA	138007	NA	77588	56702.8	101523	103920	91221.1	126004	78177.8	96634.5	87488	102852	67540.9	77576.7	48097.2	77861.3	96213.2	83771.3	103385	97435.6	99951.3	79832.5	94002.1	85597.7	126888	75439.2	91328.4	80029.6	110023	66858.5	87852.9	58976.8	103029	87867.3
	157-156-20-1043.17	17.386	157	NA	NA	21131	30402.8	NA	18581	32439.5	NA	20765.5	32278.9	25916.7	28273	45317.3	34337.4	NA	27481.7	31338.7	27107.2	20406.3	33538.2	NA	NA	26964.6	24521.1	32403.2	28327	25110.3	21761.1	21379.4	NA	29972.4	27961	25749	NA	29839.4	22949.7	NA	20109.2	31025.2	NA
	173-128-38-1045.31	17.422	173	NA	NA	NA	NA	NA	NA	NA	NA	NA	NA	NA	NA	NA	NA	NA	NA	NA	NA	NA	NA	NA	NA	NA	6669.81	8262.9	7445.1	NA	5913.38	NA	4794.24	NA	NA	NA	NA	NA	NA	NA	NA	NA	NA
	204-117-14-1048.92	17.482	204	334195	609947	333720	468150	255251	319948	499354	218875	368703	640264	400704	479925	860475	534429	561441	472102	480678	480059	426589	538378	268432	373443	373769	338570	476804	487225	406363	322878	381006	358823	460615	453472	489877	362791	501315	322876	378712	324789	533736	360223
	318-315-67-1050.09	17.501	318	26115	357885	103225	110388	129076	40241	70444.7	45871	79417.3	302745	83326	94900.8	84106.6	198455	91349.6	71582.2	36064.2	105417	75671.2	72162	35579.9	101155	90895.1	60824.3	100745	61842	100378	69471.2	130023	54566.2	74393.4	53637.4	63060	99734.3	139391	80541.5	190746	84786.1	122484	78691.1
	174-71-34-1051.82	17.53	174	21242	32460.7	16814.3	23890.4	12725.3	15326.2	25436.7	11889	16758.5	29476	26808.1	26357.2	32529.7	31183	21290.9	21636	26135.5	26909.3	24652	29172.9	13771	23692.8	21978.8	19069.8	26431.6	19841.7	24389.9	18471.8	21524.3	14729.9	31518.3	21678.5	15040.8	20710.8	24844.4	15822.6	22802.5	21039.7	22974.4	14906.1
	259-203-57-1053.04	17.551	259	NA	NA	NA	NA	NA	NA	NA	NA	NA	NA	5739.76	5649.81	8756.81	7684.67	NA	6070.57	8034	NA	NA	8982.52	NA	NA	NA	NA	NA	NA	NA	NA	NA	NA	NA	NA	NA	NA	NA	NA	NA	NA	NA	NA
	179-128-32-1053.97	17.566	179	NA	27754.9	11338.3	13466.6	NA	NA	10360.9	NA	9985.48	32539.7	18089.2	27430	43553	37268.6	23380.8	30319.1	14715.8	22839.3	27238.3	26583.4	NA	17329.4	21620.4	20568.4	26098.6	17132.1	29905.3	17474.7	24579.9	9672.29	30635.2	26238.8	20691.6	22929.4	48905.3	18303.2	39659.5	23602.1	14090.2	19222.8
	204-74-46-1057.36	17.623	204	299326	516020	262962	384693	209297	303299	173227	180213	122461	462077	368664	587131	875429	328824	450531	765488	399645	554563	363625	494166	203462	330648	392548	153197	216874	454202	353182	116874	312939	327498	557308	540708	321412	163906	468728	175494	328421	340063	490716	325614
	324-116-22-1058.08	17.635	324	16241.8	14055.9	NA	NA	NA	15498.6	NA	13628.2	NA	29336	NA	NA	NA	NA	NA	NA	NA	NA	NA	NA	NA	NA	NA	NA	NA	NA	NA	NA	NA	NA	NA	NA	NA	NA	NA	NA	NA	NA	NA	NA
	204-145-84-1059.96	17.666	144	23946.2	39065.6	21142.3	27909.3	17612.2	26777	36936.2	22213	28076.4	33185.3	21380.5	23530.2	46207	26535.6	35346.4	20066	26974.4	22955.4	22913	26333.7	18588.7	20783.6	20530.8	24057.1	29963.8	28334.8	22198.5	20326.8	20543.5	22997.3	21605	25993.3	30596.3	18063.8	24901.1	17293.1	21009	15627.7	24792.4	21955.9
	430-103-89-1061.95	17.699	103	83958.8	223552	102294	125570	86260.9	72143.7	144616	57329.3	106328	126007	152678	148910	211956	185171	163012	129402	127258	134748	120814	175767	87813	135205	160627	139248	174615	125679	178691	141011	144695	104601	242361	154808	163617	136409	225390	111864	155893	125318	172570	122469
	497-72-29-1062.95	17.716	497	9569.33	42524.5	12087	10456.2	NA	10062.9	13218	NA	16255.3	67810.7	NA	NA	NA	NA	NA	NA	NA	NA	NA	NA	NA	NA	NA	NA	NA	NA	NA	NA	NA	NA	NA	NA	NA	NA	NA	NA	NA	NA	NA	NA
	172-116-72-1063.69	17.728	116	14592.3	28626	14562	11161	7382.05	NA	29102.8	NA	8877.48	24432.2	11638.5	14428.7	36650.7	23045.9	NA	NA	17905.1	15671.8	13604	23108.5	6816.33	14741.4	9554.81	8633.29	9761	13350.7	10926.4	10296.9	NA	8858.1	NA	NA	NA	NA	NA	NA	NA	NA	NA	NA
	325-187-51-1064.46	17.741	325	53222.3	142404	36713.2	37978.6	21923.6	64684.1	32812	32208.6	44962.3	123797	16691.3	15399.9	36722	18642.1	9883.9	13560.7	21475.8	14076	13253.4	25129	7733.38	14446.9	15863.8	16666.4	25212.5	29063	16069.3	21645.5	17530.4	19054	28623.9	27422.4	30166.6	11129.4	29905.2	12056.2	23681.1	15744.2	17260	18168.6
	117-75-44-1065.58	17.76	117	35334.6	44502.7	30245.8	33232.2	21335.5	32756	63455.3	20672.6	26229.7	39731.9	35957.2	20622.3	44474.9	31708.9	19847.8	25604.2	54357.9	23637.5	23940.4	30918.8	19229.8	20274.8	22479	25831.1	23572.4	27839.5	20771.1	22722.4	20789	26099.4	35800.7	21953.8	30774.1	16455.2	24772.8	18208.9	20485.4	20368.6	22674	19724.2
	204-103-35-1067.91	17.798	204	NA	85899.9	NA	NA	42285	NA	NA	NA	NA	91612.1	61796.2	94922.4	NA	89739.2	108172	83686.4	NA	86331.8	90888.6	88017.5	49031.4	71920.7	74606.1	63723.3	89281.8	103754	110008	58585.7	77936.9	68841.7	111330	88035.1	109027	78417.5	106378	68344.3	78901	95890.4	110714	68355.4
	201-91-40-1069.64	17.827	201	26390.3	38290.5	28768	36442.8	19910.8	23735.1	64564	16234.4	28239.1	35680	47956.2	37326.2	82524.1	58772.4	23388.9	28071.6	64597.1	45744.7	37847.5	52270.3	17545.4	45632.7	38217.5	26334.7	37689.4	42586.5	47892.6	44007.9	31558.6	27648.3	46784.4	38174.7	45124.9	27469.2	52736.4	22149.4	50510.2	30693.9	40716.5	30130.7
	325-91-74-1070.38	17.84	325	NA	313232	54793.7	62464.2	24429.5	NA	66288.3	37298	NA	238276	25487.4	NA	68465.2	24499.2	NA	9492.05	NA	NA	25664.3	NA	NA	19807.5	NA	32811.2	37346.2	54138.2	NA	31993	NA	NA	NA	NA	NA	NA	NA	NA	NA	NA	NA	NA
	131-130-93-1071.96	17.866	130	NA	15703	7026.76	7725.14	NA	NA	8308.86	3984.24	6278.05	15991	NA	NA	NA	NA	NA	NA	NA	NA	NA	NA	NA	NA	NA	NA	NA	NA	NA	NA	NA	NA	NA	NA	NA	NA	NA	NA	NA	NA	NA	NA
	446-373-16-1074.34	17.906	448	8215.1	42602.5	8336.71	8104.57	4755.67	10403.3	17900.9	4305.86	10702.5	17097.4	6076.62	4675.33	10924.1	5657.52	NA	4157	6815.14	4166.67	NA	7774.52	4414.57	5086.33	5338.95	6038.52	6835.67	8939.43	5261.14	6843.38	5666.43	8706.05	9290.29	7951.86	7964	4490.33	8579.86	3906.9	4653.24	NA	9928.71	6699.86
	204-131-16-1076.15	17.936	361	2.76383e+06	8.81257e+06	2.39639e+06	2.30799e+06	1.15279e+06	2310021	1.71566e+06	1.25393e+06	2.7276e+06	5.1108e+06	941263	988172	1.94371e+06	1160623	653910	934553	1.35069e+06	1.04814e+06	885556	2.06134e+06	599742	1.14586e+06	1.07195e+06	1.08082e+06	1.2758e+06	1.63199e+06	1.14468e+06	1.1979e+06	872979	1.12022e+06	1.22918e+06	856037	863992	680057	1.00393e+06	622688	815968	708083	948729	932607
	335-92-92-1076.84	17.947	335	NA	NA	NA	NA	NA	NA	NA	NA	NA	NA	14264.8	14595.6	23052.5	17035.7	11333.5	14025.4	18534	14344.9	13313.3	NA	9992	14203.4	15642.8	13285.7	NA	16380	15641.7	NA	13276.4	13293.1	16399.6	13887.1	13701.1	12036.3	14608.4	NA	12109.9	12787.4	15065	14373.4
	200-156-53-1079.89	17.998	200	27446.3	34201.7	24345.7	27217.4	NA	26722.5	40363.9	17852.8	30233.5	37295.2	NA	NA	NA	NA	NA	NA	NA	NA	NA	NA	NA	NA	NA	NA	NA	NA	NA	NA	NA	NA	NA	NA	NA	NA	NA	NA	NA	NA	NA	NA
	245-171-78-1081.35	18.023	289	NA	29991.2	13175	13320.1	9137.86	NA	15047.6	9859.76	13984.6	NA	12027.9	11705.6	31367.4	14745.1	16352	15482.6	11669.4	15922	14161.4	17704.3	10981.8	14820.5	14256.5	15140.5	17115.7	20857.2	16585.4	12846	13028.9	13625.4	NA	14760.1	19811.8	NA	17611.6	13723	15790.5	16093.4	21092.3	15060.5
Unknown Dissacharide 1	204-103-20-1082.77	18.046	204	603007	1.17341e+06	606022	786388	463441	618893	1.06753e+06	425659	712594	971533	594564	767108	1.43464e+06	773512	679555	720402	833008	726925	729866	844731	448073	670066	657910	615063	796319	854461	744161	653686	637922	666919	697090	777922	749190	546266	809026	653856	628458	730407	841425	696728
	446-156-25-1084.04	18.067	446	56377.8	493564	80659.4	83421.1	51582.8	81827.4	235106	48719.6	100917	182335	60626.3	39101.4	55547.7	39774	22029.9	31656.8	65641.6	31214.5	30531	65771.7	32125.6	44723.6	42456.4	42773	58045.7	85830.6	46206.5	58083.6	44506	57512	99870.6	78751.9	70495.4	33473.4	81910.8	38518.5	47701.7	33251.7	104380	57994.5
	238-106-81-1086.36	18.106	238	7792.19	15815	4723.14	9602.29	NA	6985.43	10588.2	5033.14	6585.9	13933.8	9448.9	8647.76	20317.1	8885.19	15395	NA	7554.81	11060	12787.6	13713.5	5439.05	4945	7355.43	12263.5	9954.1	13611.8	7786.33	7395.67	9712.76	NA	11087.8	14890.1	31234.8	13901.9	20845.3	5275.57	9325.19	7144.38	13075.3	6515.67
	361-172-55-1087.52	18.125	172	108460	129362	24271.6	52379.1	28256.8	66016	57602.4	47109.9	43720	115014	177627	77221.2	489071	192969	229616	197771	48524.7	134039	251303	246459	72760.5	30151.2	164868	471064	199991	316633	152374	50429.9	129929	115544	353278	180020	226831	299099	211049	NA	154459	55071.8	261521	101615
	204-160-6-1088.62	18.144	288	NA	NA	NA	NA	NA	NA	NA	NA	NA	NA	NA	NA	9585.71	2741	4057.05	NA	NA	NA	5035.9	6964.48	NA	NA	NA	NA	NA	NA	NA	NA	NA	NA	NA	NA	NA	NA	NA	NA	NA	NA	NA	NA
	103-75-13-1089.59	18.16	259	972890	1.63203e+06	736297	800385	606166	998076	1.15306e+06	799787	954978	1.84377e+06	786706	727536	1.29588e+06	735107	459314	646749	714759	758323	574112	717393	423045	807964	683629	527977	702300	648395	815574	825661	731237	763766	1.02129e+06	666983	622828	619351	818656	586812	812820	632457	967813	699923
	122-97-99-1092.63	18.21	122	NA	64171	57768.1	49150.6	91760.8	NA	NA	NA	50113.5	NA	44157	60310.6	NA	61116.7	59126.9	58943.9	77257.1	77496.4	82778.7	61747.1	48809.2	50417.3	35221.7	42444.4	71288.9	43798.8	58354	52237.3	94239	35098.6	NA	54296.6	68715.9	76921.1	124727	81997.6	66316.7	71799.4	66361.3	63695.5
	217-117-86-1093.92	18.232	129	2.10461e+06	2.74432e+06	1.69035e+06	2.02838e+06	1.58939e+06	2.21616e+06	2.61348e+06	1.61226e+06	2.04667e+06	2.67425e+06	2.03727e+06	2.03574e+06	2.67275e+06	2.25994e+06	1340606	1.99582e+06	2.13079e+06	2.23852e+06	1.62457e+06	2.21564e+06	1.60813e+06	2.42428e+06	2.26161e+06	1.79831e+06	2.14843e+06	2.34946e+06	2.40041e+06	2.30284e+06	2.10356e+06	2.36997e+06	2.89469e+06	2.24012e+06	1.71028e+06	2.01385e+06	2.1677e+06	1.92847e+06	2.24718e+06	2.02177e+06	2687260	2.10315e+06
	391-303-20-1094.56	18.243	391	NA	NA	NA	NA	NA	NA	NA	NA	NA	NA	16312.9	17824.1	21326.3	18745.5	NA	NA	NA	16570	NA	NA	NA	NA	NA	NA	NA	NA	NA	NA	NA	NA	NA	NA	NA	NA	NA	NA	NA	NA	NA	NA
	463-417-30-1095.25	18.254	492	18703.5	42440.9	9662.76	14846.3	7627.05	14926	13365	8249.24	12299	18424.9	9228.38	11068.5	17294.9	10834.6	4906.67	NA	7654.05	8300.9	6339.52	10992.2	NA	9966	8647.19	5475.33	10751.9	8100.24	11674.9	9685.57	8904.71	NA	13682.2	7709.43	5285.24	5044.86	10967.9	NA	10778.9	8188.81	9636.33	7908.81
	204-103-10-1097.79	18.297	204	671583	1.27189e+06	752623	897531	556245	729473	1.20473e+06	504090	857469	1.16712e+06	644425	813274	1.52802e+06	782310	682509	741365	987161	757824	708894	882193	445395	742607	653122	549405	795159	786953	670328	699855	614224	626095	598972	683673	565567	414638	648991	609996	558118	595192	701718	569667
	387-299-62-1099.75	18.329	387	18695.2	10547.3	17865.4	21735.3	11422.2	21155.4	35327.5	24522.4	21463.4	NA	24157.3	17290.4	31021.5	23639.7	13751.5	18619.8	25543.3	19252.8	16221.2	27474.6	11903	14881.6	18741.8	18595	21037.3	25430.4	19565.4	18996.4	17732.4	23313	34984.4	22694	20920.2	19015.4	21566.4	14438.9	18706.2	20103.4	29784.1	21835.5
	186-71-82-1101.09	18.351	71	7392.38	15558.4	5746.57	9891.19	6494.81	9060.43	NA	6947.1	8122.76	21831.1	NA	NA	NA	NA	NA	NA	NA	NA	NA	NA	NA	NA	NA	NA	NA	NA	NA	NA	NA	NA	NA	NA	12435.4	NA	9220.38	7542.62	7634.76	NA	9292.05	9570.29
	217-189-15-1101.76	18.363	217	NA	NA	NA	NA	NA	NA	NA	NA	NA	NA	NA	NA	NA	NA	NA	NA	NA	NA	NA	NA	NA	NA	NA	NA	NA	NA	NA	NA	NA	NA	NA	NA	NA	288265	298709	226301	221430	330691	NA	NA
	319-189-19-1101.88	18.365	319	65776.7	NA	28483.7	NA	43308	59834.2	NA	54367.5	45316.5	73867.3	100545	NA	23607.9	119443	36305.6	91336.1	90964.1	79241.2	23985.4	68801.7	28370	NA	NA	NA	96743.1	46253	NA	194454	42210.5	100499	61440.9	81890.3	40091.3	NA	NA	NA	NA	NA	90922.9	54128.7
	272-133-59-1102.94	18.382	272	NA	NA	8875.48	22108.4	NA	NA	39296.7	NA	20404.5	NA	32313.9	25031.6	19192.1	NA	5664.52	22633.5	NA	20176.1	12470	NA	NA	NA	NA	27948	29893.9	26467	38852.7	63193.6	NA	30073.1	11949	28678.8	27885.5	44586.5	15054.1	22162.8	19567.1	59634.9	27531.8	21696.8
	217-129-29-1105.06	18.418	217	183028	403982	142503	389423	139661	140613	451884	216409	266610	219864	268334	251231	135090	319861	156725	293332	439492	329614	131365	171359	177012	268611	431775	412141	262139	249548	358849	356391	340146	228820	270166	302460	197676	343913	353672	271817	196020	439118	480663	331577
	383-75-61-1106.00	18.433	383	9083.33	32158.4	NA	NA	NA	NA	15285.6	NA	14470.7	41266.7	NA	NA	NA	NA	NA	NA	NA	NA	NA	NA	NA	NA	NA	NA	NA	NA	NA	NA	NA	NA	8869.48	NA	10829.9	8817.43	11996.7	NA	10857.3	NA	NA	NA
	149-71-24-1107.73	18.462	70	26782	58245	24086.1	23705.1	37071.5	24968	55686.7	22391	21580.3	91112	40600.5	39781.2	31034.6	46357.4	37490.8	14916.9	21073.4	36303.3	21261.7	21585	15395	23980.1	22433.3	14294.5	19411.6	32227.9	34372.9	20074.6	19294.8	14230	47820.8	19569.5	21057.1	24539.2	44852	15313.6	21730.4	33195.7	33941.6	16982.2
	287-253-18-1108.96	18.483	349	NA	NA	NA	NA	NA	NA	NA	NA	NA	NA	NA	NA	NA	NA	NA	NA	NA	NA	NA	NA	NA	NA	NA	NA	NA	NA	NA	NA	NA	NA	9329.24	8674.24	11362.4	NA	NA	6217	NA	7084.1	9969.71	6788.57
Unknown Dissacharide 2	361-217-51-1109.87	18.498	361	690600	1.5961e+06	376247	485081	324536	492263	601437	374158	472768	1.12853e+06	607093	483987	1.35735e+06	604780	1.02322e+06	576294	299750	600753	840436	684518	276282	311124	531267	544445	612892	631816	500296	301543	476007	416498	682025	439343	807019	497060	714388	149824	523037	270277	711552	328875
	219-117-21-1110.92	18.515	535	NA	NA	8058.52	9903.67	NA	8982.86	14078.7	NA	9171.14	NA	NA	NA	NA	NA	NA	NA	NA	NA	NA	NA	NA	NA	NA	NA	NA	NA	NA	NA	NA	NA	NA	NA	NA	NA	NA	NA	NA	NA	NA	NA
	535-254-59-1110.94	18.516	535	NA	NA	NA	NA	NA	NA	NA	NA	NA	NA	8856.76	NA	17037.5	9949.05	7108.81	8768.1	NA	9668	8534.67	10846.1	NA	NA	NA	NA	NA	NA	NA	NA	NA	NA	11568.6	8268.95	10307.2	8202.29	10744.8	NA	9124.14	NA	11101.3	NA
	363-117-83-1112.08	18.535	117	NA	208565	181573	203865	155342	NA	259605	NA	216550	142460	234382	213088	186854	160935	165045	257788	184680	139236	136581	286786	185825	218076	213539	338147	253504	287474	245765	201070	233779	234423	192320	275898	391854	324801	228530	168250	202974	224357	326062	233978
	141-72-15-1112.93	18.549	141	NA	34060	25398.4	NA	NA	12427.8	NA	14589.5	32566.8	30223.6	NA	NA	NA	NA	NA	NA	NA	NA	NA	NA	NA	NA	NA	NA	NA	NA	NA	NA	NA	NA	NA	NA	NA	NA	NA	NA	NA	NA	NA	NA
	186-128-20-1114.48	18.575	186	16941.2	82013.4	37080.4	50741.1	26747	11579.8	26111.8	33378.8	28605.5	167542	18881.6	28605.3	10046.7	33239.9	NA	7273.62	10885.3	36007.8	48861.4	28173.2	NA	28491.3	21358	21591.5	26279.3	NA	31944.8	17235.7	22521.9	NA	23331.3	25441.2	25230.5	NA	40302.6	19060.2	44592.9	29065.5	NA	14484
	221-207-40-1116.42	18.607	221	5817.67	28777.6	16031.6	27650	35523.6	11716.7	32630.5	14954.7	14323.5	29535.2	19112.1	48950.7	24892.6	22484.4	20559.5	22601.7	28770.7	24606.5	20995.4	30809.2	45490.2	24022.6	18796.2	17977.7	13553.4	24150.5	42514.7	19181.5	34604.8	26730.8	22232.6	24785.3	28865.7	27446.4	37780.8	16240.6	29778	25874.7	29241.6	8950.95
	217-204-45-1118.30	18.638	363	173377	233063	230403	215324	271272	255659	195245	207203	181581	207225	406600	334020	211120	343770	187642	153176	450953	253496	214449	225795	233695	131534	335774	245232	359689	181480	196307	430320	167490	353292	183828	176096	119144	304976	319067	310561	373034	161322	137198	349688
	285-259-34-1119.13	18.652	285	NA	NA	NA	NA	NA	NA	NA	NA	NA	NA	NA	NA	18691.8	21642	13857.4	NA	9221.24	21665.2	20091	NA	NA	NA	NA	NA	NA	NA	NA	NA	NA	NA	NA	NA	NA	NA	NA	NA	NA	NA	NA	NA
	71-69-16-1120.39	18.673	71	10888.5	17403.3	11837.8	12142.1	13093.1	NA	13261.6	NA	11765.8	26477.8	11868.5	10302.5	NA	11842	12063.7	11420.2	11771.6	10603.8	11995.5	NA	11835.7	12806.4	10876.9	NA	11851.5	NA	10354.1	13065.6	11154.6	NA	12128	NA	12035.7	12424.8	NA	11836.1	NA	9238.86	11456.2	NA
	287-194-82-1121.59	18.693	287	16053.8	30832.4	9548.67	NA	NA	14526	NA	13542.3	NA	30900.7	17345.2	NA	26652.5	11959	8829.57	11304.6	19119.4	NA	9398.71	18357	NA	10219	9069.33	10443.9	NA	14018.8	NA	11152.8	9118.57	10163.3	NA	12051.2	15165.5	10941.7	NA	NA	NA	NA	11072.1	9689.71
	217-129-26-1124.35	18.739	217	251419	485970	150560	489115	160664	285039	391609	319984	254030	229468	429502	346488	164171	517960	150440	443236	524443	536470	193789	212830	100671	319284	497660	393520	304042	275536	447905	430514	376784	337935	281012	277334	267211	391860	348933	334777	316969	555368	479568	280262
	356-70-86-1130.85	18.847	356	22340.4	NA	31314.2	32748	25691.6	25856	46287.6	24967.1	42121.5	NA	28494.2	26621.7	26633	31280	24342.1	26943.6	42974	29077.1	19374	42466.4	28817.3	31639.8	28999.6	31097.1	30254.5	35675.3	30169	36070.6	27830	39214	21450.2	33242.8	34454.5	26854.4	24737.2	28183.9	21839.6	29797.5	33821.4	33302.3
Sucrose (HP)	361-217-40-1131.24	18.854	217	1.23481e+07	1.16051e+07	1.0276e+07	1.07185e+07	9.49186e+06	1.03335e+07	1.20864e+07	1.23912e+07	1.26542e+07	1.27419e+07	1.18158e+07	7.67861e+06	1.27302e+07	1.12338e+07	1.00928e+07	1.15473e+07	1.14511e+07	7.84367e+06	1.00378e+07	1.30887e+07	1.21924e+07	1.21745e+07	9.71862e+06	1.19887e+07	1.2103e+07	9.0615e+06	1.04828e+07	1.22424e+07	9.73259e+06	9.44262e+06	5.71263e+06	1.2039e+07	8.63055e+06	10753144	1.2298e+07	8.63393e+06	8.21496e+06	1.13613e+07	9.14571e+06	9.08306e+06
	71-63-2-1131.78	18.863	71	NA	NA	NA	NA	NA	NA	NA	NA	NA	NA	NA	20303.2	NA	22882.7	33013.8	20882.1	NA	19308	29536	NA	30725.4	23676.3	42379.7	24450.8	22384.8	NA	41991.8	21016.9	23021.4	NA	34479.1	32558.5	23571.5	25862.5	27766.6	33876	25302.4	21699.8	22118.2	NA
	174-102-22-1132.70	18.878	174	93791.9	87443	59350.8	72089	39746.3	76644.2	41222.4	50231.6	51776	146489	48683.5	NA	105209	72980.9	36967.4	NA	58865.2	60818.1	NA	78141.7	NA	NA	46450.2	39795.3	53677.3	41624.5	59223.4	44349.2	NA	NA	NA	NA	32814.9	NA	47447.5	31080.6	NA	34532.5	39883	34171
	423-128-25-1134.22	18.904	423	14522.3	NA	NA	15737.8	9067.19	13633.2	19991.3	8444.24	16057	NA	NA	12229.9	NA	12023.3	10367.5	NA	NA	11960.5	12062.6	NA	NA	NA	NA	NA	NA	NA	NA	NA	NA	NA	10583.5	NA	11551.5	NA	12344.3	9535.57	10707.1	NA	NA	NA
	284-212-28-1135.94	18.932	284	18356	30968	20930.3	19774.6	10100	17878.5	20626.6	15289.8	18197.7	36812.3	18676.6	16053.9	28981	17719.8	16412.1	14907.7	20673.6	18863.3	16516.3	17971.5	10825.3	15482	14747.8	12730.5	16329.6	14654.6	13925.4	16351.3	16339.8	14800.1	15830.6	12870.6	16631.3	15117.6	18542.3	11450.1	14263.8	12876.5	15263.9	15628.5
	179-174-22-1136.87	18.948	179	NA	NA	NA	NA	NA	NA	NA	NA	NA	NA	NA	NA	NA	NA	NA	NA	NA	NA	NA	NA	8384.76	8512.95	NA	11886.4	14416.3	14902.9	13790.1	13244	10114.5	16194.5	NA	14934.1	23584.8	18325.7	24858.5	NA	15426.9	9646.81	19545.5	17492.8
	204-129-16-1137.76	18.963	204	289942	492132	242112	324515	168460	271327	566139	NA	502618	424369	178148	190489	364086	191663	169145	168961	423548	174014	158413	474838	183902	187944	176436	291758	291878	274464	193367	288335	152220	244277	174454	229162	227488	131077	165258	125355	146445	145398	172267	259969
	75-74-73-1139.88	18.998	75	96670.6	121752	65589	100356	55653.3	79571.8	137913	121466	169945	114175	60766.6	56433.8	77087.4	62904.2	57704.3	49696.2	78148.6	64616.3	48802.8	101765	73100.2	86480	79491.1	61612.1	81137.1	65599.3	105979	73585.4	57273.2	56210.4	69060.7	75722.7	50225.2	63830.7	50950.7	35598.7	NA	NA	70890.6	70816.3
	259-160-44-1140.46	19.008	160	NA	NA	NA	NA	NA	NA	NA	NA	NA	NA	NA	NA	NA	NA	NA	NA	NA	NA	NA	NA	14362.7	NA	NA	27547.5	21057.5	18996.4	NA	19357	NA	17744.1	NA	NA	NA	NA	NA	NA	NA	NA	NA	NA
	361-204-9-1142.45	19.041	361	NA	1.14973e+06	1.43616e+06	1.05827e+06	889891	NA	714992	NA	NA	758711	362320	442981	523955	317638	142995	261737	NA	207993	228002	692701	NA	842664	957514	327925	998777	588806	1.16836e+06	1.2939e+06	1.0126e+06	1.17919e+06	755390	987121	408692	225273	851887	740578	925589	1.08999e+06	850872	1.07503e+06
	271-243-62-1142.90	19.048	451	22723.1	35307.8	26007.2	NA	NA	27842.2	NA	14653.6	NA	NA	NA	NA	NA	NA	NA	NA	NA	NA	NA	NA	NA	NA	NA	NA	NA	NA	NA	NA	NA	NA	NA	NA	NA	NA	NA	NA	NA	NA	NA	NA
	451-284-68-1143.12	19.052	451	NA	NA	NA	NA	NA	NA	NA	NA	NA	NA	NA	NA	NA	NA	NA	NA	NA	NA	NA	NA	NA	20370.1	NA	NA	NA	NA	24076.7	31432.4	23593.4	23449.4	NA	NA	NA	NA	NA	NA	NA	NA	NA	NA
	204-191-21-1144.49	19.075	363	152977	NA	NA	NA	NA	137260	79487.1	83575.6	NA	NA	59708	55972.3	71853.1	36491.8	22397.3	38236.8	53419.4	33093.6	26458.2	85621.2	58120.8	75331.5	98963.4	40798.9	98348.5	71349.5	115966	144077	101160	122232	89988.5	154838	53330.6	35069.8	NA	NA	NA	NA	98057.9	NA
	363-117-21-1144.59	19.076	363	NA	109286	143371	116238	81757.3	NA	NA	NA	122211	71364.2	NA	NA	NA	NA	NA	NA	NA	NA	NA	NA	NA	NA	NA	NA	NA	NA	NA	NA	NA	NA	NA	NA	NA	NA	NA	NA	NA	NA	NA	NA
	361-217-62-1147.45	19.124	103	264539	407262	NA	NA	NA	239498	333141	170250	241845	422503	155228	126650	222521	142166	74355.3	105485	200781	138920	95406.9	207076	NA	236522	159547	131582	80174.9	183945	164553	96503	155201	227823	245834	121681	139387	104997	151350	113638	146906	170624	167758	159209
	361-217-11-1147.48	19.125	361	NA	NA	715284	1.04008e+06	502780	NA	896654	NA	766410	NA	NA	NA	NA	NA	NA	NA	NA	NA	NA	NA	NA	NA	NA	NA	NA	NA	NA	NA	NA	NA	NA	NA	NA	NA	NA	NA	NA	NA	NA	NA
	70-68-3-1150.10	19.168	70	12204.9	14309.5	26335.5	25775.3	NA	6453.62	NA	NA	25244.5	9002.67	39555.2	6629.57	43042.1	13629	NA	16858.3	NA	NA	NA	56395.9	NA	7390.95	10431.8	NA	22490.2	NA	5876.52	53781	4430.57	36819.6	31629	25966.8	8734.43	5051.57	11273.8	8787.57	NA	16156.6	12725.4	24569.6
	204-202-5-1152.31	19.205	204	649574	NA	NA	547517	NA	552983	410895	NA	NA	893364	302270	274384	501452	290499	175051	230979	328867	235912	259362	421627	NA	NA	NA	NA	NA	NA	NA	NA	NA	NA	545510	569663	354118	264330	641513	NA	361455	NA	397772	NA
	217-117-58-1153.84	19.231	363	365081	NA	NA	357693	257552	307145	268530	227913	385241	216509	231869	249320	304655	157361	157136	185147	184856	218538	216252	310500	222723	296811	350094	227358	397776	296490	435814	425594	405861	NA	370455	580895	263770	242850	420271	361596	388154	458819	347524	451378
	361-169-6-1154.53	19.242	361	1.08907e+06	1565024	1.47023e+06	1.12755e+06	976622	1.29016e+06	936495	730053	1.10742e+06	986292	NA	NA	NA	NA	NA	NA	NA	NA	NA	NA	674432	968615	NA	420913	NA	766626	NA	1.72215e+06	1.03361e+06	1.49482e+06	NA	NA	NA	NA	NA	845648	924215	1.10134e+06	902475	1.30289e+06
	259-169-42-1154.83	19.247	259	NA	NA	NA	NA	NA	NA	NA	NA	NA	NA	39255.5	NA	NA	NA	39705.2	42633.2	NA	48099.2	39849.8	NA	NA	NA	56485.2	52697.3	54101.7	NA	60211.2	NA	NA	36618.9	44408	47733.1	61354.3	64933.2	67752.4	NA	NA	NA	NA	NA
	204-199-3-1156.41	19.273	204	NA	NA	NA	NA	NA	NA	NA	NA	NA	NA	NA	NA	345311	NA	162290	NA	270703	202522	166665	353803	NA	NA	NA	NA	NA	NA	NA	NA	NA	NA	NA	NA	NA	NA	NA	NA	NA	NA	NA	NA
	355-281-83-1161.02	19.35	355	9896.67	NA	15901.8	29920.9	33282	16996.9	30149	18357.5	29528.6	39476.3	NA	30360.9	12430.2	NA	15004	NA	NA	NA	25598.9	36834.6	41728.8	28870.3	21556.6	NA	NA	25196.8	35632.7	24932.2	35951.2	41895.5	14915.3	27684.3	NA	NA	33975.7	21080.1	32937.3	15809.5	16417.1	NA
Cellobiose 2	361-204-89-1161.93	19.365	217	4.91238e+06	6514530	5.53115e+06	5.02012e+06	4.67368e+06	4.89044e+06	5.34948e+06	3.34613e+06	5.7206e+06	4.46651e+06	2.24982e+06	2.48848e+06	2.82577e+06	2.19102e+06	1.06942e+06	1.59044e+06	3.05117e+06	1.42679e+06	1.46454e+06	3.72479e+06	3.04753e+06	4.95125e+06	4.3792e+06	2.89812e+06	4.63815e+06	4.04587e+06	5.01794e+06	5.61232e+06	4.71461e+06	5.2265e+06	4.30681e+06	5.9865e+06	3.30528e+06	1.79087e+06	4.27824e+06	5923829	5.61468e+06	5.74574e+06	3.9377e+06	6.06241e+06
D-trehalose	361-217-33-1168.13	19.469	361	269583	1.85382e+06	NA	NA	332874	492523	1.06942e+06	1.908e+06	397399	1.52678e+06	7.32401e+06	919484	254827	647216	335738	183494	590780	483043	1.29643e+06	2.12479e+06	845583	NA	NA	124552	640832	583043	1.1801e+06	339783	378314	733265	222037	NA	363849	1.04598e+06	342714	860290	NA	445723	2.26238e+06	242362
	137-102-7-1170.94	19.516	137	7296.52	11109.3	6167.48	7015.52	5497	7040	7651.48	NA	6177.67	11030.9	13250.3	13176.6	31802.6	20257.6	17963.1	15093.5	NA	14346	14284.8	14235.3	8322.14	10236.1	11816.3	11719.2	13744	14841.6	12204	11318.4	9075.57	11400.6	17238.9	15494.2	19737.9	18467.4	14493.2	10424.7	12032.7	12648.8	16347.8	11681.5
	285-85-93-1172.60	19.543	285	NA	NA	NA	NA	NA	NA	NA	NA	NA	NA	23303.1	41519.5	67223	36823.1	21875.5	48553.6	53366.1	35785.6	16309.7	23665	23554.2	15098.5	19515.6	20052.2	21260.5	19729	16946	39026.1	11835.8	18002.3	NA	NA	NA	NA	NA	NA	NA	NA	NA	NA
Unknown Dissacharide 3	204-103-28-1174.46	19.574	361	2.90297e+06	7.65843e+06	3.16578e+06	2.5454e+06	2.20352e+06	2.88621e+06	2.9819e+06	1250683	3.50813e+06	4.12159e+06	1007771	1.05365e+06	1.56612e+06	975552	585320	753724	1.2493e+06	695248	741329	1.48013e+06	989191	2.1897e+06	1.87747e+06	1.03486e+06	1.89402e+06	1.52949e+06	2.3583e+06	3.27567e+06	2.41431e+06	2.33388e+06	1.96274e+06	3.76751e+06	1.23279e+06	735224	1.91039e+06	3.80859e+06	3.59989e+06	3.58814e+06	1.50346e+06	4.21105e+06
	193-173-74-1176.44	19.607	411	42194.6	387127	38264.6	48525.4	38309.2	44448.7	NA	NA	42319.7	408712	NA	NA	NA	NA	NA	NA	NA	NA	NA	NA	NA	NA	NA	NA	NA	NA	NA	NA	NA	NA	NA	NA	NA	NA	NA	NA	NA	NA	NA	NA
	319-307-43-1176.72	19.612	307	NA	NA	NA	NA	NA	NA	NA	NA	NA	NA	79787.3	73355.8	NA	75581.9	49035.7	50739.8	91492.8	47191.5	50430	NA	74723.7	117765	99727	75017.2	103819	NA	140159	166339	NA	NA	130463	266670	74650.9	59893.1	195185	219811	193818	311986	85811.5	284061
	433-262-59-1177.40	19.623	523	8461.14	26034.8	10728.8	12263.3	6725.48	10012.2	17023.3	NA	10259.9	17987.2	13079.1	12535	NA	13757.6	NA	9183.86	NA	11513.9	NA	12341.9	NA	NA	NA	NA	NA	NA	NA	NA	NA	NA	NA	NA	NA	NA	NA	NA	NA	NA	NA	NA
	273-183-36-1179.31	19.655	273	NA	NA	NA	NA	NA	NA	NA	NA	NA	NA	NA	15697.5	17133.8	17695.7	NA	15086.5	NA	14527	NA	NA	NA	NA	NA	NA	NA	NA	NA	NA	NA	NA	NA	NA	NA	NA	NA	NA	NA	NA	NA	NA
	348-217-80-1180.29	19.671	355	833839	1038738	614153	796941	512859	841225	744371	472348	641965	1.45256e+06	535627	743635	1455761	646332	689111	687146	485452	765767	778410	814763	298369	535808	592422	451279	580636	604988	593190	486126	577909	432659	646853	478517	550505	494419	589847	352444	498668	410109	583579	354140
	204-191-11-1181.27	19.688	361	985671	4.40875e+06	1.01527e+06	640430	445717	1.00285e+06	603344	278685	1.08886e+06	3.58256e+06	145371	183380	511285	186246	108859	140077	254246	145551	197892	315280	84870.6	303248	328658	146245	314420	271143	292832	470835	321142	370220	333307	530632	294137	119068	250689	424039	449935	640206	240317	589274
	160-82-58-1183.61	19.727	160	12306.4	17429	10716.3	NA	7458.67	11845.3	13036	NA	12027.3	NA	NA	NA	NA	NA	NA	NA	NA	NA	NA	NA	6511.62	NA	8783	8929.71	9467.43	9528.24	NA	10294.2	10389.4	10416	NA	NA	NA	NA	NA	NA	NA	NA	NA	NA
	361-217-41-1184.70	19.745	361	648253	1.25735e+06	548224	557773	356573	529322	616438	379283	497075	1.0418e+06	654246	647152	1.23503e+06	726729	539415	711960	723059	625263	700394	752105	422568	591251	584568	509289	640640	574070	620597	616605	528749	595041	792525	629669	575948	570798	812102	555850	713678	562257	626419	607284
	361-217-48-1189.57	19.826	361	794409	1.50271e+06	693747	707354	420967	671067	787140	522936	609747	1.50446e+06	842569	860946	1.83129e+06	1.0138e+06	714138	987147	1.059e+06	839133	864472	1.0743e+06	505210	700077	711092	606953	805521	681109	792445	790279	633590	694684	1.01308e+06	813075	697354	707686	991453	560492	687308	656931	673078	660042
	204-160-6-1191.82	19.864	160	22545	NA	19047.6	26552.3	15300	21779.1	33034.4	14491.4	21668.9	NA	20099.9	22423.2	39623.9	23626.1	20898.1	20558.2	26449.5	20262.1	20588.7	28559.4	15401.1	20714.2	19835.7	21930.7	24090	24972.1	23269.5	23148.2	22484.4	22348.7	29931	59044.9	30837.7	15949.9	59109.6	19013.8	27065	NA	25514.2	20854.8
	236-175-62-1195.88	19.931	236	23648.4	11158.8	14400.5	17149.8	9633.05	22572.9	18380.4	17847.4	14728.4	18842.9	12128.4	11039	30913	11736.4	7904.52	12513.7	13133	10693.4	13197.5	14741.6	NA	9248.9	11079.1	8088.24	10177.5	10418.7	13325.5	8529.76	11279.7	8255.33	18442.4	8950.86	7870.33	6780	12760.4	NA	12489	8860.81	8569.05	8938.1
	71-69-26-1197.10	19.952	71	1.02938e+06	1.02569e+06	1.02617e+06	1.3013e+06	1.05601e+06	1.07804e+06	746549	1.06312e+06	1.00116e+06	939552	1.33409e+06	1.06976e+06	1.00681e+06	1.05458e+06	1.10709e+06	1.0062e+06	867600	1.40961e+06	1.06762e+06	945767	895711	1.04129e+06	1.22259e+06	964588	1.00767e+06	945120	1.08436e+06	1.00036e+06	1.07017e+06	966417	955497	927528	989025	1.05179e+06	1.07096e+06	1.22454e+06	1.03379e+06	1143820	976706	1.00197e+06
	361-217-57-1197.86	19.964	361	NA	352126	89558.4	81738.7	52649.4	NA	103355	54349.6	72732.8	296023	111629	104112	150145	103640	69583.9	98039.7	124429	97111.2	93437.4	129982	61530	94823	89877.5	79255.4	109999	89056.9	94871.5	112942	89087.9	NA	158902	114275	90028.8	70229.6	NA	55352.1	72690.8	78674.3	93244	74630.6
Unknown Dissacharide 4	204-129-4-1200.81	20.013	204	436992	NA	228624	299935	169676	331947	664803	293357	615849	NA	NA	155178	NA	NA	73471	105774	292850	NA	85847.9	375239	477310	253814	288140	366513	954939	585985	221836	594529	248224	563054	NA	391005	486219	NA	302756	NA	124535	170488	NA	416322
	221-207-33-1202.26	20.038	355	NA	NA	NA	NA	NA	NA	NA	NA	NA	NA	NA	NA	NA	NA	NA	NA	NA	NA	NA	NA	18188.1	4725.86	NA	NA	NA	10494.2	8567.48	NA	7019.81	8657.52	NA	9162.76	8520.24	NA	7055.67	NA	6766.71	NA	4924.62	NA
Unknown Dissacharide 5	361-205-56-1205.77	20.096	103	NA	NA	NA	NA	NA	NA	NA	NA	NA	NA	NA	NA	NA	NA	NA	NA	NA	NA	NA	NA	71042.3	NA	NA	NA	128582	109702	139260	160780	141795	180609	135511	79117.7	92717.5	101109	159131	80717.5	101754	106415	159993	NA
	204-103-20-1206.15	20.103	204	864429	606252	598324	707557	383931	678340	1.2898e+06	643252	NA	755067	355771	496218	679622	391223	265671	333257	396018	293567	332590	450579	626281	586078	662327	774671	1.13427e+06	817584	613429	613693	575048	505368	NA	NA	NA	NA	NA	NA	NA	NA	NA	NA
	267-161-19-1206.75	20.112	267	29374.5	43952.4	NA	NA	16464.5	27348.6	33751.5	19854.1	26365.4	43488.7	NA	NA	NA	NA	NA	NA	NA	NA	NA	NA	NA	NA	NA	NA	NA	NA	NA	NA	NA	NA	NA	NA	NA	NA	NA	NA	NA	NA	NA	NA
	117-75-64-1207.53	20.125	425	38355.9	349000	29301.3	37552.2	33342.2	32056.4	32141.4	21421	NA	376520	26083.1	28453.2	30882.9	57523.2	32385.6	30084.4	20770.1	34361.2	31907.2	31358.5	NA	NA	NA	NA	NA	NA	NA	NA	NA	NA	17856.5	NA	NA	16238.8	NA	12608.3	27594.4	11187.6	22869.2	NA
Unknown Dissacharide 6	361-179-54-1211.65	20.194	361	1.22729e+06	5.06097e+06	1.11068e+06	829838	403386	1.14489e+06	540083	625402	890799	3.66558e+06	650372	635292	1.15375e+06	893178	330714	621692	1.17813e+06	659599	604545	1.54492e+06	460908	678203	536286	737006	930264	974638	551742	777126	450167	865483	975937	399989	341914	371027	513613	232420	330799	279901	357797	504401
	204-199-3-1213.59	20.226	204	NA	NA	NA	NA	NA	NA	NA	NA	NA	NA	NA	NA	NA	NA	NA	NA	NA	NA	NA	NA	NA	280374	323551	NA	NA	299907	287622	NA	264298	448021	NA	205037	274176	NA	213518	160977	133805	201931	341622	188523
Unknown Dissacharide 7	361-217-82-1215.68	20.261	332	35582.3	48969.8	26280.9	31862.2	21740.7	32751.7	39644.6	NA	29564.3	41878.9	23856.7	27970.6	54066.9	24239.4	23091.6	26805	NA	24348.2	27618.3	36549.8	19869.2	29365.9	30842.9	23453.2	34449.3	33999.2	36615.2	33987	30287.6	28766.5	38761.6	31255	26161.5	19814.8	33183.2	24851.9	27789.2	31489.6	32548.8	27615.4
	204-191-1-1217.01	20.284	204	842760	247900	539838	740216	337570	628430	1.09036e+06	657211	563211	NA	NA	NA	NA	NA	NA	NA	NA	NA	NA	NA	444993	500768	599614	NA	874922	600256	NA	799133	491492	784250	NA	NA	NA	NA	NA	NA	NA	NA	NA	NA
	361-217-22-1218.44	20.307	362	42038.5	NA	34223.8	25662.7	NA	NA	49697.8	27258.7	19454.4	NA	37911.1	NA	NA	24258.7	NA	26595.2	102862	NA	NA	43698.9	NA	NA	NA	NA	NA	NA	NA	NA	NA	NA	NA	NA	NA	NA	NA	NA	NA	NA	NA	NA
	217-191-34-1223.65	20.394	479	NA	NA	NA	NA	NA	NA	NA	NA	NA	NA	NA	14567	70110	NA	11541.3	21738.3	9729.14	12417.4	37549	32394.3	NA	NA	NA	NA	NA	NA	NA	NA	NA	NA	NA	NA	NA	9734.86	17030.9	8800	14431.2	NA	NA	15046.1
	204-103-10-1224.51	20.408	204	1.01455e+06	149038	514824	714853	187003	736403	1.26895e+06	692701	608955	435275	247093	419667	NA	217361	66327	232985	567477	149975	NA	640497	548522	534357	370307	195975	1.06588e+06	618082	264826	880275	245483	978441	846891	209634	430611	178021	481373	130622	139399	197471	421493	303212
	361-339-18-1225.47	20.424	361	210420	119262	NA	NA	27767	NA	NA	129371	86179.7	86853	NA	NA	NA	NA	NA	NA	NA	NA	NA	NA	72954.5	87261	90755.4	81544	132903	NA	76944.7	118251	84645	125916	151160	NA	NA	61168.2	91197	36810.5	55694.7	75984.6	65158.8	NA
	339-324-37-1226.17	20.436	324	NA	NA	NA	NA	NA	NA	NA	NA	NA	NA	8120.81	4557.14	6853.48	4433.86	NA	4186	13023.9	4821.71	NA	4843.57	NA	NA	NA	NA	NA	NA	NA	NA	NA	NA	NA	NA	NA	NA	NA	NA	NA	NA	NA	NA
	204-117-12-1230.59	20.51	361	NA	NA	NA	NA	NA	NA	NA	NA	NA	NA	68684.5	90634.7	159189	62284	69076.1	75458	80018.9	99507.7	112779	NA	NA	NA	NA	NA	NA	NA	NA	NA	NA	NA	NA	59825.8	61726.7	NA	NA	51431.3	NA	52804.8	55379.2	NA
	361-281-81-1230.67	20.511	224	12051	22598.1	12567.2	15153.7	9066.19	13807.9	18402.8	7605.29	12343.4	19700.3	NA	NA	NA	NA	NA	NA	NA	NA	NA	NA	NA	NA	13809.3	11321	NA	NA	15234.3	10317.6	13108.8	13080.2	13258.2	NA	NA	8288.19	15496.9	NA	13665.1	NA	NA	13032.5
	217-191-81-1232.21	20.537	129	271134	170381	172025	161178	126083	204494	140371	170845	177379	199279	73236	91397.6	181884	98836	63682.8	76285.7	88623.6	87010.4	90706.2	157872	78786.3	133958	125063	92677.5	110111	130044	116217	121417	113823	109346	131642	75261.6	87779	65683.7	121727	81905.6	102042	102111	100514	97995.3
	174-86-14-1233.78	20.563	174	74170.4	76464.1	66160.4	84262.7	60505.1	43901.5	56839.9	35411.8	45625.7	124173	43187.3	72539.8	49183.9	65378.4	50448.2	57702	52307.9	76821.1	70594.5	62329	18233.2	44945.1	40217.9	31440.6	38445.4	21002.3	54195.8	30946.5	51962.1	NA	51920.7	31064.9	23133.6	31010	55694	27418.8	53366.4	25977.2	30883.8	22011.8
	204-191-15-1235.62	20.594	204	1.12342e+06	1.49778e+06	1.00755e+06	1.05225e+06	547080	967067	1.46897e+06	1.12068e+06	959279	1.40613e+06	433537	558166	683845	416755	185650	303958	665729	278258	254542	729816	523470	761343	757832	446854	998836	643483	633298	1.03434e+06	693876	894665	1.04968e+06	459326	294517	263831	596673	420973	488986	700473	629555	594490
	204-129-13-1240.83	20.68	204	1405677	2.04734e+06	1.07474e+06	1.1377e+06	759108	1.31792e+06	NA	819139	NA	1.15781e+06	NA	NA	NA	NA	NA	NA	NA	NA	NA	NA	NA	NA	NA	NA	NA	NA	NA	NA	NA	NA	571395	NA	NA	289333	561241	816862	643360	1.06e+06	749591	NA
	361-117-30-1240.85	20.681	361	NA	NA	NA	NA	NA	NA	NA	NA	NA	NA	NA	NA	NA	NA	NA	NA	NA	NA	NA	NA	118563	NA	NA	NA	180543	151443	NA	208769	NA	174155	NA	NA	NA	NA	NA	NA	NA	NA	NA	NA
	439-71-21-1241.52	20.692	439	33492.8	1.44201e+06	25080.1	32525	NA	30594	27671.9	11863.4	27994	1.49753e+06	25439.4	NA	25576.4	26358.2	28685.3	NA	20985.5	28282.9	28953.3	33278.2	NA	14408.8	22840.3	NA	19364	NA	12527.5	13697.4	NA	10171.2	14178.9	12941.6	9606.38	NA	18921.2	11034.1	NA	NA	17326.3	14491.4
	204-191-15-1246.46	20.774	204	1.10879e+07	1.53906e+07	7.18173e+06	1.06619e+07	5482702	7.97262e+06	1.43896e+07	9.08687e+06	8.09342e+06	1.1407e+07	NA	298676	NA	173145	153189	138129	863195	185906	NA	1.16387e+06	902625	NA	NA	1.04365e+06	1.41999e+06	982994	NA	1.12199e+06	NA	1.14732e+06	1.05067e+07	6.02582e+06	4975333	4.29128e+06	6.50618e+06	3.12123e+06	4.27858e+06	5.21679e+06	7.24974e+06	3.86337e+06
Galactinol 2	204-191-18-1250.74	20.846	204	2.75258e+06	5.47131e+06	2.35378e+06	2.31052e+06	1.28176e+06	2.4587e+06	NA	1.96048e+06	2.12381e+06	4.18171e+06	1.19744e+07	1.26294e+07	2.09056e+07	1.16086e+07	9.68323e+06	1.05191e+07	1.50362e+07	1.25721e+07	1.25542e+07	1.36508e+07	7.1597e+06	1.0229e+07	9.17192e+06	6.44312e+06	1.21063e+07	1.23782e+07	6.95777e+06	1.09406e+07	8.85524e+06	1.3122e+07	1.81342e+06	NA	998615	827635	1.3532e+06	761967	968325	996940	1.45089e+06	1.03793e+06
	71-70-2-1261.71	21.028	327	6894.38	NA	NA	11676.6	5696.76	NA	20074.9	4805.48	6966.81	15161.9	NA	NA	20125.1	NA	7065.95	NA	14294.9	9631.9	9262.05	14359	4420.95	NA	6665.67	NA	7023.33	8397.86	NA	NA	5174.52	6283.33	NA	7776.67	8276.05	NA	7380.24	4124.71	NA	5253.1	NA	4564.86
Unknown Dissacharide 8	361-217-33-1264.09	21.068	103	241706	165180	107311	138570	88997.8	262840	197375	231025	148270	193886	241983	192291	312421	204955	130006	173730	240363	194992	213323	187072	162044	201415	207125	151492	185270	210083	220765	254785	179703	230781	384852	153834	141034	172705	201764	134594	140782	156745	224993	162475
Unknown Dissacharide 9	361-217-39-1270.96	21.183	361	171790	241149	176381	192864	94305.6	179344	352258	211445	209660	293040	389970	239197	542211	306946	133339	252120	481054	253344	230997	344775	210422	242043	293661	217404	260329	294149	304852	367389	239117	303256	710257	266357	214722	214088	328480	214560	191403	278358	311118	220880
	354-339-15-1272.12	21.202	354	30568.5	95815.3	5307.67	7365.19	4122.86	11609.7	33218.6	52584.4	17149.7	128681	NA	12471.9	10474.9	11469.2	20306.6	3716.14	25984	10894.7	NA	31627.1	NA	NA	NA	NA	NA	NA	NA	NA	NA	NA	26697.2	8638.14	24370.3	NA	18389.5	11776.8	NA	18030	6425.86	11927.7
I-mannopyranose	204-91-36-1281.39	21.356	204	1.4599e+06	2419219	1.3186e+06	1.7206e+06	976478	1.58485e+06	2.10212e+06	1.01814e+06	1242455	2.30053e+06	1.64172e+06	1.70269e+06	2.80623e+06	1.89058e+06	1.67619e+06	1.87373e+06	2.07608e+06	1.78589e+06	1.8757e+06	2.1936e+06	1.22593e+06	1.75958e+06	1.86748e+06	1.68599e+06	2.03779e+06	2.16194e+06	1.94315e+06	1.48831e+06	1.71715e+06	1.87667e+06	2.44473e+06	1.84197e+06	1.73372e+06	1.39521e+06	2.08197e+06	1.55683e+06	1.71204e+06	1.50723e+06	2.24225e+06	1.34388e+06
Unknown Dissacharide 10	204-129-17-1286.26	21.438	129	1.41532e+06	2.16862e+06	994801	1.29245e+06	704822	1.1824e+06	1.61931e+06	775560	1.25888e+06	1.51611e+06	948393	979395	1.62445e+06	1114761	825731	1.06722e+06	1.26626e+06	1.0355e+06	969671	1.58067e+06	903348	1.03481e+06	1.06133e+06	1.09077e+06	1.33342e+06	1471330	1.1953e+06	1.23474e+06	1.01243e+06	1.24519e+06	1.35939e+06	1.1401e+06	989326	842616	1.08085e+06	934053	949153	1.07408e+06	1.3553e+06	1.07797e+06
	199-115-38-1296.28	21.605	199	10681.5	24730.5	10612.9	14514.2	NA	12846.8	21375.1	NA	12405.5	29283.9	11764.6	15190.2	29020.8	13659.7	30139	16423.8	16041.2	14893	19788.2	19323.7	11250.5	15803.9	15006.5	16545.9	20604.2	22844.2	21186.2	13827.8	20627	18369.2	NA	20738.4	23939.2	13332.8	27617.7	17162.9	17488.5	14952.5	24145.3	17718.3
Unknown Dissacharide 11	204-91-58-1297.59	21.627	361	64337.8	119515	53356.3	76198.1	44071.6	66965.3	116157	35197.8	94219.1	76776.7	43588.7	63937.3	117173	51890	68607.5	57439.1	66881.3	49440.9	63158.6	93113.2	57824.1	43244.5	57566.7	83335.9	84787.7	88765.8	56444.6	46643.1	52006.4	73026.9	45433.9	153659	78181.5	32856.6	58056.2	46380.1	49307.7	48041	52117	64696.1
	204-129-19-1305.41	21.757	204	NA	NA	NA	NA	NA	NA	NA	NA	NA	NA	NA	NA	NA	NA	NA	NA	NA	NA	NA	NA	24786	NA	NA	35480.5	45931.6	40703.6	NA	27531.6	NA	27794.5	NA	NA	NA	NA	NA	NA	NA	NA	NA	NA
	502-237-50-1309.99	21.833	236	14734.8	38130.9	10638.1	17386.2	12367.4	14263	12569.3	7232.95	9637.62	40611.9	10746.6	15827.7	22169.1	14104.5	21492.9	15401.3	10524.7	21113.6	30837.5	16414.1	3797.62	9689.43	10987.4	7356.86	12452.2	10483.9	10022.7	6815.95	12348.6	6523.19	11373.5	8296	7545.38	10147.7	14367.2	8638.05	12934.6	9060	12377	8609.24
	204-105-20-1312.17	21.869	204	101934	216839	93567	111424	71517.4	115938	188510	69823.5	150247	177524	90491.4	105054	189956	97943.9	89365.3	95804.7	152504	102566	112151	169892	103199	104121	105856	130583	148200	158154	107223	129784	96794.8	130171	118136	155598	120836	77652.6	110361	99111.6	102895	101452	115634	153678
	133-119-82-1314.87	21.914	133	41213.3	45755.9	37156.6	38377.4	38351	53885.8	46188	45415.8	36285.5	74586.2	36073.4	35731.3	50468.1	32724.8	34480.6	40211.8	38893.6	45608.9	51001.6	34868.5	18914.6	38867.8	39905.1	24117.3	34908.7	34909.4	35308.1	24999.1	43503.8	29761.6	70068.8	32498.9	22651.1	33420	49588.2	35699	52690.5	35136.2	34714.6	28580.7
	204-103-12-1319.59	21.993	204	29776.8	52391.8	25677	36491.6	NA	34141.3	66127.1	NA	57000.1	53189.5	NA	27747.3	51969.1	30877	28691	29463.1	58121.4	26966.4	28250.2	60836.4	42219.5	30957.6	27459	57850.8	57355.6	58002.7	34406	45876.9	27530.3	47161.4	30063.7	46668.3	41063.4	26138.2	30523.3	26007.9	28654.9	NA	31401	60385.2
	129-75-49-1321.55	22.026	129	14336.5	26544.6	NA	10847.1	10984.6	NA	13157.7	NA	NA	28202.2	NA	NA	NA	NA	NA	NA	NA	NA	NA	NA	NA	NA	NA	NA	NA	NA	NA	NA	NA	NA	NA	NA	NA	NA	NA	NA	NA	NA	NA	NA
	71-69-27-1325.73	22.096	71	494813	509688	429655	708308	507098	483869	243984	489842	342923	496631	747635	496909	441289	373759	427752	421343	242726	705921	685452	302355	276947	417669	635760	311791	328621	279176	591966	324219	477234	268364	415766	300140	326227	407883	499590	648042	542301	734111	351553	335696
	204-91-52-1330.87	22.181	204	NA	NA	NA	NA	NA	NA	NA	NA	NA	NA	NA	NA	NA	NA	NA	NA	NA	NA	NA	NA	24703.2	NA	NA	34720.4	28684.4	32487.5	NA	35383.4	NA	38609.4	NA	NA	NA	NA	NA	NA	NA	NA	NA	NA
	361-232-90-1332.28	22.205	232	7282.14	17237.3	NA	NA	NA	5773.1	4487.33	NA	NA	14815	NA	NA	NA	NA	NA	NA	NA	NA	NA	NA	NA	NA	NA	NA	NA	NA	NA	NA	NA	NA	NA	NA	NA	NA	NA	NA	NA	NA	NA	NA
	69-67-23-1335.83	22.264	129	18767.4	49171	11463.1	16354.9	8854.14	15482.7	11938.9	12981.2	15587.3	53137.8	9468.86	10148.2	14113.5	12510.6	9766.33	9205.95	15231.9	15054.6	13099.2	14866.6	NA	10773.9	NA	NA	13069.4	NA	8819.52	10952.5	10186	NA	9157.9	11758.5	NA	NA	12595.3	8448.67	13428.6	10990	8346.43	NA
	174-86-14-1339.93	22.332	174	119557	75601	44437.7	71080.9	44688.7	92249.5	47900.3	64421.4	35383	252491	39963.5	79121	122192	61055.1	27489.1	55792	44434.3	65404.3	75662.2	55070.7	NA	37500.2	36638.4	23636.8	30883.3	17327.3	66615.3	26742.7	48740.8	NA	108076	19949	NA	22229.3	54568.4	NA	47885.8	NA	24113.6	14484.5
	129-75-49-1360.06	22.668	129	109390	251656	75309.9	87008.8	68743	99534.7	71323.8	75704.3	57931.1	293167	64131.4	77192.8	76908.8	65449.5	80108.9	68705.2	55530.8	80466.2	102882	66750.6	29568.6	55117.4	49790.2	45411.4	56270.8	40915.7	44112.8	44989	61449.9	35744.1	72892.4	52793	42343.1	52858.1	81094.5	49122.8	75176.7	48208.2	67331.9	45349.4
Raffinose	361-217-59-1377.42	22.957	217	470890	1.16388e+06	462360	505571	300466	460436	848881	432875	649784	895880	465717	446708	709930	407289	318833	383617	671362	457335	369935	591706	424453	556238	487795	423675	619840	560888	478968	764852	455753	414163	341526	412654	261754	252925	296459	282147	276826	395711	457524	373708
beta-Sitosterol trimethylsilyl ether	129-75-48-1393.69	23.228	129	197736	476350	133105	149779	124257	173880	132390	123511	104150	562755	109658	127288	122819	113488	137223	115468	90344.2	137188	177708	110276	41138.4	89103.7	81219.3	69754.5	92632.2	62777.8	72841.9	72912.8	103732	57674	119618	74943.3	62251.8	81193	127596	80832.3	122770	73347.1	107789	70745.9
	69-67-24-1428.66	23.811	69	20027.8	27255	NA	11690.9	NA	16889.3	NA	NA	NA	36639.3	NA	NA	NA	NA	NA	NA	NA	NA	NA	NA	NA	NA	NA	NA	NA	NA	NA	NA	NA	NA	22863.7	NA	NA	NA	13260.9	NA	14258.6	NA	13682.2	8162.86
	204-103-23-1441.40	24.023	361	19528.4	163386	16740.2	NA	12846.6	17114.8	10102.7	NA	32558	37942.6	NA	NA	NA	NA	NA	NA	NA	NA	NA	NA	NA	NA	NA	NA	NA	NA	NA	NA	NA	NA	44349.7	75468.9	NA	NA	33286	123740	62904.5	405598	NA	288698
	204-103-25-1458.43	24.307	361	79176.3	507471	126269	83006.9	85112.6	103227	99445	49828.7	161010	104599	39733.9	39278	40059	33702.6	13739.2	22587	38683.7	18172	25964.8	66838.4	57450.7	128874	108956	54761	102946	68967.6	224078	254662	130964	145812	172030	507550	18273.2	41865.5	138578	622497	390988	1.0034e+06	66359.8	1.10274e+06
	204-103-16-1463.26	24.388	204	NA	105488	34608.4	22848.6	NA	NA	31931.4	NA	149043	NA	NA	NA	NA	NA	NA	NA	NA	NA	NA	NA	57994.8	51998	35570.2	48191.5	50494.7	32789.5	55252.1	106625	26900.3	57154.8	35352.6	143058	25816.1	20437.5	35627.4	161650	NA	259864	30907.4	397732
	204-103-24-1484.53	24.742	361	NA	38141.2	11888.2	NA	9894.43	NA	11086.2	NA	19068.8	NA	NA	NA	NA	NA	NA	NA	NA	NA	NA	NA	NA	14351.2	11421.5	NA	12034	NA	21058.3	25302.9	13634.7	15299.4	17771.1	47462	NA	NA	16051.6	54701.8	36488.6	83856.1	9018.67	95824.2

## Sheet: LC-MS pos
Compound	1_1	1_10	1_2	1_3	1_5	1_6	1_7	1_9	2_1	2_10	2_2	2_3	2_4	2_5	2_6	2_7	2_8	2_9	3_1	3_10	3_2	3_3	3_4	3_5	3_6	3_7	3_8	3_9	4_10_2	4_2	4_3	4_4	4_5	4_6	4_6_2	4_7	4_9	CompositeSpectrum	Retention Time
155.0065@0.6090833	73833	63422	69133	73664	61019	1	91108	84937	81681	79214	92435	105255	109281	104040	110604	123389	95082	99210	81652	86779	101157	98746	97525	84246	100746	74706	79335	86977	81795	111918	134241	112519	96979	109732	93667	93595	95818	(156.01367, 23929.752)(157.0152, 4566.3906)(158.0079, 3067.751)	0.609083
113.9803@0.6094516	1	1	58566	1	1	61844	74052	1	77612	71125	82784	87339	99822	83611	87509	97883	57345	85942	77201	73807	89136	84597	80027	81521	89771	69336	1	70371	92830	102868	119639	103120	85776	95384	48951	77868	83647	(114.98752, 22096.756)(115.98787, 4340.881)(116.983665, 1937.0859)	0.609452
148.9452@0.6106207	1	1	1	1	1	1	1	1	4496167	4029897	3613242	4068080	5158032	5417120	5168399	3228497	4811588	4302093	7725929	9824974	7489171	7731826	9716936	8445775	8619313	8710931	8956863	9132745	10524688	11109006	8248692	10727276	11240640	11273803	10822432	11046856	8969482	(149.95248, 1186265.4)(150.95528, 37070.336)(151.94948, 693367.4)(152.95078, 127154.65)	0.610621
104.9557@0.61096	1	1	1	1	1	1	1	1	719458	633354	1	615817	1	799982	785953	1	706390	1	1098560	1379772	1077152	1107074	1349737	1228215	1192858	1266563	1229771	1242854	1511840	1615609	1189473	1525553	1563215	1574443	1491557	1591292	1453894	(105.963, 191762.88)(106.96539, 5179.439)(107.959785, 111261.97)	0.61096
129.9513@0.6116428	1	1	1	1	1	1	1	1	1	1	1	1	1	1	1	1	1	1	1	436841	1	346698	1	424147	1	418166	1	394193	485366	511676	385984	487173	500616	499622	483322	497622	460718	(130.95851, 77000.586)(131.96622, 3399.3303)(132.95479, 40464.707)	0.611643
109.0018@0.6103514	5394622	5051554	4388066	5087818	4369043	5349108	6011034	5540347	6023820	5925690	6232075	6700456	7247127	6718105	6959674	7041522	7142967	6395537	5533643	5778994	6170719	5866842	5989666	5811659	6491621	5974974	5884449	5708956	6455503	7113998	7880959	6448572	6196071	6914842	6347670	6222331	6291987	(110.00887, 1438256.5)(111.01018, 212684.45)	0.610351
189.9717@0.61106896	1	1	1	1	1	1	1	1	689624	659102	602779	699692	825201	992638	934680	561132	844291	976548	1254723	2047715	1214623	1037300	1649337	1284139	1500688	1296263	1589283	1584816	1699266	1405251	1325647	1776228	1899619	1981146	1887450	1825660	1683262	(190.97902, 194302.53)(191.98085, 12295.856)(192.97581, 108824.94)(193.97696, 25118.258)(194.9747, 64852.965)(195.97845, 5359.935)	0.611069
110.9997@0.6106485	633498	590966	515658	591030	519276	638928	711636	661688	705904	693151	730692	815348	866926	806561	834711	850996	853469	756488	646991	685719	730481	689383	709959	678227	787723	693389	686261	676013	763954	844816	944758	769322	738051	825150	749672	730056	737697	(112.00681, 192478.34)(113.00995, 7874.383)	0.610649
193.9673@0.6115	1	1	1	1	1	1	1	1	167277	147232	143942	169318	206108	224104	207104	1	196271	1	288567	1	274071	285048	379393	292763	341777	294458	362038	362264	394860	275925	297723	407902	431946	459107	437512	431587	396705	(194.97461, 73448.82)(195.9774, 5534.3896)(196.97583, 3720.6921)	0.6115
150.0282@0.61105406	2728460	2551442	1815949	2462680	1886001	2675584	3089120	2749234	2815465	2771717	3086885	3557921	3699375	3535157	3533911	3701157	3865522	3391568	2624301	2814812	2957708	2762350	3032265	2282184	3400507	2686360	3032228	2937569	3205939	3575610	4037019	3271536	3141320	3584885	3323602	3011690	3099606	(151.03508, 694590.25)(152.03624, 119826.26)(153.03299, 90275.12)(154.03134, 8629.043)	0.611054
83.9526@0.6123078	1	1	1667173	1	1	1	1	1	1486609	1501044	1533491	1552642	1243509	1360444	1284850	1	1470682	1301193	1213549	1018752	1246894	1148761	893668	1180748	1135199	1150593	1147763	1082854	896407	1	941938	1	832835	990012	1177177	833375	1	(84.9601, 331563.38)(85.962776, 4411.74)	0.612308
152.941@0.6106786	1	1	1	1	1	1	1	1	1049926	924006	856736	952983	1	1251443	1208629	802413	1099382	1007810	1666269	2132600	1630465	1673422	2072209	1811788	1860796	1867817	1953840	1960619	2336747	2471642	1785623	2380138	2573711	2621802	2338037	2574436	1549040	(153.94847, 434014.28)(154.94922, 16955.604)(155.94905, 14111.142)	0.610679
107.9523@0.6132	1	1	1	1	1	1	1	1	1	1	1	1	1	1	1	1	1	1	1	2976231	3544977	1	2581653	3229675	1	3211777	1	3328108	2502598	2568059	2620339	2079443	2364149	2957987	3520667	2274713	2525344	(108.95976, 23076.523)(125.98606, 762334.4)(126.9888, 23438.363)(127.994675, 6841.0874)	0.6132
343.8961@0.613619	1	1	1	114207	145793	1	1	1	1	1	1	1	1	1	1	1	1	1	394451	645540	370865	380483	578557	418329	487094	450616	511124	520424	610358	712749	403977	673679	711538	732662	709464	711072	622471	(344.9006, 42683.496)(345.8997, 4844.8477)(346.9007, 48221.89)(347.9003, 12446.146)(348.8984, 46599.363)(349.9015, 10313.974)(350.8935, 21252.9)	0.613619
302.87@0.6135185	1	1	1	1	1	1	1	1	723090	551782	473509	1	845554	939881	849900	1	729167	631574	1834988	2773223	1537078	1863913	2683643	2179325	2140999	2259187	2304346	2371619	3144366	3403282	2043299	3195107	3355165	3388154	3190842	3390495	2926596	(303.87747, 148551.1)(304.8807, 9092.877)(305.87448, 168574.19)(306.87555, 32170.998)(307.87277, 161898.92)(308.8771, 29323.59)(309.87085, 83576.266)	0.613518
166.0049@0.6118056	568312	639265	526466	718613	756985	630354	590150	587062	424816	434066	465033	528311	385114	464649	412784	554059	529155	445875	376019	327216	377588	345054	289052	325186	382631	309715	404285	373242	264207	1	287588	239507	269357	329316	402115	254126	269923	(167.01242, 116737.86)(168.01263, 8541.457)(169.0152, 3410.83)	0.611806
297.8745@0.61315787	1	1	1	1	1	1	1	1	67271	1	131567	1	128278	1	1	1	1	138949	158640	68754	238932	114043	77777	160123	101998	269414	1	204569	1	1	1	240603	311808	339923	101497	246237	284928	(298.88177, 25738.951)(299.8817, 4289.5215)(300.87943, 14661.865)(301.88043, 4128.929)(302.87772, 11449.156)	0.613158
262.9261@0.6133334	1	69408	30814	1	1	1	97694	109442	2553225	2422338	2399352	2836686	3256172	3466239	3395674	2610354	3267054	2828947	3210783	3728667	3305290	3386959	3597860	3528186	4023340	3603736	3661191	3521019	4277382	4791550	4831260	4254363	4087912	4589852	4193156	4043461	3790082	(564.8184, 3450.52)(263.93347, 336130.78)(264.93436, 59707.527)(265.9306, 245224.3)(266.9312, 69300.62)(267.92908, 174165.95)(268.93063, 31019.602)(269.9278, 25593.182)(270.93042, 3405.748)(285.9133, 4627.198)	0.613333
307.9466@0.6136154	1	1	1	1	1	1	1	1	86774	74497	70295	97201	114123	117316	111933	90622	110763	97643	106413	130058	113066	108202	1	104640	137527	1	129144	121690	1	159847	157917	138586	136132	159404	135300	133541	124407	(308.95416, 24837.305)(309.95135, 7020.995)(310.9502, 4724.757)	0.613615
261.8433@0.6138333	1	1	1	1	1	1	1	1	1	1	1	1	1	1	1	1	1	1	71965	121042	1	71955	111600	87654	78965	98743	88872	96737	144228	200424	70498	144693	151317	204263	134969	230775	133269	(541.7217, 6075.369)(542.72675, 2899.78)(543.72076, 7702.97)(544.7197, 3228.99)(262.8505, 24043.238)	0.613833
311.9141@0.6166087	93719	127247	43094	120609	106397	111229	148397	157977	70664	77253	87210	96088	83017	80606	78419	125050	90651	76117	1	1	40830	1	1	1	36941	1	1	1	1	1	53060	1	1	32037	1	26929	1	(312.91544, 15986.35)(313.91516, 5318.3315)(314.91782, 6002.018)	0.616609
418.8472@0.61588883	1	1	1	1	1	1	1	1	1	1	1	1	1	1	1	1	1	1	66178	98001	63447	65894	94313	79600	86518	87539	82343	80309	171834	135259	1	125124	168214	123365	103697	121110	151096	(419.8544, 11749.634)(420.8451, 4357.4507)(421.8524, 11998.506)(422.85568, 5302.7866)(423.85245, 7534.697)(441.83423, 2604.38)	0.615889
349.8847@0.61594737	1	1	1	1	1	1	1	1	1	1	1	1	27321	56756	1	1	1	1	76817	1	67776	81237	1	95123	92620	83045	94489	93081	122749	92898	89135	119454	125517	132441	121918	128024	111186	(738.73834, 2912.3252)(722.7621, 2950.38)(350.8922, 19561.059)(351.89792, 5991.0977)	0.615947
278.9036@0.6156129	1	43286	1	1	1	1	1	53820	970458	914575	873883	971189	862237	1038088	913381	955552	1041011	870178	1056919	1029599	1026983	992899	897221	995643	1041754	995463	1148236	1066382	876838	927324	818624	777765	851814	1041065	1241051	853826	840911	(575.8396, 2775.885)(279.91077, 144993.62)(280.91306, 9397.725)(281.9079, 87577.57)(282.91238, 17873.738)(296.93738, 3705.6501)	0.615613
463.8039@0.6183077	1	1	1	1	1	1	1	1	1	1	1	1	1	1	1	1	1	1	1	1	26924	24272	1	1	32076	1	23447	1	74656	123286	44728	73793	75250	84738	30678	72226	65655	(464.81125, 7792.1934)(465.81406, 3563.8342)(466.82065, 9284.953)(467.8216, 3486.59)(468.8247, 6932.71)(502.7677, 3378.79)	0.618308
303.9522@0.61390007	1	1	1	1	1	1	1	1	249856	229759	227279	280250	328509	337533	326913	251936	321930	279448	296835	326043	328324	332242	1	1	396813	1	372683	344839	1	1	452218	1	1	413262	377805	1	1	(304.9593, 47676.32)(305.95502, 13444.15)(306.95624, 35213.52)	0.6139
222.9814@0.61451346	608346	786093	310123	693509	568818	660143	959831	999305	552922	562843	628915	740223	721984	643012	671466	865701	738989	638969	328326	283311	410586	365824	308012	332604	427216	323031	324092	297811	318734	381332	648777	312814	271976	345809	311959	270504	305788	(223.98872, 85521.3)(224.9898, 27050.117)(225.98712, 27206.84)(226.98798, 5507.465)(227.98605, 3638.4224)	0.614513
197.9326@0.61702704	551872	779483	375461	778592	781824	677276	802005	898682	422623	449483	474082	489665	382997	412019	376893	642856	455939	397243	253871	183524	276874	241821	170229	237854	250942	226815	219769	195261	170996	184605	255504	140931	142882	159666	213544	137784	162522	(396.8772, 3980.8)(198.93962, 81488.016)(199.94104, 13196.537)(200.93828, 13159.252)	0.617027
353.8538@0.6167	1	1	1	1	1	1	1	1	75931	69594	67389	73354	74124	81814	75391	80348	80426	68796	62383	1	67098	68493	1	68513	73240	1	67523	58798	1	67273	73557	1	1	64351	1	1	1	(354.85965, 11413.341)(355.8601, 3398.0625)(356.85883, 7574.284)	0.6167
238.9591@0.6178919	669790	979907	419551	977074	958456	815056	974686	1088275	424706	454632	507750	556781	400644	428844	404560	713362	518552	438143	253247	178640	270306	242196	162346	217267	261202	209712	235992	207411	158790	167181	255713	133236	133545	175991	211978	127084	149952	(239.96626, 87735.805)(240.96635, 16802.764)(241.96484, 14241.442)	0.617892
162.1363@0.6200937	177790	273830	131831	200269	244124	179058	206094	154557	289219	232811	212651	233560	1	222062	247391	228884	231461	219218	187528	182447	205821	167668	152100	184645	173974	156179	215773	196790	178614	1	205915	1	160499	161229	208796	1	1	(163.14366, 51242.953)(164.14664, 4755.117)	0.620094
130.1216@0.638147	528785	723352	394112	611024	615445	579511	704705	790995	352529	443885	450003	463269	480136	547724	441658	467354	411233	350140	249940	299917	362558	340996	420082	365232	324127	322177	368625	266995	233306	271312	513983	1	412518	229259	1	1	384309	(131.12878, 158903.25)(132.13109, 10741.452)	0.638147
359.8025@0.6586667	1	1	1	1	1	1	1	1	1	1	1	1	1	1	1	1	1	1	443165	486538	307922	406397	526953	324750	412864	332072	1	448117	522902	531869	424728	532463	548998	596094	541921	550205	507535	(360.80988, 113613.3)(361.81287, 4853.8657)(362.80725, 89655.41)(363.8085, 12428.496)(364.80554, 58812.17)(365.8082, 4576.7817)(366.8151, 12405.517)	0.658667
235.8972@0.6570556	50559	67478	50415	64287	1	76954	82464	83213	53177	56063	55975	55083	59918	54138	56669	62327	63330	56994	55929	50704	55333	58648	57448	49306	53891	49847	49508	49947	55471	57158	66385	57851	56268	60210	52968	53374	54992	(236.90411, 27767.258)(237.90573, 4470.361)(238.89714, 9011.733)	0.657056
319.8586@0.6594324	226834	240146	157981	242633	177166	268704	288456	304649	247344	240768	234726	244154	264672	244296	254722	274119	274360	228179	250788	211486	233222	237180	223700	218462	232750	209559	207784	198949	213252	227394	241700	208823	202278	239824	206898	194560	202775	(320.8656, 91205.08)(321.8668, 14906.865)(322.86325, 33731.668)(323.86548, 4291.251)(324.8618, 5685.0757)	0.659432
487.7793@0.66482353	86831	89538	64415	86336	1	97393	97352	104100	86919	89104	88781	86863	87140	84606	86913	94083	93982	85201	84921	74196	86478	1	82752	76158	82509	72111	76119	76100	74209	70399	78555	1	73378	79385	73785	69341	73567	(488.78647, 31767.592)(489.7879, 5806.9565)(490.78293, 17627.004)	0.664824
205.877@0.68021613	655619	694984	647597	734737	666993	714493	640569	686985	571725	571017	579938	541184	512832	535635	560904	529184	552397	577833	617944	549094	561299	586914	589228	530753	556196	516506	557100	602115	533975	484061	445921	525083	507165	554733	536522	516882	517365	(206.8843, 283146.72)(207.88725, 6548.123)	0.680216
1045.4703@0.67999995	66706	86050	70627	89026	93933	72935	66481	58056	23562	53310	21329	21876	1	1	1	46435	1	58917	20645	35759	32399	51598	1	17005	1	28474	1	46722	31520	1	1	41923	1	43487	17870	1	17017	(1046.4784, 11000.203)(1047.4855, 6989.0234)(1048.484, 14705.217)(1049.4943, 6123.646)(1050.4893, 6965.7725)(1051.4884, 2698.4)	0.68
961.5034@0.68074995	98046	112832	106319	125960	138692	112871	96879	88801	67691	82881	84207	62501	62675	53607	1	60417	65405	86659	59313	56198	67546	1	75801	62684	1	60472	74728	73278	49784	22794	1	46501	52624	62138	49200	1	46545	(962.5191, 17861.932)(963.5252, 9325.491)(964.5246, 20130.766)(965.53394, 7122.1606)(966.5301, 8535.538)	0.68075
457.7557@0.6809189	569253	619349	574934	657743	618280	620193	551418	599309	491920	457372	491508	449761	381011	405805	478985	421216	460272	480491	504841	448547	426858	486485	466172	420231	453622	388609	452297	498660	420150	333987	294671	399541	386069	422426	422297	386359	414625	(458.76376, 178716.64)(459.76672, 9330.62)(460.7622, 74416.04)(461.76538, 4407.571)(462.7602, 13760.287)	0.680919
541.718@0.6808378	903195	1008614	935275	1069134	1028519	993791	912191	978035	789621	750599	752840	715836	645567	700534	762679	675868	706281	752526	773776	688331	644190	765311	703787	626835	727014	643000	736841	774266	645726	547300	404233	589917	576165	637154	653308	583860	597088	(542.7237, 275119.03)(543.7259, 16687.832)(544.7221, 135740.77)(545.72485, 8791.253)(546.7196, 28146.459)	0.680838
289.837@0.6803514	2097040	2219660	2095575	2321908	2133586	2250561	2064739	2119775	1772873	1761059	1799895	1658604	1596029	1641850	1754356	1551826	1705818	1846491	1896420	1698552	1742137	1831749	1898847	1639321	1736952	1618794	1726716	1924590	1646143	1452407	1296819	1549516	1522225	1751458	1703316	1608076	1646603	(290.84424, 782315.8)(291.84735, 20485.594)(292.8427, 178954.23)(293.84583, 6110.073)(294.8408, 19093.182)	0.680351
877.5486@0.680743	137081	177884	150401	183706	192978	154050	140894	157747	99471	112968	116334	89554	67121	98263	90805	77595	94650	123102	111612	100702	79042	106910	102005	1	106752	82473	105829	108312	67136	51644	38134	83931	1	89177	76304	55531	83444	(878.5595, 28354.152)(879.5659, 11600.365)(880.5641, 27207.494)(881.5731, 7655.984)(882.5678, 10580.557)(883.5669, 3441.86)	0.680743
793.591@0.6810271	150078	180072	153050	181694	190328	165214	144984	163461	100626	110369	124892	89020	73003	85914	98323	92208	101937	114212	97067	84009	81274	113680	110194	82076	104944	77648	93487	122913	73407	61916	44422	67175	71105	83641	76236	66182	76727	(794.6, 34587.805)(795.60657, 9359.2705)(796.6049, 28055.682)(797.6135, 5886.467)(798.6032, 10813.353)	0.681027
625.6766@0.6801666	185151	222982	194223	242444	229655	208950	191039	218974	169550	157786	158139	156512	120764	132970	171541	103841	141973	165321	118534	107225	137388	152722	148252	126455	143794	123286	142791	164095	101009	116259	1	88290	88443	96048	99328	90281	124101	(626.68164, 68691.375)(627.6848, 5419.92)(628.68335, 41471.734)(629.6778, 4123.34)(630.6737, 13114.05)	0.680167
291.9247@0.6962582	153622	165240	147207	157390	1	179689	174853	1	1	191961	185050	1	1	180573	176500	192794	207523	162737	198075	188284	193836	186419	219772	192227	193550	179372	183298	192762	189865	1	211350	215587	217931	215336	192601	195531	193702	(292.9316, 132650.78)(293.9321, 8760.623)(294.93002, 27944.115)	0.696258
188.1134@0.7485626	209663	394073	149734	1	184146	190368	1	174060	1	144468	161202	188551	1	168440	171284	195173	200757	168304	96952	150365	138382	162552	1	125522	189220	133476	231262	133981	123529	132075	137584	114923	118380	376233	145437	366186	123371	(189.12729, 112276.06)(190.1298, 10077.117)	0.748563
380.0584@0.71432436	258485	304991	302366	251197	244730	241646	262097	200243	263466	283834	402541	378560	321273	277332	298867	270543	288157	303679	342463	285995	232054	248268	230447	244530	243311	208701	316304	313989	148743	161957	165729	148353	185139	192533	134202	136759	168271	(381.06564, 94592.586)(382.0681, 12648.315)(383.07327, 28551.719)(384.06577, 9378.83)	0.714324
174.0954@0.71532434	5726788	3893500	2519624	3748765	3547143	6237919	4186871	4794421	2448625	3871633	2777255	3875965	3192062	3045723	3740058	4933938	4369434	2726094	215782	3427196	4496138	3068762	2621290	3006071	4086013	2461303	4389908	2595571	2568293	2621059	3409109	3261214	2702702	3213662	2795424	3102997	390437	(349.2187, 17578.77)(175.10434, 2101871.0)(176.10506, 159716.38)(177.10628, 13777.389)(213.0685, 108437.68)(214.071, 9336.31)(215.0682, 9157.82)	0.715324
115.0112@0.72213507	3185275	4391231	3201163	3203507	4106149	2647352	3701900	3121488	4323746	3917824	4411211	6039680	4847904	6239557	5116531	4712502	5532239	5428702	2959986	4286244	3593529	3465529	3626628	3441095	4803933	3183220	4868829	4846550	3850413	4239095	5115754	4752018	4560330	3725984	4019952	3789463	3888846	(116.018974, 109444.58)(117.02239, 5330.217)(133.04495, 1937951.6)	0.722135
119.0423@0.7294595	603287	557847	508647	531169	702710	379553	538026	470693	525167	413042	535609	592605	546332	607488	561682	552387	545830	675165	404443	454312	404543	406453	494028	395394	440363	444328	512172	558501	404731	481129	552187	420644	552013	347865	406759	436711	441300	(120.049805, 218249.02)(121.050835, 9302.329)(102.0404, 55984.09)	0.72946
303.1262@0.7276	1	1	1	1	1	1	1	1	1	1	1	1	1	1	1	1	171649	1	1	207726	1	1	193616	144522	1	174397	1	196630	211638	224014	290830	260201	224710	218424	214565	201870	200559	(304.13348, 78319.1)(305.1254, 20889.283)(306.12692, 3382.5713)	0.7276
133.0252@0.72800004	1694935	1276524	1869602	1557825	2163505	922676	1333724	1175429	847454	936192	1107521	1099509	1	1076368	1	756597	762168	1190390	765646	965242	808752	885088	664382	801451	869385	812007	1189627	1092671	1022557	868139	740511	752628	842268	1050598	1070883	1009383	826321	(134.0324, 402986.0)(135.03954, 23054.242)(136.03476, 4042.4475)	0.728
101.0337@0.73556256	200227	188495	175748	184045	1	143371	172369	166188	155981	137274	170894	179545	165128	168819	164998	162107	1	188258	124267	150619	148581	143346	148034	144120	145501	150744	160033	111275	153077	1	148233	133796	1	114081	1	151883	140911	(102.04097, 57412.22)(103.04439, 5532.1)	0.735563
460.163@0.732838	49292	27014	46693	52607	31075	45491	31576	48097	52122	52169	54156	72601	73169	64901	74460	42289	68946	53572	41022	57742	49299	56302	55487	55547	72322	56125	63859	60240	57180	61884	55178	53971	48993	68303	68554	54157	59790	(461.17007, 14080.894)(462.17123, 5289.898)(463.1551, 10961.33)(464.1492, 3147.17)	0.732838
292.1214@0.7446388	221666	194144	196474	220574	230448	178527	203579	184658	146426	156509	1	210784	186587	176835	200196	160016	192092	234038	104569	173671	168565	181887	187855	163774	211410	148649	217739	188681	410803	181250	177532	175612	178743	183828	186864	185616	188491	(293.12723, 90612.91)(294.12958, 11260.484)(295.1063, 9571.93)	0.744639
83.0232@0.73497224	913556	883589	916334	986715	1051875	766206	784116	924662	775719	807081	734254	983312	909384	823014	877250	762043	840638	911501	459431	832708	766973	779032	610159	754459	900967	863469	917164	800928	753274	774082	793961	832252	818090	844191	1	807901	832992	(84.03082, 317561.06)(85.03196, 16761.547)(101.05625, 75657.24)	0.734972
480.1225@0.73817855	1	1	1	34178	41892	1	1	1	44155	1	38570	72958	58328	54407	40569	1	45772	49759	27132	42267	49586	30739	45004	1	41745	23900	51864	38571	35829	47125	45565	49086	48889	39846	57555	53327	52468	(481.12973, 17937.69)(482.13046, 3763.863)(503.1145, 5289.986)(504.11615, 3369.725)(505.1136, 4202.665)	0.738179
147.047@0.73894596	5708405	5115388	5537767	5900665	6195860	17304492	5265422	4975239	4233421	4306790	16625959	5287627	4578265	5162808	4988917	4200372	4329047	5396808	3830966	4938697	4267973	4363559	4183885	4155074	4508286	4280824	5010849	5045019	3132195	4001452	3811754	4040057	3744109	4515365	4559456	4140924	4311932	(295.1015, 10000.512)(317.08722, 3255.1875)(148.05478, 1859702.8)(149.06068, 159989.78)(150.05898, 14198.856)(130.04295, 5203141.0)(131.03735, 174623.34)(132.0419, 37656.52)	0.738946
265.1401@0.7487838	246405	128733	272839	173799	152579	214932	144227	138049	160416	182957	178967	209200	175913	137549	323812	132701	246654	196092	209407	284351	274964	269915	460456	185610	295129	216253	440858	371496	337046	463460	268262	210837	903907	547048	441483	385920	185444	(266.14758, 178613.83)(267.15057, 20063.234)(268.1516, 5963.3804)	0.748784
257.1002@0.7665313	1	506092	142930	60607	216364	465940	237809	611771	374293	379147	892442	1	1038579	1	733007	681533	916038	463480	670187	547727	57033	465184	669487	498924	345815	480676	482038	320914	431775	907847	536341	1	698037	844890	747146	1	351273	(515.2085, 3380.59)(258.10233, 329485.97)(259.10394, 30515.793)(260.10425, 6246.628)(296.0605, 16588.848)	0.766531
261.0915@0.76946867	208810	80527	1	79000	1	87067	101654	56859	112715	150248	155024	65570	132315	169551	138126	1	133799	1	79466	137604	42893	57901	130687	116026	87979	1	186054	81167	146470	76076	209592	188093	180534	61135	138539	67258	150095	(262.09973, 44565.23)(263.10397, 4575.7183)(300.05475, 6123.4077)	0.769469
562.2232@0.7822973	640394	391216	594535	478716	373858	425946	526561	593201	476415	677801	516778	481835	460717	375168	432644	442873	429609	480974	544001	573040	510039	463661	527593	763580	498690	819303	603692	486344	491826	382329	488382	499738	492837	503654	418822	521396	544391	(563.23047, 172647.95)(564.22644, 72648.11)(565.2287, 16275.134)(566.2286, 3924.7988)	0.782297
269.1948@0.77986485	150708	134306	117556	85323	121341	137266	131788	150166	198714	188735	133989	107882	97564	106760	179444	142058	115765	90073	178039	175034	197505	132495	151700	185655	128180	147494	138823	101089	232350	219405	192449	190340	190938	172949	164404	222022	199232	(270.20157, 103809.3)(271.20435, 11840.284)	0.779865
454.1091@0.7865946	297179	204333	284550	245702	151540	225140	247782	229934	219517	301344	270789	209575	219762	187714	197307	197437	220826	208129	348199	280559	237943	264509	292892	304776	244038	356586	283489	284444	259257	206051	218339	264242	274654	311555	238117	282730	249681	(455.11655, 83664.55)(456.11972, 13362.328)(457.1198, 8806.004)	0.786595
548.2067@0.78837043	1	55333	1	1	1	1	1	1	75293	99701	1	99002	81472	90657	73270	66608	90490	92728	83545	97334	71933	1	91080	98411	85771	102062	101630	100871	75034	66751	98552	105226	93918	89262	68245	1	86266	(549.21387, 22611.373)(550.2056, 13286.781)(551.20886, 3455.5928)	0.78837
69.0583@0.79427034	1090969	923659	941995	967864	965565	828258	1135610	938916	559475	622205	636031	440067	503050	395249	536910	673498	480629	529239	673538	731318	763212	624595	487994	626766	533445	784992	889014	697806	762209	723023	445232	440323	909566	937033	719133	1102725	548778	(70.06562, 259014.73)(71.06802, 11834.999)	0.79427
531.2177@0.7936217	885899	614667	807451	763130	548533	591961	843482	537312	334380	453775	588806	365919	416756	268765	408497	459924	408029	470678	576865	592674	601136	508176	394955	391956	462165	554281	842104	670673	494189	523683	302969	350487	674768	810216	505078	795320	416369	(532.225, 274230.5)(533.2274, 55784.93)	0.793622
115.0629@0.79518926	17887844	15430309	16093558	16747073	15811634	14948209	18249376	16074696	9994270	11390676	11529184	8576346	9342788	7559436	9674711	11768093	8812978	9989918	11746494	12779454	13334676	11135203	9019967	11161620	9826660	13494740	15730660	12359996	13504228	13041955	8393474	8153812	15714934	15571214	13177829	17736340	10216681	(231.1332, 15539.539)(116.070114, 3975051.2)(117.07361, 219460.55)(118.07544, 2670.915)	0.795189
378.1274@0.79629725	121920	83254	94879	88644	78539	71563	107804	75596	64423	70750	79406	58133	64136	57238	59430	66169	58704	67013	77853	84361	76562	68881	65264	63144	55189	74028	98244	86361	73008	78730	56495	57551	107866	95442	69945	120644	61173	(379.13464, 32968.188)(380.13803, 5557.0776)	0.796297
103.0996@0.78777146	10595719	9050993	1	9215984	8596756	9507707	8842314	8590800	9203976	8964165	9511997	8975950	8877924	8639582	10295280	8687824	9763786	9592731	9101506	10579815	11234340	9017326	10629366	9880651	10224460	1	10409183	10559022	10749676	11684246	10732388	10779857	11848586	12590972	10213422	10328069	10129716	(104.10634, 2338925.5)(105.10968, 126825.7)(106.111336, 5764.909)	0.787771
577.2224@0.7991351	98369	51835	61770	62674	29111	46438	51841	31760	41711	35547	62363	79529	67687	57366	45067	53860	64164	80986	38249	44408	54170	42625	77922	29433	45904	33041	57171	51363	22959	28263	48872	61782	50748	40178	23885	37792	38570	(578.22943, 23405.914)(579.22925, 6643.5728)	0.799135
489.1762@0.79874283	249684	1	260604	247028	194954	222004	223914	207767	132863	208488	163613	148982	144203	157215	148788	177478	134898	128141	198644	211182	213592	171595	156284	218384	149364	190385	207259	175874	182847	145574	1	142560	191382	218710	186082	161378	120311	(490.1836, 54046.86)(491.187, 10627.528)(492.18738, 3322.0845)	0.798743
457.1812@0.8004595	2750694	2324564	2584445	2664937	2240772	2488756	2959543	2834889	1246625	1547767	1373986	790941	978424	733986	1066837	1654120	895948	993472	1739942	1830372	2082466	1496459	926157	1464400	1055791	2085567	2220828	1577127	1903494	1646472	861509	773950	2117694	2219776	1735214	2344070	1104170	(458.188, 812419.8)(459.19092, 128847.42)	0.800459
144.0416@0.8087354	491543	333524	320071	476268	357896	416555	657905	359384	423288	443092	389651	430199	440048	337290	374751	353991	388736	382156	1	343168	429501	387864	459863	347049	368284	519316	305413	302021	292321	714988	406554	394619	34872	244803	1	1	342840	(289.09122, 21101.645)(290.09464, 3429.392)(73.02866, 2807.3633)(145.04857, 60060.777)(146.05328, 4759.3223)(127.0295, 20770.82)(162.0755, 76977.02)	0.808735
416.1537@0.80181825	34002	1	37161	31551	27027	1	29558	1	24813	29778	42768	42221	41257	35462	36030	26630	56695	48556	38833	41651	34060	54860	70070	24989	65178	33215	48127	55146	34546	32992	40858	41917	43558	43545	33787	1	54309	(417.16092, 10403.922)(418.1617, 2707.29)(434.187, 4424.1104)(439.14203, 7490.1357)	0.801818
503.1855@0.8061666	280008	164132	148209	198429	97835	172207	147181	145590	147473	1	116800	149709	148739	154533	104823	167181	129203	147978	90816	105974	155534	95086	154201	97136	88937	104681	111684	88322	77459	68713	122045	111753	122874	85722	59679	89322	85552	(504.19272, 54336.86)(505.19482, 11066.097)(506.1977, 3908.3877)	0.806167
126.031@0.8114054	466749	317075	324592	468976	298755	301375	479587	460326	394345	405913	293565	251967	411730	396059	415470	418804	239480	421573	495625	478665	297360	302595	306519	410723	251673	445722	289967	311881	281719	214317	412321	364849	235340	290941	245060	218908	415438	(253.07056, 3496.011)(127.03848, 96604.664)(128.04233, 6909.5576)(109.02791, 9048.422)(144.06497, 7055.2085)	0.811405
592.2078@0.80779314	46792	41460	1	46590	1	1	35269	1	29301	30402	57202	61634	52071	61518	47138	32703	66687	61287	1	39804	34772	39473	49667	1	48272	1	40106	51743	1	36373	52443	58281	38245	47065	31157	31722	41278	(593.2153, 19586.209)(594.21796, 4763.9365)	0.807793
369.1628@0.81415623	109073	77301	73458	67028	83778	53993	74399	66526	66625	59651	73812	1	1	1	52434	1	1	59272	81121	78312	63778	66535	101702	78608	56499	101159	86206	82470	98900	96941	134733	82708	156558	90701	119346	117212	89453	(370.17044, 32947.83)(371.17377, 5418.071)	0.814156
518.171@0.8131352	126650	122939	62287	137739	86553	113034	100397	98685	87993	80385	107889	120346	104656	137357	109011	93239	123141	105971	63244	96248	96568	87825	96692	57372	91764	70808	85416	96697	73079	88038	120587	100924	95540	95691	76190	75272	86396	(519.17834, 40478.58)(520.18225, 7910.0474)	0.813135
245.0529@0.8143889	662860	519454	528241	584155	565841	466098	558742	509387	683731	582354	762381	816410	728542	768770	650220	647829	595603	727575	760762	661682	509507	658862	832972	643394	660702	518536	723499	1	596060	615433	757219	651377	563686	697690	505544	503869	564770	(246.06047, 124626.164)(247.06396, 16645.686)(248.06712, 3351.5547)(228.04955, 28647.773)(229.05841, 3694.4631)	0.814389
533.2327@0.8222162	337281	206238	267841	304326	185051	226512	216075	132132	114498	128841	292822	225840	242568	160655	210201	153878	249414	290738	181578	249115	226605	215763	294574	128865	256579	160218	296627	321095	157903	239929	179397	230869	267312	345766	211423	250657	205054	(534.2396, 98488.0)(535.2424, 20605.406)(536.2431, 5702.1333)	0.822216
380.0725@0.8098918	649154	577774	493977	655025	537140	695393	620335	651392	459740	213061	469443	362699	412135	389967	413501	441359	400741	419226	622384	636605	638980	456813	555930	600309	214147	676312	617383	593906	488221	611374	493389	475532	729443	868178	714393	741115	502710	(381.0799, 112131.33)(382.08292, 14345.2295)(383.08008, 10873.874)	0.809892
475.1584@0.80946875	247266	158781	187448	212001	1	114755	186833	187086	108463	134977	128990	114518	99849	108539	96471	101970	1	121597	114350	152045	122089	90819	103361	137443	90800	153218	185305	147809	103517	111830	1	1	170559	204439	163396	1	114753	(476.16605, 31281.871)(477.16962, 6424.1777)(478.1677, 2743.13)	0.809469
371.1786@0.8281714	174224	115258	95678	113026	102116	94003	85777	1	83136	70556	140004	80277	87858	78433	89626	1	83525	115875	90694	109992	84275	97754	258678	79880	110161	102215	114729	146958	105162	163744	263181	170222	231574	160502	174212	137317	127819	(372.1859, 61189.715)(373.1891, 9618.181)(374.19135, 4406.815)	0.828171
459.1956@0.8281081	4484087	3394720	4205999	4435435	3524656	3486499	3327358	3138387	1878018	1820103	2730779	2124957	2337925	1808463	2160596	2210145	2332401	2450521	2202375	3352686	3240460	2711303	2835933	2356166	2636349	3021658	3531522	3395865	3400565	3854174	2380194	2114011	3912299	4755092	3589715	3825910	2317531	(460.20334, 1240126.1)(461.2065, 208842.27)(462.20688, 43989.86)(463.20908, 6357.448)	0.828108
465.2088@0.82824326	262541	241456	301312	294778	323080	252145	246952	207445	143592	155642	190352	212057	196151	190738	199232	156051	190965	215164	189176	284211	206482	245624	210925	179020	259582	214049	287577	302353	281126	288986	179395	193270	270446	380138	321215	282167	200535	(466.21658, 105842.02)(467.21964, 13817.065)(468.2206, 3958.4434)	0.828243
71.0739@0.8344721	1320276	1044343	1014442	1281356	938128	1288650	1007537	1082264	1130373	920965	1	924529	1007638	798370	1080145	728884	1102240	1041293	1007416	1053209	777354	919228	1132662	968885	897474	1179674	1105710	968524	881472	974353	964364	879447	1035177	1063221	867493	1032120	859661	(72.081116, 373207.12)(73.08401, 16776.268)	0.834472
117.0787@0.8355675	5599820	4554699	4331291	5395064	3971551	5378985	4433795	4581642	4891512	4289006	5202313	4230444	4490886	3797878	4658478	3532527	4961211	4746422	4412648	4566114	3438261	3993375	4926364	4246807	3957018	5070756	4871449	4281144	3905610	4289435	4332802	3871364	4604837	4611103	3952056	4449744	3782587	(118.085884, 1586581.8)(119.08885, 84639.805)(120.08919, 8074.4873)	0.835568
327.1523@0.84043235	160423	123835	132172	152266	91246	135043	131558	142735	137326	151741	170386	142889	144062	142993	124232	120927	160914	164863	155104	145633	111729	137105	176685	144444	133621	160782	127290	132325	116382	130128	180129	160747	160450	131257	109986	130495	133597	(328.15976, 63080.668)(329.163, 8586.734)	0.840432
621.2504@0.83970267	1473798	1431442	1260194	1229615	851320	1828448	1608902	1534537	1513801	1296891	1599625	1076992	1082857	858832	1188138	1624814	1289206	1090040	1396849	1040913	1441277	1254646	1269260	1474424	1110388	1500005	1279772	1049793	861155	831004	787588	829801	889948	770310	672589	862673	1014909	(622.25714, 514021.3)(623.2596, 112199.65)(624.2598, 27829.223)(625.26196, 5255.5874)	0.839703
627.2621@0.84043247	86214	103381	94485	80298	82195	98604	112005	99986	118635	120447	116619	115726	96855	96967	108913	112169	115030	102596	132710	94251	96461	115724	99341	122792	112071	115349	113642	97905	77354	68555	66163	76700	72206	71918	64809	70624	94882	(628.2693, 41670.523)(629.2722, 8315.81)(630.2748, 3304.66)	0.840432
202.1416@0.83786666	119873	102198	101756	98043	93045	107556	166100	132177	93551	127805	77231	112137	92796	110379	1	104020	92581	1	80403	64898	1	76684	81744	87706	83665	95970	94669	1	69497	65504	112881	1	96769	58405	1	1	67071	(203.14893, 40097.473)(204.15015, 4677.0933)	0.837867
144.0415@0.8727713	476133	464211	326157	407526	508481	678130	292617	282338	318582	276023	467252	268697	248609	290101	232980	218574	250096	252703	1	444154	515039	384959	285885	254861	378372	1	977881	554192	536094	493226	225969	229651	255543	793610	857741	673730	307899	(289.09116, 24272.033)(290.0946, 4570.116)(73.028786, 3017.238)(145.048, 72030.33)(146.05206, 6869.853)(127.03752, 55349.83)(128.04434, 6202.2754)(162.07162, 75954.06)	0.872771
162.053@0.83456755	3225479	3144441	4988588	608817	3786415	3783803	3244973	2716984	1266874	1871829	484688	503068	468440	583067	602516	1656668	433509	633679	2477225	3341644	3661380	2850500	414570	2461790	447490	2774567	4539011	3959209	4083231	4186547	1924683	446688	3791930	5939414	5249817	4044740	2184326	(325.1132, 297261.3)(326.11853, 41188.773)(327.1194, 9381.382)(163.05995, 97633.484)(164.06317, 7910.328)(165.0679, 3029.16)(145.0485, 111979.72)	0.834568
637.2125@0.8838055	104245	75547	88531	85261	69809	77251	102181	68832	50201	70920	81099	56489	61759	43284	70515	91060	63880	59618	56898	56426	66556	57540	59879	59937	62216	59523	79813	63885	45160	49487	45398	69796	1	56994	44198	54493	53544	(638.21405, 18157.059)(639.21765, 5173.587)(640.2029, 4242.6797)	0.883806
779.2806@0.8601081	218391	164147	133323	186256	135298	194006	201067	95203	62310	81008	136711	165274	156898	105162	138100	99587	135371	128063	64412	86758	94774	107359	181335	81041	190330	70273	149800	140072	59294	110689	74367	137201	108271	106865	89763	103021	108753	(780.28845, 52263.348)(781.2911, 16195.931)(782.2927, 5407.5576)	0.860108
275.1122@0.8634596	2348471	1632688	1704102	2061150	1751164	1960670	1852092	1349783	730258	942526	1091479	1317973	1286170	1029833	1117700	904087	1108588	1093823	726403	1083500	997743	1056045	1697190	1068351	1657821	1054382	1445927	1388437	1209927	1587234	1215216	1575561	1631710	1673298	1699744	1739950	1187315	(276.11917, 574050.25)(277.12073, 61235.48)(278.12137, 11606.531)(279.1185, 3504.66)	0.86346
254.0904@0.8824594	86724	124714	128474	99183	106826	91717	132181	178499	102634	141824	135312	140264	125060	140894	109130	122551	130064	107632	143136	119718	80163	134383	120121	123504	143385	362119	122910	116797	132652	135797	584514	135521	149026	166233	499892	372186	439193	(255.09747, 89292.086)(256.10168, 11513.75)	0.882459
231.0375@0.9008528	107482	78563	88878	95188	71893	1	101855	68198	1	108060	109135	101944	60820	84619	64808	63561	78795	90402	70077	103733	90314	100598	68883	91588	101310	90523	166110	114163	85550	91085	1	110257	107084	126515	105850	121842	83827	(232.04694, 6075.913)(249.07123, 41509.168)(250.07388, 4924.3975)	0.900853
129.0788@0.90056753	15879841	8502608	10571502	8084252	8547406	8305369	9649311	8682708	13067202	10805809	9419336	11656341	12255885	12374299	11650500	4961942	9522769	13517339	9093779	8927949	5041680	9251912	17448306	12672684	10616771	10623034	7083312	10664128	8655858	9838743	15626157	14086382	13499881	5693292	4484496	10319873	10935634	(259.16278, 11088.393)(130.0857, 3878945.8)(131.08989, 215193.44)(132.09135, 9108.335)	0.900568
88.0164@0.9088649	622183	748158	997142	680454	614761	783242	804095	915409	916532	893871	683421	896316	895479	1000063	936411	800984	939888	950707	1223313	908633	1078082	1172248	1098810	1172079	1174797	1127438	849396	1213464	967548	1229178	971094	1171662	1189527	1461768	1429448	1277514	1264207	(89.023636, 337887.25)(90.02692, 11686.974)(91.030464, 3229.165)(71.01321, 127946.62)(72.01652, 4684.036)	0.908865
321.9617@0.91186494	96583	107241	107891	121613	138079	105074	105716	112038	116983	112855	108041	118021	109580	117621	126529	106826	126027	111515	114124	120323	105296	124585	106309	123201	124174	105282	118989	121492	122807	104090	82172	118128	97425	123026	127105	104782	122196	(322.96884, 38879.82)(323.97156, 5557.8794)(324.97186, 4697.849)(339.9912, 2961.185)	0.911865
134.021@0.9105406	161307	175688	218839	204023	200947	174621	164423	205897	202127	179764	189567	192271	181902	91594	211300	183692	307685	324760	243641	273322	209175	259056	240709	234335	261629	245026	242953	274169	309598	235257	194688	103963	222315	314558	336908	132031	138708	(307.00656, 3924.272)(291.0332, 3690.35)(135.0287, 36823.316)(117.01807, 59041.844)(118.0219, 3640.5)(172.98337, 8142.5234)(152.0555, 7756.3706)(157.01012, 47390.684)	0.910541
298.1254@0.9162963	1	1	15950	23322	1	25687	32910	12557	34962	42420	57799	19856	33689	30372	32087	40315	34762	1	41256	1	1	1	29441	16597	1	16910	29281	23675	31674	15467	1	20390	31834	25775	28710	22620	1	(299.1316, 6607.993)(337.0893, 7005.8843)(316.15936, 6345.644)(321.1108, 7930.42)	0.916296
145.0373@0.92103565	159223	105529	1	158016	129070	153021	1	1	331635	239802	318853	288895	463229	346495	413767	177031	301511	189684	1	373055	341897	536390	1	625093	328039	364951	193120	208687	1	521847	289878	1	417072	464890	1	1	293889	(146.04424, 142767.36)(128.03377, 71295.31)(129.04205, 6139.27)	0.921036
427.2055@0.90947217	197693	86637	144294	91910	76912	108227	106056	89905	37174	152284	118685	147337	153007	128748	148815	94087	124199	140149	120801	109942	1	100724	239566	128401	108348	35881	92065	101794	241093	176542	108796	138830	443243	190851	203870	225205	103324	(428.21265, 51589.34)(429.21503, 10103.814)(430.21133, 4583.683)(450.18936, 5197.68)	0.909472
486.1579@0.8787932	57767	23028	179588	54321	60720	76366	26732	35680	1	33247	50282	1	1	1	1	1	1	42135	49471	88962	85235	64788	40720	40059	67634	38940	116724	97481	48237	73819	1	32828	305386	585300	68011	347146	26969	(973.3239, 24546.504)(974.3281, 15537.37)(975.3308, 6782.4575)(487.1653, 22458.252)(488.16907, 5508.2515)(489.17896, 4506.993)	0.878793
400.1458@0.9471892	132833	83735	61368	74414	89980	79210	153461	95406	72905	159760	68255	72243	167707	63782	56374	43144	58767	166544	80913	45322	33153	151811	38367	42274	139436	37295	48143	128043	35396	49666	70593	47450	41919	47722	54809	40865	50897	(401.15564, 22600.06)(402.16006, 5390.9165)(403.1787, 2925.83)(383.14075, 41084.08)(423.1464, 5944.7095)	0.947189
336.1282@0.9491351	111026	119753	74999	104836	84131	105507	94250	85563	196122	175710	192439	239555	203977	216540	217566	193041	189939	156007	167468	116334	118943	129610	117524	126622	118774	114656	112297	122237	56136	86698	94071	130361	72126	84584	81343	76195	81581	(337.13483, 56933.223)(338.13855, 11854.53)(339.13715, 3730.145)	0.949135
369.1959@0.9488648	182725	215299	158870	172205	123533	168384	202522	143368	187646	146729	291736	246344	230772	357519	166388	220253	261730	282838	191949	150623	153678	195395	245585	175551	224128	161308	115647	206544	131434	150016	449066	164334	206145	195224	188791	151964	215637	(370.20242, 117639.92)(371.2048, 19168.297)(372.1971, 4141.033)(408.1566, 3774.29)(392.1791, 6619.53)	0.948865
685.2399@0.9490525	18627	1	24585	1	1	1	1	1	1	1	1	1	1	1	1	16913	1	1	17930	35490	1	37011	57699	41823	35600	44382	58634	46598	51505	82945	1	1	78301	60805	58288	52602	26986	(686.2475, 17518.521)(687.2508, 5949.0347)(688.24207, 6532.173)(689.239, 6041.88)(690.2412, 2650.27)(708.22253, 3500.3699)	0.949052
324.1011@1.0140716	167935	103673	917913	1	159883	1	136896	1	1	233950	87358	150224	139162	1	133388	145900	1	1	348685	617327	425837	490558	105557	433917	1	709453	779668	592191	2029570	1439086	149709	397116	1	1989151	1902593	1432983	461220	(649.2162, 25274.012)(650.2211, 10359.08)(651.2328, 8378.93)(163.0577, 33707.918)(325.11002, 170903.58)(326.1126, 21472.738)(327.116, 7551.959)(328.1087, 3400.3)(342.1354, 3995.17)	1.01407
135.0504@0.9499706	337757	461693	415921	399766	309892	321795	1	286926	339167	448855	386810	436179	467123	508670	329353	1	426267	370543	459023	436064	286904	393154	486232	392134	399116	1	419672	453171	426348	579348	758528	517184	530024	340902	347853	505234	619838	(136.05736, 186086.28)(137.05824, 15608.713)(138.04987, 49576.58)(139.04778, 6099.4424)(158.04094, 4385.774)	0.949971
366.1387@0.949054	3049124	4265144	3374376	3235711	2723683	3556272	3629455	2564991	4124497	5057965	4770918	5300586	5508211	4934473	4910204	5869949	5691450	5495938	4551528	3544415	3153774	4136170	3181749	3522527	3961899	3482541	3954327	3615719	2645751	3653191	3453880	2947934	3374761	3419204	3598825	3100250	2967814	(367.14655, 1663784.6)(368.1498, 297752.12)(369.15085, 45957.617)	0.949054
635.2618@0.9482702	257855	223727	561371	198343	298841	411497	197397	216353	140235	112734	172893	86792	93348	72022	80640	91166	75337	88263	186653	354737	284000	331901	230363	285170	238218	400747	379262	367550	730468	843098	149870	196373	810364	981105	892817	668701	237317	(636.2691, 153530.3)(637.2708, 38454.285)(638.26764, 23606.11)(639.2602, 4708.112)	0.94827
85.0851@0.9498786	710576	662289	597118	553459	510501	609789	1	488537	608264	398655	715926	549228	615315	646813	527964	1	635097	701361	1	486622	512245	583426	847604	528017	685504	1	448972	579592	427678	656915	1214086	640352	737882	621863	596951	538672	628259	(86.09281, 319583.28)(87.09572, 17902.775)(124.0465, 4080.27)	0.949879
162.0524@0.91822845	695653	701952	308164	2579161	1123102	1196441	878707	873367	508761	121195	1555598	1285852	1261206	1046476	1071060	1	1265448	1263410	317578	233181	160853	207752	1463894	185953	1825325	403018	259097	417967	410303	378458	203052	1258115	2334283	450335	445358	378793	1	(325.11197, 167707.2)(326.11685, 22476.34)(327.11948, 5318.199)(342.1359, 3698.26)(163.05734, 75128.23)(164.06487, 11892.783)(165.05386, 8046.4614)(145.04558, 48142.79)	0.918228
131.0907@0.9498858	3959417	3833403	3363768	3163824	2927766	3680696	3013745	2874462	3442457	2392553	4073978	3218173	3530145	3767997	3021670	1	3626526	4115174	2845611	2899339	2968220	3330657	4863275	3088788	3935896	1	2696134	3501428	2592843	3718746	6318789	3829972	4226692	3628148	3538639	3157231	3797892	(132.09723, 1755476.6)(133.10004, 111897.875)(134.10007, 10010.532)	0.949886
238.0906@0.94978374	640173	522924	481853	650688	649399	578014	829257	371687	647200	617705	588142	1187781	1279740	514566	1224680	544730	1217279	464360	1296786	539171	918375	1077106	1007425	425583	439403	876908	376281	448859	792841	705407	1203237	1406989	531484	457717	1230492	405854	512067	(477.18768, 20002.502)(478.18326, 8905.318)(479.17856, 3522.3135)(515.1503, 5002.043)(239.09924, 214324.3)(240.102, 27072.033)(221.08592, 252586.64)(222.08919, 32188.166)(223.09512, 5421.0913)(256.12485, 109045.4)(257.12515, 14794.027)(258.118, 6809.22)	0.949784
181.0689@0.94995826	1	1	73109	85411	97447	89667	118951	72835	1	1	1	1	1	1	157014	1	1	1	119898	116701	81772	135743	208977	129303	173594	123893	159806	167965	107294	178700	1	173702	202560	125773	128208	133481	1	(182.0767, 59347.703)(183.07893, 7215.346)	0.949958
248.0589@0.949517	1	95457	1	1	79928	73052	84448	74145	80903	112477	1	98357	91561	130487	1	1	1	104135	1	125295	90014	105041	117925	123842	130871	99573	144165	121261	101608	134053	138154	133693	148171	108449	116773	132643	129744	(249.06732, 38990.613)(250.0749, 6463.2925)	0.949517
262.0772@0.9802975	220358	663922	819647	979784	818337	772338	790921	709176	122905	712460	542890	445647	647402	479763	494487	346424	417832	520656	583595	735063	549157	696571	728654	880141	774523	858132	814759	180456	734326	762044	529012	658308	797083	791388	812112	977261	850251	(132.04184, 57157.367)(263.08286, 239974.73)(264.08536, 27304.113)(265.0887, 11913.146)(285.07, 2918.43)	0.980298
522.1533@0.94962156	366783	217566	149622	249446	187889	257769	221347	383361	178815	111658	147313	129805	141212	77766	129958	176428	135254	207757	85043	88711	300344	112782	182012	113062	109334	126277	115003	140189	25663	30314	144012	72862	58139	35064	23550	50468	86066	(523.16077, 68701.4)(524.166, 14494.016)(525.1588, 10082.026)(526.1614, 3529.4133)	0.949622
750.2885@0.94906056	74243	46000	217591	74339	55222	74116	45459	45481	1	62737	62905	24628	19031	20547	31547	46909	1	1	116541	58702	63828	73417	36280	99340	51517	148532	138545	75772	416913	311653	1	99439	202865	470450	378314	160758	37756	(751.2959, 48142.64)(752.2983, 14773.391)(753.29596, 7935.918)(754.3002, 3304.94)	0.949061
246.1167@0.95121634	1737881	1054584	1929140	1729660	754715	1008448	1004941	874157	640588	1890454	1957713	1202449	969422	1378557	1811247	2355895	1366138	708107	2543323	693326	1085848	1018046	1095127	1575990	1120031	1757364	1449454	1007661	2707842	2205462	944738	2510333	1688903	2909987	2503394	1187313	775043	(124.065094, 9302.9)(247.12392, 678096.44)(248.1264, 67039.516)(249.12358, 11478.049)(250.1241, 3990.41)(269.107, 4507.8)	0.951216
223.115@0.9515406	127572	135334	130745	134200	124452	131681	146114	107380	116182	135513	161195	168698	151721	164069	142821	136641	163439	148403	137187	138142	115178	145487	143827	124152	160750	119537	143724	145787	109445	144498	197903	172583	146422	143697	143002	125115	156720	(224.12222, 19016.229)(241.14868, 47934.363)(242.14952, 7035.971)	0.951541
258.0816@0.91708696	59769	1	69164	60106	52806	61401	51747	43184	1	1	1	80600	1	71549	1	1	45245	1	53689	65741	42215	69000	1	74153	88874	57984	77916	59656	87300	1	1	88988	1	94239	85378	1	1	(259.09048, 35931.105)(260.1001, 6053.2383)	0.917087
311.1001@0.9529187	2260267	1315859	1375444	2074994	1568770	1683120	1432354	3080050	1138411	1053181	827171	957398	1069668	464458	1021197	1236900	892361	1128990	946101	1107222	2991366	920189	1004613	1097556	720289	1208655	1345053	1257041	759565	391559	504060	561539	657076	602852	460426	755262	617415	(640.2239, 6236.51)(312.10672, 383847.4)(313.1096, 46054.87)(314.1062, 22086.28)(315.1139, 4505.062)(294.09756, 60262.773)(295.10178, 11642.937)(296.1036, 12236.31)	0.952919
174.0725@0.9542162	818408	897117	581252	1302519	877366	748141	554955	772718	1393694	1403121	2055949	1773168	1834944	2122885	2142405	1452916	1566611	1483031	1313336	1000753	771847	1112768	1500606	1388266	989440	1029784	1211186	1125025	744017	1419752	1588165	2369406	1011532	1370371	1055224	820881	1599580	(175.08087, 665459.94)(176.08432, 67483.72)(177.07886, 8110.865)	0.954216
193.1057@0.9548379	51935	61004	59668	59592	69919	57719	52470	50573	55424	52644	55384	75031	64695	70210	60954	51189	67730	57965	56448	62501	46584	64872	56901	53056	67799	46660	63139	75026	60007	76159	67782	70861	62860	64845	69837	59278	68562	(409.1962, 4044.6)(194.11147, 25574.967)(195.11343, 6285.9106)(232.0668, 5285.24)	0.954838
622.2384@0.95494604	160629	146170	80252	148393	117760	132070	139298	132576	171689	97711	155489	117315	155669	123261	136058	158096	164562	159936	133187	124915	166405	130203	202669	121504	167552	125510	106943	143746	36124	66971	162369	129245	79066	58274	51939	61201	156368	(623.24506, 50306.79)(624.2455, 15498.503)(625.24316, 6256.7046)	0.954946
737.2636@0.9552501	36253	24965	26190	38278	18308	23006	28006	22453	20823	44051	47177	30738	26607	1	45970	65257	35222	18224	65368	21203	29012	27285	27628	32243	29697	33807	33188	27501	18212	25673	19342	47069	21577	27674	21232	17331	22715	(738.26984, 11496.951)(739.26544, 5216.7046)(740.2661, 3781.83)	0.95525
406.1529@0.9574412	1	72299	1	82252	1	64114	74830	74099	129758	128092	139414	169498	140742	109683	150997	95723	142012	112782	109945	97187	64866	89190	130951	102565	83316	110818	76465	90144	52617	52402	109111	85737	80184	83193	80618	87075	105812	(204.08339, 29369.713)(204.5854, 6503.494)	0.957441
995.3151@0.9547353	55675	44799	103749	72273	95197	79211	66929	67623	34501	40751	35262	19420	22340	1	20453	26671	18998	1	74053	147684	92000	100651	41360	83213	64225	115806	145899	118134	152535	166953	1	54125	126538	224104	192295	160568	78301	(996.32275, 24353.387)(997.3249, 10457.607)(998.3255, 5734.922)(999.3225, 2946.1)(978.31335, 4862.544)(979.318, 3401.73)	0.954735
392.2108@0.9632334	182581	140652	133673	147005	92123	121629	163138	133404	116301	100782	156977	139180	100761	1	89696	170333	136286	112530	89335	88392	97354	1	145022	1	1	136078	106889	97086	1	77074	271324	107608	143240	95001	90228	1	1	(393.21768, 78350.914)(394.21536, 15865.266)	0.963233
252.106@0.96537834	468367	410543	544229	319527	295404	361365	532840	202776	753605	587819	498751	686959	779288	1184112	838392	699368	768548	463785	647964	612014	456441	579260	839364	528691	726810	516449	596342	640895	701503	1051496	1073714	992745	1137393	834234	725611	785046	806576	(253.11198, 290441.5)(254.11685, 37564.957)(255.0961, 86055.05)	0.965378
329.0883@0.966081	995749	684095	747221	1250401	1195382	966476	1202181	1007522	1016703	912278	1060530	916829	1201045	834489	1014368	1049121	1135146	960253	1124462	1392045	739338	1309845	1090615	857619	1296081	987644	1341069	1404570	819426	1284851	881352	1215263	862701	1011610	1167771	1090583	1504981	(330.0958, 326239.2)(331.09842, 49041.92)(332.0968, 20354.297)(333.10193, 3682.449)	0.966081
491.1397@0.9676487	441721	426140	313949	522592	523373	413434	503077	450503	477357	431914	331313	433182	578637	388480	493317	518679	550358	438627	562936	652125	382883	594441	516077	400472	606115	426497	556423	647002	318255	506541	394362	558436	358573	430723	447435	425350	683418	(983.3002, 6038.338)(984.3005, 3944.71)(492.14932, 134330.66)(493.1527, 29174.31)(494.1517, 11279.13)(495.15842, 3113.7678)(530.10547, 3951.144)	0.967649
849.2561@0.9680435	33015	24618	72740	30334	28229	52737	26758	35462	23247	1	1	1	1	1	1	1	1	1	34535	62942	69974	31826	1	44814	1	66698	66845	40083	105297	46458	1	1	76650	124784	75225	69470	1	(850.26306, 16986.459)(851.266, 6392.097)(852.2657, 4267.44)	0.968043
261.1106@0.9684445	125274	96305	1	121125	1	84114	126733	76668	72117	90247	1	116967	97939	1	1	110451	1	1	1	80338	60654	78641	78247	1	87823	1	107963	82524	52459	84286	116487	97441	102114	67211	68570	62358	68678	(262.12146, 36515.656)(263.1038, 3272.1)(279.14703, 9447.201)	0.968445
916.1905@0.9781083	57661	57750	30048	66189	52481	53613	55988	49799	76393	61248	72854	68229	95899	63208	82032	84328	84442	73274	72496	74331	84100	75059	70450	51295	70903	45883	68596	74586	20521	49913	42971	73510	32848	34319	37337	42454	64303	(917.19763, 20036.695)(918.2018, 8111.7046)(919.2001, 5150.9043)(955.1534, 3239.17)	0.978108
921.0025@0.9931114	190405	184992	157339	36220	216041	182422	157949	173775	165258	146530	136274	181504	174985	135064	168858	185194	201240	164190	166226	160764	198378	135024	147998	146726	106731	1	218972	219938	121990	142366	107508	140887	128545	178441	188519	133029	179549	(922.0099, 33647.28)(923.01227, 5989.754)	0.993111
183.0318@0.99316126	4008875	3973056	1	2821901	3096794	1	1	2157199	4786277	3274541	3148306	1	1137293	3349658	2268269	5259674	1067931	3706361	1	1	3409689	4014158	4055971	4039171	3455217	3646594	1173604	4079524	2203647	3140828	2864124	3955097	3459275	3610230	3367086	3276782	2283844	(184.03943, 921443.9)(185.04234, 74117.26)(186.03667, 38988.87)(187.04102, 3843.1953)	0.993161
345.0886@0.99054056	1798359	1776661	1443115	1623998	1323078	1861891	1440312	1506266	2086820	434762	2093005	2038368	2325006	1937019	1847510	2404399	1704428	2169388	1855627	1798667	2230708	1796255	1893233	1800495	1639490	1590583	1418771	1345763	958542	1369273	1332416	1744372	1577669	1594223	1401713	1446930	1366093	(346.09286, 386518.56)(347.09543, 59058.34)(348.0917, 23775.406)(349.0969, 4125.4897)(384.0465, 10602.699)(368.0749, 11390.31)	0.990541
510.1669@0.99235296	61818	42556	29401	34655	1	44788	1	1	61034	37394	69999	61788	67477	53002	64072	85909	89028	81003	53604	39917	55594	46752	120075	50749	55973	51939	46626	60155	36343	52987	86491	69798	85640	48067	29863	38973	38896	(511.17285, 24933.396)(512.1759, 6507.8535)(513.1754, 3824.46)	0.992353
590.1233@0.9924516	53332	36573	1	29137	1	32358	1	1	49766	1	64073	52981	60056	41429	59496	78153	72217	70651	43579	33078	46773	42274	108367	39167	43715	42894	37743	48168	27650	39220	74846	56564	72845	36911	1	33770	33131	(591.1296, 21305.268)(592.1329, 5886.1753)(593.131, 4432.269)(629.0856, 2873.85)	0.992452
477.1327@0.9911387	74163	68753	51878	71562	55240	76358	75172	60127	1	45284	57624	52938	61286	40381	46713	62618	61987	49726	48700	66916	62412	56834	49160	45194	55226	41833	68238	62390	42627	57079	51126	48905	42325	58351	50333	50975	61480	(478.13852, 16406.371)(479.1418, 4281.396)	0.991139
315.0758@0.9906113	136717	124629	100611	138166	107323	129449	138653	100425	76409	72084	96650	75645	1	67425	80535	101697	97421	82399	88741	117081	101072	110217	98493	67651	96670	63723	135714	118329	86296	111408	100553	102631	91667	116122	112133	104879	121673	(316.08124, 25274.21)(317.08463, 4303.34)	0.990611
425.0444@0.9885135	180429	173925	138038	188286	148663	180948	154979	135885	220100	190691	209300	211664	209172	175029	208682	237228	224404	224375	208124	129472	184806	162677	212313	194206	150384	173339	157210	156687	122400	147213	152177	164085	168388	121367	107330	158264	131895	(851.09546, 5112.347)(426.0491, 43501.99)(427.0527, 7568.83)(428.04724, 5289.8794)	0.988514
204.0896@1.0011935	21418000	19980436	15576549	23643000	15744112	19731604	18107876	13659824	26529628	24580746	32541048	1	32248240	28140480	1	32630070	1	28922376	27959360	1	26317110	26403654	29764230	20243152	27715466	22406878	1	29592288	17340528	21777382	17782660	1	21919628	27110640	22226512	21712704	20099594	(205.09601, 4125778.5)(206.0968, 412327.25)(207.09863, 30482.365)(208.10507, 0.0)	1.00119
307.1258@1.0285406	406116	225654	701169	329207	622027	499203	565569	417741	2147637	1437837	1765120	3006639	2825682	3893288	2131031	444663	1832495	3179678	1454085	1314338	409409	2720785	5628837	1888175	2820209	2039921	330326	2265030	1665890	2188898	3344430	5545328	3651779	301079	178013	1608701	1844615	(308.1324, 382025.2)(309.13525, 44383.67)(310.13675, 9629.37)(346.0908, 199719.27)	1.02854
131.0943@1.0745277	937722	735581	750675	698433	553457	893343	694501	750556	679347	509299	680139	550003	533796	569864	553580	700323	628794	703896	573770	537773	841211	498049	951563	633744	276103	748466	581357	1	570329	573229	897404	515401	778564	806752	615808	583900	583723	(132.10155, 105916.54)(133.10356, 8539.304)	1.07453
149.0507@1.1414446	570830	299918	337379	321656	312790	273333	404458	687213	249592	268796	218511	213301	531830	111334	219716	211891	128481	249930	185799	438924	538134	497147	236696	524536	455180	292537	294180	237123	142663	1	377887	136267	181011	117233	275196	175270	132665	(150.05711, 60110.703)(151.06061, 5894.9956)(152.05405, 7142.224)(132.04735, 15851.03)(133.05841, 1810.0051)	1.14144
311.104@1.1901946	1497028	918488	1	873581	598783	1125964	1161561	1775997	853903	541656	665672	700018	598022	392996	716238	879982	339317	489218	662543	654629	1508446	356320	447379	402799	486902	1033199	884321	759766	270716	342485	571326	241904	607081	400445	351387	640816	499358	(312.1113, 84383.83)(313.11417, 11799.274)(314.1104, 5862.3213)(294.10052, 44063.453)(295.10333, 6766.58)(350.06677, 3798.2104)(334.0933, 6904.5176)	1.19019
295.1081@1.1657333	1	217964	120261	119474	1	124722	125393	121500	261085	1	35543	38808	1	1	34051	20986	146474	179283	207386	210615	1	1	197547	290431	87223	316414	204790	188548	226901	120369	209969	147950	188063	153774	155270	229392	218952	(296.11435, 25687.352)(297.11755, 4036.3918)(298.10748, 5413.896)	1.16573
192.0266@1.200913	1	1	1	1	1	1	1	1	1	1	1	1	76299	23915	36744	1	1	56539	84597	92231	107019	119092	496344	184818	95420	70382	60829	207206	230376	204923	278901	475004	454345	285474	278534	322880	492550	(407.04193, 4282.418)(193.03392, 7648.043)(175.02315, 19489.793)(176.0276, 2897.84)(230.98924, 6022.3174)(210.0606, 12854.991)(215.01581, 15046.616)	1.20091
521.196@1.0315335	65466	69628	137200	67979	1	82218	74810	1	1	51919	75509	73055	1	58452	73499	1	71242	68857	62384	88646	93139	72550	1	59769	1	113947	144775	94127	61014	217705	48211	55139	202287	340578	287429	230829	57312	(522.20294, 21659.01)(523.2061, 4680.7075)	1.03153
1062.2502@0.9992143	1	16981	1	24221	27851	1	25254	18218	20514	19036	23178	17849	31003	15580	23675	1	28202	19894	26889	29090	23132	34096	23849	1	35263	1	24153	32259	45135	18788	1	27418	1	44891	29126	1	46820	(532.13763, 8489.01)(532.63947, 3527.2766)(1063.2583, 9098.702)(1064.2665, 4456.6694)(1065.2596, 3440.56)	0.999214
129.0423@1.3455625	484347	304921	299877	353646	260728	356410	339662	385379	393247	291121	322544	384131	454811	1	1	291445	315727	1	357635	391642	456323	428594	618624	600342	486633	550450	458052	1	494934	534193	561185	626666	1	551243	536817	545071	462639	(259.0919, 3084.336)(130.04942, 72684.92)(131.05232, 5389.33)(152.03227, 3259.2317)	1.34556
164.0466@1.4018574	326823	250373	1	180967	1	213707	256871	193436	293545	214397	296293	322569	343020	290909	303893	494327	452064	542326	267958	230144	257350	247990	439105	272740	288446	336065	386558	309389	245854	325356	391563	256893	408004	309736	256209	279906	279259	(165.05391, 7599.611)(182.08047, 56213.566)(183.08391, 6162.862)	1.40186
246.114@1.7305945	3919580	1944610	3441265	3241784	1182990	2090918	1978929	2145097	1349438	4001181	3940650	1977119	1754055	1912456	3177249	5493410	2282005	1285340	5242603	1392350	3041820	1865628	2145459	3035924	1786545	4204085	3082884	1851271	5792053	3514095	1284145	3767363	3089814	6161291	4475958	2258697	1146626	(247.12389, 464149.34)(248.12663, 47443.758)(249.12836, 6833.7993)	1.73059
238.0952@1.8671081	1322685	916627	826630	1236601	1051763	1174688	881953	848476	1257081	910551	915057	749540	678988	589703	722440	565173	641868	706996	1296076	761222	776489	859554	686103	744629	636397	804735	706799	718426	726702	651490	404618	614282	582742	825077	751379	721797	529462	(239.10254, 126907.74)(240.10544, 16352.696)(241.11165, 3603.83)	1.86711
220.0846@1.9708822	843992	739366	821037	796177	586691	832082	799670	782698	1164358	1193322	1142624	1043637	1084137	928213	1017763	1	1	886917	1265130	1019780	976331	1	1058940	1039226	861149	1242197	981018	957627	908268	896404	843981	1071479	955311	1052330	990156	1022006	900698	(221.09186, 138748.11)(222.0952, 18310.78)(223.09785, 2684.295)	1.97088
425.0447@2.0457997	170157	143966	104461	139156	1	178414	112559	129344	223252	203453	173372	190063	193229	163723	227306	266549	179602	208474	160488	138268	275314	123133	174139	176454	1	178266	163745	125669	1	1	1	123190	114190	96195	1	89510	1	(851.0944, 3295.2)(426.05203, 22138.135)(427.05475, 4107.032)(428.0504, 3283.725)	2.0458
345.0883@2.0504327	2409610	2064332	1731462	1995832	1321779	2356285	1748650	2072846	2933330	2711981	2312238	2668037	2692196	2416816	2929905	3179109	2587895	2548127	2417653	2070678	3281045	1677601	2378308	2454489	1554762	2392147	2388072	1959566	1198804	1199421	1361493	1829256	1789832	1684966	1323304	1432484	1351404	(346.0959, 245249.73)(347.09836, 38442.9)(348.09482, 15904.058)(349.09628, 3040.2922)(384.05112, 4985.8604)(368.0771, 17172.69)(369.08008, 3434.0579)	2.05043
183.0353@2.0499728	5250141	4449998	3509892	4221433	2751317	5047805	3518162	4410018	6650420	6005587	5566131	5863942	6021732	5286507	6693790	7647205	5756507	6085012	5366157	4486776	7671910	3782841	5236362	5469210	3233891	5585340	4981410	3874907	3007340	2468654	2617859	3848805	3574052	3252807	2590740	3076022	2640270	(184.04243, 653953.8)(185.04515, 53404.09)(186.03961, 27703.898)(187.0425, 3319.2075)	2.04997
770.1312@2.0487027	105098	62421	55651	86682	29063	106427	56768	82848	183111	154708	126625	137857	152458	125504	180883	87207	133614	158090	119009	80256	233954	61648	115456	109546	49248	123017	106222	66290	38674	22461	32466	65275	47590	38421	21500	40436	31877	(771.13904, 8963.152)(772.1418, 4058.246)(773.13824, 3152.0032)(809.08984, 3473.59)(793.1204, 7757.711)(794.12244, 3368.5378)(795.1108, 3408.0303)	2.0487
190.0736@2.1011667	1	128337	1	276850	1	1	123727	1	94848	147364	336670	337870	364559	350584	312226	291640	359407	255096	137636	272198	204763	1	394666	149298	217670	161148	261317	313620	1	256585	356115	294666	293983	387787	181610	148537	317364	(191.08101, 51101.387)(192.0839, 6274.6216)	2.10117
261.1213@2.2499168	635781	185243	470415	591559	316387	388829	1	455502	378622	520711	602438	620124	431654	332819	419955	741431	587014	360103	426280	434541	389596	124799	452608	301149	348657	479504	785634	390754	303543	353169	597898	494857	683417	385649	366079	451700	293021	(545.2312, 5527.585)(262.12836, 22432.867)(263.13132, 3614.641)(300.0844, 7497.4404)(279.15503, 38282.34)(280.15762, 5384.6465)(284.1104, 23674.082)(285.11362, 3606.3232)	2.24992
336.1321@2.3755136	262694	230482	132225	228673	136598	226713	179310	161924	345199	303104	361830	415133	379994	321266	438895	430048	352068	302094	339218	228640	332709	244321	238221	223020	173678	196356	242512	231220	46719	123528	116484	211825	123136	165739	133391	132788	129549	(337.13956, 38335.785)(338.1425, 7253.7383)	2.37551
252.1114@2.4895136	1218618	927624	934785	776584	564555	901287	891064	726777	2551398	2007672	2035947	2483105	1893943	2753377	2139791	2800905	1852992	1875741	2150821	1758112	1724677	1353057	2225749	1772931	1278107	2053906	1669099	1513893	1907060	2220365	2271299	2274921	2943377	1908008	1632155	2068653	1929273	(253.1185, 237176.22)(254.1213, 31686.807)(255.12315, 4827.1333)	2.48951
309.0889@2.629303	454245	1	417419	349028	242548	355465	228630	1	706670	469434	362034	383937	337421	315867	368702	588503	373821	1	325219	399689	587334	348279	422821	1	334727	630232	488673	419140	459664	463729	381624	394794	665347	710279	546446	768532	495500	(310.09604, 63441.984)(311.09955, 8426.632)(312.09512, 4992.1177)(332.079, 5190.6777)	2.6293
352.1274@2.717675	314711	241784	212671	280062	168595	252589	256023	249794	463981	466669	449934	414601	430887	350408	420546	532593	398981	363251	388122	288209	378411	300236	277360	320828	264377	336653	335045	280593	176865	200995	174687	254730	209543	219477	202183	236494	181041	(353.13464, 57246.65)(354.13763, 10256.89)(355.13934, 2701.065)	2.71767
174.0792@2.9490273	2866924	2526449	1701033	3855992	2092276	2472825	1816855	2562170	3722763	3863633	5894775	4602929	4815548	4914968	5612139	4972595	4333401	3949305	3811069	2981313	3295685	3046572	4408786	3805422	2628133	3467234	3757039	3296221	2199725	3635293	3707653	5758524	3170296	4384034	2982346	2477228	3904312	(175.08655, 670282.6)(176.08934, 64693.797)(177.09178, 5148.908)	2.94903
382.1379@3.0754113	42961	60243	68266	62894	40159	63280	74378	48900	60061	78866	79695	58019	77530	1	56904	98342	73868	62656	93082	63312	70262	72874	55832	65271	62846	85536	73788	63884	57158	49870	1	1	55831	81748	81889	59825	57933	(383.14536, 26158.617)(384.14816, 5260.928)	3.07541
366.1439@3.1068382	5607798	6603607	5467197	5308204	3790128	6254424	6868351	5064527	7100893	8669130	7369271	7737021	8088975	6733225	7874145	10701932	8427904	8552584	7538898	5579741	6473820	5813072	5347138	5878943	5407188	6324147	6352363	5191304	4145773	4806124	4791590	4136885	5244306	5175609	4745847	4873435	4014979	(733.29333, 67765.27)(734.296, 24285.596)(735.29816, 7181.5854)(367.1512, 2100481.0)(368.1544, 363346.5)(369.15582, 52983.957)(370.15796, 5487.135)	3.10684
625.0219@3.1796489	136098	160138	153082	86698	180970	158952	105592	200015	212944	184412	172405	163546	172188	153528	182641	170898	93248	162119	76688	199690	202300	88706	178868	166749	93062	205357	209773	175235	90691	171201	130436	175189	161655	202324	169686	181219	63492	(626.02936, 19299.145)(627.03186, 5435.578)(628.02936, 4662.6494)	3.17965
637.2039@3.1778648	122093	81308	63300	122701	79026	90989	121873	95901	101962	95252	113693	76813	103796	58359	100512	130347	101722	84148	133151	141389	152522	109291	121483	79829	105303	133135	151626	128114	105564	91058	54957	95678	93651	130437	99578	105893	106518	(638.2111, 29314.182)(639.214, 8809.55)(640.2129, 3768.5156)	3.17786
1062.248@3.177838	184047	113065	95737	185587	112586	123035	172213	142021	138101	131984	153414	106962	139565	76718	128855	190074	136128	119754	191824	192990	226266	155153	172898	111018	139679	180272	217921	173930	135634	125241	76436	140284	132001	178120	137234	159452	147151	(1063.2554, 28838.207)(1064.258, 13256.531)(1065.2559, 8030.539)(1066.2574, 3236.011)(1085.2363, 5580.68)(1086.2393, 3071.554)	3.17784
425.0453@3.1767	71664	71142	64382	76922	1	1	78568	67627	71622	63582	64854	63574	73547	54035	73086	88001	1	44654	88079	89307	99288	71200	60338	58474	67839	77718	94424	82778	1	50599	1	72497	61067	86481	1	77009	1	(426.05228, 16275.015)(427.06848, 3935.6055)	3.1767
571.1027@3.178054	215009	196261	166422	236177	201541	205145	236677	220456	217506	209408	183771	187590	209883	161712	212468	220175	217029	202658	226021	258060	269980	197776	217196	182696	99467	241354	274072	245113	182796	196839	167449	217088	207516	238685	216934	208337	226921	(1143.2114, 3054.3)(572.11017, 22572.479)(573.1133, 5423.3535)(574.10944, 3474.8933)(589.1365, 9185.623)(590.13934, 2577.175)(594.0916, 12573.234)(595.0941, 3304.16)(596.08093, 3148.9043)	3.17805
491.1472@3.1781623	1636992	1301689	1163847	1707926	1304548	1375573	1665089	1530309	1488711	1433301	1547415	1119813	1482242	1027200	1401587	1769439	1447185	1315633	1827475	1826543	2008121	1576832	1602199	1309739	1478009	1809711	1930875	1724151	1448626	1364265	913764	1474116	1365479	1696108	1289664	1573263	1523141	(983.2986, 21635.406)(984.3016, 9800.892)(985.3004, 5030.141)(492.15445, 271451.56)(493.15692, 56351.805)(494.1544, 21163.537)(495.1564, 4138.8037)(509.17905, 2798.242)(514.1352, 10276.001)(515.1392, 2846.408)	3.17816
345.0882@3.18775	93588	75551	62780	102269	95769	83563	99354	94530	97748	1	98830	1	95747	1	1	108651	92835	1	1	144957	150522	100137	100555	1	98116	112425	122770	119819	106385	82866	1	92059	107681	118260	107214	114001	1	(346.09543, 25321.123)(347.1097, 4961.021)	3.18775
329.0939@3.178162	4276754	3527627	3125598	4406373	3480888	3633023	4297600	4149909	4030929	3933893	4138592	3375824	3903752	2856586	3827185	4564288	3915424	3412013	4676936	4754024	5084705	4140475	4240714	3604227	4000033	4784106	4937883	4451618	3958824	3709951	2742981	3884629	3730714	4496878	3926400	4098625	4080266	(330.10104, 921016.1)(331.10397, 122579.78)(332.1001, 46610.973)(333.1019, 6836.957)	3.17816
921.0025@3.1835427	105579	104121	82756	151800	122854	114044	145975	130271	141220	128163	139340	139939	144617	130360	155474	164759	170141	132308	165216	174503	157438	1	137662	142633	109374	1	193511	186928	66609	113540	84850	130591	127106	188039	155990	117313	127892	(922.0098, 32139.99)(923.0121, 6077.653)	3.18354
183.035@3.1978111	425741	112360	103543	425844	417800	356010	124534	119745	99261	404132	518719	345881	484614	298727	464722	128270	390322	361226	518076	598097	668493	89005	514209	92349	419043	512310	625726	526511	436043	79784	277458	474399	460267	556317	471283	493579	500859	(184.04231, 85742.09)(185.04488, 8978.742)(186.0398, 5360.39)	3.19781
131.0405@3.178162	3246615	2080412	2543275	2304823	1792832	1944622	1905054	2329155	1513382	1776355	1433149	1213493	1118105	700664	1081457	1427875	1077449	1542279	1113312	985720	1643013	1032750	1483878	1024974	580259	1512251	1494906	1595615	926131	1571317	1473682	1246991	1387615	1179783	1484932	1642194	1301247	(132.04779, 273288.62)(133.05072, 18120.562)(134.04483, 12657.478)	3.17816
477.1311@3.2754724	86667	75272	62699	78246	48582	79496	81243	85140	64093	58173	59030	51379	55043	45410	52054	80775	58748	52854	60268	61345	74991	57467	55838	52110	53822	59956	76444	53757	49698	154992	1	45339	51941	57135	45257	55182	48876	(478.13977, 18048.09)(479.14313, 4123.496)(500.12003, 2872.8237)	3.27547
315.0781@3.2535942	257363	223223	197256	239973	158692	237813	234719	235102	184322	192691	194161	159290	173394	134363	171269	244825	178603	169141	188012	191019	225662	179031	174758	163578	164410	189426	222847	173972	148274	139154	143926	139550	159417	175394	149593	161891	160981	(316.08508, 50076.47)(317.08798, 8085.485)(318.08792, 3613.1035)	3.25359
253.1538@3.257667	50237	72917	68039	47962	1	101983	64060	60243	1	66691	1	1	1	1	61467	66905	1	1	65563	62184	92991	74228	80233	63425	80816	72884	72215	59142	65292	79927	69940	1	61902	70876	62445	1	69622	(254.16104, 28292.639)(255.16312, 4124.273)	3.25767
366.1431@3.2770543	183647	186216	147303	181733	129226	206641	186822	152109	222230	247690	267148	254104	276569	221257	267483	335103	267418	234632	263122	194230	228444	215845	215219	197923	198134	212619	228119	199727	137159	159479	143110	163700	171903	197422	175321	164785	148610	(367.15045, 76029.09)(368.15314, 14284.229)(369.15402, 3104.89)	3.27705
204.09@3.3531892	32496006	30042682	24847470	67520	22176678	31750726	29719598	28116042	42099652	41285648	41563172	37400976	42797248	36432652	40874396	45089660	41486956	37167292	43456656	38488044	99699	37779880	41100292	37526488	35693644	42203400	94253	37781704	30903168	33084182	30366100	39267756	33942784	37606804	98091	33810124	32750742	(409.1873, 26594.523)(410.19, 7028.2754)(205.09729, 5827441.0)(206.1004, 624129.8)(207.10268, 59190.438)(208.1049, 0.0)	3.35319
194.115@3.3744686	64171	33344	41711	1	1	16060	33922	1	27732	14177	14589	1	55365	70167	33143	22490	23926	38804	36203	45758	27386	61238	56582	25447	72721	37934	27380	35481	32483	14365	40178	1	35972	56482	55048	35328	35079	(195.12212, 7289.9966)(217.10431, 7409.7563)	3.37447
382.148@3.6431036	1	120140	1	122363	1	128956	107421	125745	145570	176751	1	146671	158896	327078	1	138418	217353	197554	268663	1	250105	218283	1	245311	252422	282093	1	226630	228170	171583	343828	215836	205603	25089	197532	174889	249811	(383.1551, 14899.559)(384.15765, 3601.369)(365.14474, 10849.103)(366.151, 3469.62)(421.11182, 4230.7437)(400.1793, 4476.375)(405.13733, 45704.91)(406.14062, 7850.486)	3.6431
396.1542@3.4324322	420625	490987	498445	480066	294882	485400	590648	414290	477833	632264	616254	440825	525583	302844	402481	698880	504750	468275	617411	514894	546820	512669	460877	464036	421321	558378	600629	433774	390605	416794	337694	327232	412382	539297	502320	441557	384973	(397.1615, 187256.34)(398.164, 35249.152)(399.16562, 6370.006)	3.43243
300.088@3.4894054	87959	63765	63029	53295	41082	64942	68560	52255	140194	100815	113611	113891	125826	107627	97773	135493	85476	113648	105098	75520	105057	99831	133618	90183	92475	97979	84876	87265	24970	111648	101735	115447	134091	110688	92476	121726	97167	(301.0954, 18105.072)(302.1071, 3507.0125)(283.08267, 4755.8687)(318.12286, 7470.86)(323.07587, 6912.6406)	3.48941
138.0326@3.5801942	137637	1	132289	190083	272036	272432	125694	147613	193710	165232	150024	166902	181684	180015	184236	209496	158864	159591	163180	124546	168569	143652	178172	155702	122948	160220	236829	122253	92524	141864	152401	155116	210363	183078	131176	172546	146010	(139.04077, 50470.33)(140.0462, 4205.1274)	3.58019
426.2012@3.5001888	159113	152139	146687	150566	117995	146854	156521	127184	129455	128096	141562	130839	133137	93844	110569	183028	134946	99312	139946	108976	109747	106181	109971	104227	93484	137129	130344	103815	82630	97954	94964	88436	104478	111523	104647	91742	82678	(427.2083, 46369.234)(428.21152, 10481.234)	3.50019
234.1376@3.4650004	1259391	90566	764657	111116	624700	1048038	97379	702173	1391345	1568353	98441	1492898	1545950	1154822	100486	1959450	1750516	919169	1424109	1042744	1194025	879884	1226417	936298	920341	1341620	96631	1025007	619852	959062	794518	1279102	1100434	851638	740689	815618	880262	(469.2815, 4272.965)(235.14471, 197039.34)(236.14735, 27641.824)(237.15001, 3841.1614)	3.465
442.1954@3.5574594	443778	343728	222985	366792	307686	425116	352042	273146	379600	277653	267294	258390	214423	173421	227457	226835	226905	281215	361555	153785	235598	207761	131325	166239	140575	166861	183737	135734	127681	153241	102425	94750	139858	158154	151549	139737	98347	(443.20264, 74581.92)(444.20557, 16264.9375)(445.20764, 4105.049)	3.55746
264.1479@3.6024735	1	1	1	1	1	1	1	14785728	14615671	19209764	1	1	1	1	1	1	1	1	1	45918	47163	40906	1	40813	32745	16308767	1	38421	20614	28222	25291	36434	31855	28332	21285	29506	26892	(529.30206, 38698.277)(530.3055, 47482.062)(531.3082, 9000.088)(133.0811, 37074.15)(133.58267, 7058.695)(265.155, 606140.2)(266.15848, 408284.12)(267.15942, 41773.45)(268.16016, 2288.8232)(287.13644, 4887.947)	3.60247
510.1852@3.5938637	33458	1	1	38939	1	1	58861	1	1	93527	111929	127004	61585	75846	55059	63519	88045	99799	47910	1	1	49161	1	1	27349	1	52207	46164	1	33299	88868	47212	49755	41483	1	1	1	(511.19275, 15355.278)(512.19507, 4389.9116)	3.59386
406.165@3.6124058	218308	198756	170929	261843	149228	205607	220912	223681	581987	502809	639661	711295	691859	389819	735001	448755	625951	502168	492336	362801	314117	420257	674670	390596	332501	440171	273139	373247	220417	158122	342384	374657	305597	311523	262017	309476	368974	(813.33466, 5885.8374)(204.08975, 124366.0)(204.59116, 31729.43)(407.17136, 25986.0)(408.1744, 6878.3687)	3.61241
357.1424@3.6037836	45974	33950	32106	37144	30016	29203	43365	27984	50481	46938	42529	47787	50311	34605	45487	60250	43692	41600	41720	42787	40176	41476	38003	33753	35284	41798	46213	35865	26715	29428	28854	32184	35471	30062	25888	33335	30358	(358.14987, 6846.73)(380.1316, 8555.172)	3.60378
437.144@3.6108105	347541	254291	221018	191320	142155	278498	249594	275503	177571	171759	131819	150399	152829	161872	150777	170470	161921	250668	112554	118002	132797	106288	195877	152628	120738	121363	154657	119463	119623	144091	222394	173152	247079	92322	69032	175086	134966	(438.15112, 56889.73)(439.15463, 12754.175)(440.1523, 4154.264)	3.61081
280.1423@3.6308563	368935	205430	1	320821	157308	265699	202654	139112	227588	57093	79734	111264	133776	120388	156196	74966	131922	114724	281481	121407	167599	141859	73525	136458	94310	128254	131839	131735	83684	64737	1	70557	113056	138175	122942	129834	86491	(281.14957, 30775.633)(282.1526, 5332.434)	3.63086
382.1478@3.734457	132217	21760	94815	17969	49344	28452	17623	1	21885	1	177028	33049	31614	60873	200383	22362	41371	37398	41562	222924	30008	35220	241042	29186	42509	107177	152678	43904	37180	30595	87443	41895	56326	285947	46534	24891	42187	(383.15448, 10384.205)(384.14902, 6080.17)(365.1449, 7260.392)(421.11182, 4902.8975)(400.1792, 3914.9438)(405.13754, 19842.037)(406.14075, 6670.3843)	3.73446
314.1002@3.6594574	381864	29255	1	335912	1	332944	338991	297278	459500	432573	422067	472497	520960	443588	549770	571669	464211	470024	434957	370955	504975	380107	464455	408537	359997	431307	402656	386689	382736	429987	417130	456239	521976	376097	331426	402466	326078	(315.10785, 6896.9473)(297.09717, 3936.0354)(353.06363, 7022.0034)(332.1343, 65360.883)(333.13742, 10363.9795)(334.1235, 3451.59)(337.08963, 35397.96)(338.09357, 5778.5215)(339.0776, 3008.31)	3.65946
562.2169@3.6730268	155399	140515	110320	136071	91505	174630	130125	138233	160926	184993	190912	159859	181496	141377	163202	223749	172593	132644	180870	137405	184532	141803	152035	132693	123760	156731	143037	124639	109628	95886	100678	113817	104701	138776	119590	119423	108419	(563.2243, 51168.426)(564.227, 14758.76)(565.2297, 3909.222)	3.67303
452.1436@3.6867568	79838	88623	76814	91720	44201	98142	135430	67925	102622	268443	278956	375491	234063	284192	184758	218844	317048	259796	168551	96050	103620	147354	100096	113930	168749	112424	106199	130470	71545	100549	217883	145466	145012	114556	82837	85725	99034	(453.15134, 60187.63)(454.1542, 12892.146)(455.15646, 4551.598)	3.68676
406.1651@3.7114863	92650	86002	68602	106760	54957	110245	96642	83770	243527	222203	280965	279947	307317	205126	284981	245787	327551	235421	234063	181562	149609	209067	335370	179196	188163	200935	145424	193614	122694	89626	177310	208915	146464	171866	149563	165956	182157	(204.0899, 55582.21)(204.59138, 13954.51)(407.17157, 16571.088)(408.17505, 5221.662)	3.71149
562.2164@3.7285404	85143	68530	48217	62279	44420	97891	58798	59003	86012	83736	104052	79217	97547	75145	92249	117340	93747	72886	85978	68960	104075	81815	85440	72861	74682	64380	76745	74243	66016	61780	49482	68566	67274	79134	70319	65353	55153	(563.2239, 26786.152)(564.2271, 8184.751)	3.72854
234.1004@3.7656667	68336	1	1	105155	1	1	1	1	79088	135764	134630	54995	99114	1	1	113440	100434	87915	131152	108590	118401	83963	138064	67089	70631	129879	113136	102607	1	91783	1	152291	98671	92715	103656	105951	105068	(235.1073, 26490.889)(236.11076, 3976.1226)(217.0866, 6612.49)	3.76567
264.1479@3.811394	18352226	16557341	13504592	20194482	12170961	12865520	18212116	1	1	1	20305306	19957970	19129162	17860004	17101230	23235876	21285384	13763465	15770716	14094864	13458108	12168890	15080788	11819302	11812008	1	16739800	13245561	9372606	10583052	12028129	13734500	12330769	11176650	8340489	10767196	10987625	(529.30304, 151808.58)(530.30554, 44405.754)(531.30774, 8241.622)(551.282, 5178.0703)(133.081, 35795.89)(133.58273, 6201.302)(265.15518, 2623155.2)(266.15842, 373490.28)(267.15927, 38250.57)(268.1589, 1660.5052)(287.1362, 5307.709)	3.81139
176.0471@3.7448282	442111	394721	46166	482848	39357	37828	1	393585	69841	535564	49360	45675	510552	67518	426116	620358	471527	330698	418036	261571	346994	86370	365758	303622	67513	1	399609	303261	68875	267196	312758	349082	76724	249796	48621	263089	289013	(353.0632, 5687.635)(177.04898, 61586.38)(178.05629, 9530.124)	3.74483
510.1851@3.8560286	31955	31980	32094	33829	1	31205	55361	35620	39910	116744	106450	107133	56515	69572	47028	59123	73149	88929	59009	28768	40554	55587	34500	49659	54667	39943	46164	42913	1	32452	98759	47955	50428	44304	36052	26551	29244	(511.19257, 20627.465)(512.19556, 5656.1807)	3.85603
250.1326@3.871594	444155	242629	189516	480696	353457	304094	103719	253500	345022	152581	360358	252560	197275	223528	279892	149874	171430	221161	307199	146084	188251	184522	202982	193008	124983	174764	169456	153545	131400	193927	142934	263253	146448	218628	163732	141781	164974	(251.14088, 62920.934)(252.14377, 9492.806)(253.1359, 3093.98)	3.87159
539.2167@3.8912709	126009	100810	80476	114952	94918	115101	133992	86836	118308	107453	116969	117503	72320	65314	65965	56579	83762	90358	122476	61328	68129	90995	67102	78062	71749	63133	63689	64397	58781	61439	70562	60263	61661	76828	68883	64307	49989	(540.2224, 24697.459)(541.2235, 6973.47)	3.89127
473.1119@3.8019998	56063	62755	57373	68210	42830	49116	86433	53723	41207	76874	65219	61030	54306	52952	42491	56247	56725	49974	60950	45690	57040	53067	40665	44730	51036	46929	59719	42714	1	1	66682	38123	42715	49768	1	1	43278	(474.12125, 16318.193)(475.12634, 3843.8416)	3.802
648.2181@3.9096875	1	1	36413	27112	1	1	42614	40763	33427	44319	60873	70038	59863	50915	59541	59107	62539	65303	35192	39787	40442	36342	34903	33725	41415	57141	50523	36643	33773	37753	29677	1	42831	58359	38566	46809	26631	(649.2271, 14207.891)(650.22986, 4984.0825)	3.90969
330.1024@3.9034166	53595	40748	26593	50692	36249	35319	48088	43683	36617	17730	34258	22606	29438	21238	30018	47065	39481	42434	1	30132	51706	41476	32366	33150	32132	25052	42981	36498	26702	25799	34107	23808	36811	39907	41170	22565	38486	(331.10858, 5221.368)(348.13458, 5435.0815)(349.1464, 2798.35)(353.09082, 5928.102)	3.90342
332.15@3.936125	84402	65580	78824	1	1	1	104916	1	1	87367	77632	76936	89620	122152	58964	89462	56702	80694	82175	1	1	51547	54995	68203	1	80929	1	55098	1	39571	1	1	74112	86110	74944	1	52392	(333.15732, 15935.675)(334.15543, 3750.2207)(335.144, 3407.5867)	3.93613
662.2327@3.9939334	20970	32144	51333	59611	49282	1	62898	145051	358131	34763	51645	117271	32107	58498	111457	27713	70098	83432	360044	45642	33273	1	1	296221	51906	92323	86208	48896	200170	1	140337	141390	1	32634	1	26107	1	(663.2421, 26804.041)(664.2453, 9113.001)(665.24457, 4789.2886)	3.99393
422.0722@3.9880998	58178	51502	48000	1	1	60604	1	1	152682	179359	102492	168655	149337	181234	160249	91292	202838	182015	116658	62460	1	1	115778	68334	254047	102091	62416	72837	1	356593	297535	215199	194814	76632	68432	152587	113804	(423.0787, 35153.797)(424.08157, 7529.5796)	3.9881
491.191@3.9909194	93837	100873	78828	92201	40202	83174	123372	71752	148065	178753	201451	168595	176455	123787	152708	203882	194367	132970	145333	120202	139068	136819	157587	127351	109469	113589	123326	111770	77086	118274	114003	140036	122120	128877	92058	106796	99624	(492.19833, 27785.635)(493.20126, 7594.4653)(494.21072, 5071.252)	3.99092
466.1965@3.9900622	78715	131531	118326	77639	70821	1	105466	109092	66558	203793	33850	34399	95513	1	72553	182004	128281	64172	64308	95732	1	1	64774	113852	79954	38517	143973	22127	56785	57567	82184	54552	1	91245	74330	147288	42993	(234.11676, 14270.414)(234.6195, 4115.223)(467.20648, 21392.049)(468.2077, 5550.966)	3.99006
442.148@4.0637426	39963	36073	118543	153070	47577	94780	40227	84823	175942	62615	80153	186516	151945	180556	67755	1	71014	89984	104924	73857	43301	61098	55060	118542	106484	1	26856	87649	63571	54302	39157	134554	136330	95107	71499	98746	84349	(443.15616, 21791.508)(444.15976, 5716.461)(445.1558, 3095.275)(425.14297, 6735.9897)(426.1487, 3195.02)	4.06374
154.0262@4.001189	315744	205754	161440	298019	210188	260358	233130	236924	238672	232326	213433	218168	168283	184927	231178	188862	225381	213345	218833	177748	200529	223656	168449	214965	195366	218776	231272	245315	147879	287189	251269	203175	218558	214859	176606	204800	193794	(309.05917, 9363.778)(155.03354, 68175.875)(156.0371, 5742.323)(137.02423, 8928.047)	4.00119
519.1861@4.075903	35715	1	1	1	1	1	25392	22841	40628	45390	41391	35322	34531	37666	32164	47549	64469	33603	46370	34768	50656	37598	1	37503	33964	46749	54921	36012	36653	46168	43109	42913	57685	40864	42032	41392	43340	(260.60046, 14842.845)(261.10028, 4397.18)(520.19446, 10536.852)(521.1975, 3663.1191)	4.0759
218.1055@4.006054	173082	138749	92320	154231	92564	137860	139612	131670	246435	296447	249539	266993	230617	202903	284290	304313	282842	214261	211608	169281	176025	158596	169275	161370	163116	203996	165380	177737	80040	104462	118816	132716	113851	103787	79893	136582	100705	(219.11258, 55472.97)(220.11551, 7634.572)	4.00605
475.1948@4.016444	111531	93280	72394	100853	48633	83667	120261	62066	111621	227134	218768	182414	208106	176150	197996	192398	198780	179795	176803	151897	152498	144640	98640	207748	84644	83161	146797	182338	49386	61541	1	81571	62231	161200	122816	67331	60334	(476.2023, 20478.86)(477.20444, 5840.264)(478.19305, 18262.307)(479.19516, 4858.5854)	4.01644
234.1367@4.013027	627216	602831	424615	848698	430985	481709	579363	440770	561957	721904	818747	674461	674592	525965	642487	777430	777570	457752	597355	508924	499105	497124	561814	421201	429120	634610	721641	524112	326553	393420	328467	621786	477041	414534	318290	357287	398556	(235.14392, 162564.92)(236.1468, 22606.816)(237.14867, 3359.8286)	4.01303
426.1633@3.9405932	49222	42474	37210	46396	1	46340	40069	1	1	54059	41042	57554	50566	46615	1	41128	52589	46207	37982	39365	26717	29349	74812	48086	58033	42812	42629	46801	42265	42927	62754	85693	61203	40947	1	51786	37031	(427.1812, 16376.371)(428.1834, 4015.552)	3.94059
400.1633@4.0268645	169076	143636	115262	155323	93870	147134	148670	145120	200014	216355	217705	211689	234171	207836	215051	201513	202718	217900	204801	185152	187331	165215	225156	151726	160477	196089	163668	182322	125084	126878	146523	200976	158640	157076	122420	161139	136228	(401.1708, 49599.74)(402.17377, 11460.716)(403.17505, 2889.2932)	4.02686
466.1958@4.028318	53420	33324	1	1	1	1	138492	1	63391	46215	105434	88570	85578	1	87077	107916	112324	32789	56110	1	1	1	37978	1	57472	1	50838	61081	1	27809	1	59433	1	37024	47285	1	54327	(234.11838, 15708.334)(234.61964, 4545.0503)(467.20813, 21384.97)(468.21048, 5735.346)	4.02832
648.217@4.066861	58609	50480	58351	48274	26427	44690	80663	1	113157	116391	147826	140582	167311	112047	116480	174586	143294	126620	116346	79468	110920	110952	95703	106784	81103	108333	101449	80888	84850	109097	92136	87890	157167	145756	131869	118539	97167	(649.2244, 30424.629)(650.22754, 10455.813)(651.2326, 3710.3186)	4.06686
154.0262@4.0546575	459775	1	282760	406112	342638	388795	293569	412610	361327	351955	471087	375116	336621	399388	378593	311521	366911	342369	365625	273123	348791	342208	409463	342606	402130	293066	390870	381376	253677	1	368293	386127	369660	330995	259478	345103	344535	(309.05975, 11433.554)(155.03345, 91059.75)(156.03693, 7484.1484)(137.02324, 11761.992)	4.05466
772.1918@4.0694723	51172	49938	58771	65566	31906	37572	49894	36652	48034	28280	47437	29810	27475	26788	34675	31206	32912	37346	45455	43220	32708	25261	41113	19663	28743	50728	58700	36721	32575	40174	26893	1	26627	50949	36504	40405	24385	(773.2002, 11508.533)(774.20374, 4223.65)	4.06947
413.1262@4.069889	68056	65494	286473	1	1	76614	1	1	1	116935	98412	1	1	77884	64747	57728	1	113489	86835	73953	127044	78878	97777	93138	48292	93317	1	75002	78433	151117	58383	86073	80030	121310	1	113903	79622	(414.13336, 21758.78)(415.13785, 4772.1846)(416.12802, 3778.6816)	4.06989
454.1455@4.0750833	250726	219019	203902	233186	219325	220891	262046	227100	173264	210447	237567	232844	115477	231363	186472	178182	188352	200383	210379	158673	152630	100636	195093	197843	116031	161963	157395	203799	1	123230	234628	136740	154318	169180	205685	162123	160665	(455.15262, 39104.906)(456.15533, 8691.473)(457.14645, 3542.1611)	4.07508
269.2104@4.0710545	521664	537931	550245	520179	555882	530157	540201	553987	551790	530134	514131	541661	510535	534527	556988	540837	550888	535506	527118	555780	541990	544482	528346	556978	551612	565158	549256	565119	558656	556733	564481	557311	559208	634344	561664	542625	560056	(270.21768, 139236.52)(271.22037, 21759.143)(272.223, 2665.53)	4.07105
449.19@4.083595	267201	192823	212615	246114	184624	217440	270257	211522	155605	205143	258225	231486	196126	222909	183248	183676	203410	208634	252955	156393	157655	215450	202982	189038	200684	170884	157526	196672	132759	126392	260171	144267	177757	192023	205343	177344	165558	(450.19705, 43604.74)(451.20032, 9564.3125)(452.2013, 2978.86)	4.08359
162.0526@4.0942063	511414	343808	388580	451096	300802	391146	516899	402634	242954	377875	506092	449546	367706	413079	329718	312837	347578	390966	478159	1	1	376731	359944	47707	354070	301315	290926	371744	1	248190	439400	230820	311706	378431	386081	296289	275818	(325.1129, 38676.68)(326.11664, 5773.8486)(163.0596, 12366.351)(145.04988, 9463.304)	4.09421
662.2326@4.119781	179275	154720	129917	142079	80870	167047	202268	1	1	387310	314164	355141	458456	281171	374617	594085	424004	286161	1	274814	356606	291306	245555	1	213588	330719	344400	233211	1	215669	118879	180483	224759	266405	249248	241610	181979	(663.24036, 64398.363)(664.24286, 20952.275)(665.24524, 5573.215)	4.11978
280.1424@4.107027	4819705	2911787	36480	4198074	3399240	3728829	2649551	2679379	4428445	2848146	3304026	2587376	2433849	1969685	2488109	1920578	2055097	2415922	4133322	2288163	2734460	2686383	2233021	2219548	1829886	2611233	2083564	2091119	1854082	1867933	1099173	1893783	1591969	2236052	1890928	1966836	1418056	(281.1494, 820129.06)(282.1523, 106596.46)(283.1611, 14824.356)	4.10703
471.1651@4.108647	28272	26854	26311	29395	1	28830	37835	23460	29383	44386	50366	64604	35765	40170	36338	50191	54774	44484	37546	23754	26647	33256	27355	29401	36852	34894	27719	25022	1	17450	29472	1	18721	25833	19519	20128	34446	(236.58923, 11036.497)(237.08882, 4498.496)(472.1673, 3785.4363)	4.10865
204.0897@4.110109	90937	83845	94098	101095	55660	76201	125421	82291	113357	139913	151691	180012	140465	110777	127366	158430	164469	132188	110195	102222	111063	107974	104062	118912	108982	124365	118196	107384	74627	80665	116858	93583	85248	99591	92805	90162	85749	(205.09682, 31893.656)(206.09927, 5402.9043)	4.11011
505.2076@4.1107836	3108871	3257996	3229143	3599391	2194726	3060771	4623470	3182518	3995660	5382861	6016628	6255988	5404712	4346497	4418512	5346668	5732733	5042419	4351963	3743005	3770227	4108047	4308044	4283005	4438348	4107192	4198712	4013463	2970565	3336243	4735250	3676378	3587622	4209495	3539185	3464800	3315241	(1011.4185, 6791.741)(1012.4212, 5217.0454)(253.60992, 21144.646)(254.11014, 6988.505)(506.21484, 1091266.1)(507.21808, 252214.45)(508.21942, 44447.227)(509.22128, 6766.106)(528.1924, 3457.5134)	4.11078
418.1131@4.132973	136700	122892	74885	149843	78034	96579	76689	119823	104772	127363	158242	124393	140456	230776	123401	149402	181629	144119	187871	237163	203726	153197	214465	164612	126269	234905	189134	253566	213381	195180	249846	276435	247693	295460	249280	157284	216031	(419.1204, 25415.93)(420.12488, 5538.566)(441.10168, 21551.63)(442.10577, 4757.0557)	4.13297
678.227@4.1445293	1	1	1	1	1	1	1	1	24814	35167	42763	39474	36559	26248	1	41287	40969	30692	1	1	24472	25028	1	24106	1	1	28303	1	1	24324	23346	1	25928	27945	1	1	1	(679.2346, 10666.477)(680.23755, 3788.982)	4.14453
400.1621@4.154278	59669	48996	34626	51225	1	50109	50077	53351	71835	78034	76531	76980	82266	75355	78284	64567	65016	82217	66760	64266	66124	55984	82215	58734	54923	63295	54438	63904	43137	46884	57233	77116	59501	49406	37788	54075	47831	(401.1691, 21284.848)(402.1722, 5165.5234)	4.15428
468.1754@4.1564064	309223	266164	234352	235725	159353	268729	313349	216949	255077	491247	572201	604976	494281	550453	366586	487076	617553	516782	377612	286297	353041	339587	484746	328434	318123	396344	321876	378260	235386	310804	479523	436107	458430	270013	206043	245096	263778	(469.18274, 119487.945)(470.1854, 26688.268)(471.18127, 5822.401)	4.15641
460.1586@4.0657187	89867	1	1	29586	87259	1	105453	1	249088	26942	1	109736	102721	106850	92426	175334	265394	29362	361956	169190	284506	85102	393321	38367	229554	191962	73704	102764	348841	297316	430077	344767	334351	487896	362256	243377	117877	(943.30457, 6918.191)(944.3078, 4128.044)(461.16614, 6327.218)(462.17114, 2954.52)(443.1554, 32288.139)(444.15927, 7514.8315)(445.15698, 3467.95)(499.12598, 3437.2212)(478.19244, 25132.635)(479.19727, 6438.0664)(483.14893, 15260.093)(484.15414, 4890.375)	4.06572
406.1269@4.1484585	1	1	1	1	1	1	1	1	1	78103	73448	39498	73772	1	70073	1	72971	33805	1	65807	71598	49760	94279	107433	86760	70408	55352	63786	28284	94477	122087	1	157076	148442	82364	113031	53434	(407.13382, 16778.443)(408.13773, 4095.7256)(389.12503, 7603.5645)(390.12817, 2750.665)	4.14846
471.1654@4.1692734	56558	52588	41166	49584	1	54275	63485	3630084	59055	110062	83504	137490	73663	63844	74410	86141	127813	75831	73788	52876	58485	60125	54360	46378	66208	52601	56631	53754	1	27704	45397	39121	1	40462	35072	37522	1	(943.3342, 4839.35)(236.58984, 32856.184)(237.08739, 9664.284)(237.5928, 30580.11)(238.0932, 4389.04)(472.17307, 31702.371)(473.17416, 13155.807)(474.17474, 14306.684)(475.1802, 4385.27)	4.16927
390.1044@4.167108	153460	205375	187896	186856	201943	200991	211426	175220	106523	102787	111099	113636	105782	109433	98454	173847	110617	100013	98297	90082	117167	100969	69429	95768	99185	77104	122728	108869	62492	67674	72489	56483	70117	81452	66375	69046	90815	(391.11182, 33010.934)(392.11566, 6167.6904)	4.16711
667.2587@4.173871	103498	37314	129097	106046	53706	100470	61587	94268	1	32275	44774	1	31652	1	1	27022	1	47989	76586	64115	59843	70142	38622	50190	44481	102814	83018	36209	117042	45026	1	23069	35292	237890	158383	67723	26086	(668.2662, 23945.455)(669.26917, 8300.355)(670.2716, 5672.11)	4.17387
772.2058@4.18375	99383	75784	85450	72963	38016	69398	57813	74054	1	59514	56229	45801	52096	41469	41326	64072	46196	41429	101448	55330	70015	58886	51980	57997	46611	76553	74440	61239	68231	66363	58200	50160	75194	82833	99303	84573	74010	(773.21326, 18992.404)(774.2171, 7052.8135)	4.18375
505.1724@4.188355	160576	84965	66317	100662	86245	101633	92070	69204	76364	58006	79692	77888	49976	37857	50883	40631	54700	57242	84162	44131	47021	56004	32889	41252	41760	38799	45634	38880	1	1	1	1	1	40162	37224	32005	1	(253.59384, 20964.408)(254.0958, 5893.6685)(506.185, 24025.74)(507.1877, 6043.28)	4.18835
264.1478@4.2143517	9930998	8878328	7816505	12020530	6919592	7044949	10045064	8557349	7230732	10632790	11321818	10363061	9830234	8843586	9123625	12154541	10924403	7081230	8442239	7585309	7099883	6785112	8085951	6296679	5968170	8698514	9421839	6939894	5366144	5284042	5951524	7419703	6644402	5823782	3879710	5415739	5668901	(529.3025, 132814.36)(530.30493, 39047.805)(531.3072, 7371.571)(551.2832, 5961.338)(133.0806, 55981.77)(133.58223, 9450.255)(265.15488, 2302799.8)(266.1578, 327192.97)(267.1595, 33619.92)(268.16122, 1151.9985)(287.135, 2794.665)	4.21435
176.0465@4.2139454	232537	166469	183062	293791	156213	174649	182604	233652	191057	293975	221943	249697	259044	166769	227456	310686	259661	168519	218568	179169	181747	178138	195966	123045	134347	232218	223905	156521	135097	128957	113070	187370	123088	128261	85883	137670	142888	(177.05376, 73161.27)(178.05762, 7965.5103)	4.21395
533.2013@4.254216	76293	77176	52596	83610	46824	73281	103875	70353	115690	128854	125543	143949	153066	97589	132028	145938	160685	110802	122122	85157	83576	90674	83754	83759	79672	89996	88485	79220	62106	52088	81692	84461	52078	79141	69641	61847	67742	(534.2084, 26334.69)(535.21045, 7952.1455)	4.25422
633.2181@4.256378	640114	679417	610790	672658	428138	707310	857384	704332	629993	905521	1145261	1279855	803040	579983	708886	1158321	894184	944124	841861	593021	697779	826942	474135	598699	632209	692250	905441	578339	328427	356939	517482	327811	410721	590440	514486	530595	432688	(317.6167, 81890.21)(318.11884, 27206.129)(318.61954, 6847.4653)(634.22534, 145451.95)(635.22766, 43865.176)(636.2298, 10149.025)(637.2342, 2933.21)	4.25638
590.209@4.2835	1	22351	1	30410	1	1	1	1	27148	35459	34419	32324	36657	27820	29095	36391	38763	35070	38210	24602	32069	29028	1	1	20689	31281	1	23806	1	1	18333	1	1	29875	1	1	23513	(591.2166, 8544.321)(592.21655, 3467.6064)	4.2835
578.221@4.30995	1	1	1	1	1	1	1	1	1	47941	42770	22311	1	1	1	1	36966	1	107482	96818	1	78640	105307	77791	64831	102303	81744	84037	108185	1	33229	56638	1	132040	113511	97469	79073	(579.2283, 4056.6118)(596.25494, 13228.871)(597.2568, 4603.8594)(601.2103, 10499.931)(602.2127, 3783.5068)	4.30995
449.1668@4.3136215	78340	88673	116947	93666	79371	76337	92034	59637	61640	65536	87677	54499	68651	68591	85959	114445	91191	52976	75996	70971	69717	51446	50720	54826	62116	62364	86302	60847	64436	76875	55133	55203	63475	82968	77629	61851	58368	(450.17392, 20836.963)(451.1771, 5099.477)(452.15866, 3037.0369)	4.31362
265.1355@4.305192	80067	64917	96748	87802	384416	58287	80093	1	1	69703	94487	59477	65226	57915	70214	118185	89111	48659	84166	60111	57479	1	1	1	1	66047	74607	51583	1	65233	1	1	57185	75608	60585	1	1	(266.1433, 26422.707)(267.14282, 4200.558)	4.30519
128.0486@4.2534347	25602	1	1	1	1	1	1	110073	58618	92587	25270	1	1	58660	1	1	1	93851	140733	76345	1	1	104198	135159	70004	150004	1	27305	105859	102023	100425	107736	36067	99958	78402	92278	62134	(257.1018, 5033.33)(279.08704, 8328.044)(129.05495, 11763.383)(130.06519, 3492.9849)(111.0439, 12248.35)	4.25343
460.1587@4.18968	1	1	1	1	1	1	1	66786	204782	503110	1	101551	400987	101666	236341	1	1	312323	1	1	136343	170941	698747	480567	538800	291984	326723	461727	164828	617600	740712	403602	806524	310864	51944	244070	219998	(943.3047, 5189.954)(461.16547, 12817.043)(462.16858, 4325.732)(443.15536, 50145.004)(444.15814, 11395.771)(445.15945, 3461.0444)(478.19247, 32218.4)(479.1977, 8990.809)(480.18854, 3309.9077)(483.14813, 16927.762)(484.15497, 4386.8013)(485.13602, 3266.0234)	4.18968
505.2065@4.3325405	109928	104266	87361	135078	65162	103637	146289	101611	152576	177999	244117	224523	217314	175373	174247	198312	227541	174192	184349	135958	145126	174236	187680	156541	168199	152576	129912	156384	92873	111516	177772	148758	126418	172276	130545	127881	114203	(506.21332, 37253.34)(507.21448, 11063.159)(508.20508, 3556.2205)	4.33254
794.2753@4.345513	154744	130974	137983	191496	97470	190506	203106	165481	156101	218428	229527	219526	172673	114101	204447	156902	239085	180532	284367	201499	171860	160913	132487	201191	208385	189414	195112	173633	120694	111423	96839	96381	132852	276496	233523	148634	136742	(795.2823, 51794.324)(796.28516, 19734.172)(797.2869, 5819.102)	4.34551
858.2074@4.357484	35640	30645	29054	30707	1	24697	24264	30869	28065	38718	23118	1	1	1	1	27373	25267	1	54436	33350	36134	32572	27944	27558	25805	53757	53504	33537	46916	41159	37070	32680	50095	57337	49077	49975	46553	(859.21423, 11309.548)(860.21796, 4557.821)	4.35748
476.1533@4.3589163	181688	131831	160362	159451	88889	173653	165701	152460	151095	203340	204822	207541	205392	256217	176021	203152	220254	217554	211557	178330	43140	190439	198735	174406	1	223411	172684	189602	158667	136376	224703	181390	190199	210442	157819	148524	142126	(477.16064, 7312.4966)(515.1182, 3316.2646)(494.18738, 9175.23)(495.19443, 3230.9023)(499.14285, 41525.316)(500.14648, 8952.138)(501.1562, 3230.53)	4.35892
626.1485@4.3662763	41463	1	24393	64345	1	1	45738	55140	1	41165	43096	35565	31919	24558	31767	36895	34481	28604	52599	59384	48359	45285	56719	37989	27397	60219	41525	50484	52591	1	1	1	37998	46765	1	26838	33103	(627.15576, 12881.079)(628.1609, 4097.9434)	4.36628
680.2426@4.3688912	124646	68973	61727	101468	93897	102028	116087	71458	192047	142853	119150	138453	99103	56188	144093	40772	132740	102046	178606	102344	74779	97607	144942	111626	87109	102171	82986	100550	80633	76289	74451	86476	99883	82301	78416	89984	55066	(681.2502, 32287.02)(682.25323, 10938.328)(683.2556, 3847.7869)	4.36889
326.1931@4.3710003	88754	21873	56888	74177	47298	26143	52036	45890	86129	77117	83489	63334	64349	67771	67106	62533	101310	73443	1	71559	71444	83484	76457	55575	69221	91785	74546	57229	19319	81603	93278	153770	110277	78023	65443	60570	87132	(327.1993, 6123.519)(344.22763, 14811.212)(345.22855, 3460.7002)(349.18207, 8701.777)	4.371
450.1162@4.400375	48641	1	41934	41375	1	1	42291	1	32814	49186	40769	1	34542	1	33943	37593	1	1	45608	43720	35420	34373	38299	32663	1	60715	47047	42160	35876	1	1	30519	41684	40008	1	1	38163	(451.12354, 14194.272)(452.12814, 3480.7803)(453.13702, 3918.575)	4.40038
279.1101@4.4104323	200513	206879	253775	229666	131245	162379	254171	144778	138561	180142	248595	146770	170290	141551	156230	269011	215097	133971	187578	127727	131815	120145	119890	111839	114850	159080	179345	114617	104691	148621	113223	128186	140160	149423	120041	124117	99821	(280.1171, 56679.484)(281.12463, 7943.8447)	4.41043
441.1636@4.400513	211111	191403	255823	224976	129482	155634	238580	139520	130678	170101	58280	95802	161107	139136	90361	237391	75607	129388	185949	137794	139651	109515	121660	106701	126653	150391	191884	119969	116149	150020	119605	121851	144474	35987	127255	123487	93014	(221.5843, 12452.964)(222.09016, 5617.893)(442.16925, 10814.854)(443.1689, 3375.6587)(444.1531, 3086.36)(480.12793, 7376.319)(459.19586, 4257.093)(464.153, 38134.727)(465.15652, 8566.635)(466.15613, 3204.7998)	4.40051
565.2019@4.3931513	40461	38738	40244	49338	1	1	58207	40185	34430	41551	42246	40390	35972	45054	35893	37726	38238	39701	44268	44950	1	40927	42021	39516	39672	41846	38413	46878	47711	38624	57837	79900	50647	53223	1	49722	39988	(566.21106, 12718.324)(567.21387, 3716.7898)	4.39315
701.2788@4.4268284	1	21177	20366	1	1	26478	25959	22438	21623	24587	28250	24564	1	22546	1	26829	24913	1	26315	21918	25636	22477	28864	28061	24440	24273	1	1	24638	20896	25703	23566	23244	27628	23361	22881	22301	(702.28595, 8921.997)(703.28864, 3727.9053)	4.42683
535.215@4.4225006	49101	63792	53144	72727	1	46608	87827	47509	55487	77264	91070	75192	66943	41585	45333	81940	72637	69535	75599	66997	70389	77169	76738	64158	63636	62932	59869	68188	40711	52370	68547	47435	58072	76125	61269	62101	61195	(536.2222, 16741.793)(537.22614, 4972.613)	4.4225
168.0391@4.410657	382936	363540	326627	332042	294440	231659	436077	298196	338222	449379	364866	385686	1	228921	300009	317216	307498	261910	334044	216964	213226	291437	203087	308112	222931	258992	261607	1	217763	193923	345052	248315	214401	212840	200987	191517	211467	(169.04617, 82075.23)(170.04971, 5804.0894)	4.41066
471.1654@4.446243	4328856	392523	3431940	4110599	2457736	4002866	4633245	382921	4344772	5266650	446476	124253	4922128	4156002	4872681	561704	6139063	5047884	5184427	3849726	4032263	378340	3722655	3825660	4148387	4048795	4135377	3657033	1909107	2197353	184885	2413935	2497452	2922066	2538310	2675743	2719123	(943.3346, 5968.2686)(944.3394, 4794.49)(236.58966, 580625.2)(237.09166, 136877.45)(237.59229, 29530.51)(238.0928, 5377.1733)(472.1724, 599557.56)(473.1753, 127391.984)(474.17706, 23128.555)(475.17972, 4270.126)	4.44624
887.3326@4.447189	94162	85547	95671	102168	51851	77354	113891	91552	134310	159851	166825	164131	121578	122047	117641	174836	165418	135309	175191	117442	113098	119370	121425	126508	121404	143024	117859	104919	54771	61328	96803	79855	79902	96115	79308	89502	88948	(444.67166, 36388.348)(445.17172, 18213.744)(445.67285, 5851.4897)	4.44719
460.1479@4.470473	62145	72075	54658	67834	50801	67729	110098	26031	68025	68876	78043	97484	83094	87169	66838	66387	81907	73715	77567	51630	61761	66559	58262	73941	62917	58412	47057	58922	1	128165	73671	69857	47454	44816	44554	45787	65559	(461.1561, 23064.04)(462.16055, 6251.9595)(463.16626, 2985.675)(443.15427, 18888.36)(444.1574, 5729.89)	4.47047
128.0473@4.461424	83627	123531	110997	109289	76339	101690	113155	1	135373	145463	144463	78356	119795	124618	139413	162642	146722	98154	1	168552	155107	157026	150446	1	152194	44529	154805	125978	1	122477	165757	155417	133545	171386	109261	163432	128917	(257.10156, 5286.1177)(279.0883, 5088.61)(129.05458, 35001.83)(130.06078, 3583.203)(111.044, 11649.444)	4.46142
2134.763@4.458321	1	1	1	13530	1	1	1	1	32918	31338	40010	1	32393	34021	27889	35207	33358	26400	48798	40568	30590	34380	49606	47875	26733	44099	29400	33505	1	30919	42591	33879	34819	44179	38574	36974	44068	(1068.3895, 8818.046)(1068.8905, 8565.312)(1069.3911, 6421.372)(1069.8918, 4024.2969)	4.45832
1718.5962@4.4568434	1	15886	13308	1	1	1	24770	1	31659	28928	31573	22053	30109	30952	24358	32269	31568	24020	38601	35783	28991	32604	37064	35551	27000	35096	27899	29307	23611	27648	32963	32355	30783	36536	31157	30778	33193	(860.3055, 7951.175)(860.80707, 6429.607)(861.30725, 4590.7275)	4.45684
1302.4268@4.457486	36185	43666	38846	45913	21259	30372	47394	44348	58365	57782	64520	52563	58863	61303	53549	66292	62887	49391	72738	68925	56008	62416	78295	73054	58457	67710	57766	65859	49373	56618	59753	59623	61660	69929	60074	62352	64729	(652.2218, 14181.653)(652.72675, 9533.372)(653.22833, 6185.305)(653.728, 3228.6533)	4.45749
272.0898@4.460321	73518	82254	1	1	52081	68043	1	1	87085	97469	117279	1	99766	1	1	1	105512	88563	114147	109738	92188	101873	116512	63178	97519	1	100238	103637	84798	99060	105808	103448	111467	116032	105062	63165	61872	(273.0968, 21732.75)(274.10025, 3285.5017)(255.08693, 16107.361)(256.0889, 2760.56)	4.46032
443.1302@4.444208	1	1	1	1	1	1	1	47997	64143	60727	58145	1	58385	60164	1	59998	1	51513	70044	1	55746	58691	70007	67070	1	72467	60902	1	51304	61762	66939	66769	57803	65949	55536	61130	66218	(887.2625, 3860.2332)(444.1382, 19975.812)	4.44421
416.169@4.4593244	973465	1155924	1065223	1180353	941322	1001665	1215338	1028390	1269424	1239101	1371563	1177692	1362563	1398645	1271380	1414969	1418778	1225279	1538716	1550853	1425268	1433173	1591932	1486553	1443078	1472897	1385156	1482770	1388684	1398777	1563850	1501807	1554939	1680745	1518567	1509989	1558322	(855.3258, 29899.996)(856.3287, 12166.54)(857.32294, 4973.9473)(417.17584, 64716.36)(418.17905, 13517.188)(419.16675, 5629.898)(399.1643, 6460.485)(434.20303, 195012.25)(435.20523, 38653.402)(439.1584, 107015.445)(440.1612, 21752.172)(441.1489, 7634.8267)	4.45932
454.1491@4.462834	1	1	1	32161	1	1	37074	1	1	1	47749	1	43144	1	1	43102	41828	1	48381	45533	42702	1	55963	43609	43244	44366	43235	46841	39826	38509	37846	47283	54568	53346	47115	49894	49440	(455.15466, 16136.024)(456.15945, 3596.9714)	4.46283
662.2323@4.4778914	71990	51993	59487	76346	46672	66474	90678	59411	146933	171724	138123	145982	146484	77058	163761	78190	183950	132031	174912	147032	112050	118310	224084	147089	136542	174421	115609	144016	105896	95835	24156	21312	143875	137862	108398	132028	89711	(663.2399, 38598.44)(664.2428, 12932.728)(665.2447, 4372.5933)	4.47789
772.208@4.484108	310714	245940	286844	300769	191620	224500	320476	220303	409775	490518	443043	396610	484924	228714	436389	508426	453276	347476	641222	638892	528959	502964	596147	494803	455620	686912	764960	594663	650233	615276	511432	519907	681148	718453	587274	658752	570558	(773.2149, 147776.84)(774.2175, 48402.227)(775.2197, 13386.753)(776.2225, 3798.7207)(795.20087, 4595.593)	4.48411
701.2799@4.484199	24075	1	1	23431	1	1	1	1	26328	33842	39394	30259	30459	27819	26155	31782	34621	24390	32989	24686	32595	25740	34249	26926	28171	29338	28274	28037	24183	23852	27609	29556	28888	32355	24204	25611	1	(702.2869, 10648.296)(703.2893, 4420.8105)	4.4842
610.1552@4.4932	1	1	1	1	1	1	1	11611134	10876491	33671	26971	1	26405	1	1	1	23470	1	37803	37739	30550	28517	32180	29355	25382	43725	46355	32054	42146	35291	28890	34166	39602	40731	32436	40507	33916	(1243.2954, 10051.975)(1244.2965, 6181.425)(1245.3007, 2676.14)(611.1623, 254045.86)(612.1665, 57929.87)(613.1683, 181352.78)(614.1695, 28672.21)(615.1721, 1668.265)(633.1435, 30523.2)(634.14685, 9928.01)(635.1304, 4869.0146)	4.4932
808.2909@4.4863787	149398	132396	136971	176383	99414	167052	199965	149127	163944	231477	265359	261531	200804	154999	238390	192870	328060	194388	242628	188730	175366	163350	119238	182335	183334	177707	192401	162048	123412	122225	161350	104786	104549	210744	168904	138865	138726	(809.2979, 54062.86)(810.3006, 21350.994)(811.3012, 14100.952)(812.3029, 5587.692)	4.48638
616.2276@4.4875402	73990	50361	40006	67501	51174	52945	74878	61206	201326	182501	147677	169527	201680	132959	253694	129752	201409	127883	178749	137666	132752	120941	186515	136423	127470	184124	131144	134991	71225	94403	94432	156178	121657	94612	81872	112055	82066	(617.23474, 45771.33)(618.2374, 14902.669)(619.2378, 4930.2563)	4.48754
572.1252@4.332162	42913	42882	40794	52109	121935	202971	64851	50464	37730	66040	76334	76004	54109	64717	39668	36720	38845	64139	47745	30793	31637	40657	52224	43562	191818	37882	45334	44742	68718	115240	55294	47772	34227	159719	147518	114391	157943	(573.14307, 23837.324)(574.14557, 6475.8267)(575.16595, 4735.9062)	4.33216
565.2628@4.502405	76655	76056	68880	72660	47751	58080	89667	55585	50517	58412	76549	68402	58343	50586	49604	90030	70408	48831	56908	47766	54629	49005	58271	46134	47191	53840	72097	53046	38281	63592	50216	56384	57262	48885	40940	50249	41144	(566.27045, 20976.072)(567.273, 6553.1147)	4.50241
633.2203@4.511286	584394	283066	644390	558853	336745	544399	373940	543143	31219	53394	61791	34766	35616	1	26371	249155	16202	60153	514294	91491	374634	399230	40990	54499	51108	577498	529592	52282	340839	44789	1	28877	32946	595689	462094	276913	27002	(317.61697, 29830.156)(318.118, 10659.525)(634.2272, 104125.18)(635.22906, 30130.148)(636.23175, 7112.5283)	4.51129
428.1586@4.3971715	32707	17774	21250	37474	1	30341	30795	24652	38562	54246	59544	57029	49978	41680	53415	60453	58563	45190	53488	38017	37966	43180	41109	36188	34936	54123	36686	37970	11758	19824	34878	21263	27969	39519	1	35876	16408	(429.16357, 14864.017)(430.16895, 4564.1553)(451.1346, 5018.86)	4.39717
471.1654@4.5051947	417032	3877891	289544	422996	245649	386285	404488	1	369960	391037	5865840	423265	398915	311451	386198	5922007	386445	386654	453415	369647	385780	4237918	327486	327303	319638	363114	380483	345100	191414	194167	2982738	209991	200699	289862	253725	258170	229433	(943.3335, 7873.967)(944.33716, 4095.115)(236.58998, 158131.98)(237.09277, 39214.984)(237.59229, 32343.26)(238.09225, 6263.8955)(472.1723, 177504.61)(473.17502, 40205.18)(474.17725, 9581.544)(475.18008, 4211.49)	4.50519
734.2535@4.5749993	78716	24209	51579	73444	54651	19449	31350	72451	1	29510	36091	32428	28652	28448	17416	40574	41936	1	32754	22138	28389	25764	1	21368	25554	26248	22580	1	32401	34596	34108	29040	36276	48479	35803	49863	1	(735.2484, 12533.183)(736.2504, 5133.0146)	4.575
612.2528@4.5234685	28924	32464	27429	35961	1	30964	45255	33005	25755	38490	52367	54711	44711	38493	31816	40196	40873	44336	39570	27084	29806	39106	27837	33895	29118	31767	29748	32836	1	1	30164	1	1	36908	30614	27893	26868	(613.25964, 13964.954)(614.26276, 4667.116)	4.52347
531.1851@4.526595	52817	55104	45105	57191	34020	52860	75008	49591	60701	65461	87046	81593	87287	56443	62035	97609	83416	68378	75251	54155	55966	61962	45457	52017	58660	57926	42971	46393	39769	34058	50705	36097	40318	59087	49755	43294	56078	(532.1924, 20188.361)(533.1955, 5861.6377)	4.5266
635.2699@4.539971	30937	28268	31495	38643	1	31701	37464	30930	44424	47380	47204	36901	45568	27345	45503	67207	56634	29934	58466	47039	49766	46048	40390	41379	39316	46764	50448	36812	29933	31187	1	1	26897	50403	47784	33273	30971	(318.6417, 14777.86)(319.14383, 5390.7856)	4.53997
500.1795@4.544973	52614	41357	41031	49593	30735	46742	66868	43707	116610	143973	113574	144378	129593	76950	167372	82182	177677	112768	125354	98577	76093	87004	157099	106749	100823	121859	87836	100052	66180	77064	99495	100649	111657	77985	66260	91412	68009	(501.18677, 34861.2)(502.18976, 9729.462)(503.19095, 3457.0266)	4.54497
646.2395@4.5454054	2806404	2301391	2265810	2794359	1833557	2591645	3538974	2376850	5446864	6352787	5209339	6403452	5887112	3774514	7244232	3590335	7733002	5022841	5762730	4685630	3695165	4246507	7096056	5219384	4753394	5610250	4454084	4861737	3356207	3772583	4712441	4931578	5218531	4046011	3437867	4327615	3376906	(1293.4808, 6306.5117)(1294.485, 5115.3364)(1295.4858, 3593.18)(647.2464, 1414756.0)(648.25006, 475448.06)(649.2515, 97061.45)(650.2531, 16678.268)(651.25415, 3467.9177)	4.54541
297.0844@4.536722	180253	123008	105360	101349	73855	135138	126811	151259	89732	78615	55740	82760	101557	85611	124822	107557	91484	182720	96691	88530	66299	80587	107482	99211	67306	89810	94103	84391	83010	99312	115056	74213	120557	93342	54267	82361	1	(298.09274, 30051.43)(299.09656, 4821.067)	4.53672
508.2128@4.55219	116429	152186	133861	164731	93301	138588	164321	133460	111469	127823	182210	150869	126364	154961	136223	152471	157380	148847	180370	150351	148305	151925	118698	160775	193962	149370	146033	173263	150693	137223	192049	109718	125941	198618	185217	128074	167971	(509.22012, 44783.52)(510.2228, 9882.399)(511.22305, 3083.548)	4.55219
143.0734@4.540576	278637	686885	211096	1058163	621023	209300	1355256	1665243	231188	1071556	446041	1	1293924	1269679	958942	1	956144	569911	720478	1720603	1075572	1138696	1317701	1434874	1064846	1766722	857222	1868110	758639	207214	1	1	1065745	852144	264778	503687	988726	(144.08047, 308284.22)(145.08194, 30984.205)(146.08311, 3753.5344)	4.54058
368.1106@4.5633717	63540	58352	57138	54621	1	1	61063	60208	43933	73425	63654	51075	74589	98086	58458	37017	53449	184496	56158	38199	79127	72744	100117	68071	68130	50084	51782	69057	115020	179671	153977	88569	192685	156140	67433	148879	94917	(737.2343, 5487.91)(369.11795, 26854.385)(370.1197, 5946.223)(371.12387, 2817.2002)	4.56337
357.133@4.5721626	876867	608332	733302	537863	381755	839083	599289	580789	862938	803369	760769	812689	762228	801826	781938	909883	830755	713273	822703	750737	810653	797521	878361	740973	843489	945264	921010	697153	997285	1024525	776507	939831	1177661	1198198	1057255	979402	806937	(715.2703, 4497.506)(358.13986, 310589.9)(359.1424, 57572.164)(360.14526, 8588.771)	4.57216
224.0676@4.5546393	90193	141126	170828	83747	108973	130224	137756	198927	108454	71148	58181	28793	115239	59685	150648	1	16094	832545	95396	141697	144963	138996	155440	131695	126698	75768	114554	127861	173138	110386	80506	81308	74264	118506	127273	77981	171168	(449.1615, 3228.08)(225.07553, 35439.266)(226.07816, 4624.0107)(227.081, 3409.71)(207.0644, 28384.432)(208.06761, 4910.665)(242.11, 3405.38)	4.55464
570.1566@4.4348106	61444	70386	46482	77900	86620	48476	85565	55422	43816	56032	45905	51789	42826	54434	59210	60682	34126	52362	43988	75688	74313	52320	45741	69481	59096	69352	66299	60337	45837	57694	68983	53979	64497	49066	47491	61372	76599	(571.16425, 16679.594)(572.1701, 5202.0713)(573.168, 2701.47)	4.43481
162.0526@4.5584054	143403	115126	154675	123261	20792	35363	118095	173256	90794	96147	84447	85994	93694	91173	126458	93280	109040	94205	150464	122755	124987	111746	138371	108243	103813	120663	30702	95244	128972	168783	112154	120985	112378	176331	107624	112354	143188	(325.1123, 22471.873)(326.1163, 3602.6611)(163.05965, 6852.3833)(145.0495, 5742.643)	4.55841
463.1744@4.591441	46857	47639	38389	19738	1	58377	1	1	102960	65573	65860	47468	47541	54128	64400	72819	63034	62228	56457	47941	97489	44525	61756	54951	56469	58326	53566	36928	89749	380260	91199	127946	105670	148360	121241	160457	82030	(464.181, 28663.344)(465.18365, 8502.499)(466.18643, 4355.773)	4.59144
370.2195@4.596486	93464	1	53497	84292	1	54222	52245	47400	89144	95595	107173	71197	69049	66387	77558	61339	129631	81349	98885	80775	35764	86101	86316	59094	75489	106207	82401	65620	51375	96995	77270	178930	128450	95689	75936	67016	97063	(371.22604, 7187.4946)(388.25378, 19768.857)(389.25623, 4285.309)(393.2088, 10916.188)(394.20953, 3504.3127)	4.59649
382.1214@4.613837	324250	319682	287134	241083	182696	282322	265181	328408	388439	368964	254602	365236	268554	429835	329748	105971	344460	273209	355182	284760	403995	305898	322282	335805	334412	201812	332940	217781	138035	302262	329970	295846	237206	280897	212011	227814	171569	(383.1284, 67869.07)(384.1313, 13691.185)(385.12918, 5621.8433)	4.61384
398.1155@4.613459	692507	677329	611173	533155	349602	686517	543745	642792	945258	907976	795601	841193	805024	1329966	720387	1286421	752841	805063	902552	630574	1076247	659249	682194	713257	706473	593599	720799	536949	339795	573474	694787	535102	544103	524353	414888	408457	406398	(399.12268, 170519.2)(400.1253, 31756.01)(401.12262, 11846.054)(402.12695, 3534.278)(421.1045, 11267.617)(422.1083, 3544.19)(423.0879, 3800.14)	4.61346
236.0617@4.6131988	210033	206616	179305	168296	98856	209078	162892	192467	277902	269532	243344	253611	256981	1	217014	381678	225086	262507	263420	186068	1	195746	198243	220578	213225	184002	210963	158397	108913	173668	205608	165089	168293	151603	123384	122341	124261	(237.069, 53538.55)(238.07166, 7129.3677)(239.06726, 3772.813)(219.06036, 3784.0703)	4.6132
581.2578@4.6179185	87589	66392	47937	93221	78439	76727	80370	52983	73288	54605	78750	80110	50002	34639	45607	31810	53920	54520	69751	34519	42519	51830	39825	37643	42382	33355	36473	34738	29228	34957	35704	30071	31909	47583	38189	36094	27381	(582.2655, 19462.455)(583.2681, 6152.0234)	4.61792
427.1843@4.646324	160697	159893	230227	197335	13446	119324	27012	116021	102035	154448	239597	115791	138064	145951	149470	336559	183798	107315	183563	127349	148197	98162	83967	106019	101196	133306	166311	106221	91683	140039	92024	82901	107035	158224	114399	104494	86719	(428.19168, 47896.867)(429.19366, 11429.815)(430.1944, 3961.1423)(450.173, 3311.03)	4.64632
646.2374@4.6289444	58387	66599	53090	81381	47570	62458	90231	61648	159466	155712	129678	167851	155673	93359	210870	93821	241045	129875	138995	125764	1	116764	310259	175970	173779	197538	117344	174882	117079	95503	138237	172033	177288	138601	116954	134661	95810	(647.2444, 39643.465)(648.24744, 13382.441)(649.24915, 4200.9307)	4.62894
610.1556@4.640229	13991758	11787398	12174566	13600367	10254464	11030818	13545745	1	1	13241683	12812631	11430539	11652945	9318593	11389331	12488422	11566495	10337217	13636258	12785053	11460796	11086832	12280215	10882911	11152108	14410236	14652979	12606856	12461648	11898078	11785437	12103674	13268422	13495010	12079538	12756230	12940788	(1243.295, 10651.589)(1244.2982, 6237.4785)(1245.2992, 3038.8894)(611.16296, 3189553.2)(612.166, 881135.7)(613.1681, 191681.75)(614.1697, 30547.832)(615.1722, 2742.1428)(633.14343, 30824.807)(634.14746, 9171.506)(635.13214, 5063.7544)	4.64023
1258.2611@4.6364293	22743	17827	19804	23509	25726	17673	24283	18062	16821	15413	16308	14938	14192	11018	15918	14613	17966	14256	18740	23395	15664	18161	1	19852	18149	20995	26722	23460	23316	19378	16844	14439	20509	24881	1	22960	21749	(630.13904, 6013.588)(630.6372, 3676.8113)	4.63643
664.0746@4.6403065	68655	67025	68551	70194	70819	63038	1	68008	62038	68541	61724	58701	59579	48249	63040	57988	61750	56065	66111	63909	61974	59175	56477	64341	61391	66583	71957	68697	63711	61279	54019	58248	60134	82249	70852	66063	68657	(333.04477, 14426.52)(333.54633, 4795.483)(334.0465, 2995.676)	4.64031
1274.2295@4.6388383	138794	111551	125927	138691	133905	111506	129585	127108	117397	121781	114313	102083	102894	70360	113156	96634	115405	88408	124867	133238	93996	108629	124218	110051	110775	139934	149381	129256	136764	119710	108686	118900	125541	153710	133319	132139	142548	(638.1224, 18797.766)(638.62366, 11327.822)(639.12494, 6693.846)(639.62506, 3021.1997)(1275.2318, 6187.063)(1276.235, 3837.027)	4.63884
694.2586@4.644618	48772	24635	1	30150	1	1	33829	21108	147141	169402	119383	221005	122533	117391	179242	56089	197643	118482	87894	65436	40951	80744	152260	83788	113193	98721	61849	70728	88348	102081	138097	185649	154969	70649	57176	107406	60696	(695.26575, 36940.992)(696.26886, 12477.859)(697.27167, 4778.385)(677.2538, 3316.19)	4.64462
441.1643@4.659088	52440	52675	64212	58527	31497	43834	61595	35375	36895	48471	65087	44115	45204	37552	41798	67588	52763	37453	48022	32356	35024	30670	38925	25991	30204	38607	46635	31429	1	1	35247	33823	37118	33369	26630	30018	1	(442.17163, 15102.761)(443.1689, 4822.7334)	4.65909
386.1221@4.692933	24365	1	22349	55085	24791	26120	67719	56914	45001	38561	1	1	78019	142782	1	1	55312	89219	1	27994	35936	37993	39475	81841	31855	82585	1	29429	64727	207524	122030	42038	238356	206031	66894	68761	100958	(387.12958, 13155.971)(388.14233, 5760.97)(369.11835, 24709.24)(370.1196, 5660.661)(425.0899, 7690.71)(404.1554, 17608.86)(405.1597, 3664.55)(409.11148, 15653.743)(410.1142, 6805.67)(411.1025, 2909.43)	4.69293
632.2233@4.4573784	34699	41450	38041	45452	24487	34795	46791	31771	590562	22753	94718	25221	107905	90440	46619	42116	56599	717885	107448	710999	19548	98414	1023337	678469	18346	62975	22965	67313	64325	559769	629574	29307	679382	111358	83590	521502	453389	(633.2454, 54554.84)(634.24744, 24651.457)(635.2307, 15126.137)(636.23395, 4371.4814)	4.45738
194.0576@4.7100306	292948	121378	197501	135643	143471	149856	194593	57160	104455	85793	71950	70074	80162	75462	100251	45383	67874	120871	1	133978	100897	98509	131235	122973	83973	1	91072	164504	1	209959	1	157743	265933	101689	58750	214121	115293	(195.06465, 35345.254)(196.06805, 4796.01)(177.05405, 17695.336)(178.05704, 3414.505)	4.71003
676.2485@4.7225137	151821	111846	123408	164431	88358	141481	206608	126236	224731	334031	246804	295544	264300	138278	282124	143249	371371	259081	293812	264081	196079	229107	494963	268237	269247	276813	199978	280426	179507	186194	275763	268536	299209	236886	191809	257912	179399	(677.25586, 81728.445)(678.2584, 27456.674)(679.25916, 7186.5786)(680.2592, 2948.33)	4.72251
206.13@4.721648	94466	86583	94865	103829	73382	79618	97420	80725	106811	114201	156885	102611	141616	110665	97434	141045	116255	101961	137417	120570	127189	123475	142057	100095	105506	137580	119109	117594	112395	116747	122671	106714	127798	144754	127782	115791	130807	(207.13716, 43390.24)(208.14018, 6290.8496)(189.12645, 9004.234)	4.72165
386.1906@4.723143	130506	1	1	22934	1	1	112836	1	134262	131108	162739	94735	154179	136282	20708	191134	160322	107894	182572	176294	178773	190528	160016	147629	1	179358	198130	180274	181720	1	1	140364	39305	218871	198255	159984	1	(795.36847, 6971.311)(796.37305, 3442.1501)(387.1972, 5792.341)(425.15353, 6167.2344)(404.2221, 7874.0103)(409.1803, 41299.676)(410.18396, 8818.284)	4.72314
439.1585@4.736743	93284	37013	41023	49618	1	30746	50130	115016	89487	52871	22745	1	52296	98886	114983	53894	48576	245286	61059	49308	293081	41535	48661	104123	31381	60288	50297	65812	31724	41106	68462	42218	54625	84212	30064	71499	39638	(220.5863, 6078.7646)(440.16547, 26496.031)(441.1649, 6266.383)(442.17065, 4429.7)	4.73674
224.1405@4.7253056	70870	69313	73206	86739	1	60678	89495	64266	70674	84615	108714	74050	84066	80446	76221	99368	85497	79462	99481	88004	91596	89389	98528	76799	89580	94484	93414	85669	85110	89768	102222	80763	93784	116722	100253	81313	85840	(225.1475, 33096.297)(226.15082, 4930.524)	4.72531
287.1365@4.7285676	246832	245919	193071	291974	172792	228541	292953	212126	282321	276929	298827	220267	276075	202466	269904	320347	324349	192401	341572	310057	295868	283779	366726	279016	285794	299708	319551	303798	271511	329212	232006	334315	359722	339123	306857	285858	314555	(288.14377, 110334.33)(289.14685, 15734.498)(290.14905, 3295.0125)	4.72857
570.192@4.710628	39202	23920	1	42641	39850	26591	32790	23759	32150	56753	48206	71298	39267	1	43845	28128	63481	54066	39111	31364	25533	36614	41768	35888	53214	33804	38517	43498	26206	31421	34333	61630	46495	38432	35708	33463	34860	(571.1931, 16288.224)(572.1967, 4562.5073)	4.71063
224.0678@4.7539425	55383	1	789785	857278	37266	501949	63913	987705	45994	675811	52023	58876	1	78468	43592	60747	131655	63814	53791	733278	633977	57685	49277	53616	51686	461654	54553	633388	55651	56758	76996	682601	79859	51254	60527	49218	55267	(225.07478, 67055.58)(226.07838, 13997.959)(227.08109, 3690.4941)(207.06485, 36836.28)(208.06807, 12062.437)	4.75394
403.1474@4.866625	38437	43515	42900	35261	1	36864	39909	49541	44196	1	32700	32574	33608	38397	45504	39938	40860	45397	41263	40390	39062	32505	55064	34174	31489	30724	1	1	41555	51716	50487	32634	52870	65138	46579	34341	1	(404.14938, 17721.463)(405.1542, 3921.8357)	4.86662
454.2397@4.7685647	1	1	1	22181	1	1	1	1727441	20467	2058611	27197	1	1	21921	23929	26136	1	1	32056	25678	24977	25362	26252	1924674	1	2161955	25844	23752	1	1	27591	1	25602	35707	27847	24672	26465	(931.4694, 3942.2532)(455.24792, 88890.2)(456.25296, 91630.984)(457.2528, 19711.926)(458.24976, 3272.6)(493.2057, 9140.66)(477.22757, 24861.834)(478.2337, 26349.309)(479.22592, 7473.2773)	4.76856
842.3109@4.7637496	17968	1	1	17864	1	1	18838	1	30686	22757	28970	20566	17396	1	22987	19124	41830	22907	30071	26144	22664	22951	24739	23101	23944	17451	27154	23051	1	1	19473	18373	27028	20939	1	23101	16355	(843.3173, 9278.952)(844.3203, 4256.1562)	4.76375
226.156@4.7623067	1	1	1	53991	1	276439	49881	1	259499	342450	452010	324209	51115	1	1	367070	360178	1	59266	333733	376424	57666	312034	324337	379886	387118	306563	1	1	48381	62621	268207	354422	57350	459834	1	53602	(227.16336, 21649.377)(228.16672, 3406.149)(209.15254, 110959.1)(210.15579, 15258.875)	4.76231
410.1903@4.7593894	43450	45045	47169	63202	42105	42914	53593	43251	38924	47704	62537	44674	57685	50980	47477	60454	1	49255	55449	52950	59159	56350	47223	43353	52734	51987	49285	52738	59622	55593	58500	45276	53061	76223	71678	53406	56274	(411.19745, 18965.514)(412.20154, 4129.163)	4.75939
208.1456@4.476788	315346	355176	36649	442144	252979	30866	430731	332969	32659	40938	55920	38077	41840	421599	226128	45338	1	47124	54944	1	1	47598	14096	41690	1	46189	43058	40719	48390	41746	492140	33122	46631	591970	44162	42605	48192	(209.15294, 40650.47)(210.15596, 13732.249)(191.14232, 16408.438)(192.14516, 5781.619)	4.47679
370.1985@4.764351	52375	56397	58936	79317	40780	52553	73365	55079	52171	70468	95127	59141	69305	67679	51729	83027	73441	71768	92923	73653	79038	81324	67061	62693	78161	73529	70248	69735	66944	69621	90915	58907	73324	111628	96852	66525	70381	(371.20587, 25732.666)(372.20898, 5361.5522)(353.19424, 4485.82)	4.76435
518.1995@4.7663994	27377	23313	20656	58503	1	71896	93312	56325	109696	232569	61988	278712	1	226390	56044	63123	236436	187319	118213	97026	30075	57723	185354	133224	216857	92121	97558	82076	75250	98177	245958	226965	68411	98864	85044	46640	106169	(519.20636, 13325.721)(520.21216, 10528.936)(521.21405, 3670.077)(536.23364, 13785.811)(537.2361, 5044.4644)(541.189, 30034.215)(542.1927, 7806.3574)(543.1881, 3608.0857)	4.7664
296.0893@5.0046005	1	1	1	1	1	1	17643	1	21518	44033	29912	47673	76054	50077	73883	1	40837	71655	62398	1	11337	22193	44052	25375	37598	19025	1	30514	31103	1	45744	41072	37652	17476	1	16929	44207	(297.09625, 12693.338)(298.10013, 3909.2422)(279.08527, 6120.212)	5.0046
450.2005@4.778919	135685	159936	115032	171430	94295	126308	196430	116737	216758	189628	231122	241560	278501	205371	219692	270724	284441	208754	229752	189763	177263	182420	226817	181464	183547	195978	150775	190088	133573	153031	201921	169990	183818	176829	161590	157194	174723	(451.20767, 62519.223)(452.21008, 15333.185)(453.21066, 4193.951)	4.77892
734.2538@4.7627835	37578	25949	48785	27609	32246	37185	41173	63851	100169	166227	265708	207558	264850	105637	114451	172826	240503	235083	291864	26435	173585	201953	107332	144253	164670	229819	145171	36722	144065	45668	34954	101586	55329	208041	90678	98974	137863	(735.249, 43170.06)(736.2522, 15547.297)(737.26666, 5791.379)	4.76278
173.0472@4.776946	336878	237860	323146	298785	322793	342357	250622	295101	262706	204249	223620	208088	191949	188927	217418	185671	204845	143365	80948	259374	266622	245175	213471	242598	228235	222229	245280	225061	230109	143149	136204	149966	168947	203015	225241	172505	183931	(174.05434, 85252.766)(175.05756, 9889.318)(196.03592, 4336.5674)	4.77695
484.2417@4.8035946	185444	87255	86487	147327	116210	130775	80333	63933	97514	63496	68827	68634	48559	36307	48930	51922	55501	64366	84380	35254	49886	41814	26258	1	30737	35124	39964	31027	1	1	31685	1	1	33972	29984	26178	26417	(485.24567, 23559.162)(486.24863, 6233.5195)(487.2495, 3881.6033)	4.80359
341.205@4.785411	157908	176122	130869	188900	101115	140599	228431	145899	127291	172015	199109	191671	178790	1	141843	1	183568	193566	203742	138316	138180	166643	182057	167198	165752	178200	129314	171816	109567	126718	1	135884	158416	176955	135577	147798	156084	(342.21225, 53599.273)(343.2151, 8763.912)	4.78541
346.1606@4.7852435	440357	514873	372046	529257	360072	449975	623397	455730	410800	479844	573245	557656	523281	674422	439705	617391	551931	534697	521150	418036	425285	477934	480018	476236	498440	489072	404891	492277	315186	316875	656097	367432	423909	430366	396466	397773	424345	(347.16803, 145209.7)(348.17084, 21360.479)(349.16757, 4656.4326)	4.78524
310.1315@4.7878113	239772	155980	420671	142617	97809	155777	64257	66557	146985	153563	173997	71912	62911	77926	99299	60606	51300	151248	176114	105122	162172	113565	129467	117963	69479	140109	89045	105049	124304	305795	63383	139728	115847	197820	116104	218371	83811	(311.1388, 53739.3)(312.1412, 10873.759)(313.1429, 4956.74)	4.78781
376.1385@4.7934055	169154	138535	109135	140016	105981	132124	134564	107713	169468	157849	151325	137017	146829	134163	154697	149240	137574	126586	147411	139666	137021	117736	137200	129102	120500	140392	151888	136793	107080	157458	154157	156690	147101	141468	174872	128152	127703	(377.14572, 55718.145)(378.14795, 11347.486)	4.79341
414.2467@4.798882	94176	1	50560	92626	50883	55102	1	1	104030	124179	127967	90279	82151	81549	101999	74300	138846	98941	117208	104397	105266	96513	108108	78137	86343	120779	99465	82813	73294	137035	133357	202297	152633	121038	94322	82753	118820	(415.2532, 6925.2505)(432.28024, 21786.74)(433.28256, 4846.4634)(437.23657, 16380.417)(438.24005, 4102.569)	4.79888
508.2155@4.801343	76289	51865	181764	69798	47822	85453	1	110099	24128	45045	44323	45196	42302	35636	41867	30158	31440	48683	95513	122016	74540	134348	54681	109233	69161	94391	137885	29111	125891	60238	47602	33999	35067	123797	103697	1	32109	(509.2275, 23870.186)(510.22964, 5790.3696)(511.2212, 3206.46)	4.80134
224.0683@4.8498235	912448	801426	1	50710	570412	51317	791318	53820	518971	20025	599994	438971	628980	497204	579007	509831	552319	18915	634209	27967	1	633362	685976	600000	434813	29122	693978	23690	744164	884479	900369	1	860015	906895	441266	735511	648126	(225.07555, 128863.56)(226.0788, 19463.592)(227.08163, 3756.4033)(207.06528, 74446.41)(208.06795, 11662.571)	4.84982
794.2249@4.804081	135209	138534	116966	140753	126756	64514	114412	182814	89382	103561	66155	55939	88541	105212	94965	55948	69807	118002	78887	126217	104949	93353	96817	95879	51103	101676	108729	99663	165082	155882	130056	114859	147285	151632	65768	125202	125211	(795.23224, 40407.227)(796.23535, 14712.616)(797.2468, 4785.5737)	4.80408
408.1037@4.8331895	113835	104938	102195	121072	96605	69457	95487	137966	72436	90665	77958	66897	85499	97372	86406	68705	71916	106474	60989	95013	84383	85062	87757	78978	63021	91297	91769	88781	115861	91033	61325	92943	118222	122261	68841	100888	92799	(409.112, 29361.967)(410.11572, 5713.5444)(411.1008, 3003.7869)	4.83319
578.2261@4.8122773	41585	34978	27989	41900	1	36447	38536	36723	41953	49712	55451	47226	46047	41314	37802	49184	43844	41708	47267	37947	40941	35012	40904	32195	37835	44993	40418	36676	29352	27844	28713	37282	35847	38404	28592	31816	28224	(579.23364, 14970.099)(580.23645, 5226.398)	4.81228
487.2631@4.832029	106458	106301	107089	117801	61558	90583	118137	104279	104908	119189	130180	120818	110922	134691	115803	140670	1	128185	157014	130476	121603	121767	140545	131477	115433	1	146467	130122	105093	131157	131807	135144	110000	154211	109284	120953	120866	(488.27036, 43976.39)(489.271, 10580.175)(490.2718, 2598.85)	4.83203
492.2192@4.8328648	346564	378204	346369	379592	251592	346112	392606	363954	400992	431912	474762	414468	407592	427668	430255	523970	501819	427658	493774	434202	426808	425831	434856	450761	417292	473587	498953	422514	343535	424542	442919	426744	358306	444028	383911	387207	400206	(493.22647, 143663.94)(494.2292, 29572.402)(495.23068, 6972.4526)	4.83286
518.1992@4.8362284	32981	27137	1	51753	41890	1	81853	47654	102224	102245	152334	235795	66872	127456	78166	34140	213256	91835	86568	54032	54871	89907	92834	68462	176521	81194	100507	161673	59576	99199	255816	238697	155870	95183	84501	97058	49520	(519.2061, 14193.704)(520.2099, 4697.728)(521.2095, 11903.054)(522.2095, 4025.0203)(536.2313, 11306.297)(537.2333, 4438.702)(541.1886, 23974.006)(542.1922, 6508.5645)(543.1951, 3229.1367)	4.83623
488.1692@4.8401623	94771	74465	68423	70832	41820	86070	68231	84649	66856	79716	62868	67259	64499	81547	77134	149501	73890	90302	74450	56255	99207	52753	71066	67897	58354	65828	61713	53566	59375	64113	77778	61309	59583	71671	51869	60390	58042	(489.1762, 23888.59)(490.17926, 6800.0796)	4.84016
1886.4939@4.7884345	1	1	1	1	1	38628	1	11854	65675	60312	75814	64825	62143	31088	15368	20739	34349	12450	55656	1	28195	31856	20718	1	13966	23640	1	1	1	28112	95908	22731	26972	41919	1	1	1	(944.25305, 4404.399)(944.7509, 4679.438)(945.2454, 3244.5857)	4.78843
1909.4775@4.8539996	1	1	1	1	11799	1	1	1	61923	73115	72794	68880	70811	55850	64218	82654	83216	55810	69717	43401	55050	52742	41296	52655	45142	54703	53298	40798	20638	45967	84005	49973	40845	40134	46089	47419	14437	(955.7473, 6335.1245)(956.2472, 6346.477)	4.854
1909.8145@4.861928	1	1	1	1	1	33336	1	1	65590	78355	79290	65357	72497	51350	19900	75607	1	46414	68497	1	47545	46664	39339	53594	34896	49626	41993	43055	19268	40594	96077	45790	35849	44719	44328	39024	45051	(955.91376, 7451.1797)(956.41254, 4736.879)	4.86193
1870.159@4.8528914	770671	954853	749340	826742	540414	1161252	981359	867472	1184690	1330007	1379813	960132	1198584	993844	977437	1552744	1398796	959831	1222449	913854	1027382	961395	934923	1062837	1060837	981787	1043971	855575	240280	848466	1342096	851757	882968	737691	807211	856370	898969	(936.0865, 87333.58)(936.58606, 46705.895)(937.0858, 9767.294)(937.58215, 3166.3162)	4.85289
1869.4937@4.852838	844904	1058780	795910	906835	588490	1290835	1094213	975952	1344499	1495044	1575008	1083508	1352192	1120031	1079567	1711192	1551300	1052836	1340824	1044283	1164505	999710	1050888	1204850	1069541	1106764	1163867	922759	234688	936984	1494097	964429	979825	856104	962600	996512	1006309	(935.754, 44479.01)(936.2532, 83975.3)(936.7526, 29881.486)(937.25287, 5823.13)	4.85284
896.3735@4.7521377	1	19724	1	26941	1	18915	22264	1	32427	29720	39782	49094	54250	26730	43444	77076	14276	27873	25350	24060	26518	26343	21865	24927	24895	20362	1	20453	1	14344	14485	1	1	42543	31979	15603	23386	(449.19327, 10462.878)(449.69464, 5137.98)(450.1932, 3340.35)(897.3521, 6497.7188)(898.35114, 3551.0051)	4.75214
801.3546@4.8523827	396741	500774	388960	400726	1	586603	489660	441002	589366	691702	721717	466108	621968	500190	509019	800137	732026	504926	591591	489094	545976	171696	496921	523786	312828	498723	514043	400650	243857	415057	658701	414365	1	413100	1	466437	465342	(802.3616, 68546.93)(803.3581, 9323.136)	4.85238
801.4969@4.856767	454938	546078	437368	463831	1	666445	571497	511636	1	1	1	535711	715799	1	565993	893342	835337	535505	692870	514683	595787	595581	531683	634276	636258	535809	581087	484738	1	1	776305	493056	478277	423424	479090	513577	515267	(802.50415, 80169.62)(803.5018, 5122.1377)	4.85677
1869.8256@4.852027	835064	1073323	830398	915581	595552	1295652	1076519	934217	1320607	1463268	1520623	1081044	1303861	1105326	1114446	1698797	1552083	1069880	1338734	1026346	1143616	801850	1025933	1167909	1202327	1052838	1138734	916602	435504	904976	1484772	942899	958319	864403	919744	965011	979527	(935.9203, 73752.836)(936.41956, 67207.33)(936.9191, 17374.994)(937.41516, 3916.8674)	4.85203
801.212@4.857	282623	340178	260002	306594	187427	431633	356931	296846	429804	466016	437706	344312	422353	358091	339629	548630	511698	341539	415409	330741	368135	32086	345229	389512	1	318480	364635	315296	102127	297399	480983	298460	1	275454	308962	316177	301599	(802.21967, 39878.996)(803.2171, 15854.452)	4.857
430.185@4.8377275	73091	81608	75827	81016	33108	62406	89224	64461	72602	44097	88846	75390	68864	38363	1	101557	86066	46405	84975	72498	51150	77488	56468	1	59667	1	80221	79021	66701	89643	63138	1	45794	48350	74392	51090	77103	(431.1911, 8362.388)(432.1833, 3465.22)(448.21762, 13039.353)(449.21817, 3427.9275)(453.17657, 10440.057)(454.17923, 2734.97)	4.83773
1121.8936@4.878444	48421	1	47714	98161	34975	1	119329	64036	83075	96866	255592	1	47797	64670	174392	1	1	1	94948	58906	1	53885	125776	80639	84931	69077	182303	99024	37137	1	1	1	162067	139309	67703	46865	60010	(1122.9001, 15675.187)(1123.9003, 6289.903)	4.87844
696.1541@4.8764873	49500	40112	42844	53483	29585	35982	58084	43460	48597	64110	59407	56694	55487	43731	54186	57694	55556	51289	70277	59059	48473	51595	57240	47847	45235	76609	66805	56665	56873	47598	53833	63154	62096	70674	36028	64219	67546	(697.16156, 20373.45)(698.1655, 6642.7803)	4.87649
469.2518@4.872269	1	34442	38171	39523	1	28212	43659	32344	31350	1	1	40953	36362	41792	1	48096	1	1	49315	40979	38969	40490	41956	41188	1	44550	46820	44100	39632	32593	1	1	41264	52129	45677	41737	1	(470.25858, 16152.299)(471.25354, 4281.036)	4.87227
474.2079@4.8757567	97295	123431	110936	120557	101371	99689	128621	108783	119535	129126	139980	128057	120032	130161	123952	148173	135108	125112	129505	132907	131449	120236	132425	123221	136595	126809	153557	137983	120547	117340	150245	117691	129916	148437	147688	132838	132917	(475.21527, 45758.312)(476.21802, 11781.591)	4.87576
2042.5513@4.8767996	28259	30037	30232	39556	1	49313	41406	47334	35018	60917	63749	32608	47776	38749	31356	57475	56417	38027	78187	33458	39949	52625	29833	55900	47586	42511	32593	25801	17019	1	49584	20607	18306	31085	25271	26130	29613	(1022.28125, 8398.183)(1022.78033, 9053.698)(1023.2819, 3652.1577)	4.8768
2043.213@4.885357	23944	1	1	30903	1	39434	35557	34406	1	1	43978	27833	35755	29724	24743	45191	43208	33686	60873	28815	33952	37426	24687	1	37850	30902	25197	24057	1	1	39673	17580	1	24940	20643	18997	24655	(1022.6139, 11080.268)(1023.11383, 4819.5894)	4.88536
320.0896@4.8826537	73469	1	77223	92204	1	73081	1	81326	41624	52304	55425	53045	59193	61013	55840	65719	50867	57038	1	1	69881	70415	47565	1	70144	66761	1	60062	50854	35955	39185	1	40126	76047	1	1	1	(321.09695, 20945.252)(322.10034, 4235.1875)(303.08694, 6067.848)	4.88265
572.083@4.8851657	39490	1	46983	47528	35793	48994	43291	55680	1	30963	36510	30730	35231	32435	36503	33893	31952	37136	48008	39186	43528	47908	30290	38843	36304	39567	1	37555	1	26007	1	1	24948	42069	29453	1	35116	(287.04996, 3493.85)(573.0901, 13070.127)(574.0937, 3703.1929)	4.88517
338.1002@4.8931866	48374	74577	52371	61186	58885	51876	118176	56268	1	38680	45109	36055	44122	41251	37284	45577	43262	44670	147631	89367	46526	54471	31272	103419	43220	74548	75651	40798	13380	1	1	56468	1	51414	1	78323	86123	(339.10742, 17301.652)(340.10977, 3711.2754)(321.09695, 19166.408)(322.10037, 4494.991)	4.89319
248.0539@5.0080314	51029	29391	25127	68845	1	55941	57964	1	31423	47280	51070	90095	56415	115160	44637	51832	56073	52142	37660	1	51936	32901	40011	25168	27576	52113	1	45580	34466	1	1	29498	32654	56412	35576	37449	46872	(497.11526, 9384.35)(498.12405, 4694.0103)(249.06169, 6286.401)(231.04984, 17378.188)	5.00803
2042.8785@4.877389	29855	29583	31211	34100	1	46105	40562	39671	30223	51966	51935	33672	41353	35417	30581	53368	55331	34721	67725	31020	37373	47474	23031	47703	47488	38054	31241	24215	16766	19049	48357	22560	17960	29460	23535	25521	31439	(1022.44684, 10264.112)(1022.9463, 6644.83)	4.87739
535.1905@4.8691072	188993	147493	206305	240507	125538	209554	221861	220984	20858	37599	38878	129520	168379	47090	153675	170068	155804	35623	21408	172710	201956	23468	36411	182510	184516	192596	156713	170429	156651	115700	124441	121711	118519	221025	139329	21467	177855	(536.20605, 46842.344)(537.20886, 12005.626)(538.1975, 4424.145)	4.86911
278.0595@4.8791995	43250	31686	44549	50630	30788	44104	43373	48543	33618	36128	37433	1	33224	34940	30588	36788	39011	40361	57899	35734	43124	60374	1	51925	41715	45081	33591	38592	31958	22442	29239	27769	25058	45430	33047	30012	38775	(557.12933, 5880.803)(279.06616, 7204.783)	4.8792
540.147@4.882054	138501	115231	166983	198600	112675	164867	155328	188430	82688	106253	118232	91700	121330	123730	110502	120400	105192	137223	189698	127531	160886	174634	100378	141847	138744	136822	113343	130924	122248	81238	73452	95819	97703	162761	101290	113651	125909	(541.1549, 45404.31)(542.15894, 11302.946)(543.1657, 4131.646)	4.88205
706.295@4.8849196	91276	85349	56669	85740	68976	81709	106987	68340	93128	111753	103032	96360	93654	47625	98663	98764	113921	82607	85135	72423	66098	65901	89393	56349	73301	110963	88384	69025	52587	68050	46075	75724	78637	60006	49524	72571	47179	(707.302, 28962.145)(708.3051, 10702.525)(709.303, 3584.594)	4.88492
753.2056@4.9035	1	1	1	1	1	1	23299	1	37839	79273	52927	84559	36624	42773	42336	1	75583	53158	51869	35316	27267	47652	61985	46426	69010	34209	32425	51511	1	1	60358	58325	39021	38444	23746	1	27573	(754.21295, 13999.382)(755.2184, 5314.844)(756.2183, 3301.67)	4.9035
408.1761@4.853298	73590	112430	95693	133992	110639	84411	69847	81279	63047	67143	84238	72318	77387	70976	107873	71461	71290	66427	73994	67872	67685	70419	69392	65039	121919	65020	62357	65356	60236	93123	98239	52108	117949	80905	68016	65949	108063	(409.18216, 31133.082)(410.18515, 6722.672)	4.8533
292.1886@4.9191084	189575	183370	188209	205083	128719	164800	218243	187435	181499	216755	249966	235071	216536	266801	190969	240005	229206	225010	263803	214778	204712	217390	233835	201803	209347	233507	206193	235386	179203	171565	246783	188693	206010	258170	211956	216815	199002	(293.1959, 75341.07)(294.19913, 11183.674)	4.91911
465.1276@4.9192643	54308	48177	44743	49721	1	50397	57655	57895	37052	50505	56630	66810	49646	68006	35904	49368	55179	67473	48536	41141	39720	51025	41952	39934	51162	39697	54143	43629	1	1	62882	42912	44841	45051	37643	37927	35989	(953.244, 2944.2349)(466.13498, 19540.523)(467.13968, 4982.354)	4.91926
254.0807@4.9205275	50975	46043	53036	52198	45356	43609	54719	52643	50061	53675	59043	59543	53909	61216	55537	61269	56130	55540	59605	61498	54580	58499	65189	56246	52693	61432	59334	61285	49265	46851	53828	1	50876	66876	61470	61752	53272	(509.16833, 8046.0903)(255.08849, 7710.183)	4.92053
454.2428@4.9308176	1664505	1722923	1753367	1871386	1242286	1520111	844666	1	1728551	1	2402017	2226677	2012112	2603150	1834113	2364055	2195922	2059304	2552047	2031909	1953112	2011532	2205980	1	1991788	1	1993804	2167232	1719038	1630480	2329544	1750244	1976792	2412378	2046871	2072980	1958732	(931.4706, 4186.1885)(455.2503, 486321.16)(456.2528, 93470.9)(457.25253, 19688.072)(458.2507, 3457.2888)(493.20676, 7660.806)(477.23135, 126532.484)(478.23364, 26446.568)(479.226, 7761.864)	4.93082
146.1303@4.9199147	122786	315054	126992	128830	1	101906	138541	116963	99195	121940	148565	377093	124648	169257	102853	366071	127803	352695	148643	116634	112770	350348	363530	115126	116540	137858	110507	132759	271185	1	150209	103257	122201	145506	127617	127823	304869	(147.13762, 46552.332)(148.14076, 4159.151)(129.12733, 78446.5)(130.13058, 6835.6143)	4.91991
308.183@4.921865	373489	362428	369396	387500	289875	164634	437694	330842	296777	347654	424051	417945	390534	546615	300101	381262	359327	375368	393751	312862	317945	351147	382532	323538	344610	348467	278132	367463	275133	269807	477835	275028	362937	227886	339192	328398	323479	(639.35425, 4266.7)(309.19043, 55058.0)(310.19232, 8441.739)(347.144, 5577.3467)(326.2172, 9376.149)(331.17258, 56300.582)(332.1757, 8745.806)(333.166, 3469.51)	4.92187
512.1647@4.942	482656	327255	299798	542373	204638	456093	659537	293426	214531	370614	542151	608291	438299	327200	372819	335766	567765	549110	423263	172606	327816	377408	206387	227132	231585	298682	388791	432594	94526	149016	418054	334490	219448	295693	139824	144771	162918	(513.17194, 50950.586)(514.17596, 12445.584)(515.18066, 3794.4426)(551.1318, 3106.655)(535.1544, 36192.605)(536.16614, 9682.711)(537.1713, 2755.69)	4.942
470.2054@4.940487	81861	56917	88460	77716	46112	56072	86185	70662	63787	85791	92637	83129	68411	51406	80512	112087	201797	53678	77392	54118	50321	56339	52756	49361	43547	159580	85113	52293	51302	43109	43802	36832	50629	71297	55756	50315	47464	(941.4235, 3586.11)(471.21884, 23342.584)(472.22086, 7005.141)(509.2008, 17977.13)(510.2045, 4592.89)(488.27063, 52868.8)(489.271, 11943.05)(490.2741, 2617.88)	4.94049
397.1951@4.9459996	37314	46939	42878	54341	1	39021	62878	38984	1	50948	62430	1	52618	68672	49723	63773	58197	56592	56321	52651	48900	53357	53651	50486	58369	56463	56190	59419	43499	1	71636	50361	52730	62031	49983	1	54185	(398.20218, 21342.44)(399.20374, 4291.972)	4.946
362.1573@4.9471073	80640	101070	89670	105081	62775	76622	129263	85018	86871	108989	138701	111760	107335	135543	105231	129059	122070	124536	115626	107709	107212	112810	109681	109167	124593	112862	115633	125098	87122	96403	144590	106853	111626	125278	104272	91030	107395	(363.16443, 43056.156)(364.16748, 7815.104)	4.94711
402.1502@4.948081	92192	117699	100157	126555	77347	95232	130305	90425	90388	112509	143161	119517	121680	161470	119316	143224	132367	129909	120365	112731	117643	117092	121716	120388	144457	121089	123479	137657	97731	108214	158675	116949	121415	135911	120864	100025	116516	(403.15714, 45622.742)(404.16092, 8378.729)	4.94808
691.2687@4.9586573	33467	34451	26333	30745	1	28405	40458	27447	16813	30155	33216	21928	25143	33819	29636	32718	33202	37112	26114	24522	35935	28903	31314	26441	28157	29797	28963	28811	17453	25570	44687	25233	31659	34132	22447	22017	1	(692.2756, 13588.959)(693.2782, 4977.0923)	4.95866
569.2112@4.9744587	47963	38173	38513	36481	30948	61223	37756	43978	37849	22388	33294	30633	40944	35494	47878	45412	42340	32001	40462	35866	29867	40687	44849	40121	38330	38681	40864	34983	22240	39553	22947	37212	34920	41766	37683	45408	42792	(570.2184, 11520.356)(571.2208, 3810.2627)	4.97446
372.1212@4.966091	231058	175234	176878	161133	126513	252669	191172	204525	222188	264713	214635	1	225514	1	205777	215869	1	457901	165270	182141	251115	217966	195836	218288	151850	204946	223222	1	158805	203290	178518	189789	200555	157425	145050	176219	165732	(373.1287, 52890.312)(374.13638, 13889.557)(375.14102, 3288.9326)(355.11905, 11949.505)(356.12274, 3016.7925)	4.96609
574.1673@4.9745674	79627	72019	73076	61722	73619	104873	62157	80936	71857	66398	47161	49749	70813	64026	84302	78354	64731	49561	54303	62889	64460	67314	77829	53022	67583	64524	70529	60077	43998	74522	58828	61530	54381	59635	70144	74194	73143	(575.17474, 19245.793)(576.17804, 5874.614)	4.97457
439.2473@4.961434	68795	108365	57079	1	1	39209	479145	50273	1	39311	1	1	46981	1	61197	97446	49665	166560	278443	32847	68639	31876	57906	52507	1	51027	47652	74837	42109	25593	110827	27454	28689	44389	42817	28412	34744	(220.6306, 3011.25)(440.2542, 30448.62)(441.25006, 9254.75)(442.25842, 6710.325)	4.96143
863.2845@4.9694867	126349	85435	69085	60537	34485	124297	77823	105370	62206	82904	48210	39082	54271	56285	78145	75397	57050	57819	53655	45434	110418	58717	73053	67072	39124	67360	55061	42946	51014	54339	72870	43355	52034	49551	37480	55167	48757	(864.292, 23519.97)(865.2952, 10332.35)(866.2984, 4163.5776)	4.96949
542.1902@4.967513	86939	36030	52342	45597	41851	45295	54704	51798	81723	145743	101072	150671	87854	88164	91389	29856	124718	104326	87674	70965	49565	100383	79630	85961	89705	76360	52036	93729	44911	87198	104578	73129	116513	147326	86240	131046	43358	(543.19745, 31876.703)(544.2008, 9567.252)(545.20264, 3768.2185)	4.96751
829.2641@4.969913	60659	43892	49076	37078	19412	42519	54232	54130	19425	30200	28164	31197	27131	33350	23259	31395	19931	35599	32653	28898	36354	29276	24568	28106	18813	36767	39497	29401	20124	1	35854	1	28604	33938	22379	32205	1	(830.2714, 14150.478)(831.2749, 5647.3867)(832.2796, 3295.55)	4.96991
928.3111@4.9680367	1	1	1	1	1	1	1	1	39435	51314	48317	70457	48181	31278	52181	17358	73678	46429	34652	24673	1	25086	43381	35567	41083	34746	25783	27058	20517	24419	34374	39511	40515	35846	22962	33689	1	(929.31824, 11542.236)(930.3207, 5660.672)(931.3281, 3620.6458)	4.96804
311.1008@4.9718924	4072534	3501166	3078035	2888981	2195237	3603913	3297562	3562315	2637525	3118241	2633699	2294946	2541998	2880595	3065474	2776142	2839989	3343942	2692235	2536236	3420471	2506414	2948918	3001123	2240256	2940742	2692020	2515899	1715315	2600303	3323040	2306980	2830637	2816679	2299970	2513240	2238461	(312.10815, 909285.5)(313.11136, 114898.27)(314.11298, 17768.436)(315.1167, 2829.52)	4.97189
458.2722@4.971152	85288	1	41305	87135	1	1	1	45896	83189	112470	111896	76320	80527	75260	94143	67878	131042	87797	84178	82908	86385	88021	88335	67189	74901	103249	86291	64178	53739	101768	99797	200783	127572	92215	71885	63612	95700	(459.2788, 7326.6006)(460.2798, 2986.62)(497.2335, 3014.76)(476.3064, 22699.244)(477.30493, 5407.895)(481.26163, 11891.484)(482.26337, 4116.068)	4.97115
722.2899@4.9752164	90470	48572	35819	73823	62381	68131	64713	47027	134882	95145	86176	104846	70568	44222	102728	28980	102685	69686	115922	57926	48855	61208	88915	58659	56573	62321	50711	56247	43949	49439	44476	50978	60031	55013	43805	52318	33477	(723.29706, 23712.582)(724.2998, 8931.284)(725.29956, 3994.277)	4.97522
326.0572@4.987709	133560	84740	90932	96952	1	101903	106913	112682	70906	77604	79894	64908	67500	100932	63117	70460	80554	89275	81604	1	61182	59966	1	1	74159	1	1	1	1	1	84730	1	1	66247	1	63175	1	(327.06454, 24964.514)(328.06784, 4248.483)(349.04678, 3765.073)	4.98771
440.1435@4.9730315	151175	66632	72259	96120	1	73030	125875	186485	64870	66408	55713	41513	48936	83759	79831	118063	48661	205513	42251	34338	175773	1	37999	53086	88765	49336	44834	36292	1	36168	49098	1	36957	42606	25021	41881	1	(441.14917, 28358.729)(442.15283, 6137.2305)(443.15405, 3535.3298)	4.97303
942.3277@5.0028915	53489	30260	37617	47436	25259	47240	76416	35989	127257	141342	110470	200336	166364	98650	187972	101363	217953	101215	102833	103411	85091	79451	107061	95990	86124	111879	111508	87809	56376	61837	56330	75962	78516	85278	68554	90540	53065	(943.33435, 29557.398)(944.337, 14268.003)(945.3387, 5494.7573)	5.00289
632.2219@4.942486	73511	39310	121367	85051	49097	95574	67586	94333	49689	23864	31662	105939	27851	482564	1	20461	935793	37507	106594	89001	71019	97173	35808	68404	50904	88068	81272	32370	43682	27113	134399	1	69600	146883	117669	69136	66895	(633.2287, 34255.355)(634.23193, 11428.349)(635.23303, 5540.528)(636.2355, 3619.14)	4.94249
470.1695@5.013324	100975	122346	107977	114242	88043	123379	230498	108338	153182	208870	326508	274935	236730	283689	169597	160900	237734	253947	225453	149670	151036	179507	267747	184396	212469	182573	118129	185154	136283	121250	19140	135252	233873	200102	189970	170033	250310	(471.17673, 68362.68)(472.17963, 18021.162)(473.18307, 4311.5303)	5.01332
572.1685@4.6176224	225360	243463	195314	198819	49510	29687	276534	150800	186363	270910	279248	307340	238546	290744	204762	312527	284223	276902	174236	98367	128487	158044	122561	137522	194987	144692	187136	168887	198963	209992	246573	166434	186046	385645	93795	160624	185234	(573.1839, 66498.58)(574.18695, 18029.977)(575.1777, 6917.5483)	4.61762
518.1903@5.0233335	55064	40211	46102	33145	1	43417	52846	30651	59833	67198	48205	34321	47818	44108	51743	57762	44055	47600	87390	66196	80111	71130	64648	63880	60360	86653	93931	52243	65165	90476	54232	71685	84669	121114	104908	71264	84303	(519.19745, 21045.82)(520.20056, 6119.025)(541.1795, 4883.589)	5.02333
1135.8854@5.035514	269515	278448	249969	246317	190665	345643	244378	265006	376664	391261	459946	303030	370003	255587	1	1	379427	289580	384992	312178	374621	179004	362187	365947	345881	333132	321053	303086	101079	296505	398639	262571	323362	279599	268637	331645	305576	(1136.8923, 38275.594)(1137.8928, 7911.9053)	5.03551
1136.0854@5.0339375	1	241105	219891	217959	1	311802	1	238083	332629	356023	407449	263325	331655	231836	259470	382499	359700	262458	349934	279847	1	1	317713	328950	330727	291643	288548	271237	218524	260156	344251	245036	289489	241734	233741	287226	273042	(1137.0925, 37382.668)(1138.0936, 4656.3945)	5.03394
1135.4856@5.0363517	234826	240863	219304	203312	167961	299864	218097	234148	324952	314743	370944	233947	321538	225463	251537	343033	308103	242170	309863	274377	296942	159102	307874	319090	1	292274	1	246622	1	263303	336438	235228	271529	243872	182021	271096	269329	(1136.4922, 19368.88)(1137.4922, 21148.453)	5.03635
811.0639@5.0355883	213592	214023	196984	199867	148102	283215	182029	228609	287457	303866	352010	236759	1	1	227623	318866	287778	229236	299727	246326	303122	138939	277653	277731	105563	207136	264006	242423	86908	220539	299733	219258	244218	185151	204716	1	239105	(812.07086, 27437.062)(813.06885, 11840.637)	5.03559
1135.685@5.0372777	258737	272134	240145	243741	180935	335278	242869	258242	375495	366230	449111	295205	335354	260943	293670	365134	360240	286298	378620	303953	350958	1	351241	348359	318230	335660	317989	293666	118694	282676	367954	265398	327329	259888	253265	321283	291521	(1136.6923, 31677.361)(1137.6926, 13620.119)	5.03728
1892.8134@5.037703	1175387	1272204	1149889	1133600	923436	1592205	1085808	1258106	1740979	1757334	2006024	1268111	1641312	1130114	1333509	1874798	1735316	1295160	1702655	1434861	1700276	1104194	1601013	1685529	665685	1507035	1488846	1372349	613905	1337771	1644738	1226921	1413303	1204102	1287259	1520265	1410257	(947.41406, 90922.484)(947.9133, 87830.88)(948.4116, 23044.76)(948.9119, 3878.3838)	5.0377
1893.1469@5.0383053	1065945	1139696	1059600	1077527	849595	1446164	1023248	1155545	1584030	1613914	1744416	1211671	1514417	1060291	1193853	1717417	1450904	1178085	1581781	1291821	1588509	1136148	1411526	1536439	839967	1389888	1371767	1203827	1	1209809	1499117	1139138	1320296	1092977	1171275	1374505	1271683	(947.5804, 111655.22)(948.0798, 62788.66)(948.5792, 12715.106)(949.07983, 2698.145)	5.03831
1892.4812@5.037648	1150564	1247523	1161365	1165287	952238	1595863	1102354	1287885	1760480	1743649	1960269	1319552	1668986	1098772	1262262	1908069	1734950	1295435	1693606	1460223	1709865	1371767	1589576	1670628	1405649	1527404	1500927	1410322	422326	1367971	1655103	1266236	1456715	1204400	1273218	1487084	1439661	(947.24786, 54947.395)(947.7465, 108084.05)(948.24634, 39611.14)(948.74536, 6894.108)	5.03765
811.2069@5.037917	256837	285385	254450	253619	208900	333789	258177	289621	375969	387174	412371	297770	389486	1	310101	442845	384216	288355	373185	331188	379108	107364	359195	372216	370365	329962	326839	327081	133221	301012	409095	274196	312996	277649	262571	344606	319123	(812.2141, 46233.34)(813.21265, 6717.7554)	5.03792
606.2057@5.0418057	44776	38312	36929	54621	31617	21102	64341	39258	49480	70201	77229	58807	35416	39714	29185	21145	53651	65041	96565	46623	41860	55144	29836	36765	46572	45546	1	35530	43162	52625	43915	29746	43798	90654	35688	45148	34753	(607.2125, 16523.693)(608.21735, 5812.7476)(609.2218, 2966.5)	5.04181
372.131@5.045729	336966	291219	346818	242515	211654	378741	262928	298249	515295	398162	356875	357874	375179	547753	419220	363842	328040	25425	273073	240564	357607	255383	416319	306516	276818	302378	276744	237321	286061	272887	301732	350132	422592	220589	171788	350774	304299	(373.13828, 110495.99)(374.14084, 23115.54)(375.1438, 4423.213)(355.1386, 10267.71)	5.04573
534.1853@5.0529995	257610	132727	167269	121373	98867	177820	121972	129738	269418	186845	168511	177251	172910	278297	198687	163307	147443	234529	119826	105635	144534	107146	196239	133223	114442	132431	119827	108119	126171	111788	135249	167409	216880	85139	59454	162031	140973	(535.1925, 44180.68)(536.1956, 12014.824)(537.20044, 4325.2163)(557.17444, 12010.624)(558.1792, 4150.329)(559.1785, 2870.01)	5.053
2085.2122@5.0844817	1	1	1	14353	1	19278	1	19974	1	15178	17571	1	15397	16751	1	1	13968	14453	39733	26856	26333	27053	22645	30014	27131	33226	14005	26313	24929	14061	27975	1	16974	31909	23183	22914	26963	(1043.6146, 8075.6167)(1044.1146, 5411.0073)	5.08448
2084.8748@5.0834	1	1	15798	15448	1	1	1	16018	1	15966	19260	1	17130	20989	1	1	1	17334	41171	25128	27658	27867	21705	30252	29354	32780	17287	24784	26204	14012	1	1	18417	31376	25763	25988	27018	(1043.4441, 6469.655)(1043.9479, 6878.3633)	5.0834
144.0422@5.0062003	111799	102473	1	80073	55464	105389	74549	123687	87177	48386	61868	70018	92715	72709	50232	62678	63279	25631	235248	60920	166107	49351	167387	127246	124939	1	130708	64709	135290	33756	124751	51734	144590	256127	63586	124456	200042	(289.09155, 19256.2)(290.09543, 3369.94)(145.04987, 9868.42)(127.03882, 18466.105)	5.0062
306.0948@5.0351624	58076	92870	150690	133057	35866	100104	103883	119676	81595	87313	57033	79900	110230	77816	84816	78178	86312	72480	188595	164835	150309	173760	145787	151711	156481	81483	67894	187566	43846	107322	154821	61441	121168	230640	54495	142472	172965	(307.1017, 39477.2)(308.09494, 11147.443)(309.10754, 3414.82)(289.09146, 12141.926)	5.03516
593.2324@5.089406	151798	140232	175519	195283	109023	158423	154638	175561	88432	105504	136277	75555	143322	226200	113167	103759	120220	168363	301314	254141	238206	258775	199258	225303	224924	261526	176749	274261	296369	156584	209167	151948	164873	385542	324325	216972	274966	(594.23975, 71075.02)(595.2423, 19097.871)(596.23615, 5479.7656)	5.08941
396.1423@5.0897837	147148	135375	165592	199745	96971	143891	159100	183526	94289	118613	134747	83020	152942	240805	112803	98220	124977	175096	325851	232009	224699	245922	201439	216075	218674	250913	177378	283673	253643	160935	203128	153159	175615	387345	336531	216792	273172	(397.14944, 70983.23)(398.15222, 14507.806)(399.15442, 3986.2117)(379.13763, 10289.082)(380.14124, 3466.9033)	5.08978
598.1886@5.0896482	360034	340337	400875	448520	286212	391248	349633	432385	229823	263076	282882	185053	312741	483807	273742	237863	261882	381868	583672	547706	527577	539550	426087	493825	501628	536976	407423	591876	614449	336864	430861	338566	362645	734265	677063	456092	573309	(599.19574, 144280.25)(600.199, 36709.938)(601.1959, 10601.875)(602.19666, 2955.28)	5.08965
315.0634@5.0989003	68997	37960	1	74886	33320	39456	43138	1	33648	1	34777	22605	38073	53644	38070	29663	33152	48496	1	91752	79846	1	53874	76352	74075	87840	51896	89717	84871	45478	1	1	42679	114398	95631	51622	90310	(631.1319, 8910.166)(632.13715, 3301.7375)(633.14136, 4017.1042)(316.0723, 5742.2456)	5.0989
610.1538@5.0992703	172570	157389	163753	184310	129332	129564	185463	133981	146852	161061	173175	149805	167046	83501	134035	178550	143068	127761	182616	149412	132164	135707	183855	129245	120106	190058	192692	154459	135809	135273	127983	158279	162023	155292	137951	161991	145519	(611.1613, 53756.56)(612.1646, 15292.4795)(613.1713, 4742.0684)(633.1424, 4080.194)	5.09927
330.0854@5.109054	285787	258495	260093	259267	152784	318586	230385	249078	187198	221804	209193	192012	178077	147264	225604	198958	211788	180158	198640	219290	256650	200710	211287	196030	157554	212656	243181	182572	196366	211123	216430	192719	211276	216955	179420	88127	154956	(331.09268, 73376.586)(332.09583, 13181.915)	5.10905
498.1488@5.114973	173985	190837	133194	169595	108520	129619	257300	143523	138177	298195	284399	348011	200978	224950	169986	236219	244664	226774	160666	115044	119405	152243	138850	133889	168173	128009	158332	182047	52514	98225	210083	144524	135863	98513	52970	86818	108234	(1019.2945, 4028.92)(499.15625, 36162.695)(500.1595, 8689.347)(501.16476, 3399.1333)(521.1414, 5152.517)	5.11497
913.3124@5.1145	67804	43770	1	69785	1	86068	103893	66850	117527	204986	180574	342818	145923	99240	186712	71121	226526	178767	149322	90538	68741	123043	157183	134763	128091	93344	108052	118697	1	36959	113310	74402	67740	66487	51047	80136	53184	(457.66483, 15283.297)(458.16675, 7832.102)(458.66827, 4339.0054)(914.319, 22953.203)(915.32184, 10567.629)(916.3238, 4355.18)	5.1145
542.191@5.1175947	337581	140332	232865	174564	169400	183483	249887	200105	310086	550608	408828	542463	333751	300555	378482	145445	423123	405709	369330	267655	203782	404726	414263	319600	333633	320480	238904	369668	186386	422175	475295	308000	600663	590640	368470	607177	185893	(543.1983, 128285.125)(544.2011, 35477.242)(545.2033, 7681.571)	5.11759
314.0906@5.1241903	137695	121219	107113	114249	77262	140287	108547	121179	74261	106525	93483	74332	72789	67036	83490	93815	98188	84766	108818	102439	97913	88688	90452	79380	94901	108513	117912	94661	92134	88658	126833	85777	94938	113585	97225	89082	71980	(315.09766, 39921.49)(316.09937, 7613.4316)	5.12419
502.299@5.128452	83204	1	1	84256	41920	1	1	43612	94612	109408	107300	81574	80961	70060	102435	70867	140977	87302	101194	82018	87197	86441	97931	70958	70602	100577	82284	65968	1	101791	116097	209736	136789	89181	1	58141	101905	(503.30566, 7290.879)(504.3095, 3490.69)(541.2586, 2995.34)(520.33307, 22566.055)(521.33575, 5921.761)(525.28796, 12411.124)(526.28986, 3805.2412)	5.12845
378.0934@5.1381354	248360	273494	226217	288269	181894	252826	346594	239881	245126	310267	312741	437273	344297	574910	282999	353219	343083	326910	251492	175756	211223	253579	190868	244307	234369	222489	186082	239360	130256	160285	322964	228945	234326	169943	131294	192358	201585	(379.10062, 104964.98)(380.1042, 17724.646)(381.10327, 4535.177)	5.13814
734.2857@5.1191473	58520	71271	72090	96215	53010	19804	29775	54649	1	77787	102774	78372	107315	124705	76097	115324	110557	73077	98727	17308	69014	75176	72423	67446	1	73732	57769	1	63976	56643	82524	50985	68057	97149	86122	58616	71175	(735.2897, 14943.175)(736.292, 6015.201)	5.11915
554.1638@5.1401896	140003	130584	77354	150613	127051	120693	197549	118097	120626	168971	129395	183241	132623	94289	110997	118539	146979	105637	116596	120235	103402	116573	169804	90828	76238	117434	152559	122768	100826	100218	93250	120833	149326	56254	87903	127073	81801	(555.17145, 27146.617)(556.175, 7482.199)(557.1799, 2969.27)(577.1539, 26697.318)(578.15814, 7385.169)	5.14019
373.1378@5.1393247	283594	309759	253151	325175	193552	278223	406098	253947	267930	358808	380502	492996	420223	609962	336393	414216	415312	368748	319349	215887	255529	303289	245638	281462	280718	275116	236643	286508	168025	199612	396961	291880	301256	224317	160181	241941	248655	(374.1451, 115310.98)(375.14853, 20465.098)(376.13968, 4998.2783)	5.13932
216.0787@5.0896206	21717	17265	24695	1	23329	33935	26352	28446	1	1	22120	21422	56301	81664	45029	1	56658	54117	46683	30726	1	39822	32817	41351	23272	39423	33086	19565	1	1	61993	38977	42911	32043	26941	1	32791	(433.1464, 4946.19)(217.08597, 8940.337)(199.07527, 7822.4575)	5.08962
248.0536@5.275971	28194	40479	48435	34198	1	27206	54025	77017	37538	39623	54937	45090	38295	49004	38778	25977	27838	37786	48509	26244	23743	51941	23185	48989	41337	40707	18680	29601	24692	1	46782	35647	32105	19225	1	24472	20677	(497.11526, 6397.255)(249.06087, 5878.0684)(231.0498, 12797.452)	5.27597
338.1@5.135676	77968	75043	65707	80869	48180	68753	99369	67714	69433	102050	107755	135235	107888	154003	84676	102807	105706	101424	81039	56683	66153	78867	63208	72267	72786	21014	61986	74734	45406	58382	98224	76862	84105	66346	45368	64134	60128	(339.10745, 29126.828)(340.11084, 5508.9473)(341.11426, 4250.45)(321.098, 5269.36)	5.13568
230.0428@5.148032	71819	76693	56791	92523	1	63111	133344	1	1	112982	120760	162039	106205	213640	77371	108227	118929	102683	94666	47579	60537	74888	52792	74201	64091	1	50898	69218	1	44907	120830	68573	71101	51495	1	53518	55863	(461.09485, 8302.07)(462.0979, 4510.05)(231.04959, 22411.785)(232.05327, 3695.1978)(213.03929, 5155.6167)	5.14803
320.0938@5.17247	117675	91512	104749	128841	78194	113004	154242	113856	100603	129562	80741	224576	102452	210901	112372	151293	91299	1	115049	94626	114069	115725	47674	108393	60561	94953	96418	64296	1	92957	75780	54272	102290	102500	67842	1	66251	(321.1115, 41163.77)(322.11465, 7249.6343)(303.0879, 12938.716)(343.12686, 3715.5833)	5.17247
506.2272@5.146	1	1	1	1	1	1	1	1	1	1	1	1	1	1	1	1	1	1	1	1	1	1	1	1	1	1	1	1	51555	68326	111626	76432	78780	66997	57569	86149	68992	(507.234, 29907.492)(508.23676, 8454.435)(509.2355, 2772.88)	5.146
978.264@5.153514	70256	64057	68437	85875	39602	23758	89510	66158	48132	79424	96918	84618	71122	67966	66494	91861	65644	57753	102157	90309	71532	66941	72048	72245	56511	103108	92020	81533	72932	49818	72105	45000	68415	91155	39482	77216	67014	(979.2714, 23328.781)(980.2743, 10911.06)(981.27734, 4149.6265)	5.15351
482.1543@5.157813	72210	69212	47995	62804	33550	58403	83246	49378	45514	90407	85080	104776	65230	90237	66522	81410	84390	92191	55204	1	1	54406	49442	43977	64892	42370	49408	62135	1	1	84918	52284	56963	32603	1	31328	35034	(483.1615, 17546.162)(484.16525, 4618.6675)(505.14648, 3537.9438)	5.15781
572.2013@5.0602975	75171	95356	81272	122384	632879	546515	144768	111810	110491	266289	238849	234081	196665	222591	132863	117521	220643	275804	276692	225788	190533	226876	160836	183358	2356892	317675	110642	183351	1709179	2271940	267847	166323	215422	3745328	1478638	2010882	1893359	(1145.4065, 8426.793)(1146.4175, 5906.853)(1147.4177, 4813.24)(573.20874, 216117.38)(574.21204, 56833.062)(575.2135, 31302.838)(576.2155, 6824.6353)	5.0603
453.1638@5.175081	45032	30706	30800	41945	19435	33427	50152	26031	49403	48579	60822	69238	60198	61058	55295	68541	58214	48309	44878	36363	47969	44502	58557	37725	48939	46872	60262	43630	31515	46935	59097	59491	52300	39324	36929	35391	31470	(454.17114, 12930.498)(455.17825, 3933.1833)(476.15387, 6328.4683)	5.17508
368.1109@4.9006763	42516	43392	39755	83832	1	1	107791	76782	76235	53781	45981	34183	79051	86325	40247	103750	87156	144663	32558	77986	58732	53343	68075	71251	51708	82523	41511	47932	70292	72360	69222	64929	30465	69838	1	106829	66892	(369.1184, 23219.76)(370.12067, 5027.1787)	4.90068
469.1583@5.205862	122803	91190	86389	104952	61955	89990	125358	97503	81138	92570	1	131094	89885	125973	81980	94471	103436	102091	78763	68929	79478	85697	98738	77794	96540	75539	110118	89464	64335	88450	121181	136180	118635	87282	69752	88266	81603	(470.16617, 7951.942)(471.1761, 3078.18)(492.14807, 29210.424)(493.15158, 7146.9766)	5.20586
590.1987@5.2483845	29027	27229	1	28341	1	32286	1	26351	1	1	28243	1	1	35982	1	41776	1	30290	26316	24204	36766	23491	30704	28726	25110	24741	29429	27023	32261	34284	1	27257	29969	31407	24840	1	31138	(591.2057, 10676.314)(592.20825, 3723.923)	5.24838
279.1115@5.255467	1	23401	1	24819	1	27247	24829	27375	1	1	28401	24141	1	20736	26898	29315	27818	1	27460	56789	40093	31731	41249	36473	37055	40954	47675	41087	88728	119700	66800	74630	59947	100956	67360	83063	105850	(280.11755, 7996.5107)(297.14136, 4411.1733)(302.10165, 14825.265)(303.10477, 4412.3584)	5.25547
546.3251@5.2706895	74871	1	1	72733	1	1	1	1	81555	97038	99494	78730	74223	65791	92041	62677	128297	73184	84775	70153	77044	70813	82897	62476	62393	86636	72274	57752	1	90443	95253	182603	122117	75030	61498	1	84319	(547.3313, 7027.0977)(548.3335, 4064.99)(564.3591, 20595.154)(565.36206, 5682.755)(569.3141, 11321.111)(570.3172, 4353.534)	5.27069
106.0419@5.2835135	254902	239566	159343	150559	168324	288581	144276	165215	330736	249290	247449	193236	212132	239822	259127	294478	263546	221416	211485	292446	403163	220017	326611	324373	233984	265506	269637	210509	395431	622351	406818	498660	358004	485242	295217	448689	437954	(107.04928, 99380.46)(108.052536, 8186.065)	5.28351
133.0526@5.283549	40900	31989	1	1	20758	1	1	1	42386	32875	33641	1	27039	29055	33372	40722	38440	29331	24696	42654	62200	28786	47347	44512	32855	35890	38981	27561	55218	111175	58107	88427	49784	81091	42372	76329	63527	(267.11343, 4043.0425)(134.05974, 13817.676)(156.04158, 5154.234)	5.28355
548.2373@5.295108	43974	61185	46169	67692	42111	62022	75939	42417	75750	83784	87786	99145	97632	77896	79266	106141	157856	86587	79387	52103	52113	60012	87674	64277	72400	64534	54703	73912	45704	54419	70753	75670	66425	66025	59570	43634	57540	(549.24426, 26311.703)(550.2469, 8176.823)(551.24335, 3624.6802)	5.29511
890.2491@5.301487	60025	48032	59074	55153	45707	55330	105340	57145	61314	134920	104197	109389	65278	61323	74960	63504	105822	90983	85036	64756	55890	62562	82735	84735	115370	67389	131565	81707	55945	82849	100718	115346	86087	93002	61921	69624	58467	(891.2556, 26950.822)(892.26, 11847.378)(893.2631, 4569.353)	5.30149
572.2017@5.192351	863594	1056257	1135838	1228791	160834	302564	1804515	1091261	1295936	3074268	2791010	2466151	1797287	2260721	1604209	1885770	3001976	2645560	2946982	2151545	1970915	2326898	1483712	1864897	273258	2391303	1399341	1858139	47581	237955	2577753	1580390	2284344	621247	471289	416080	216776	(1145.4078, 7295.142)(1146.4182, 6290.6675)(1147.4019, 3772.54)(573.2094, 581406.44)(574.2124, 148856.34)(575.21326, 30588.99)(576.2151, 6393.654)	5.19235
410.2118@5.3058963	1	16768	14329	18836	1	1	15650	1	22865	29028	29827	22054	29814	34956	33440	41651	34776	26621	25978	21766	1	17002	1	22353	15670	25311	16811	14244	11911	13072	18759	14856	17380	23778	1	14927	1	(411.21692, 5884.0254)(428.24817, 4321.353)(433.2027, 5027.7583)	5.3059
463.1057@5.3217034	745178	768160	674412	695784	982442	1038973	775759	597437	689533	731113	755556	960289	377967	887251	807520	937282	879776	753695	658158	615128	511993	793319	544721	660531	776661	616229	763758	606622	664081	371904	687668	438970	469063	428442	626739	488850	685094	(464.11328, 253972.48)(465.1156, 55210.26)(466.11337, 18771.145)(467.12097, 4043.1685)	5.3217
392.0722@5.3321395	68325	58823	66098	59899	49666	65900	73544	68705	47940	55713	45227	58401	56399	80423	41938	32981	53832	63420	74262	57639	61066	62962	49745	61294	64030	53132	35101	57702	1	36718	71864	49761	49228	58346	43891	49896	63143	(393.0796, 25001.807)(394.08417, 4877.994)	5.33214
387.1166@5.3256917	53615	42620	50509	1	1	51600	62877	53063	35942	50488	36813	1	46343	62149	1	1	44155	1	66089	42583	42568	50045	43550	48445	1	40450	31233	48354	1	32499	63233	45557	1	48334	1	1	48805	(388.1239, 20359.156)(389.13547, 4262.2075)	5.32569
219.0526@5.357136	769252	590168	602381	684666	420679	584723	738069	584786	685127	786937	829094	895953	776478	890502	689604	850662	786247	756349	786196	671458	711949	695722	732035	672166	641077	734852	718432	668319	537353	609244	820464	708519	706089	696296	583497	589044	602015	(220.05983, 210690.38)(221.06288, 24477.504)(222.06502, 3658.4417)	5.35714
346.1624@5.3688283	443604	347772	341067	400869	204960	217150	496962	1	1076281	963337	1385974	1198762	1193621	587837	1640086	1856915	1238808	510279	1356367	273631	588131	435164	909768	629470	594414	680269	1952378	513127	190274	313172	158064	211306	182496	194225	197974	81301	1	(731.28723, 4199.89)(715.3146, 68411.086)(716.3172, 23233.049)(717.3186, 8014.1655)(718.31946, 3652.66)(347.1689, 17473.94)(348.171, 4978.9546)(385.12717, 13056.63)(386.12866, 3560.8867)(364.19598, 39444.258)(365.19824, 8004.6113)(369.15057, 44747.656)(370.15198, 8794.052)(371.13843, 4037.7136)	5.36883
184.1087@5.372233	211216	185701	172084	113423	1	102524	147967	1	237793	245198	351865	522538	540067	215533	349549	446589	297391	159304	358154	330095	165562	253987	263060	179068	167411	202231	421661	166012	1	201424	1	155010	141532	153906	1	1	1	(185.11589, 83016.55)(186.11891, 9171.382)(167.10555, 48878.926)(168.10873, 6041.239)	5.37223
782.2965@5.373733	1	26453	1	28484	1	1	36186	1	34680	40287	62285	43941	55323	79044	52659	67543	60784	42597	64881	45771	47773	38835	59265	44720	46832	45909	65637	50488	23371	34397	30818	28254	27552	32761	31763	1	1	(783.3037, 17523.705)(784.3063, 6864.276)(785.2991, 3924.6511)	5.37373
144.0416@5.3033514	36120	172552	107304	93679	105345	112894	136579	97556	18704	30724	143261	20375	137401	135629	103145	31280	42274	148485	35989	125222	162561	147962	55682	249241	237198	177241	141621	152958	233520	116384	357126	110093	206095	332766	238678	210219	21671	(289.09116, 21632.547)(290.0945, 3726.45)(145.04909, 13524.96)(127.03864, 19306.637)	5.30335
306.095@5.3755407	95301	109402	113739	131899	77879	88481	106323	105221	108767	144117	167236	134153	151671	360569	127714	172648	169427	181097	198374	193040	196156	189454	194571	194020	199310	221573	162451	242456	182638	192154	320004	207473	255759	263258	229813	177065	224916	(613.1977, 5764.254)(307.10217, 64688.29)(308.10556, 8851.66)(309.1131, 3332.9028)	5.37554
396.1415@5.3758383	160028	255005	186275	237093	144598	134225	283414	176234	206219	251742	274575	208380	270468	613473	233325	301148	300239	338376	345857	307705	348529	323233	332800	345270	344342	384313	265766	405263	342616	301095	530622	304396	432353	454721	395637	301701	397298	(397.1491, 107088.91)(398.15213, 21484.29)(399.1545, 4818.419)(379.13736, 14480.438)(380.14014, 3638.8396)	5.37584
360.1209@5.3751197	1	128398	36817	1	1	1	75740	1	1	1	1	1	1	56292	31359	56910	29365	41105	65541	22144	24814	24159	23334	25502	34569	33091	21448	36340	21920	1	91347	1	37463	35993	25799	21956	34172	(721.25275, 5247.2695)(361.12802, 11111.138)(362.13028, 5359.378)(343.1177, 7231.303)	5.37512
414.1528@5.43675	1	1	1	1	1	1	1	1	45500	88387	85663	110050	72044	1535342	60487	297944	32385	826046	348638	43298	353311	1	815087	53255	369325	372423	276580	423774	814606	336010	21108	837668	1054583	1065095	394647	322139	423661	(851.2932, 5618.299)(852.29663, 4299.3)(853.2746, 6517.425)(854.277, 3540.61)(415.159, 11626.117)(416.1615, 5464.784)(453.11646, 16250.622)(454.12003, 3943.2761)(432.18634, 117586.36)(433.18863, 24658.15)(434.18185, 5302.882)(437.14188, 208971.97)(438.14487, 40035.2)(439.143, 8782.03)	5.43675
472.1934@5.376917	28798	23695	28539	29440	1	21660	27526	23334	38382	47970	51854	50063	44181	58162	33981	60176	55968	47563	60918	37936	50907	42822	43054	31775	30243	32272	30134	35727	27957	33213	46222	39272	40777	40412	31486	36904	39959	(473.20102, 12339.123)(474.19235, 3819.6323)(455.18738, 5020.9756)(495.18265, 5354.8374)	5.37692
441.1118@5.3797	1	24272	1	1	1	1	1	1	1	1	1	1	25159	1	1	22994	27118	30322	26902	41783	34894	29067	32222	35698	42953	44718	1	59697	48820	35480	1	30354	1	58298	48657	28567	1	(883.2311, 7830.573)(884.2347, 3770.6567)(442.1197, 5424.418)	5.3797
224.14@5.3810005	138812	126076	101958	100536	119259	95287	94648	65862	147157	71170	79853	66864	109446	57603	55523	71089	77300	52845	149655	122673	67854	115055	64738	59174	105560	76717	70110	73550	106483	60394	129872	64057	75972	79900	73358	123949	133436	(225.14728, 28574.986)(226.15045, 4343.1636)(207.13695, 19925.727)(208.14009, 3474.8618)(247.12885, 4082.3088)	5.381
218.1147@5.0665603	1	1	59917	1	1	1	64911	42401	58060	42688	30888	25688	32462	33811	30289	45588	29103	29527	39639	1	27599	49158	1	42007	1	38881	1	22069	76559	49205	52942	1	1	69476	1	19861	59122	(437.19296, 4061.6797)(219.11176, 7788.1123)(236.1479, 3825.5945)(241.10405, 18034.686)	5.06656
380.1009@5.395649	80452	81148	47590	99926	53040	101354	107117	158839	42840	65944	61836	41351	47002	47050	50728	57051	43583	55686	46875	73065	95404	64500	67880	75083	50960	73574	82080	60521	61772	103338	35142	38873	56037	50998	41748	48309	54722	(381.10846, 26307.514)(382.11154, 6161.1455)	5.39565
580.223@5.4346213	71765	73741	90653	69676	28817	51498	102605	44316	61403	76058	107997	74376	80776	76890	63054	77931	106258	69574	88550	62595	63653	55873	9919	66920	76841	74594	89749	73460	60614	104730	89734	41300	106994	104024	66678	86867	59950	(581.22845, 10132.634)(582.2305, 3734.6145)(603.2128, 16950.209)(604.21594, 5484.7407)(605.20856, 3108.1768)	5.43462
597.211@5.3360667	27389	20723	1	1	1	1	33420	26627	24684	28925	42955	35771	29025	15895	31313	46184	31565	18212	22016	18577	1	18571	44548	18195	24619	1	1	17891	28704	19300	27322	41513	36475	16553	14642	25452	16165	(598.20807, 8991.682)(599.2037, 4462.2)	5.33607
452.2233@5.433956	1	1	10715	1	1	1	1	1	1	13551	18385	1	15483	25962	1	10755	1	23460	23137	14261	17938	19258	21257	17461	22520	18589	1	21695	15617	1	30087	16481	22776	24595	20291	1	19871	(453.2321, 4531.892)(475.213, 4769.015)	5.43396
442.1441@5.5208216	1	1	1	1	1	1	34603	1	45527	47036	58164	55193	53982	61411	48006	48599	66304	44226	38836	37978	1	96131	71385	65832	37276	43609	34082	85174	42539	38735	67093	64328	58494	29575	1	41349	96248	(443.15265, 19096.016)(444.15598, 4497.896)(425.1434, 10712.863)	5.52082
478.1593@5.453648	188187	190747	133971	152143	71599	122900	230847	117494	188061	253875	275012	283937	297593	337151	211094	287092	254496	243771	191400	158383	157984	138255	190158	163509	139108	167472	169978	148636	110924	160070	294731	204272	217461	140181	99643	136081	146397	(479.16708, 17402.904)(480.17017, 4739.6255)(461.15616, 8518.012)(462.1619, 2907.75)(517.1247, 4744.298)(496.19272, 15992.838)(497.19766, 7307.4766)(501.14865, 30180.945)(502.15213, 7719.0474)(503.16202, 3069.7917)	5.45365
432.1617@5.491487	135445	101964	93726	122938	51242	116829	147339	96984	124950	241959	249585	326990	188409	364835	171570	167780	285453	253328	197929	95809	113784	155222	122943	146003	190772	148629	92850	155852	52604	85903	231949	181058	106094	96310	64681	87196	97108	(433.1688, 59487.14)(434.17184, 11034.62)(435.17175, 4101.241)	5.49149
502.1842@5.437135	24338	154393	160859	94758	94810	27056	131530	170369	135752	22222	133347	153499	142233	22814	182243	272805	192560	175082	149861	121194	186215	107747	19152	150955	126914	159055	158995	140639	103994	154823	184217	136350	139867	122719	117173	141899	113981	(503.1913, 46121.426)(504.19357, 13461.039)(505.19528, 3828.7012)	5.43713
399.0389@5.5172215	1	1	1	1	1	1	1	1	93872	111117	123633	166798	129048	143980	117828	59740	150159	149990	88477	55874	1	84683	100016	54836	147262	99491	41261	81368	1	79041	238623	228360	103650	76915	54205	69590	97889	(400.0467, 40206.367)(401.04944, 7893.974)(402.0433, 6314.686)	5.51722
296.0896@5.613076	1	1	1	1	1	1	1	1	80386	79912	59041	85910	46240	67321	27372	1	85267	41060	24236	49485	36616	63944	119713	55702	69626	67295	1	61181	84885	67902	81046	145676	104810	42640	1	59768	34736	(297.0969, 25349.924)(298.10046, 4910.4805)(279.08594, 5202.1846)	5.61308
611.2214@5.5545483	1	1	1	21278	1	1	35339	1	66146	59158	46795	58270	66995	47745	68374	37697	59931	49780	44866	45000	33376	53550	117790	47294	49600	57537	42423	44188	75257	65852	66304	143372	94295	33126	30502	58683	38930	(612.2286, 22111.576)(613.23267, 7410.7993)(614.2332, 3792.98)	5.55455
929.42@5.561541	105910	114916	119910	110258	81546	88075	123046	100546	66999	64352	74632	49712	52863	32330	47594	67038	54550	47244	56258	66075	47496	52146	49518	49134	42829	65720	62552	59605	44437	38435	46550	33205	48833	45916	40628	55503	46137	(465.71747, 18413.307)(466.21906, 10217.896)(466.7204, 4211.5093)	5.56154
816.2136@5.5738373	1702162	1392468	1490653	1788521	1026293	575404	2045051	1508762	1086463	1828100	1764900	1576864	1361200	1068505	1245062	1596359	1139834	1128418	1650827	1445234	1299767	1219739	1267447	1224448	1045626	1718409	1963931	1351322	1342484	1144072	1408706	1035044	1303603	1473169	795078	1328635	1215104	(1655.4059, 3397.745)(817.2212, 411700.34)(818.22363, 154351.02)(819.2253, 41300.637)(820.22815, 8629.063)(839.2009, 30258.732)(840.2038, 12367.997)(841.20233, 4586.602)	5.57384
654.1588@5.574108	100911	77128	83228	106532	58180	34268	112350	84510	64163	98482	100006	88395	74831	59676	72216	92580	64923	65521	92153	83565	74324	70382	74346	73352	63305	95662	109243	76206	76399	66501	80884	60363	71568	88522	47698	75833	69619	(655.16614, 26870.402)(656.17, 9209.481)(657.18207, 3263.581)	5.57411
870.1337@5.5751085	65266	58397	62829	74682	57287	28456	74001	68551	51938	67540	62342	60703	56761	48051	54930	62909	45831	42034	61857	66172	55983	53964	52004	57000	47921	62320	80514	60132	56201	52697	46297	42501	49374	63431	36960	57675	60737	(436.07413, 15146.257)(436.5758, 6610.9614)(437.07736, 3732.025)(871.13776, 2757.5625)	5.57511
786.2011@5.582109	116998	55720	59172	81415	44975	56114	88702	62560	53920	86180	99428	89464	61071	38550	73577	93886	83713	52012	55562	33586	35858	39155	37346	37519	38127	50265	80855	36259	28983	41883	35678	34892	39596	35327	29390	35576	28616	(787.2084, 17992.238)(788.21313, 7534.5776)(789.21655, 3435.5374)	5.58211
576.2398@5.589162	117823	121393	135868	149268	84759	108327	162774	127173	102474	136629	158178	125168	131383	118224	119031	113858	123297	146347	167374	165892	145638	156982	146095	157021	161713	166400	137082	168527	171772	123568	165875	116599	150957	219562	182506	162652	162799	(577.2471, 48128.24)(578.25, 12351.922)(579.25507, 5088.706)	5.58916
648.2446@5.558799	35215	1	1	37616	1	46858	40344	1	32155	50868	50899	42480	26158	27906	25017	1	41475	45691	63365	30953	29516	37515	30645	28615	33814	35608	24645	28975	1	31943	30719	22674	33137	52750	27979	28361	1	(649.251, 12218.864)(650.25336, 4514.359)	5.5588
572.2378@5.6088643	76413	120022	89884	138351	67064	91250	145338	66473	124493	138280	156658	169738	210228	146383	143836	204940	231789	161637	163794	110236	105197	122257	127305	105465	127561	119121	103317	118646	102637	104056	144441	115051	120494	151647	138265	82943	109595	(573.2449, 44871.145)(574.24786, 14177.477)(575.2486, 4078.6482)	5.60886
339.2021@5.6155005	51057	1	1	43279	1	1	1	1	51768	67659	72362	61097	52102	43784	65840	1	112400	52008	54666	43109	1	43262	52889	43884	30767	46410	41764	25570	1	63470	59274	1	94587	48816	36024	1	54281	(696.43756, 8265.092)(697.4397, 3762.0466)(701.39185, 4335.066)(340.20975, 6538.0728)(357.23495, 3985.5117)	5.6155
394.184@5.622001	114196	101843	95732	108894	57113	98276	146042	96373	102830	175745	270843	218892	151127	238345	143124	139710	186735	197562	159399	98571	112594	129912	108887	129955	148391	120108	89100	148048	87152	84670	195950	122781	215636	124261	101882	111387	114546	(395.1915, 12302.609)(396.19507, 3862.0176)(377.18085, 35173.477)(378.1836, 7196.02)(433.1476, 3620.3418)(412.21677, 5697.182)(417.17325, 38424.21)(418.1763, 7179.501)(419.16824, 3270.9617)	5.622
376.1733@5.5941353	119879	72795	102486	123928	65615	102257	167993	103267	118930	179808	136839	235832	149182	237190	99281	103809	203762	198419	176834	77557	121621	142024	114024	134412	161279	127866	97091	156396	63444	60138	191066	131960	103653	127277	110065	117365	101280	(377.18088, 29786.889)(378.1836, 5998.455)(359.17053, 23973.812)(360.17523, 5396.7627)	5.59414
414.1508@5.6711144	59292	49741	50216	62313	1	48296	87969	42719	33614	23655	30380	27196	39441	118464	29457	41673	90156	98358	39408	19626	53080	62040	48258	15145	72560	19655	66951	67873	1	38293	100091	61240	62484	56993	45489	51458	55891	(415.1588, 21275.338)(416.16174, 4975.467)(397.15088, 6281.3457)	5.67111
578.2558@5.650595	116900	125394	192381	155585	99277	120511	168746	130074	104482	127324	153382	122224	128386	128372	119868	114718	113535	147622	162377	164589	151296	154376	139222	158623	156467	148527	124072	165281	180920	125113	160265	104843	145041	211848	194185	161926	168046	(579.2627, 50804.957)(580.2657, 13167.703)(581.2624, 3848.3655)	5.6506
721.2592@5.657625	13013	1	12960	1	1	1	19303	1	13455	17631	18652	14747	17992	1	28861	12372	38755	13659	25407	13069	11804	1	24232	1	14527	16444	14842	1	1	18767	1	21970	26916	15643	1	14532	1	(722.26483, 6228.481)(723.268, 3359.68)(744.24756, 4265.2847)	5.65763
532.2518@5.654838	37129	32799	49004	40926	25158	35784	48320	33900	25271	38735	37313	31265	31314	23628	20261	41404	25660	28229	54586	37008	47582	46433	27585	38569	40045	41532	57902	38033	30666	31891	32011	20717	36204	56822	46479	46116	27669	(533.2593, 12035.026)(534.2619, 3874.1213)(555.2411, 5920.62)	5.65484
208.1462@5.7237244	53999	1	1	21299	1	32866	62169	1	14307	71818	100979	79724	72572	72804	50691	56757	77242	71972	20052	1	1	24676	84710	1	20903	1	31861	52790	43020	20360	21154	74770	82590	31559	23417	14050	46019	(209.15309, 17475.814)(210.15665, 3613.1187)(191.14243, 4930.7666)	5.72372
342.1108@5.6720552	154090	93456	120834	83380	88962	100351	132347	83084	100956	110292	77498	95386	68559	76924	78455	142198	117107	66661	61551	58369	83830	56232	67144	70869	59128	61343	63385	56488	45939	94233	74784	91624	89055	55601	1	50810	96401	(343.11755, 25675.758)(344.12112, 5583.4224)(325.10852, 11030.614)	5.67206
376.1735@5.682064	113267	113234	63777	108096	67167	92808	157607	1	87581	142529	14064	19167	131360	263989	149882	160387	142195	1	148012	109054	85472	1	1	103615	109680	102917	67964	119385	97388	98875	171541	1	1	104083	80078	92615	129334	(377.1808, 26381.08)(378.18304, 5579.2983)(359.16992, 18649.223)(360.1744, 4687.3584)	5.68206
394.1846@5.6803246	172855	191710	144870	160329	96747	143040	230220	192752	128173	201944	200849	402176	184413	346193	153226	159438	224349	336653	197072	115454	57422	253799	179617	141740	165608	149126	99211	170471	97142	42878	250617	229724	159077	145140	52408	63667	147143	(395.19147, 30046.168)(396.1944, 6086.31)(377.18088, 29197.559)(378.18353, 5916.3125)(433.1466, 3088.81)(417.17395, 36228.727)(418.1771, 6901.27)(419.1682, 4015.6067)	5.68032
322.1896@5.690433	877876	288077	447285	704920	556214	513880	262841	264861	491003	265048	352837	261578	226113	174958	224706	173698	200138	224334	413704	217384	240763	234639	195860	186513	171409	225735	188214	186608	152228	166337	93812	167473	142038	190442	165920	163550	123921	(323.1967, 112632.42)(324.1997, 20448.953)(325.2016, 5563.662)	5.69043
361.2151@5.7055416	33046	1	1	28186	1	1	1	1	35027	46826	52981	34891	32118	21906	43500	25053	71171	23925	34824	19299	1	25393	28125	18842	1	24341	23587	1	1	36756	35964	1	60218	14232	1	1	34261	(740.46326, 5145.7437)(745.4171, 3749.8782)(362.2213, 6383.2847)(379.24814, 4403.8613)	5.70554
408.176@5.722081	78300	62896	75655	82482	51716	68305	81612	65495	66373	42578	89308	72629	89301	73786	68024	80499	67562	53177	85965	69168	75777	83673	88158	74284	72413	78871	69944	68722	74051	74777	79685	58831	74945	94208	79912	74178	63146	(205.09546, 2880.315)(409.18164, 28814.537)(410.18512, 6149.421)	5.72208
578.2555@5.721649	178474	193218	154536	216385	136509	193506	245649	202505	161305	215799	249242	208094	199538	224072	204510	203143	210134	231435	259693	239155	226700	228811	210980	228742	241808	236690	219349	246783	232328	175757	248762	168101	215032	284935	265283	233055	236369	(579.26306, 68442.02)(580.2658, 17330.895)(581.2647, 4613.2705)	5.72165
716.1963@5.7374406	126041	57696	396889	36980	33076	109394	28771	1	50046	50346	47971	19600	1	1	37511	35289	27307	30697	44615	31105	53106	25290	28458	31060	27194	43445	44368	25553	41459	168985	32376	49315	50138	80825	67516	103957	45593	(717.20337, 22426.895)(718.20685, 8353.1875)(719.2098, 6070.5664)(739.187, 4659.17)	5.73744
890.248@5.753404	28840	27676	27391	27082	22900	27037	53680	28109	33762	82532	55667	62453	36276	31621	37002	35868	52687	48331	40707	33646	27951	36726	46143	41882	61633	33749	70445	42009	28668	42175	50976	68123	43470	44177	29479	33857	32044	(891.2555, 15302.222)(892.2591, 6871.1704)(893.2632, 3724.9167)	5.7534
370.199@5.768706	50268	47160	49148	50646	36317	1	61507	1	54419	78232	107794	88476	72982	71456	60858	60250	72852	68240	57827	40635	1	48309	85438	46843	61490	53305	44664	53704	46201	63544	124155	75141	85422	56756	65496	57504	50003	(371.20615, 22668.932)(372.20947, 5041.7715)(393.1889, 19066.66)(394.1921, 4014.21)	5.76871
392.1815@5.779515	87726	81137	72841	85065	68372	73449	93511	57269	83041	96622	125957	105811	94788	85608	91296	88598	97377	88358	77485	71170	40002	74221	112475	74192	86151	80541	77060	83954	73950	74503	134990	93006	100918	78330	96388	61585	77540	(393.18872, 26625.701)(394.19165, 5831.8223)	5.77951
972.3954@5.792125	16665	19099	15910	18651	1	15986	1	1	1	20021	23763	25418	24675	28621	20921	28595	23274	22527	20267	1	15358	1	22854	1	1	16485	15764	1	1	17504	20672	1	27101	20035	17176	1	1	(973.40265, 9527.362)(974.40594, 4938.2686)	5.79213
502.1602@5.852028	103884	93374	68299	102569	46696	74156	104025	108031	109453	111805	103142	78172	73382	104915	100400	121778	92078	197586	104382	89152	215753	84435	90142	111039	72719	105597	96432	110875	59091	80968	86634	62649	78544	106581	74205	76169	70298	(503.16776, 35245.51)(504.17194, 9849.808)(505.17523, 3988.4775)	5.85203
370.1993@5.854031	68746	81601	65851	67212	1	61541	97460	1	87668	125542	186672	147859	114013	118712	97629	87894	122741	113125	81970	55118	1	59893	124213	61688	95792	77726	58648	89240	98421	117531	219424	135037	126725	71413	110988	1	69220	(763.3868, 7643.142)(764.38934, 5427.3)(371.20596, 7256.7124)(372.2085, 3315.68)(409.15656, 8862.66)(393.18893, 26021.893)(394.19223, 5643.7905)	5.85403
1154.4724@5.864054	44089	87083	64872	82366	36510	31589	123319	37504	84515	151107	164166	137166	146701	101198	125440	199502	192284	151549	148102	93374	88810	58261	131656	100781	98473	123767	105979	141080	102277	80071	134881	15912	149618	135184	100409	133109	99335	(578.24396, 14736.349)(578.7456, 9565.506)(579.25073, 5195.1313)(1155.475, 6699.1143)(1156.4778, 4572.593)(1157.4757, 2664.0)	5.86405
513.1212@5.865405	162523	332615	194501	304168	290891	290017	423514	415844	99321	219946	211521	197075	174048	211069	203209	283865	207928	180981	158905	240598	191323	247203	161887	203599	170664	176105	227078	189781	138457	52526	85449	49096	68502	100466	123966	60309	109070	(257.56836, 3923.7378)(514.1287, 63018.637)(515.1319, 16880.691)(516.13043, 6505.2427)(517.1374, 2852.95)	5.8654
452.337@5.8967776	23725	22777	23416	24386	22105	22426	21392	22466	22274	1	19777	23052	20950	22721	21409	19807	24317	23850	22071	21776	24022	21034	22530	20150	21125	22197	22646	23538	18760	22282	21322	21503	22738	23710	25614	21096	20962	(453.34503, 6663.9976)(475.3252, 5618.9424)	5.89678
518.1548@5.9114	66559	39683	36655	38461	1	1	66402	52676	55215	41752	42676	40074	46102	88777	73905	63220	43514	168370	81793	45568	154274	39393	47667	78423	1	43734	37261	73022	1	34472	37194	1	48925	46279	1	33013	1	(519.162, 18438.564)(520.1656, 5290.6924)(521.1676, 3276.295)	5.9114
196.1096@5.9204593	82190	93356	52995	56246	64756	62614	69140	61127	99201	69886	92520	68024	59483	55655	56060	64756	65742	65022	90806	69603	60102	50506	95590	64184	61570	65453	85646	55877	102302	194645	228734	147425	147450	123809	73377	145014	118334	(415.20694, 4869.62)(197.11688, 28251.969)(198.1205, 4922.481)(179.1058, 3355.7974)(219.09883, 8179.0347)	5.92046
776.2141@5.331676	25598	29768	27331	30619	26732	134141	31354	31374	22715	26054	25391	25067	28226	25911	22612	25946	18329	21609	269678	25906	30178	24889	22251	25012	233600	22161	27308	24183	27916	21969	19931	247255	22368	393185	205330	302957	23776	(777.2215, 20050.176)(778.2249, 7597.904)(779.22314, 7884.657)(780.2186, 3201.34)	5.33168
530.1654@5.9778366	2730588	2476784	2837116	3055126	1820566	569400	3434311	2980767	1749336	2729985	2791385	2403669	2395550	2588814	1647857	2272578	1636169	2462339	2936324	2932314	2796061	2603249	2818942	2459502	1767518	3167929	2826770	2640557	3174852	2635696	3160176	2188469	3121479	3736875	1219929	2699042	2646804	(1061.3339, 8259.462)(1062.3379, 4725.5254)(531.1724, 923305.4)(532.1756, 192131.86)(533.1771, 40105.29)(534.1798, 6724.0176)	5.97784
807.1427@5.9787145	26657	28192	29554	32251	26349	1	31636	34110	22384	27141	24808	23239	23826	23625	1	22261	17064	24708	25746	28985	28250	27297	24630	24088	18170	29341	26214	26310	31541	26719	28775	21627	27539	29003	14121	27495	28603	(808.15076, 6551.2607)(809.15717, 4931.7783)	5.97871
1525.4878@5.9751005	19064	16649	18706	19189	1	1	24410	20434	1	16673	16826	14793	15434	16709	1	13643	1	15290	17866	19849	18350	16697	18589	14053	1	19147	20303	18352	23213	16685	22760	16422	24644	31276	1	16823	17180	(1526.4956, 6069.063)(1527.4991, 4576.616)(1528.4926, 3141.635)	5.9751
771.2585@5.9788375	158438	152334	144437	179055	128494	45423	191728	167204	106118	144924	145271	132362	137541	140319	105292	122204	97928	135996	154697	170353	164978	154680	153248	139383	117383	166342	152077	155180	193135	153059	175050	135147	183662	210933	86612	159843	153423	(772.26624, 40740.86)(773.26935, 15086.3125)(774.2516, 5770.023)	5.97884
1530.4445@5.977371	26674	25813	31664	37876	20341	1	38112	28896	13885	23777	24315	19774	20908	22176	14937	18348	13196	23366	25162	29881	33421	25204	24265	21855	15432	28759	27022	26217	39235	26990	27051	19765	33705	41636	1	24808	25421	(1531.4517, 7596.7856)(1532.4543, 5713.132)(1533.458, 3258.1614)	5.97737
368.1113@5.550567	82511	75222	78749	257778	162170	63605	239421	49858	179290	107614	99041	102502	195945	235866	60782	184055	149787	91357	98813	251649	93667	58115	74475	211895	62160	77919	85578	82072	265638	235348	234698	66564	68435	307871	130953	68481	225031	(737.2297, 4412.8457)(369.11945, 42473.98)(370.12265, 8487.954)(371.12756, 3116.5867)(351.1091, 4081.0884)	5.55057
787.2694@5.981929	24274	1	28549	1	1	20964	26929	34891	1	27525	26894	27680	22691	34523	21873	32327	29081	26160	28077	21532	22682	19521	20430	1	27876	21692	22151	21998	1	1	23405	15625	1	19949	1	15010	16766	(788.276, 8930.478)(789.2807, 4011.9172)(790.28973, 4843.83)	5.98193
494.1767@5.9841356	62326	65980	48154	63825	40508	48174	80769	44974	66434	76622	104616	85013	79551	77160	66915	77451	73247	71538	75621	65387	63450	68330	92160	70587	75649	75981	65495	70366	49598	65815	39996	78095	89743	65529	71767	61049	69928	(495.18396, 21686.17)(496.18744, 5410.7017)	5.98414
356.1375@6.005973	82268	57918	67891	60654	38870	69051	81660	56913	130550	99725	77423	83095	107991	115355	100670	94718	97240	94174	138285	100379	106589	117107	139766	117807	99652	149593	94416	94200	165449	191067	133010	157924	183781	272395	223998	208132	132512	(357.14456, 45475.53)(358.1478, 9488.331)(359.1499, 3248.18)(379.12997, 5493.2534)	6.00597
298.0994@6.002459	16133	29546	63930	26257	22046	24608	14857	13559	20998	30734	29563	14013	14262	22107	23736	18599	17814	31423	27299	30106	46860	23363	32779	29504	16428	25370	17428	23725	39410	102950	24599	32448	33253	53782	27225	47533	33864	(299.10654, 8753.95)(300.10974, 4000.67)(316.13303, 7580.1147)(317.1353, 4428.3)	6.00246
416.2024@6.049308	61538	68069	67219	38816	47337	62636	42307	61782	149254	194592	49101	1	1	39666	1	40623	1	36363	38930	1	151147	38960	56986	1	1	43986	1	1	34776	30800	56248	36971	39307	48063	43801	1	1	(417.20953, 18999.016)(418.21268, 4222.6875)	6.04931
500.1538@6.034891	192117	80489	114693	117245	81726	45311	146833	136904	50676	65017	62704	55524	48029	53874	41998	38942	40270	60705	67929	64683	52485	53820	67518	56052	38630	71293	62786	66912	64454	69633	80646	55343	98917	88689	37364	90618	55898	(501.16074, 27570.148)(502.16443, 6904.1846)(503.1671, 3905.5469)	6.03489
438.1892@6.0646753	54144	47720	58872	53239	32040	47050	55550	42182	39653	46839	60516	49582	49011	40550	45360	50423	50472	41764	65851	48219	55084	53649	57665	50260	39160	66193	72537	57273	45300	46974	47791	46668	58886	68528	55979	64109	52737	(439.19672, 19477.543)(440.20038, 5090.6436)(441.20837, 3615.12)(421.1848, 4648.158)	6.06468
776.215@6.047777	321310	22851	29279	25880	18664	1	24580	28864	130456	197366	247508	249679	255616	264692	214597	224512	193209	269212	89752	332230	327580	298597	263889	217572	57184	304501	297796	313736	370973	291270	279902	66954	307469	142496	40060	80869	303384	(777.22186, 54339.004)(778.225, 19029.43)(779.2234, 8046.4614)(780.2245, 2869.45)	6.04778
368.1113@6.028965	239422	222054	239869	1	190442	1	1	236178	1	253608	231846	218781	25633	1	161656	1	1	224963	210728	35127	242252	227070	241456	34657	174402	234714	236970	203176	35616	1	29866	189632	266617	37812	1	239404	26892	(737.2299, 5586.444)(738.2332, 8541.64)(369.1186, 49784.27)(370.1221, 10349.8)(371.127, 2849.9243)(351.10876, 4289.9946)	6.02897
771.2586@6.0710635	28145	27731	23814	33627	18102	1	39776	33143	22073	29756	31231	27347	26065	30447	1	20604	1	29925	36935	44727	35601	33153	37450	31720	1	41813	32887	37742	52382	35129	40240	26739	41748	58034	1	31255	33424	(772.2658, 12101.125)(773.2691, 4895.811)	6.07106
530.1643@6.0677505	133214	118680	95412	173575	88977	1	193836	170550	90620	154156	165451	136560	127641	147532	80236	109018	75570	143761	175897	206546	178646	150523	184229	157900	90587	200652	170036	178320	231536	159706	201506	134387	186729	261469	69763	145508	165393	(531.17163, 54045.453)(532.17474, 13038.167)(533.1786, 4090.4307)	6.06775
640.2346@6.0727296	63593	51292	59089	56787	39576	52399	60094	49505	44523	58712	61065	53039	51819	48029	44485	54090	56757	51719	63938	53995	55497	55350	54747	52926	50432	59343	68601	58413	52817	53981	59703	46747	63351	70074	61812	61844	51622	(641.242, 16106.782)(642.24475, 5252.4014)	6.07273
456.2004@6.0751877	364678	280590	333854	335681	224128	282274	349305	285227	265567	324272	360372	291237	297376	259112	254338	334061	292355	278534	377292	309112	316617	331997	310424	293589	288960	355478	379994	320338	292689	317508	336004	268257	361287	410490	330586	344821	296347	(457.20752, 91126.664)(458.21066, 21072.105)(459.2128, 4595.216)	6.07519
618.2527@6.0846763	139602	113906	130315	140065	84603	115402	148640	108706	99516	134267	157088	127875	125962	117764	99474	137971	113227	121367	156885	115827	130071	132829	121707	126686	123664	135974	148157	129591	113585	124807	150809	98705	144979	169475	134909	136094	114244	(619.2602, 43750.87)(620.26294, 13488.151)(621.2625, 3883.2585)	6.08468
968.3897@6.122445	97343	81575	167308	78061	55067	44928	103538	32704	52454	103800	101372	100697	118503	103544	80573	139445	107231	1	113580	63692	59630	56838	130815	121747	78644	155356	85110	196071	21305	145225	286780	209759	14680	122218	81655	191081	136100	(485.2018, 6029.107)(485.704, 2630.37)(969.3968, 17189.404)(970.3996, 9393.243)(971.40216, 4094.0085)(991.3783, 4197.3564)(992.3834, 3618.44)	6.12244
668.3031@6.125077	1	1	1	1	1	1	13347	1	13788	56577	44933	50812	13274	44657	35031	1	69897	48343	35071	1	1	14205	99904	48575	62744	29123	1	46719	12145	34810	65373	86798	58210	17725	35811	36542	34235	(669.3111, 5728.2266)(670.3116, 3868.16)(651.3002, 6430.4907)(652.3041, 3929.71)(686.3371, 6979.596)(687.33966, 3842.9534)(691.293, 8520.551)(692.297, 3636.304)	6.12508
162.0529@6.3400855	363485	245711	265937	306758	218471	364514	322625	377961	512305	533236	478049	450635	254477	1	512542	434231	1	221756	615198	53657	47235	88792	52022	37309	13974	618833	629741	46624	63535	73084	40250	37887	207655	41382	81059	62161	56950	(325.11316, 42490.7)(326.1167, 9524.213)(327.1196, 3570.63)(163.0604, 12703.251)(145.04898, 11558.906)	6.34009
224.1408@6.141622	127188	74424	169044	161535	133003	148580	147696	101529	156473	121522	74541	130568	106311	51826	99637	113074	130968	94749	170681	119868	110985	106973	112916	99616	106259	126430	118051	68850	119785	134381	147649	124081	76765	80848	132807	131477	128026	(225.14796, 23091.996)(226.15128, 3796.386)(207.13771, 25585.455)(208.1404, 4033.1238)(247.1302, 8137.117)	6.14162
530.1642@6.146277	162453	171728	191160	215292	104974	64600	242985	90190	62683	90143	96270	73318	66780	55911	52214	88487	1	77041	127230	117484	116470	106734	93218	91077	79418	157010	73807	104635	165148	120889	106411	72410	127453	210720	91157	156556	100788	(531.1713, 46905.2)(532.1745, 11099.466)(533.1771, 4260.7686)	6.14628
481.1411@6.1496677	39165	53020	55188	1	1	39960	1	1	101437	97413	80539	59442	78667	122929	82294	90105	78947	101041	96712	60362	125669	66391	65968	84026	67804	63523	51730	56149	65730	148796	121189	93270	95247	139986	93109	134220	95200	(482.1486, 33330.773)(483.15213, 8340.06)(484.15076, 3883.6833)	6.14967
681.2396@6.153029	23473	1	19580	23609	1	54417	22123	55736	47560	66642	59857	59750	60652	31321	55822	81243	66290	61553	65236	1	74049	57850	66733	62561	71358	58758	69888	55729	72479	75643	76458	35026	73732	70878	56331	66676	63791	(682.247, 11849.616)(683.2501, 4585.907)(684.26166, 12153.679)(685.26495, 4632.3433)	6.15303
618.2527@6.163054	164302	122985	146262	150860	95832	127917	169366	117461	114154	159683	180046	143764	135682	125401	110826	156507	137633	135787	187235	132159	146538	149172	128943	135138	153180	157488	167123	140954	128210	152760	179235	120062	176539	211044	156207	163825	136318	(619.25995, 35720.203)(620.2629, 10906.637)(621.2641, 3620.7617)(641.2417, 15696.554)(642.2487, 7987.8115)(643.24945, 3495.5896)	6.16305
456.2002@6.163055	201798	156321	177492	190427	120048	158550	205846	153317	134953	181953	207208	174859	152455	146782	131859	194903	160124	167210	217603	165376	180746	186296	145730	160926	176336	192729	207025	171236	164814	186848	202137	131265	201020	247027	203436	196192	164779	(457.2073, 68604.46)(458.21014, 16029.023)(459.21213, 3855.4138)	6.16305
324.1085@6.2464504	88745	76875	63314	55734	1	58707	61150	88243	1	1	57450	1	53041	49403	52528	50106	47632	76549	43845	44822	60157	168694	54429	1	43329	69720	59286	59503	152962	45116	61319	52056	62054	48711	1	62288	51142	(649.2202, 9014.61)(163.0605, 5196.328)(325.1155, 23341.48)(326.1195, 4630.5576)	6.24645
440.3649@6.3575	19655	13121	19724	4689760	11142	18869	13255	12505	22419	13784	35886	20152	28750	20117	54730	27619	31413	491602	701756	16848	557172	1	16545	26467	483916	32839	29725	567494	165050	15321	14074	13385	568072	25280	15176	540678	20452	(441.37256, 73052.65)(442.37576, 32003.227)(443.37946, 13191.428)(444.383, 6667.99)(423.36188, 26458.566)(424.3656, 25010.506)(425.3709, 6213.202)	6.3575
530.1642@6.2064857	77324	68710	76432	60736	41789	1	73151	151525	52063	50044	55714	68229	59554	59803	70040	33512	1	103572	56357	44939	100829	41700	60024	57990	35021	64566	52858	48517	91869	96771	82896	59993	94713	111065	28053	64229	37895	(531.1713, 24689.42)(532.17444, 6251.6694)(533.1779, 4323.16)	6.20649
1178.5219@6.2679725	107987	87881	92446	99413	95835	95525	99664	99932	122381	113476	110142	105589	122663	96884	117626	117801	115060	93826	119969	115972	108908	106992	115347	106774	101723	122782	136726	107096	89274	104211	87627	96283	101218	118239	106687	95282	106953	(590.26776, 21054.63)(590.76965, 13215.147)(591.2694, 9729.398)(591.7704, 4277.902)	6.26797
962.5448@6.2690268	28797	25381	27323	27054	57973	69058	84316	64949	35925	112505	36849	105526	117397	84034	32134	37713	38180	83633	47539	94013	32465	91943	35505	91638	26865	43628	42429	32850	71561	29782	26503	28327	32605	34973	29198	29648	28005	(963.55194, 11249.074)(964.555, 6164.53)(965.5585, 2775.88)(945.5413, 19169.41)(946.54456, 10013.184)(947.5475, 3891.9175)	6.26903
1162.5475@6.2674594	33593	27003	31324	28419	28015	27740	30893	29922	37316	32155	29734	34232	34166	28473	36101	32926	33746	32979	34959	30959	32867	33643	30986	31967	30031	37415	42283	34227	28929	30791	22682	28129	35895	36600	32182	34936	30344	(582.2806, 9167.678)(582.7877, 5911.583)(583.29004, 3040.6301)	6.26746
[truncated: 1,094 more rows]

## Sheet: LC-MS neg
Compound	1_1	1_10	1_2	1_3	1_5	1_6	1_7	1_9	2_1	2_10	2_2	2_3	2_4	2_5	2_6	2_7	2_8	2_9	3_1	3_10	3_2	3_3	3_4	3_5	3_6	3_7	3_8	3_9	4_10_2	4_2	4_3	4_4	4_5	4_6	4_6_2	4_7	4_9	CompositeSpectrum	Retention Time
[truncated: 708 more rows]
