# Supplementary material for: Hyperaccumulation of zinc by Noccaea caerulescens results in a cascade of stress responses and changes in the elemental profile
Source: Royal Society of Chemistry journal article supplement (doi:10.1039/c4mt00132j), 2014-01-01
Supplement: c4mt00132j2.pdf [file c4mt00132j2.pdf]

## Supporting information

**Figure S1:** Positive ion internal standard area by injection order

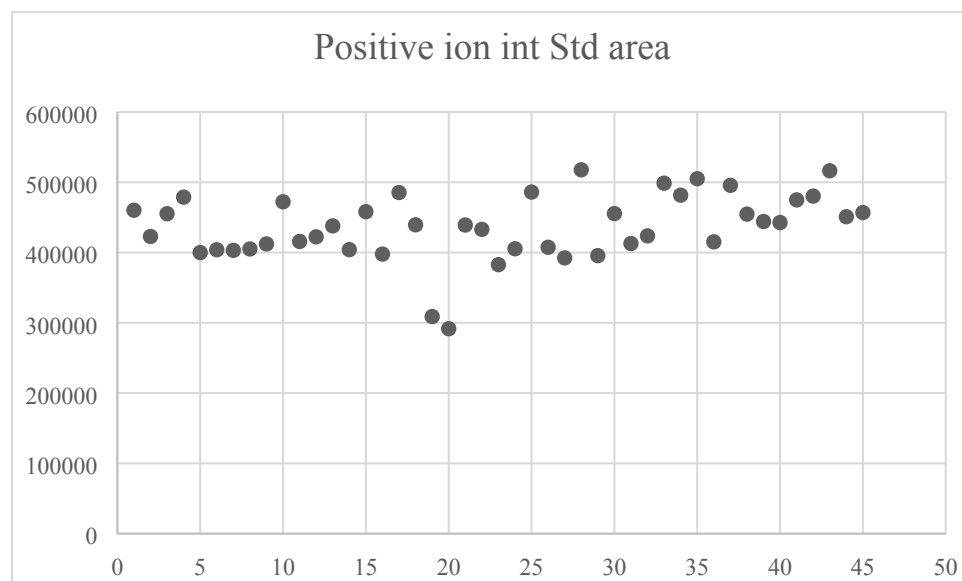

**Figure S2:** Leaf fresh mass of sixteen week old *N. caerulea* plants. Data represents mean  $\pm$  standard error ( $n = 10$ ) for each Zn treatment

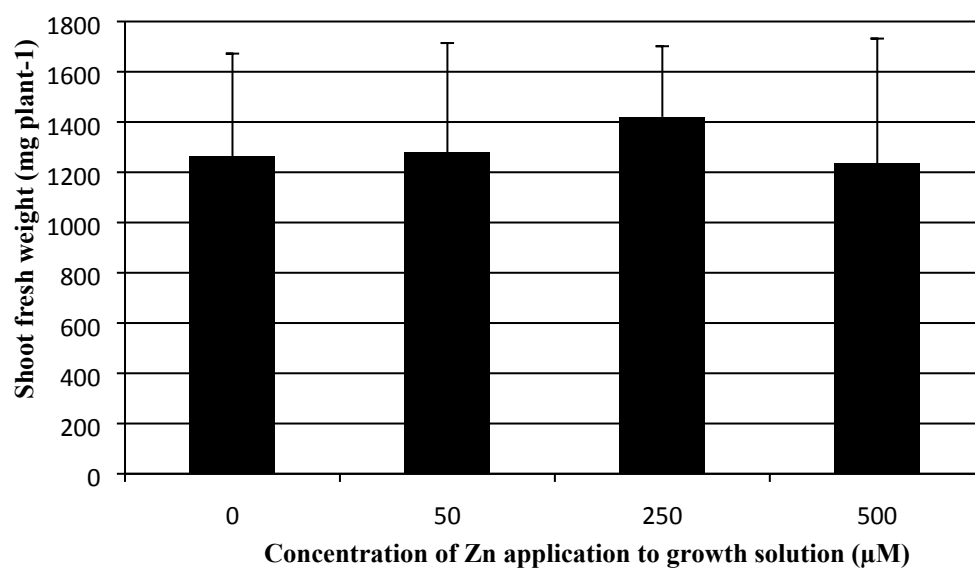

**Figure S3:** Principal components analysis of the negative ion dataset with 708 mass features. Zn treatment groups are: control (blue), 50  $\mu$ M (brown), 250  $\mu$ M red, 500 $\mu$ M grey (PC – principal component number).

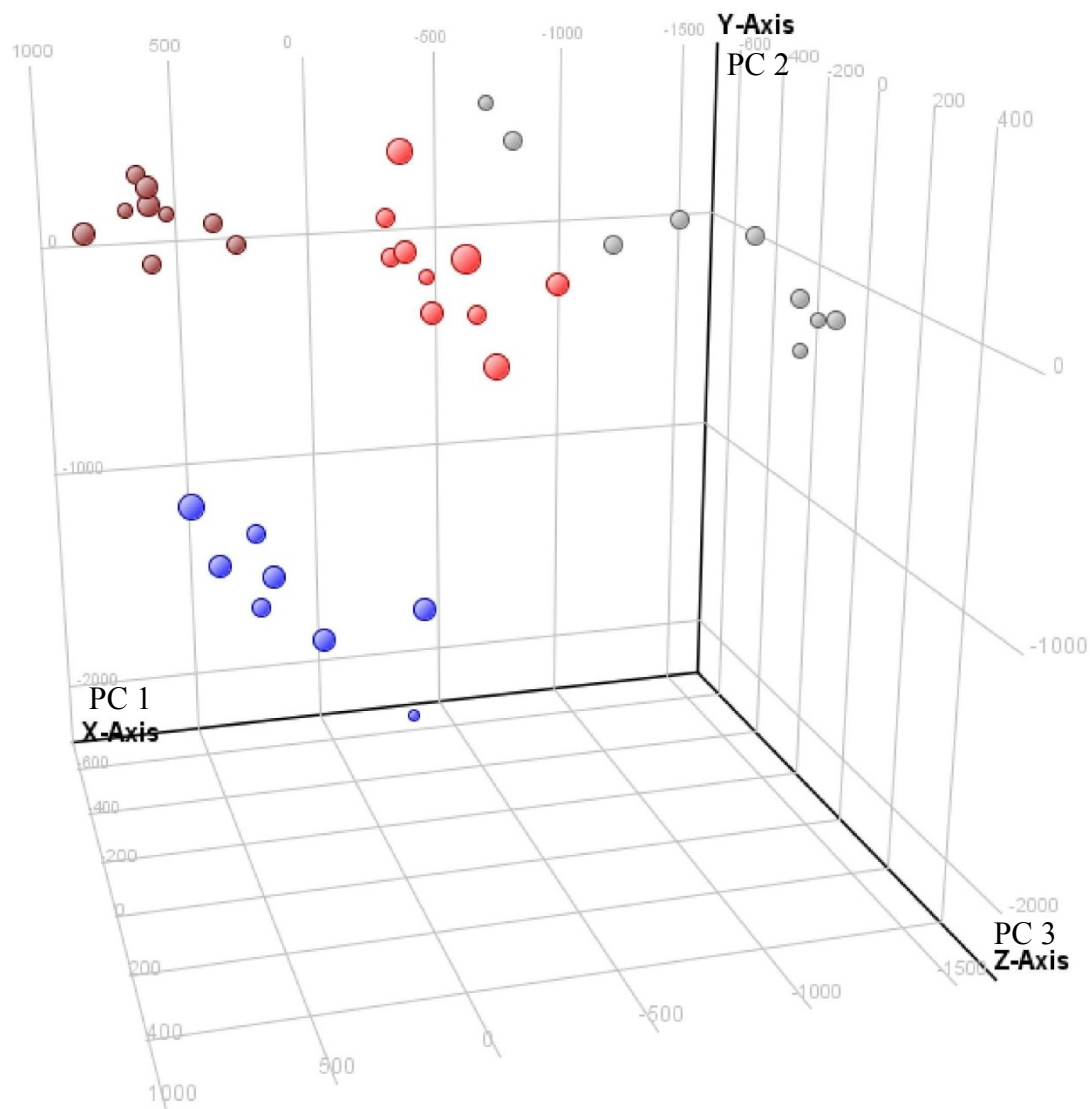

**Figure S4:** Principal components analyses of the GC-MS data: (top) all metabolites, (bottom) identified peaks only. Zn treatment groups are as follows: control (C), 50 $\mu$ M (L), 250  $\mu$ M (M) and 500  $\mu$ M (H). The percentage variation explained by each individual PC is shown in parentheses on each axis.

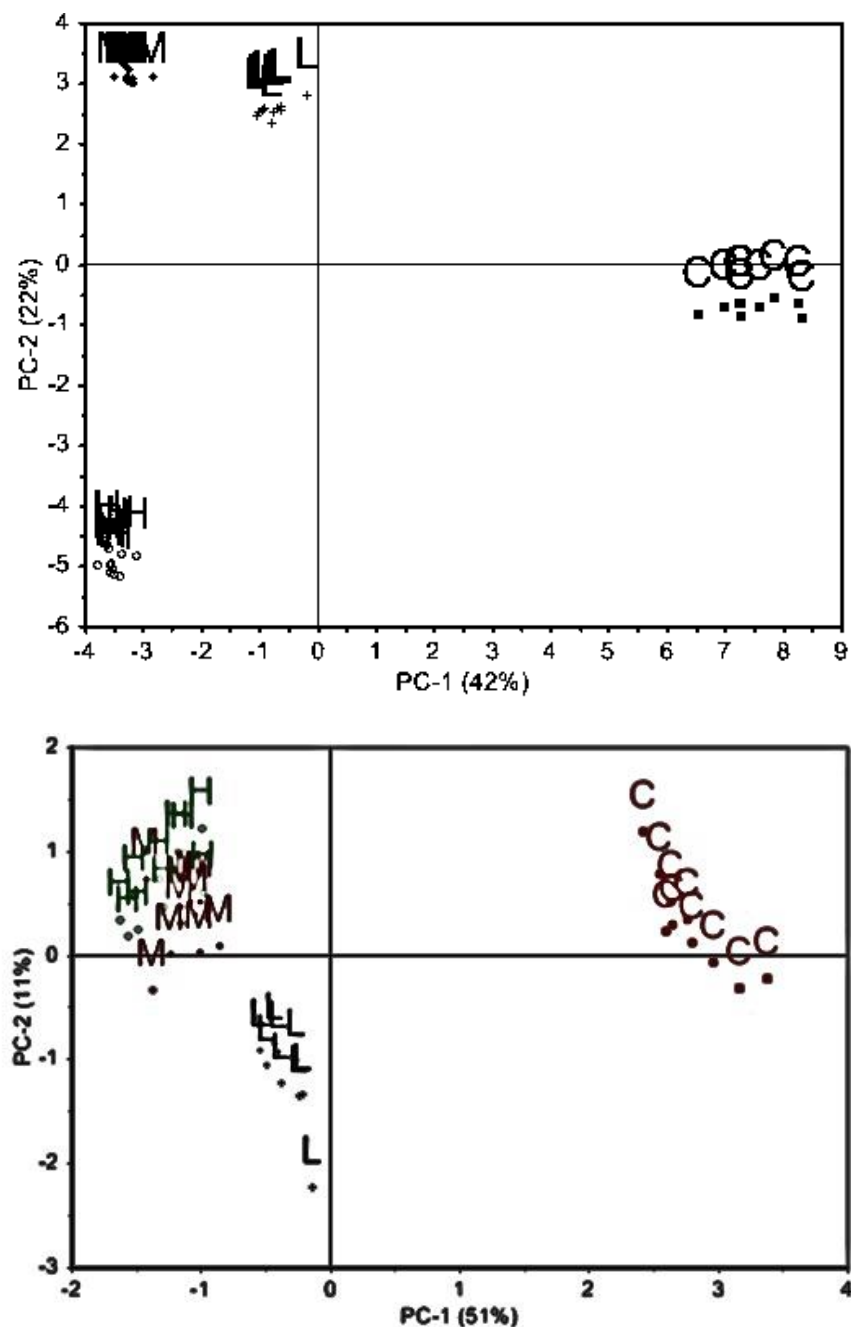

**Table S1:** Concentrations of hydroponic nutrients of the modified 1/5 strength Hoagland's solution, pH 6.0.

| Salt                                                                               | Final conc.<br>mmol/L |
|------------------------------------------------------------------------------------|-----------------------|
| Ca(NO <sub>3</sub> ) <sub>2</sub> ·4H <sub>2</sub> O                               | 1.5                   |
| NH <sub>4</sub> NO <sub>3</sub>                                                    | 0.5                   |
| KNO <sub>3</sub>                                                                   | 1                     |
| MgSO <sub>4</sub> ·7H <sub>2</sub> O                                               | 0.5                   |
| MES                                                                                | 1                     |
| NaOH                                                                               | 0.5                   |
| KH <sub>2</sub> PO <sub>4</sub>                                                    | 0.02                  |
| H <sub>3</sub> BO <sub>4</sub>                                                     | 1.0E-03               |
| (NH <sub>4</sub> ) <sub>6</sub> Mo <sub>7</sub> O <sub>24</sub> ·4H <sub>2</sub> O | 1.0E-5                |
| Fe-EDTA                                                                            | 0.1                   |
| MnSO <sub>4</sub> ·H <sub>2</sub> O                                                | 7.0E-04               |
| ZnSO <sub>4</sub> ·7H <sub>2</sub> O                                               | 5.0E-03               |
| CuSO <sub>4</sub> ·5H <sub>2</sub> O                                               | 1.0E-04               |

**Table S2:** The full LC-MS and GC-MS data datasets.

Submitted as electronic file.

**Table S3** Metabolites from GC-MS data set which had significantly different changes between treatment groups and control, calculated using the Student's *t*-tests (normalized values for the controls are not shown). Data obtained from TMS analysis of Zn treated *N. caerulea* leaf tissue were normalised to the mean response calculated for the control plants. Values are presented as the mean  $\pm$ SE of 10 independent biological replicates. Those that are significantly different ( $P < 0.05$ ) to the controls are set in bold type, blue colouring are significant according to student's *t*-Test and green colouring are significant by Bonferroni-corrected *t*-Test.

| Metabolites          | 50           | $\pm$ | SE           | 250           | $\pm$ | SE           | 500           | $\pm$ | SE           |
|----------------------|--------------|-------|--------------|---------------|-------|--------------|---------------|-------|--------------|
| <b>Amino acids</b>   |              |       |              |               |       |              |               |       |              |
| Arginine             | 0.429        | $\pm$ | 0.119        | <b>0.284</b>  | $\pm$ | <b>0.141</b> | <b>0.284</b>  | $\pm$ | <b>0.135</b> |
| Asparagine           | 1.000        | $\pm$ | 0.065        | 0.841         | $\pm$ | 0.061        | <b>0.792</b>  | $\pm$ | <b>0.030</b> |
| GABA                 | 1.218        | $\pm$ | 0.074        | <b>1.595</b>  | $\pm$ | <b>0.122</b> | <b>1.996</b>  | $\pm$ | <b>0.101</b> |
| Glutamate            | 0.870        | $\pm$ | 0.078        | <b>0.776</b>  | $\pm$ | <b>0.041</b> | <b>0.721</b>  | $\pm$ | <b>0.027</b> |
| Glycine              | 0.792        | $\pm$ | 0.075        | <b>0.613</b>  | $\pm$ | <b>0.075</b> | <b>0.625</b>  | $\pm$ | <b>0.069</b> |
| Lysine               | 0.964        | $\pm$ | 0.086        | <b>0.734</b>  | $\pm$ | <b>0.066</b> | 0.797         | $\pm$ | 0.051        |
| Ornithine            | 0.787        | $\pm$ | 0.125        | <b>0.573</b>  | $\pm$ | <b>0.091</b> | <b>0.568</b>  | $\pm$ | <b>0.029</b> |
| Pyroglutamate        | 0.829        | $\pm$ | 0.087        | <b>0.812</b>  | $\pm$ | <b>0.061</b> | <b>0.756</b>  | $\pm$ | <b>0.026</b> |
| Serine               | 0.933        | $\pm$ | 0.077        | <b>0.732</b>  | $\pm$ | <b>0.071</b> | <b>0.750</b>  | $\pm$ | <b>0.045</b> |
| Tyrosine             | <b>1.679</b> | $\pm$ | <b>0.119</b> | 1.217         | $\pm$ | 0.094        | 1.228         | $\pm$ | 0.065        |
| Valine               | 0.859        | $\pm$ | 0.079        | <b>0.780</b>  | $\pm$ | <b>0.068</b> | <b>0.820</b>  | $\pm$ | <b>0.037</b> |
| Putrescine           | <b>1.348</b> | $\pm$ | <b>0.061</b> | 1.102         | $\pm$ | 0.078        | <b>1.451</b>  | $\pm$ | <b>0.105</b> |
| <b>Organic acids</b> |              |       |              |               |       |              |               |       |              |
| Aconitate            | <b>1.396</b> | $\pm$ | <b>0.029</b> | <b>1.704</b>  | $\pm$ | <b>0.072</b> | <b>1.689</b>  | $\pm$ | <b>0.059</b> |
| Citrate              | <b>1.248</b> | $\pm$ | <b>0.028</b> | <b>1.529</b>  | $\pm$ | <b>0.070</b> | <b>1.603</b>  | $\pm$ | <b>0.030</b> |
| Isocitrate           | <b>1.350</b> | $\pm$ | <b>0.029</b> | 1.032         | $\pm$ | 0.214        | <b>0.509</b>  | $\pm$ | <b>0.121</b> |
| Threonate            | 1.118        | $\pm$ | 0.073        | <b>1.292</b>  | $\pm$ | <b>0.057</b> | <b>1.296</b>  | $\pm$ | <b>0.033</b> |
| Sinapinate           | <b>1.466</b> | $\pm$ | <b>0.063</b> | <b>1.426</b>  | $\pm$ | <b>0.032</b> | <b>1.446</b>  | $\pm$ | <b>0.078</b> |
| <b>Sugars</b>        |              |       |              |               |       |              |               |       |              |
| Fructose             | <b>1.259</b> | $\pm$ | <b>0.063</b> | <b>1.322</b>  | $\pm$ | <b>0.066</b> | <b>1.265</b>  | $\pm$ | <b>0.058</b> |
| Galactinol           | <b>5.998</b> | $\pm$ | <b>0.113</b> | <b>4.487</b>  | $\pm$ | <b>0.072</b> | <b>0.486</b>  | $\pm$ | <b>0.067</b> |
| Gluconate            | <b>4.569</b> | $\pm$ | <b>0.214</b> | <b>10.404</b> | $\pm$ | <b>0.514</b> | <b>33.846</b> | $\pm$ | <b>0.378</b> |
| Raffinose            | 0.949        | $\pm$ | 0.113        | 1.034         | $\pm$ | 0.059        | <b>0.626</b>  | $\pm$ | <b>0.065</b> |
| Sucrose              | 0.934        | $\pm$ | 0.069        | 1.003         | $\pm$ | 0.095        | <b>0.808</b>  | $\pm$ | <b>0.069</b> |
| Disaccharide1        | <b>0.382</b> | $\pm$ | <b>0.133</b> | <b>0.732</b>  | $\pm$ | <b>0.075</b> | 0.956         | $\pm$ | 0.167        |
